# Supplementary material for: Wolbachia, Cardinium and climate: an analysis of global data
Source: Biol Lett. 2019 Aug 21;15(8):20190273. doi: 10.1098/rsbl.2019.0273 (PMC6731486; doi:10.1098/rsbl.2019.0273)
Supplement: Table S1 [file rsbl20190273supp2.xls]

## Sheet: Results.wolb.Chelicerata.txt
Bacterium	Host_group	n_screens	n_individuals	n_infected	min(n_species)	max(n_species)	MeanPrevalence_model	rho_model	np	lnL	AIC	temp-slope	temp-p.value
Wolbachia	Mandibulata	7986	102267	47734	2451	3686	-	-	2	-11015	22033.9	na	na
Wolbachia	Mandibulata	7986	102267	47734	2451	3686	temp	-	3	-11008.6	22023.3	-0.0107793	0.000375518
Wolbachia	Mandibulata	7986	102267	47734	2451	3686	temp	temp	4	-10987.4	21982.9	-0.0117993	0.000108475
Wolbachia	Mandibulata	7986	102267	47734	2451	3686	K5	-	6	-10979.9	21971.8	na	na
Wolbachia	Mandibulata	7986	102267	47734	2451	3686	K5	K5	10	-10953.8	21927.7	na	na
Wolbachia	Mandibulata	7986	102267	47734	2451	3686	temp+K5	-	7	-10970	21953.9	0.0236505	7.79472e-06
Wolbachia	Mandibulata	7986	102267	47734	2451	3686	temp+K5	temp+K5	12	-10941.5	21906.9	0.0232998	1.26211e-05
Wolbachia	Mandibulata	7986	102267	47734	2451	3686	K31	-	27	-10844	21742	na	na
Wolbachia	Mandibulata	7986	102267	47734	2451	3686	temp+K31	-	28	-10843.8	21743.7	0.0035554	0.589846
Wolbachia	Chelicerata	638	8413	2147	323	350	-	-	2	-1000.89	2005.79	na	na
Wolbachia	Chelicerata	638	8413	2147	323	350	temp	-	3	-1000.84	2007.68	-0.00469156	0.745825
Wolbachia	Chelicerata	638	8413	2147	323	350	temp	temp	4	-1000.39	2008.78	-0.00354614	0.809171
Wolbachia	Chelicerata	638	8413	2147	323	350	K5	-	6	-992.342	1996.68	na	na
Wolbachia	Chelicerata	638	8413	2147	323	350	K5	K5	10	-989.23	1998.46	na	na
Wolbachia	Chelicerata	638	8413	2147	323	350	temp+K5	-	7	-992.323	1998.65	0.00332945	0.842578
Wolbachia	Chelicerata	638	8413	2147	323	350	temp+K5	temp+K5	12	-989.213	2002.43	0.00319744	0.850231
Wolbachia	Chelicerata	638	8413	2147	323	350	K31	-	20	-954.751	1949.5	na	na
Wolbachia	Chelicerata	638	8413	2147	323	350	temp+K31	-	21	-953.747	1949.49	0.035456	0.147182
Wolbachia	Coleoptera	568	5812	1941	222	324	-	-	2	-690.332	1384.66	na	na
Wolbachia	Coleoptera	568	5812	1941	222	324	temp	-	3	-665.757	1337.51	-0.083583	7.18865e-11
Wolbachia	Coleoptera	568	5812	1941	222	324	temp	temp	4	-661.775	1331.55	-0.077008	1.452e-09
Wolbachia	Coleoptera	568	5812	1941	222	324	K5	-	6	-644.469	1300.94	na	na
Wolbachia	Coleoptera	568	5812	1941	222	324	K5	K5	10	-637.634	1295.27	na	na
Wolbachia	Coleoptera	568	5812	1941	222	324	temp+K5	-	7	-643.334	1300.67	0.0373041	0.12645
Wolbachia	Coleoptera	568	5812	1941	222	324	temp+K5	temp+K5	12	-631.648	1287.3	0.0383641	0.116434
Wolbachia	Coleoptera	568	5812	1941	222	324	K31	-	20	-601.03	1242.06	na	na
Wolbachia	Coleoptera	568	5812	1941	222	324	temp+K31	-	21	-597.657	1237.31	-0.0806598	0.00892021
Wolbachia	Diptera	2194	40970	24637	601	879	-	-	2	-3521.39	7046.77	na	na
Wolbachia	Diptera	2194	40970	24637	601	879	temp	-	3	-3520.94	7047.88	0.00537594	0.343743
Wolbachia	Diptera	2194	40970	24637	601	879	temp	temp	4	-3516.77	7041.55	0.0065245	0.249637
Wolbachia	Diptera	2194	40970	24637	601	879	K5	-	6	-3504.32	7020.65	na	na
Wolbachia	Diptera	2194	40970	24637	601	879	K5	K5	10	-3489.43	6998.87	na	na
Wolbachia	Diptera	2194	40970	24637	601	879	temp+K5	-	7	-3481.64	6977.28	0.0668945	1.95751e-11
Wolbachia	Diptera	2194	40970	24637	601	879	temp+K5	temp+K5	12	-3464.64	6953.28	0.0685562	0
Wolbachia	Diptera	2194	40970	24637	601	879	K31	-	23	-3302.73	6651.46	na	na
Wolbachia	Diptera	2194	40970	24637	601	879	temp+K31	-	24	-3300.33	6648.65	0.0299753	0.0227116
Wolbachia	Culicidae (Diptera)	513	13710	11586	69	79	-	-	2	-819.933	1643.87	na	na
Wolbachia	Culicidae (Diptera)	513	13710	11586	69	79	temp	-	3	-786.622	1579.24	-0.113341	9.78e-15
Wolbachia	Culicidae (Diptera)	513	13710	11586	69	79	temp	temp	4	-777.613	1563.23	-0.0965033	8.11e-11
Wolbachia	Culicidae (Diptera)	513	13710	11586	69	79	K5	-	5	-764.094	1538.19	na	na
Wolbachia	Culicidae (Diptera)	513	13710	11586	69	79	K5	K5	8	-757.698	1531.4	na	na
Wolbachia	Culicidae (Diptera)	513	13710	11586	69	79	temp+K5	-	6	-761.715	1535.43	0.0711165	0.0270964
Wolbachia	Culicidae (Diptera)	513	13710	11586	69	79	temp+K5	temp+K5	10	-748.669	1517.34	0.108481	0.00140919
Wolbachia	Culicidae (Diptera)	513	13710	11586	69	79	K31	-	19	-689.808	1417.62	na	na
Wolbachia	Culicidae (Diptera)	513	13710	11586	69	79	temp+K31	-	20	-689.415	1418.83	0.0355757	0.361693
Wolbachia	Diptera_minus_Culicidae	1680	27259	13051	532	799	-	-	2	-2435.63	4875.26	na	na
Wolbachia	Diptera_minus_Culicidae	1680	27259	13051	532	799	temp	-	3	-2433.18	4872.35	-0.0155926	0.0222961
Wolbachia	Diptera_minus_Culicidae	1680	27259	13051	532	799	temp	temp	4	-2431.6	4871.2	-0.0154466	0.0260984
Wolbachia	Diptera_minus_Culicidae	1680	27259	13051	532	799	K5	-	6	-2426.26	4864.51	na	na
Wolbachia	Diptera_minus_Culicidae	1680	27259	13051	532	799	K5	K5	10	-2420.56	4861.12	na	na
Wolbachia	Diptera_minus_Culicidae	1680	27259	13051	532	799	temp+K5	-	7	-2426.02	4866.04	0.00782871	0.475397
Wolbachia	Diptera_minus_Culicidae	1680	27259	13051	532	799	temp+K5	temp+K5	12	-2414.03	4852.06	0.0140397	0.198148
Wolbachia	Diptera_minus_Culicidae	1680	27259	13051	532	799	K31	-	23	-2365.89	4777.77	na	na
Wolbachia	Diptera_minus_Culicidae	1680	27259	13051	532	799	temp+K31	-	24	-2364.44	4776.87	-0.027076	0.0812324
Wolbachia	Hemiptera	1076	16779	6468	304	380	-	-	2	-1622.21	3248.42	na	na
Wolbachia	Hemiptera	1076	16779	6468	304	380	temp	-	3	-1619.69	3245.38	-0.0220632	0.0211739
Wolbachia	Hemiptera	1076	16779	6468	304	380	temp	temp	4	-1611.72	3231.44	-0.0236752	0.0141777
Wolbachia	Hemiptera	1076	16779	6468	304	380	K5	-	6	-1607.31	3226.62	na	na
Wolbachia	Hemiptera	1076	16779	6468	304	380	K5	K5	10	-1597.87	3215.74	na	na
Wolbachia	Hemiptera	1076	16779	6468	304	380	temp+K5	-	7	-1605.4	3224.8	0.0300539	0.0465448
Wolbachia	Hemiptera	1076	16779	6468	304	380	temp+K5	temp+K5	12	-1594.65	3213.3	0.0303553	0.0456947
Wolbachia	Hemiptera	1076	16779	6468	304	380	K31	-	23	-1559.73	3165.46	na	na
Wolbachia	Hemiptera	1076	16779	6468	304	380	temp+K31	-	24	-1559.71	3167.41	0.0040568	0.820387
Wolbachia	Hymenoptera	2087	17477	7330	626	1236	-	-	2	-2214.73	4433.46	na	na
Wolbachia	Hymenoptera	2087	17477	7330	626	1236	temp	-	3	-2212.38	4430.75	-0.0164191	0.0296231
Wolbachia	Hymenoptera	2087	17477	7330	626	1236	temp	temp	4	-2200	4408.01	-0.0178617	0.0186602
Wolbachia	Hymenoptera	2087	17477	7330	626	1236	K5	-	6	-2212.63	4437.27	na	na
Wolbachia	Hymenoptera	2087	17477	7330	626	1236	K5	K5	10	-2208.44	4436.88	na	na
Wolbachia	Hymenoptera	2087	17477	7330	626	1236	temp+K5	-	7	-2207.23	4428.46	-0.0392256	0.00120926
Wolbachia	Hymenoptera	2087	17477	7330	626	1236	temp+K5	temp+K5	12	-2188.56	4401.13	-0.0426174	0.000424532
Wolbachia	Hymenoptera	2087	17477	7330	626	1236	K31	-	23	-2142.99	4331.98	na	na
Wolbachia	Hymenoptera	2087	17477	7330	626	1236	temp+K31	-	24	-2142.82	4333.63	-0.0106114	0.558859
Wolbachia	Lepidoptera	1416	13024	4684	471	520	-	-	2	-1924.18	3852.36	na	na
Wolbachia	Lepidoptera	1416	13024	4684	471	520	temp	-	3	-1923.69	3853.38	0.00552884	0.320868
Wolbachia	Lepidoptera	1416	13024	4684	471	520	temp	temp	4	-1912.16	3832.32	0.00218984	0.695445
Wolbachia	Lepidoptera	1416	13024	4684	471	520	K5	-	6	-1920.64	3853.28	na	na
Wolbachia	Lepidoptera	1416	13024	4684	471	520	K5	K5	10	-1898.87	3817.73	na	na
Wolbachia	Lepidoptera	1416	13024	4684	471	520	temp+K5	-	7	-1907.03	3828.06	0.0640903	2.7047e-07
Wolbachia	Lepidoptera	1416	13024	4684	471	520	temp+K5	temp+K5	12	-1881.39	3786.78	0.0687784	4.23668e-08
Wolbachia	Lepidoptera	1416	13024	4684	471	520	K31	-	24	-1890.18	3828.36	na	na
Wolbachia	Lepidoptera	1416	13024	4684	471	520	temp+K31	-	25	-1882.27	3814.54	0.0705196	6.31426e-05
Wolbachia	Acari	251	4914	1491	56	67	-	-	2	-531.213	1066.43	na	na
Wolbachia	Acari	251	4914	1491	56	67	temp	-	3	-531.137	1068.27	0.00750329	0.695534
Wolbachia	Acari	251	4914	1491	56	67	temp	temp	4	-523.992	1055.98	0.00615976	0.743907
Wolbachia	Acari	251	4914	1491	56	67	K5	-	6	-523.683	1059.37	na	na
Wolbachia	Acari	251	4914	1491	56	67	K5	K5	10	-523.353	1066.71	na	na
Wolbachia	Acari	251	4914	1491	56	67	temp+K5	-	7	-523.546	1061.09	0.0118429	0.600415
Wolbachia	Acari	251	4914	1491	56	67	temp+K5	temp+K5	12	-510.122	1044.24	0.0171499	0.424189
Wolbachia	Acari	251	4914	1491	56	67	K31	-	16	-512.669	1057.34	na	na
Wolbachia	Acari	251	4914	1491	56	67	temp+K31	-	17	-512.337	1058.67	0.0238571	0.413467
Wolbachia	Chelicerata_minus_Acari	387	3499	656	267	283	-	-	2	-435.666	875.332	na	na
Wolbachia	Chelicerata_minus_Acari	387	3499	656	267	283	temp	-	3	-435.621	877.242	-0.00698531	0.759761
Wolbachia	Chelicerata_minus_Acari	387	3499	656	267	283	temp	temp	4	-421.013	850.027	0.0132534	0.560994
Wolbachia	Chelicerata_minus_Acari	387	3499	656	267	283	K5	-	6	-429.747	871.493	na	na
Wolbachia	Chelicerata_minus_Acari	387	3499	656	267	283	temp+K5	-	7	-429.282	872.563	-0.0261461	0.322562
Wolbachia	Chelicerata_minus_Acari	387	3499	656	267	283	K31	-	18	-414.085	864.169	na	na
Wolbachia	Chelicerata_minus_Acari	387	3499	656	267	283	temp+K31	-	19	-411.611	861.223	0.122639	0.0252977
Wolbachia	Araneae	329	3425	644	220	230	-	-	2	-406.344	816.687	na	na
Wolbachia	Araneae	329	3425	644	220	230	temp	-	3	-406.083	818.166	-0.0185305	0.458407
Wolbachia	Araneae	329	3425	644	220	230	temp	temp	4	-391.593	791.186	0.00756541	0.762817
Wolbachia	Araneae	329	3425	644	220	230	K5	-	6	-391.669	795.337	na	na
Wolbachia	Araneae	329	3425	644	220	230	temp+K5	-	7	-390.088	794.176	-0.0558157	0.0663249
Wolbachia	Araneae	329	3425	644	220	230	K31	-	16	-375.707	783.414	na	na
Wolbachia	Araneae	329	3425	644	220	230	temp+K31	-	17	-375.679	785.357	-0.0192059	0.79494
Cardinium	Mandibulata	1374	11755	2070	623	814	-	-	2	-716.185	1436.37	na	na
Cardinium	Mandibulata	1374	11755	2070	623	814	temp	-	3	-689.959	1385.92	0.128048	7.0353e-13
Cardinium	Mandibulata	1374	11755	2070	623	814	temp	temp	4	-683.614	1375.23	0.143624	3.32282e-14
Cardinium	Mandibulata	1374	11755	2070	623	814	K5	-	6	-711.371	1434.74	na	na
Cardinium	Mandibulata	1374	11755	2070	623	814	K5	K5	10	-706.288	1432.58	na	na
Cardinium	Mandibulata	1374	11755	2070	623	814	temp+K5	-	7	-672.565	1359.13	0.217987	2.34197e-17
Cardinium	Mandibulata	1374	11755	2070	623	814	temp+K5	temp+K5	12	-663.11	1350.22	0.237328	3.54374e-18
Cardinium	Mandibulata	1374	11755	2070	623	814	K31	-	20	-665.982	1371.96	na	na
Cardinium	Mandibulata	1374	11755	2070	623	814	temp+K31	-	21	-648.697	1339.39	0.197979	3.26435e-09
Cardinium	Chelicerata	345	4718	1212	138	157	-	-	2	-487.783	979.567	na	na
Cardinium	Chelicerata	345	4718	1212	138	157	temp	-	3	-486.072	978.145	-0.0379688	0.0641785
Cardinium	Chelicerata	345	4718	1212	138	157	temp	temp	4	-483.176	974.352	-0.0544801	0.0111627
Cardinium	Chelicerata	345	4718	1212	138	157	K5	-	6	-484.963	981.926	na	na
Cardinium	Chelicerata	345	4718	1212	138	157	K5	K5	10	-480.6	981.2	na	na
Cardinium	Chelicerata	345	4718	1212	138	157	temp+K5	-	7	-483.474	980.949	-0.0423314	0.0831866
Cardinium	Chelicerata	345	4718	1212	138	157	temp+K5	temp+K5	12	-476.84	977.681	-0.057704	0.0229714
Cardinium	Chelicerata	345	4718	1212	138	157	K31	-	21	-469.375	980.75	na	na
Cardinium	Chelicerata	345	4718	1212	138	157	temp+K31	-	22	-469.314	982.628	-0.0116108	0.719951
Cardinium	Hemiptera	535	6127	1596	176	224	-	-	2	-440.403	884.805	na	na
Cardinium	Hemiptera	535	6127	1596	176	224	temp	-	3	-425.005	856.01	0.14853	4.20887e-08
Cardinium	Hemiptera	535	6127	1596	176	224	temp	temp	4	-421.402	850.804	0.161771	1.19141e-08
Cardinium	Hemiptera	535	6127	1596	176	224	K5	-	5	-432.66	875.32	na	na
Cardinium	Hemiptera	535	6127	1596	176	224	K5	K5	8	-430.542	877.083	na	na
Cardinium	Hemiptera	535	6127	1596	176	224	temp+K5	-	6	-422.519	857.039	0.172722	8.49376e-06
Cardinium	Hemiptera	535	6127	1596	176	224	temp+K5	temp+K5	10	-415.719	851.438	0.204559	5.32498e-07
Cardinium	Hemiptera	535	6127	1596	176	224	K31	-	18	-413.819	863.637	na	na
Cardinium	Hemiptera	535	6127	1596	176	224	temp+K31	-	19	-409.086	856.172	0.134239	0.0025448
Cardinium	Mandibulata_minus_Hemiptera	839	5628	474	447	590	-	-	2	-243.595	491.19	na	na
Cardinium	Mandibulata_minus_Hemiptera	839	5628	474	447	590	temp	-	3	-242.066	490.133	0.0518594	0.0785516
Cardinium	Mandibulata_minus_Hemiptera	839	5628	474	447	590	temp	temp	4	-239.804	487.608	0.0727414	0.0182157
Cardinium	Mandibulata_minus_Hemiptera	839	5628	474	447	590	K5	-	6	-240.869	493.739	na	na
Cardinium	Mandibulata_minus_Hemiptera	839	5628	474	447	590	K5	K5	10	-230.918	481.836	na	na
Cardinium	Mandibulata_minus_Hemiptera	839	5628	474	447	590	temp+K5	-	7	-229.331	472.663	0.213052	7.71666e-07
Cardinium	Mandibulata_minus_Hemiptera	839	5628	474	447	590	temp+K5	temp+K5	12	-217.639	459.277	0.226197	2.51501e-07
Cardinium	Mandibulata_minus_Hemiptera	839	5628	474	447	590	K31	-	18	-225.566	487.133	na	na
Cardinium	Mandibulata_minus_Hemiptera	839	5628	474	447	590	temp+K31	-	19	-218.333	474.666	0.226565	5.80266e-05
Cardinium	Acari	189	3374	752	40	46	-	-	2	-301.011	606.022	na	na
Cardinium	Acari	189	3374	752	40	46	temp	-	3	-300.686	607.372	-0.0197803	0.416361
Cardinium	Acari	189	3374	752	40	46	temp	temp	4	-298.594	605.188	-0.0376292	0.143485
Cardinium	Acari	189	3374	752	40	46	K5	-	6	-297.963	607.926	na	na
Cardinium	Acari	189	3374	752	40	46	K5	K5	10	-295.741	611.481	na	na
Cardinium	Acari	189	3374	752	40	46	temp+K5	-	7	-297.935	609.87	-0.00723356	0.811186
Cardinium	Acari	189	3374	752	40	46	temp+K5	temp+K5	12	-294.024	612.049	-0.0208319	0.506958
Cardinium	Acari	189	3374	752	40	46	K31	-	15	-293.586	617.172	na	na
Cardinium	Acari	189	3374	752	40	46	temp+K31	-	16	-293.306	618.612	-0.0296178	0.440401
Cardinium	Chelicerata_minus_Acari	156	1344	460	98	111	-	-	2	-186.075	376.151	na	na
Cardinium	Chelicerata_minus_Acari	156	1344	460	98	111	temp	-	3	-183.822	373.644	-0.0838396	0.0413965
Cardinium	Chelicerata_minus_Acari	156	1344	460	98	111	temp	temp	4	-182.296	372.591	-0.109573	0.00944063
Cardinium	Chelicerata_minus_Acari	156	1344	460	98	111	K5	-	6	-172.391	356.783	na	na
Cardinium	Chelicerata_minus_Acari	156	1344	460	98	111	K5	K5	10	-170.181	360.362	na	na
Cardinium	Chelicerata_minus_Acari	156	1344	460	98	111	temp+K5	-	7	-172.054	358.109	-0.0506876	0.411093
Cardinium	Chelicerata_minus_Acari	156	1344	460	98	111	temp+K5	temp+K5	12	-168.286	360.572	-0.0436901	0
Cardinium	Chelicerata_minus_Acari	156	1344	460	98	111	K31	-	18	-161.337	358.674	na	na
Cardinium	Chelicerata_minus_Acari	156	1344	460	98	111	temp+K31	-	19	-161.243	360.486	0.0433847	0.665521
Cardinium	Fulgoromorpha (Hemiptera)	61	1473	653	8	8	-	-	2	-103.701	211.402	na	na
Cardinium	Fulgoromorpha (Hemiptera)	61	1473	653	8	8	temp	-	3	-102.42	210.839	0.0991478	0.105848
Cardinium	Fulgoromorpha (Hemiptera)	61	1473	653	8	8	temp	temp	4	-100.861	209.723	0.0825338	0.184735
Cardinium	Fulgoromorpha (Hemiptera)	61	1473	653	8	8	K5	-	4	-102.596	213.192	na	na
Cardinium	Fulgoromorpha (Hemiptera)	61	1473	653	8	8	K5	K5	6	-101.467	214.934	na	na
Cardinium	Fulgoromorpha (Hemiptera)	61	1473	653	8	8	temp+K5	-	5	-101.954	213.907	0.119654	0.248348
Cardinium	Fulgoromorpha (Hemiptera)	61	1473	653	8	8	temp+K5	temp+K5	8	-100.366	216.731	0.0969687	0.34728
Cardinium	Fulgoromorpha (Hemiptera)	61	1473	653	8	8	K31	-	8	-100.484	216.968	na	na
Cardinium	Fulgoromorpha (Hemiptera)	61	1473	653	8	8	temp+K31	-	9	-99.6461	217.292	0.151515	0.190799
Cardinium	Sternorrhynca (Hemiptera)	296	989	55	131	163	-	-	2	-121.654	247.308	na	na
Cardinium	Sternorrhynca (Hemiptera)	296	989	55	131	163	temp	-	3	-120.953	247.907	0.0517676	0.243438
Cardinium	Sternorrhynca (Hemiptera)	296	989	55	131	163	temp	temp	4	-120.839	249.678	0.060988	0.194389
Cardinium	Sternorrhynca (Hemiptera)	296	989	55	131	163	K5	-	5	-120.845	251.689	na	na
Cardinium	Sternorrhynca (Hemiptera)	296	989	55	131	163	K5	K5	8	-119.034	254.067	na	na
Cardinium	Sternorrhynca (Hemiptera)	296	989	55	131	163	temp+K5	-	6	-120.773	253.546	0.0260003	0.707861
Cardinium	Sternorrhynca (Hemiptera)	296	989	55	131	163	temp+K5	temp+K5	10	-118.659	257.318	0.0411994	0.566965
Cardinium	Sternorrhynca (Hemiptera)	296	989	55	131	163	K31	-	14	-116.336	260.672	na	na
Cardinium	Sternorrhynca (Hemiptera)	296	989	55	131	163	temp+K31	-	15	-116.252	262.504	0.0308212	0.68556

## Sheet: Note
Note
For each taxonomic subset of the total database, we indicate:
n_screens	the total number of populations screened
n_individuals	the total number of individuals across all populations
n_infected	the total number of individuals infected with the named bacterium
min(n_species)	The minimum number of species represented (counting named species only)
max(n_species)	The number of species represented, assuming that each partially identified population (e.g., Drosophila spp.) came from a distinct and otherwise unsampled species
MeanPrevalence_model	The model fit to the mean prevalence parameter of the Beta distribution
rho_model	The model fit to the correlation parameter of the Beta distribution which describes how much of the variance in infection was distributed within or between populations
		-	A single parameter value applying to all data sets
		temp	Mean temperature (1970-2000) included as a linear predictor of logit transformed parameters
		K5	Five, higher-level Köppen climates as categorical predictors
		K31	Up to 31 finer-grained Köppen climates as categorical predictors
np	The total number of model parameters
lnL	Maximized log Likelihood
AIC	Akaike Information Criterion (increase in Maximized log likeihood, penalized by the number of model parameters)
temp-slope	The best-fit slope for Mean Temperature (where included in the model)
temp-p.value	The p-value associated with including Mean Temperature in the model.
