# Supplementary material for: Wolbachia, Cardinium and climate: an analysis of global data
Source: Biol Lett. 2019 Aug 21;15(8):20190273. doi: 10.1098/rsbl.2019.0273 (PMC6731486; doi:10.1098/rsbl.2019.0273)
Supplement: Table S3 [file rsbl20190273supp4.xlsx]

## Sheet: DB-Bio-Lett.New
class	order	family	genus	species	subpop	total	inf	pool_size	bac	country	location	latitude	longitude	year	month	paper	AnnualMeanTemp	TempSeason	MaxTempWarm	MinTempCold	Koppen
arachnida	Araneae	Agelenidae	Agelena	labyrinthica	NA	30	0	1	wolb	China	approx	30.5729	114.351	2008-2012	NA	Yan15	17.3	892.6	33.5	0.5	Cfa
arachnida	Araneae	Agelenidae	Agelena	labyrinthica	NA	10	0	1	wolb	China_Hubei	Huazhong_Agricultural_University_Wuhan_Hubei_Province	30.4719	114.351	2007-2008	Nov-Oct	Yun11	17.2	890.3	33.6	0.5	Cfa
arachnida	Araneae	Agelenidae	Agelenopsis	aleenae	NA	3	3	1	wolb	US_KS	KS1_Meade_SP_Kansas	37.17	-100.43	NA	NA	Baldo08	13.2	934.1	34.5	-8.1	BSk
arachnida	Araneae	Agelenidae	Agelenopsis	aleenae	NA	3	3	1	wolb	US_NM	NM3_Clines_Corner_NM	35.01	-105.67	NA	NA	Baldo08	8.9	747.2	28.8	-9.3	BSk
arachnida	Araneae	Agelenidae	Agelenopsis	aleenae	NA	1	0	1	wolb	US_NM	NM2a_Cimarron_Canyon_NM	36.51	-104.91	NA	NA	Baldo08	8.9	759.5	28.9	-10.7	BSk
arachnida	Araneae	Agelenidae	Agelenopsis	aleenae	NA	1	0	1	wolb	US_TX	TX1_Hye_TX	30.27	98.34	NA	NA	Baldo08	1.1	601.9	14.7	-16	Dwc
arachnida	Araneae	Agelenidae	Agelenopsis	aperta	NA	5	4	1	wolb	US_AZ	AZ2_Dead_Horse_Ranch_Az	34.6	-112.1	2000-2003	NA	Baldo08	12.4	704.1	31.4	-3.6	Csa
arachnida	Araneae	Agelenidae	Agelenopsis	aperta	NA	5	5	1	wolb	US_CA	CA2_Near_Don_Pedro_Reservoir_CA	37.82	-120.3	2000-2003	NA	Baldo08	14.8	650.5	34.9	0.5	Csa
arachnida	Araneae	Agelenidae	Agelenopsis	aperta	NA	5	5	1	wolb	US_CA	CA6_28_Big_Pine_CA	37.1	-118.3	2000-2003	NA	Baldo08	10.8	720.5	31.2	-5.9	BSk
arachnida	Araneae	Agelenidae	Agelenopsis	aperta	NA	2	2	1	wolb	US_CA	CA4_San_Diego_CA	32.73	-117.15	2000-2003	NA	Baldo08	17.2	301.6	25.9	8.1	Csa
arachnida	Araneae	Agelenidae	Agelenopsis	aperta	NA	1	1	1	wolb	US_CA	CA7_36_Bells_Station_CA	37.02	-121.19	NA	NA	Baldo08	15.1	575.6	33.8	1.4	Csa
arachnida	Araneae	Agelenidae	Agelenopsis	aperta	NA	1	1	1	wolb	US_CA	CA8_Riverside_CA	33.95	-117.39	NA	NA	Baldo08	18	478.1	34.2	4.6	BSk
arachnida	Araneae	Agelenidae	Agelenopsis	aperta	NA	5	4	1	wolb	US_CO	CO5_Avondale_Co	38.22	-104.39	2000-2003	NA	Baldo08	11.6	891.8	33.8	-9.7	BSk
arachnida	Araneae	Agelenidae	Agelenopsis	aperta	NA	5	4	1	wolb	US_CO	CO6_Sedalia_Co	39.43	-104.95	2000-2003	NA	Baldo08	8.7	810.4	29.9	-10.7	BSk
arachnida	Araneae	Agelenidae	Agelenopsis	aperta	NA	2	2	1	wolb	US_NM	NM11_Deming_NM	32.27	-107.75	2000-2003	NA	Baldo08	15.5	760.8	34.8	-3.8	BWk
arachnida	Araneae	Agelenidae	Agelenopsis	aperta	NA	4	3	1	wolb	US_OK	OK_Foss_Lake_SP_OK	35.5	-99.17	2000-2003	NA	Baldo08	15.3	899.9	35.1	-4.7	Cfa
arachnida	Araneae	Agelenidae	Agelenopsis	aperta	NA	14	10	1	wolb	US_TX	TX8_4_Just_outside_Big_Bend_NP_TX	29.65	-103.08	NA	NA	Baldo08	20.1	701.4	36.4	0.8	BSh
arachnida	Araneae	Agelenidae	Agelenopsis	aperta	NA	10	9	1	wolb	US_TX	TX7_Palo_Duro_Canyon_SP_TX	34.96	-101.67	2000-2003	NA	Baldo08	14.6	832.5	33.8	-5.5	BSk
arachnida	Araneae	Agelenidae	Agelenopsis	aperta	NA	8	2	1	wolb	US_TX	TX6_San_Angelo_TX	31.53	-100.54	2000-2003	NA	Baldo08	18.1	760.6	35.1	-0.8	BSk
arachnida	Araneae	Agelenidae	Agelenopsis	aperta	NA	6	6	1	wolb	US_TX	TX5_Balmorhea_TX	30.97	-103.72	2000-2003	NA	Baldo08	17.8	702.6	35.5	-1.1	BSk
arachnida	Araneae	Agelenidae	Agelenopsis	aperta	NA	5	4	1	wolb	US_TX	TX1_Hye_TX	30.27	98.34	NA	NA	Baldo08	1.1	601.9	14.7	-16	Dwc
arachnida	Araneae	Agelenidae	Agelenopsis	aperta	NA	6	3	1	wolb	US_UT	UT2_Springdale_UT	37.18	-112.99	2000-2003	NA	Baldo08	13.6	812.4	34.9	-4.3	BSk
arachnida	Araneae	Agelenidae	Agelenopsis	aperta	NA	20	0	1	card	US_TN	approx	35.645	-84.31	2005	NA	Duron08	14	777.3	30.9	-3.4	Cfa
arachnida	Araneae	Agelenidae	Agelenopsis	aperta	NA	20	0	1	wolb	US_TN	approx	35.645	-84.31	2005	NA	Duron08	14	777.3	30.9	-3.4	Cfa
arachnida	Araneae	Agelenidae	Agelenopsis	emertoni	NA	1	1	1	wolb	US_OK	OK_Foss_Lake_SP_OK	35.5	-99.17	NA	NA	Baldo08	15.3	899.9	35.1	-4.7	Cfa
arachnida	Araneae	Agelenidae	Agelenopsis	emertoni	NA	1	1	1	wolb	US_TN	TN2_Loudon_TN	35.73	-84.31	NA	NA	Baldo08	14.1	782.1	31	-3.4	Cfa
arachnida	Araneae	Agelenidae	Agelenopsis	emertoni	NA	1	0	1	wolb	US_TX	TX2_Dallas_Fort_Worth_TX	32.77	-96.78	NA	NA	Baldo08	18.7	790	35.5	0.9	Cfa
arachnida	Araneae	Agelenidae	Agelenopsis	longistyla	NA	3	3	1	wolb	US_NM	NM2_Cimarron_Canyon_NM	36.51	-104.91	NA	NA	Baldo08	8.9	759.5	28.9	-10.7	BSk
arachnida	Araneae	Agelenidae	Agelenopsis	longistyla	NA	1	1	1	wolb	US_NM	NM5_Galisteo_NM	35.4	-105.9	NA	NA	Baldo08	10.6	803.9	31.1	-8.5	BSk
arachnida	Araneae	Agelenidae	Agelenopsis	naevia	NA	2	2	1	wolb	US_TN	TN2_Loudon_TN	35.73	-84.31	NA	NA	Baldo08	14.1	782.1	31	-3.4	Cfa
arachnida	Araneae	Agelenidae	Agelenopsis	naevia	NA	1	1	1	wolb	US_TX	TX2_Dallas_Fort_Worth_TX	32.77	-96.78	NA	NA	Baldo08	18.7	790	35.5	0.9	Cfa
arachnida	Araneae	Agelenidae	Agelenopsis	oklahoma	NA	2	2	1	wolb	US_CO	CO3_Colorado_River_SP_Co	39.05	-108.55	NA	NA	Baldo08	11.4	957.9	34.1	-9.4	BSk
arachnida	Araneae	Agelenidae	Agelenopsis	oklahoma	NA	1	0	1	wolb	US_CO	CO1_Trinidad_CO	37.17	-104.51	NA	NA	Baldo08	9.9	777	29.6	-8.8	Cfb
arachnida	Araneae	Agelenidae	Agelenopsis	oklahoma	NA	1	1	1	wolb	US_KS	KS1_Meade_SP_Kansas	37.17	-100.45	NA	NA	Baldo08	13.2	934.1	34.5	-8.1	BSk
arachnida	Araneae	Agelenidae	Agelenopsis	oklahoma	NA	1	1	1	wolb	US_OK	OK_Foss_Lake_SP_OK	35.5	-99.17	NA	NA	Baldo08	15.3	899.9	35.1	-4.7	Cfa
arachnida	Araneae	Agelenidae	Agelenopsis	oklahoma	NA	1	0	1	wolb	US_TX	TX3_Lake_Arrowhead_SP_TX	32.77	-98.37	NA	NA	Baldo08	17.8	796.6	35.6	-1.1	Cfa
arachnida	Araneae	Agelenidae	Agelenopsis	pensylvanica	NA	1	1	1	wolb	US_CO	CO2_Barber_Ponds_SP_CO	40.17	-105.01	NA	NA	Baldo08	9.6	864.1	31.2	-10.3	BSk
arachnida	Araneae	Agelenidae	Agelenopsis	pensylvanica	NA	1	1	1	wolb	US_KS	KS2_Ellsworth_KS	39.0997	-94.5786	NA	NA	Baldo08	12.8	974	31.8	-7.1	Cfa
arachnida	Araneae	Agelenidae	Agelenopsis	pensylvanica	NA	1	1	1	wolb	US_OK	OK_Foss_Lake_SP_OK	35.5	-99.17	NA	NA	Baldo08	15.3	899.9	35.1	-4.7	Cfa
arachnida	Araneae	Agelenidae	Agelenopsis	pensylvanica	NA	2	2	1	wolb	US_TN	TN1_Knoxville_TN	35.99	-83.9	NA	NA	Baldo08	14.2	790.7	30.8	-3	Cfa
arachnida	Araneae	Agelenidae	Agelenopsis	spatula	NA	1	1	1	wolb	US_OK	OK_Foss_Lake_SP_OK	35.5	-99.17	NA	NA	Baldo08	15.3	899.9	35.1	-4.7	Cfa
arachnida	Araneae	Agelenidae	Agelenopsis	spatula	NA	3	1	1	wolb	US_TX	TX4_Caprock_Canyons_TX	34.4	-101.1	NA	NA	Baldo08	14.8	834.1	33.9	-5.3	BSk
arachnida	Araneae	Agelenidae	Agelenopsis	spatula	NA	1	0	1	wolb	US_TX	TX4_Caprock_Canyons_SP_TX	34.4	-101.1	NA	NA	Baldo08	14.8	834.1	33.9	-5.3	BSk
arachnida	Araneae	Agelenidae	Agelenopsis	utahana	NA	1	0	1	wolb	US_NH	NH1_Lincoln_NH	44.05	-71.67	NA	NA	Baldo08	5.2	979.7	25.6	-15.5	Dfb
arachnida	Araneae	Agelenidae	Agelenopsis	utahana	NA	1	0	1	wolb	US_NH	NH2_White_Mtns_NH	44.2	-71.3	NA	NA	Baldo08	2.6	941.9	21	-16.8	Dfc
arachnida	Araneae	Agelenidae	Agelenopsis	utahana	NA	1	0	1	wolb	US_NH	NH3_Manadnock_SP_NH	42.83	-72.06	NA	NA	Baldo08	6.7	928.8	26.3	-12.7	Dfb
arachnida	Araneae	Agelenidae	Agelenopsis	utahana	NA	4	2	1	wolb	US_UT	UT1_Wasatch_Mtn_UT	40.55	-111.49	NA	NA	Baldo08	5.1	813.4	26.9	-12.2	Dfb
arachnida	Araneae	Agelenidae	Barronopsis	texana	NA	1	1	1	wolb	US_FL	FL1_Silver_Springs_FL	29.21	-82.05	NA	NA	Baldo08	20.8	504	33	6.4	Cfa
arachnida	Araneae	Agelenidae	Barronopsis	texana	NA	1	1	1	wolb	US_TN	TN1_Knoxville_TN	35.99	-83.9	NA	NA	Baldo08	14.2	790.7	30.8	-3	Cfa
arachnida	Araneae	Agelenidae	Tegenaria	duellica	NA	4	1	1	wolb	UK	approx_SE_England	51.6517	-0.242041	2001-2004	NA	Goodacre06	9.9	485.9	21.9	0.5	Cfb
arachnida	Araneae	Agelenidae	Tegenaria	duellica	NA	4	4	1	card	UK	Norwich	52.6356	1.25426	NA	NA	Martin09	10.2	487.6	21	0.7	Cfb
arachnida	Araneae	Amaurobiidae	Amaurobius	fenestralis	NA	16	0	1	card	France	Montpellier	43.6	3.83906	2006	NA	Duron08	13.8	576.6	28.4	1.4	Csb
arachnida	Araneae	Amaurobiidae	Amaurobius	fenestralis	NA	16	0	1	wolb	France	Montpellier	43.6	3.83906	2006	NA	Duron08	13.8	576.6	28.4	1.4	Csb
arachnida	Araneae	Araneidae	Araneus	alternidens	NA	30	8	1	wolb	China	approx	30.5729	114.351	2008-2012	NA	Yan15	17.3	892.6	33.5	0.5	Cfa
arachnida	Araneae	Araneidae	Araneus	diadematus	NA	20	0	1	card	Belgium	Beerse	51.3167	4.79372	2005	NA	Duron08	9.8	544.8	21.8	-0.3	Cfb
arachnida	Araneae	Araneidae	Araneus	diadematus	NA	20	0	1	wolb	Belgium	Beerse	51.3167	4.79372	2005	NA	Duron08	9.8	544.8	21.8	-0.3	Cfb
arachnida	Araneae	Araneidae	Araneus	diadematus	NA	8	0	1	card	UK	London	51.5	-0.242041	2006	NA	Duron08	10.7	477.9	22.8	1.5	Cfb
arachnida	Araneae	Araneidae	Araneus	diadematus	NA	8	0	1	wolb	UK	London	51.5	-0.242041	2006	NA	Duron08	10.7	477.9	22.8	1.5	Cfb
arachnida	Araneae	Araneidae	Araneus	diadematus	NA	5	4	1	wolb	UK	approx_SE_England	51.6517	-0.242041	2001-2004	NA	Goodacre06	9.9	485.9	21.9	0.5	Cfb
arachnida	Araneae	Araneidae	Araneus	diadematus	NA	5	2	1	card	UK	Norwich	52.6356	1.25426	NA	NA	Martin09	10.2	487.6	21	0.7	Cfb
arachnida	Araneae	Araneidae	Araneus	mitificus	NA	30	0	1	wolb	China_Hubei	Wuhan_Hubei	30.5954	114.16	2006-2008	Mar-Apr	Wang10	17	884.2	33	-0.1	Cfa
arachnida	Araneae	Araneidae	Araneus	sp.	NA	1	0	1	wolb	US_IN	WoodnrBloomington	39.1667	-86.4833	1994-1998	Aug-Nov	Werren00	11.5	904.9	29.9	-7.1	Cfa
arachnida	Araneae	Araneidae	Araneus	ventricosus	NA	30	20	1	wolb	China_Hubei	Wuhan_Hubei	30.5954	114.16	2006-2008	Mar-Apr	Wang10	17	884.2	33	-0.1	Cfa
arachnida	Araneae	Araneidae	Araneus	ventricosus	NA	30	0	1	wolb	China	approx	30.5729	114.351	2008-2012	NA	Yan15	17.3	892.6	33.5	0.5	Cfa
arachnida	Araneae	Araneidae	Araneus	ventricosus	NA	2	0	1	wolb	China_Hubei	Huazhong_Agricultural_University_Wuhan_Hubei_Province	30.4719	114.351	2007-2008	Nov-Oct	Yun11	17.2	890.3	33.6	0.5	Cfa
arachnida	Araneae	Araneidae	Argiope	amoena	NA	30	0	1	wolb	China_Hubei	Wuhan_Hubei	30.5954	114.16	2006-2008	Mar-Apr	Wang10	17	884.2	33	-0.1	Cfa
arachnida	Araneae	Araneidae	Argiope	amonea	NA	30	0	1	wolb	China	approx	30.5729	114.351	2008-2012	NA	Yan15	17.3	892.6	33.5	0.5	Cfa
arachnida	Araneae	Araneidae	Argiope	bruennichi	NA	20	0	1	card	Germany	Hamburg	53.55	9.7874	2005	NA	Duron08	8.4	615.7	22	-2.6	Cfb
arachnida	Araneae	Araneidae	Argiope	bruennichi	NA	20	0	1	wolb	Germany	Hamburg	53.55	9.7874	2005	NA	Duron08	8.4	615.7	22	-2.6	Cfb
arachnida	Araneae	Araneidae	Argiope	bruennichi	NA	15	0	1	wolb	China_Hubei	Huazhong_Agricultural_University_Wuhan_Hubei_Province	30.4719	114.351	2007-2008	Nov-Oct	Yun11	17.2	890.3	33.6	0.5	Cfa
arachnida	Araneae	Araneidae	Argiope	lobota	NA	9	0	1	card	Israel	approx	32.721	35.41	NA	NA	Duron08	20.3	564.2	33.1	8.2	Csa
arachnida	Araneae	Araneidae	Argiope	lobota	NA	9	0	1	wolb	Israel	approx	32.721	35.41	NA	NA	Duron08	20.3	564.2	33.1	8.2	Csa
arachnida	Araneae	Araneidae	Argiope	lobota	NA	7	0	1	card	Spain	approx	41.3987	-3.76694	2005	NA	Duron08	10.2	617.1	26.7	-1.6	Csa
arachnida	Araneae	Araneidae	Argiope	lobota	NA	7	0	1	wolb	Spain	approx	41.3987	-3.76694	2005	NA	Duron08	10.2	617.1	26.7	-1.6	Csa
arachnida	Araneae	Araneidae	Cyclosa	conica	NA	20	8	1	card	Germany	Berlin	52.5163	13.2857	2004	NA	Duron08	9	689.6	23.8	-3.3	Cfb
arachnida	Araneae	Araneidae	Cyclosa	conica	NA	20	0	1	wolb	Germany	Berlin	52.5163	13.2857	2004	NA	Duron08	9	689.6	23.8	-3.3	Cfb
arachnida	Araneae	Araneidae	Eriophora	fuliginea	NA	2	0	1	wolb	Panama	BarroColoradoIsland_Gamboa_PanamaCity_CerroCampana	9	-79.7	1993-1994	Aug-Nov	Werren95	26.5	57	31.9	22	Am
arachnida	Araneae	Araneidae	Eriovixia	cavaleriei	NA	30	8	1	wolb	China_Hubei	Wuhan_Hubei	30.5954	114.16	2006-2008	Mar-Apr	Wang10	17	884.2	33	-0.1	Cfa
arachnida	Araneae	Araneidae	Larinia	argiopiformis	NA	30	12	1	wolb	China_Hubei	Wuhan_Hubei	30.5954	114.16	2006-2008	Mar-Apr	Wang10	17	884.2	33	-0.1	Cfa
arachnida	Araneae	Araneidae	Larinia	argiopiformis	NA	1	0	1	wolb	China_Hubei	Huazhong_Agricultural_University_Wuhan_Hubei_Province	30.4719	114.351	2007-2008	Nov-Oct	Yun11	17.2	890.3	33.6	0.5	Cfa
arachnida	Araneae	Araneidae	Larinioides	cornutus	NA	20	0	1	card	UK	London	51.5	-0.242041	2006	NA	Duron08	10.7	477.9	22.8	1.5	Cfb
arachnida	Araneae	Araneidae	Larinioides	cornutus	NA	20	0	1	wolb	UK	London	51.5	-0.242041	2006	NA	Duron08	10.7	477.9	22.8	1.5	Cfb
arachnida	Araneae	Araneidae	Larinioides	cornutus	NA	30	0	1	wolb	China_Hubei	Wuhan_Hubei	30.5954	114.16	2006-2008	Mar-Apr	Wang10	17	884.2	33	-0.1	Cfa
arachnida	Araneae	Araneidae	Larinioides	cornutus	NA	30	0	1	wolb	China	approx	30.5729	114.351	2008-2012	NA	Yan15	17.3	892.6	33.5	0.5	Cfa
arachnida	Araneae	Araneidae	Larinioides	cornutus	NA	15	0	1	wolb	China_Hubei	Huazhong_Agricultural_University_Wuhan_Hubei_Province	30.4719	114.351	2007-2008	Nov-Oct	Yun11	17.2	890.3	33.6	0.5	Cfa
arachnida	Araneae	Araneidae	Larinioides	sclopetarius	NA	20	0	1	card	Germany	Berlin	52.5163	13.2857	2004	NA	Duron08	9	689.6	23.8	-3.3	Cfb
arachnida	Araneae	Araneidae	Larinioides	sclopetarius	NA	20	0	1	wolb	Germany	Berlin	52.5163	13.2857	2004	NA	Duron08	9	689.6	23.8	-3.3	Cfb
arachnida	Araneae	Araneidae	Micrathena	gracillis	NA	1	0	1	wolb	US_IN	WoodnrBloomington	39.1667	-86.4833	1994-1998	Aug-Nov	Werren00	11.5	904.9	29.9	-7.1	Cfa
arachnida	Araneae	Araneidae	Neoscona	doenitzi	NA	11	0	1	wolb	China_Hubei	Huazhong_Agricultural_University_Wuhan_Hubei_Province	30.4719	114.351	2007-2008	Nov-Oct	Yun11	17.2	890.3	33.6	0.5	Cfa
arachnida	Araneae	Araneidae	Unid.	sp.	NA	1	1	1	card	Panama	Fort_Sherman_Colon_Province	9.36485	-79.9615	NA	NA	Chang10	26.5	53.5	30.5	22.8	Am
arachnida	Araneae	Araneidae	Unid.	sp.	NA	1	0	1	wolb	Panama	BarroColoradoIsland_Gamboa_PanamaCity_CerroCampana	9	-79.7	1993-1994	Aug-Nov	Werren95	26.5	57	31.9	22	Am
arachnida	Araneae	Araneidae	Zygiella	x-notata	NA	4	1	1	wolb	UK	approx_SE_England	51.6517	-0.242041	2001-2004	NA	Goodacre06	9.9	485.9	21.9	0.5	Cfb
arachnida	Araneae	Araneidae	Zygiella	x-notata	NA	4	4	1	card	UK	Norwich	52.6356	1.25426	NA	NA	Martin09	10.2	487.6	21	0.7	Cfb
arachnida	Araneae	Clubionidae	Cheiracanthium	erraticum	NA	2	0	1	wolb	UK	approx_SE_England	51.6517	-0.242041	2001-2004	NA	Goodacre06	9.9	485.9	21.9	0.5	Cfb
arachnida	Araneae	Clubionidae	Clubiona	brevipes	NA	2	0	1	wolb	UK	approx_SE_England	51.6517	-0.242041	2001-2004	NA	Goodacre06	9.9	485.9	21.9	0.5	Cfb
arachnida	Araneae	Clubionidae	Clubiona	comta	NA	3	0	1	wolb	UK	approx_SE_England	51.6517	-0.242041	2001-2004	NA	Goodacre06	9.9	485.9	21.9	0.5	Cfb
arachnida	Araneae	Clubionidae	Clubiona	corticalis	NA	1	0	1	wolb	UK	approx_SE_England	51.6517	-0.242041	2001-2004	NA	Goodacre06	9.9	485.9	21.9	0.5	Cfb
arachnida	Araneae	Clubionidae	Clubiona	deletrix	NA	30	0	1	wolb	China	approx	30.5729	114.351	2008-2012	NA	Yan15	17.3	892.6	33.5	0.5	Cfa
arachnida	Araneae	Clubionidae	Clubiona	diversa	NA	1	0	1	wolb	UK	approx_SE_England	51.6517	-0.242041	2001-2004	NA	Goodacre06	9.9	485.9	21.9	0.5	Cfb
arachnida	Araneae	Clubionidae	Clubiona	hummedi	NA	2	0	1	wolb	China_Hubei	Huazhong_Agricultural_University_Wuhan_Hubei_Province	30.4719	114.351	2007-2008	Nov-Oct	Yun11	17.2	890.3	33.6	0.5	Cfa
arachnida	Araneae	Clubionidae	Clubiona	japonicola	NA	30	0	1	wolb	China_Hubei	Wuhan_Hubei	30.5954	114.16	2006-2008	Mar-Apr	Wang10	17	884.2	33	-0.1	Cfa
arachnida	Araneae	Clubionidae	Clubiona	japonicola	NA	30	0	1	wolb	China	approx	30.5729	114.351	2008-2012	NA	Yan15	17.3	892.6	33.5	0.5	Cfa
arachnida	Araneae	Clubionidae	Clubiona	lutescens	NA	1	0	1	wolb	UK	approx_SE_England	51.6517	-0.242041	2001-2004	NA	Goodacre06	9.9	485.9	21.9	0.5	Cfb
arachnida	Araneae	Clubionidae	Clubiona	neglecta	NA	1	0	1	wolb	UK	approx_SE_England	51.6517	-0.242041	2001-2004	NA	Goodacre06	9.9	485.9	21.9	0.5	Cfb
arachnida	Araneae	Clubionidae	Clubiona	norvegicus	NA	1	0	1	wolb	UK	approx_SE_England	51.6517	-0.242041	2001-2004	NA	Goodacre06	9.9	485.9	21.9	0.5	Cfb
arachnida	Araneae	Clubionidae	Clubiona	pallidula	NA	2	0	1	wolb	UK	approx_SE_England	51.6517	-0.242041	2001-2004	NA	Goodacre06	9.9	485.9	21.9	0.5	Cfb
arachnida	Araneae	Clubionidae	Clubiona	phragmitis	NA	3	0	1	wolb	UK	approx_SE_England	51.6517	-0.242041	2001-2004	NA	Goodacre06	9.9	485.9	21.9	0.5	Cfb
arachnida	Araneae	Clubionidae	Clubiona	pseudoneglecta	NA	1	0	1	wolb	UK	approx_SE_England	51.6517	-0.242041	2001-2004	NA	Goodacre06	9.9	485.9	21.9	0.5	Cfb
arachnida	Araneae	Clubionidae	Clubiona	reclusa	NA	2	0	1	wolb	UK	approx_SE_England	51.6517	-0.242041	2001-2004	NA	Goodacre06	9.9	485.9	21.9	0.5	Cfb
arachnida	Araneae	Clubionidae	Clubiona	rosserae	NA	1	0	1	wolb	UK	approx_SE_England	51.6517	-0.242041	2001-2004	NA	Goodacre06	9.9	485.9	21.9	0.5	Cfb
arachnida	Araneae	Clubionidae	Clubiona	stagnatilis	NA	4	0	1	wolb	UK	approx_SE_England	51.6517	-0.242041	2001-2004	NA	Goodacre06	9.9	485.9	21.9	0.5	Cfb
arachnida	Araneae	Clubionidae	Clubiona	subtilis	NA	2	0	1	wolb	UK	approx_SE_England	51.6517	-0.242041	2001-2004	NA	Goodacre06	9.9	485.9	21.9	0.5	Cfb
arachnida	Araneae	Clubionidae	Clubiona	terrestris	NA	2	0	1	wolb	UK	approx_SE_England	51.6517	-0.242041	2001-2004	NA	Goodacre06	9.9	485.9	21.9	0.5	Cfb
arachnida	Araneae	Clubionidae	Clubiona	trivialis	NA	1	0	1	wolb	UK	approx_SE_England	51.6517	-0.242041	2001-2004	NA	Goodacre06	9.9	485.9	21.9	0.5	Cfb
arachnida	Araneae	Cybaeidae	Cybaeota	nana	NA	1	1	1	card	US_CA	Sierra_County	39.6	-120.81	NA	NA	Perlman10	10.2	609.6	29.2	-2.8	Dfb
arachnida	Araneae	Cybaeidae	Cybaeota	nana	NA	1	0	1	wolb	US_CA	Sierra_County	39.6	-120.81	NA	NA	Perlman10	10.2	609.6	29.2	-2.8	Dfb
arachnida	Araneae	Cybaeidae	Cybaeus	angustiarum	NA	1	0	1	card	Czech_Republic	Moravian-Silesian_Region	49.583	17.441	NA	NA	Perlman10	8	708.1	23.2	-5.5	Cfb
arachnida	Araneae	Cybaeidae	Cybaeus	angustiarum	NA	1	0	1	wolb	Czech_Republic	Moravian-Silesian_Region	49.583	17.441	NA	NA	Perlman10	8	708.1	23.2	-5.5	Cfb
arachnida	Araneae	Cybaeidae	Cybaeus	chauliodous	NA	1	1	1	card	US_CA	Humboldt_County	40.9475	-124.506	NA	NA	Perlman10	NA	NA	NA	NA	Csb
arachnida	Araneae	Cybaeidae	Cybaeus	chauliodous	NA	1	0	1	wolb	US_CA	Humboldt_County	40.9475	-124.506	NA	NA	Perlman10	NA	NA	NA	NA	Csb
arachnida	Araneae	Cybaeidae	Cybaeus	eutypus	NA	5	5	1	card	Canada_BC	Vancouver_Island	50.4024	-128.065	NA	NA	Perlman10	NA	NA	NA	NA	Cfb
arachnida	Araneae	Cybaeidae	Cybaeus	eutypus	NA	5	5	1	wolb	Canada_BC	Vancouver_Island	50.4024	-128.065	NA	NA	Perlman10	NA	NA	NA	NA	Cfb
arachnida	Araneae	Cybaeidae	Cybaeus	gidneyi	NA	1	0	1	card	US_CA	Humboldt_County	41.4786	-124.506	NA	NA	Perlman10	NA	NA	NA	NA	Csb
arachnida	Araneae	Cybaeidae	Cybaeus	gidneyi	NA	1	0	1	wolb	US_CA	Humboldt_County	41.4786	-124.506	NA	NA	Perlman10	NA	NA	NA	NA	Csb
arachnida	Araneae	Cybaeidae	Cybaeus	giganteus	NA	1	0	1	card	US_NC	Buncombe_County	35.3604	-82.669	NA	NA	Perlman10	11.7	702	27.4	-4.9	Cfa
arachnida	Araneae	Cybaeidae	Cybaeus	giganteus	NA	1	0	1	wolb	US_NC	Buncombe_County	35.3604	-82.669	NA	NA	Perlman10	11.7	702	27.4	-4.9	Cfa
arachnida	Araneae	Cybaeidae	Cybaeus	hesper	NA	1	1	1	card	US_CA	San_Mateo_County	37.2998	-122.475	NA	NA	Perlman10	NA	NA	NA	NA	Csb
arachnida	Araneae	Cybaeidae	Cybaeus	hesper	NA	1	0	1	wolb	US_CA	San_Mateo_County	37.2998	-122.475	NA	NA	Perlman10	NA	NA	NA	NA	Csb
arachnida	Araneae	Cybaeidae	Cybaeus	morosus	NA	1	1	1	card	Canada_BC	Heakamie_River	51.0349	-124.97	NA	NA	Perlman10	6.7	608.3	21.5	-4.7	ET
arachnida	Araneae	Cybaeidae	Cybaeus	morosus	NA	1	1	1	wolb	Canada_BC	Heakamie_River	51.0349	-124.97	NA	NA	Perlman10	6.7	608.3	21.5	-4.7	ET
arachnida	Araneae	Cybaeidae	Cybaeus	multnoma	NA	1	1	1	card	US_OR	Douglas_County	43.6472	-84.8148	NA	NA	Perlman10	7.5	971.1	28.1	-11.1	Dfb
arachnida	Araneae	Cybaeidae	Cybaeus	multnoma	NA	1	1	1	wolb	US_OR	Douglas_County	43.6472	-84.8148	NA	NA	Perlman10	7.5	971.1	28.1	-11.1	Dfb
arachnida	Araneae	Cybaeidae	Cybaeus	paralypropriapus	NA	1	1	1	card	US_OR	Douglas_County	43.6472	-84.8148	NA	NA	Perlman10	7.5	971.1	28.1	-11.1	Dfb
arachnida	Araneae	Cybaeidae	Cybaeus	paralypropriapus	NA	1	0	1	wolb	US_OR	Douglas_County	43.6472	-84.8148	NA	NA	Perlman10	7.5	971.1	28.1	-11.1	Dfb
arachnida	Araneae	Cybaeidae	Cybaeus	patritus	NA	1	0	1	card	US_TN	Blount_County	35.645	-84.066	NA	NA	Perlman10	14.2	765.7	30.8	-3	Cfa
arachnida	Araneae	Cybaeidae	Cybaeus	patritus	NA	1	0	1	wolb	US_TN	Blount_County	35.645	-84.066	NA	NA	Perlman10	14.2	765.7	30.8	-3	Cfa
arachnida	Araneae	Cybaeidae	Cybaeus	penedentatus	NA	1	1	1	card	US_CA	Santa_Cruz_County	36.5964	-122.09	NA	NA	Perlman10	NA	NA	NA	NA	Csb
arachnida	Araneae	Cybaeidae	Cybaeus	penedentatus	NA	1	1	1	wolb	US_CA	Santa_Cruz_County	36.5964	-122.09	NA	NA	Perlman10	NA	NA	NA	NA	Csb
arachnida	Araneae	Cybaeidae	Cybaeus	reticulatus	NA	1	1	1	card	Canada_BC	Vancouver_Island	48.6478	-124.596	NA	NA	Perlman10	7.9	414.1	19.1	0	Cfb
arachnida	Araneae	Cybaeidae	Cybaeus	reticulatus	NA	1	0	1	wolb	Canada_BC	Vancouver_Island	48.6478	-124.596	NA	NA	Perlman10	7.9	414.1	19.1	0	Cfb
arachnida	Araneae	Cybaeidae	Cybaeus	sanbruno	NA	1	1	1	card	US_CA	San_Mateo_County	37.6943	-122.475	NA	NA	Perlman10	13.4	224.3	21.2	6.3	Csb
arachnida	Araneae	Cybaeidae	Cybaeus	sanbruno	NA	1	0	1	wolb	US_CA	San_Mateo_County	37.6943	-122.475	NA	NA	Perlman10	13.4	224.3	21.2	6.3	Csb
arachnida	Araneae	Cybaeidae	Cybaeus	shoshoneus	NA	1	0	1	card	US_WA	Spokane_County	47.8666	-117.713	NA	NA	Perlman10	8.4	806.6	29.2	-6.6	Dsb
arachnida	Araneae	Cybaeidae	Cybaeus	shoshoneus	NA	1	1	1	wolb	US_WA	Spokane_County	47.8666	-117.713	NA	NA	Perlman10	8.4	806.6	29.2	-6.6	Dsb
arachnida	Araneae	Cybaeidae	Cybaeus	signifer	NA	27	26	1	card	Canada_BC	Vancouver_Island	48.4544	-123.271	NA	NA	Perlman10	9.9	399.6	20.3	2	Csb
arachnida	Araneae	Cybaeidae	Cybaeus	signifer	NA	27	24	1	wolb	Canada_BC	Vancouver_Island	48.4544	-123.271	NA	NA	Perlman10	9.9	399.6	20.3	2	Csb
arachnida	Araneae	Cybaeidae	Cybaeus	somesbar	NA	1	1	1	card	US_CA	Siskiyou_County	41.1123	-123.144	NA	NA	Perlman10	8.1	581	27.2	-4.6	Csb
arachnida	Araneae	Cybaeidae	Cybaeus	somesbar	NA	1	0	1	wolb	US_CA	Siskiyou_County	41.1123	-123.144	NA	NA	Perlman10	8.1	581	27.2	-4.6	Csb
arachnida	Araneae	Cybaeidae	Cybaeus	tetricus	NA	1	0	1	card	Slovenia	Inner_Carniola_Region	45.7917	14.1076	NA	NA	Perlman10	9.4	656.4	23.9	-2.7	Cfb
arachnida	Araneae	Cybaeidae	Cybaeus	tetricus	NA	1	0	1	wolb	Slovenia	Inner_Carniola_Region	45.7917	14.1076	NA	NA	Perlman10	9.4	656.4	23.9	-2.7	Cfb
arachnida	Araneae	Cybaeidae	Cybaeus	thermydrinos	NA	1	0	1	card	US_CA	Kern_County	35.7333	-119.467	NA	NA	Perlman10	17.2	687.4	36.7	1.4	BWk
arachnida	Araneae	Cybaeidae	Cybaeus	thermydrinos	NA	1	0	1	wolb	US_CA	Kern_County	35.7333	-119.467	NA	NA	Perlman10	17.2	687.4	36.7	1.4	BWk
arachnida	Araneae	Cybaeidae	Cybaeus	vulpinus	NA	1	0	1	card	US_CA	Calaveras_County	38.3101	-120.789	NA	NA	Perlman10	15.1	626.3	34.7	1.5	Csa
arachnida	Araneae	Cybaeidae	Cybaeus	vulpinus	NA	1	1	1	wolb	US_CA	Calaveras_County	38.3101	-120.789	NA	NA	Perlman10	15.1	626.3	34.7	1.5	Csa
arachnida	Araneae	Cybaeidae	Cybaeus	waynei	NA	1	1	1	card	US_OR	Douglas_County	43.6472	-84.8148	NA	NA	Perlman10	7.5	971.1	28.1	-11.1	Dfb
arachnida	Araneae	Cybaeidae	Cybaeus	waynei	NA	1	0	1	wolb	US_OR	Douglas_County	43.6472	-84.8148	NA	NA	Perlman10	7.5	971.1	28.1	-11.1	Dfb
arachnida	Araneae	Dictynidae	Dictyna	calcarata	NA	1	0	1	card	US_CA	Riverside	33.953	-117.47	NA	NA	Weeks03	18	464	33.8	4.8	BSk
arachnida	Araneae	Dictynidae	Dictyna	calcarata	NA	1	0	1	wolb	US_CA	Riverside	33.953	-117.47	NA	NA	Weeks03	18	464	33.8	4.8	BSk
arachnida	Araneae	Dysderidae	Dysdera	crocata	NA	1	0	1	wolb	France	approx	43.8958	3.83906	1992-1997	NA	Bouchon98	13	592.1	28	0.7	Csb
arachnida	Araneae	Dysderidae	Dysdera	crocata	NA	2	0	1	card	France	Montpellier	43.6	3.83906	2006	NA	Duron08	13.8	576.6	28.4	1.4	Csb
arachnida	Araneae	Dysderidae	Dysdera	crocata	NA	2	0	1	wolb	France	Montpellier	43.6	3.83906	2006	NA	Duron08	13.8	576.6	28.4	1.4	Csb
arachnida	Araneae	Dysderidae	Dysdera	erythrina	NA	4	0	1	wolb	France	approx	43.8958	3.83906	1992-1997	NA	Bouchon98	13	592.1	28	0.7	Csb
arachnida	Araneae	Gnaphosidae	Drassodes	pubescens	NA	1	0	1	wolb	UK	approx_SE_England	51.6517	-0.242041	2001-2004	NA	Goodacre06	9.9	485.9	21.9	0.5	Cfb
arachnida	Araneae	Gnaphosidae	Haplodrassus	signifer	NA	1	0	1	wolb	UK	approx_SE_England	51.6517	-0.242041	2001-2004	NA	Goodacre06	9.9	485.9	21.9	0.5	Cfb
arachnida	Araneae	Gnaphosidae	Zelotes	latreillei	NA	1	0	1	wolb	UK	approx_SE_England	51.6517	-0.242041	2001-2004	NA	Goodacre06	9.9	485.9	21.9	0.5	Cfb
arachnida	Araneae	Gnaphosidae	Zelotes	pedestris	NA	1	0	1	wolb	UK	approx_SE_England	51.6517	-0.242041	2001-2004	NA	Goodacre06	9.9	485.9	21.9	0.5	Cfb
arachnida	Araneae	Gnaphosidae	Zelotes	pusillus	NA	1	0	1	wolb	UK	approx_SE_England	51.6517	-0.242041	2001-2004	NA	Goodacre06	9.9	485.9	21.9	0.5	Cfb
arachnida	Araneae	Linyphiidae	Baryphyma	trifrons	NA	1	0	1	wolb	UK	approx_SE_England	51.6517	-0.242041	2001-2004	NA	Goodacre06	9.9	485.9	21.9	0.5	Cfb
arachnida	Araneae	Linyphiidae	Bathyphantes	approximatus	NA	1	0	1	wolb	UK	approx_SE_England	51.6517	-0.242041	2001-2004	NA	Goodacre06	9.9	485.9	21.9	0.5	Cfb
arachnida	Araneae	Linyphiidae	Bathyphantes	gracilis	NA	15	3	1	wolb	UK	approx_SE_England	51.6517	-0.242041	2001-2004	NA	Goodacre06	9.9	485.9	21.9	0.5	Cfb
arachnida	Araneae	Linyphiidae	Centromerita	bicolor	NA	1	0	1	wolb	UK	approx_SE_England	51.6517	-0.242041	2001-2004	NA	Goodacre06	9.9	485.9	21.9	0.5	Cfb
arachnida	Araneae	Linyphiidae	Centromerus	dilutus	NA	1	0	1	wolb	UK	approx_SE_England	51.6517	-0.242041	2001-2004	NA	Goodacre06	9.9	485.9	21.9	0.5	Cfb
arachnida	Araneae	Linyphiidae	Diplocentria	bidentata	NA	1	0	1	wolb	UK	approx_SE_England	51.6517	-0.242041	2001-2004	NA	Goodacre06	9.9	485.9	21.9	0.5	Cfb
arachnida	Araneae	Linyphiidae	Diplocephalus	cristatus	NA	1	1	1	wolb	UK	approx_SE_England	51.6517	-0.242041	2001-2004	NA	Goodacre06	9.9	485.9	21.9	0.5	Cfb
arachnida	Araneae	Linyphiidae	Diplocephalus	latifrons	NA	1	0	1	wolb	UK	approx_SE_England	51.6517	-0.242041	2001-2004	NA	Goodacre06	9.9	485.9	21.9	0.5	Cfb
arachnida	Araneae	Linyphiidae	Diplocephalus	picinus	NA	1	0	1	wolb	UK	approx_SE_England	51.6517	-0.242041	2001-2004	NA	Goodacre06	9.9	485.9	21.9	0.5	Cfb
arachnida	Araneae	Linyphiidae	Diplostyla	concolor	NA	1	0	1	wolb	UK	approx_SE_England	51.6517	-0.242041	2001-2004	NA	Goodacre06	9.9	485.9	21.9	0.5	Cfb
arachnida	Araneae	Linyphiidae	Dismodicus	bifrons	NA	1	0	1	wolb	UK	approx_SE_England	51.6517	-0.242041	2001-2004	NA	Goodacre06	9.9	485.9	21.9	0.5	Cfb
arachnida	Araneae	Linyphiidae	Entelecara	flavipes	NA	1	1	1	wolb	UK	approx_SE_England	51.6517	-0.242041	2001-2004	NA	Goodacre06	9.9	485.9	21.9	0.5	Cfb
arachnida	Araneae	Linyphiidae	Entelecara	omissa	NA	1	0	1	wolb	UK	approx_SE_England	51.6517	-0.242041	2001-2004	NA	Goodacre06	9.9	485.9	21.9	0.5	Cfb
arachnida	Araneae	Linyphiidae	Erigone	arctica	NA	1	0	1	wolb	UK	approx_SE_England	51.6517	-0.242041	2001-2004	NA	Goodacre06	9.9	485.9	21.9	0.5	Cfb
arachnida	Araneae	Linyphiidae	Erigone	atra	NA	20	4	1	wolb	UK	approx_SE_England	51.6517	-0.242041	2001-2004	NA	Goodacre06	9.9	485.9	21.9	0.5	Cfb
arachnida	Araneae	Linyphiidae	Erigone	dentipalis	NA	18	3	1	wolb	UK	approx_SE_England	51.6517	-0.242041	2001-2004	NA	Goodacre06	9.9	485.9	21.9	0.5	Cfb
arachnida	Araneae	Linyphiidae	Erigone	longipalpis	NA	4	1	1	wolb	UK	approx_SE_England	51.6517	-0.242041	2001-2004	NA	Goodacre06	9.9	485.9	21.9	0.5	Cfb
arachnida	Araneae	Linyphiidae	Erigone	prominens	NA	30	0	1	wolb	China_Hubei	Wuhan_Hubei	30.5954	114.16	2006-2008	Mar-Apr	Wang10	17	884.2	33	-0.1	Cfa
arachnida	Araneae	Linyphiidae	Erigone	prominens	NA	30	0	1	wolb	China	approx	30.5729	114.351	2008-2012	NA	Yan15	17.3	892.6	33.5	0.5	Cfa
arachnida	Araneae	Linyphiidae	Erigone	prominens	NA	2	0	1	wolb	China_Hubei	Huazhong_Agricultural_University_Wuhan_Hubei_Province	30.4719	114.351	2007-2008	Nov-Oct	Yun11	17.2	890.3	33.6	0.5	Cfa
arachnida	Araneae	Linyphiidae	Erigone	promiscua	NA	1	1	1	wolb	UK	approx_SE_England	51.6517	-0.242041	2001-2004	NA	Goodacre06	9.9	485.9	21.9	0.5	Cfb
arachnida	Araneae	Linyphiidae	Gnathonarium	dentatum	NA	1	0	1	wolb	UK	approx_SE_England	51.6517	-0.242041	2001-2004	NA	Goodacre06	9.9	485.9	21.9	0.5	Cfb
arachnida	Araneae	Linyphiidae	Gonatium	rubellum	NA	1	0	1	wolb	UK	approx_SE_England	51.6517	-0.242041	2001-2004	NA	Goodacre06	9.9	485.9	21.9	0.5	Cfb
arachnida	Araneae	Linyphiidae	Gonatium	rubens	NA	1	1	1	wolb	UK	approx_SE_England	51.6517	-0.242041	2001-2004	NA	Goodacre06	9.9	485.9	21.9	0.5	Cfb
arachnida	Araneae	Linyphiidae	Gongylidiellum	vivum	NA	1	0	1	wolb	UK	approx_SE_England	51.6517	-0.242041	2001-2004	NA	Goodacre06	9.9	485.9	21.9	0.5	Cfb
arachnida	Araneae	Linyphiidae	Halorates	reprobus	NA	1	0	1	wolb	UK	approx_SE_England	51.6517	-0.242041	2001-2004	NA	Goodacre06	9.9	485.9	21.9	0.5	Cfb
arachnida	Araneae	Linyphiidae	Hybocoptus	decollatus	NA	1	0	1	wolb	UK	approx_SE_England	51.6517	-0.242041	2001-2004	NA	Goodacre06	9.9	485.9	21.9	0.5	Cfb
arachnida	Araneae	Linyphiidae	Hylyphantes	graminicola	NA	1	0	1	wolb	UK	approx_SE_England	51.6517	-0.242041	2001-2004	NA	Goodacre06	9.9	485.9	21.9	0.5	Cfb
arachnida	Araneae	Linyphiidae	Hylyphantes	graminicola	NA	30	0	1	wolb	China_Hubei	Wuhan_Hubei	30.5954	114.16	2006-2008	Mar-Apr	Wang10	17	884.2	33	-0.1	Cfa
arachnida	Araneae	Linyphiidae	Hylyphantes	graminicola	NA	30	16	1	wolb	China	approx	30.5729	114.351	2008-2012	NA	Yan15	17.3	892.6	33.5	0.5	Cfa
arachnida	Araneae	Linyphiidae	Hypomma	bituberculatum	NA	1	1	1	wolb	UK	approx_SE_England	51.6517	-0.242041	2001-2004	NA	Goodacre06	9.9	485.9	21.9	0.5	Cfb
arachnida	Araneae	Linyphiidae	Hypomma	cornutum	NA	1	0	1	wolb	UK	approx_SE_England	51.6517	-0.242041	2001-2004	NA	Goodacre06	9.9	485.9	21.9	0.5	Cfb
arachnida	Araneae	Linyphiidae	Lepthyphantes	ericeus	NA	1	0	1	wolb	UK	approx_SE_England	51.6517	-0.242041	2001-2004	NA	Goodacre06	9.9	485.9	21.9	0.5	Cfb
arachnida	Araneae	Linyphiidae	Lepthyphantes	flavipes	NA	1	0	1	wolb	UK	approx_SE_England	51.6517	-0.242041	2001-2004	NA	Goodacre06	9.9	485.9	21.9	0.5	Cfb
arachnida	Araneae	Linyphiidae	Lepthyphantes	mengei	NA	1	0	1	wolb	UK	approx_SE_England	51.6517	-0.242041	2001-2004	NA	Goodacre06	9.9	485.9	21.9	0.5	Cfb
arachnida	Araneae	Linyphiidae	Lepthyphantes	minutus	NA	1	1	1	wolb	UK	approx_SE_England	51.6517	-0.242041	2001-2004	NA	Goodacre06	9.9	485.9	21.9	0.5	Cfb
arachnida	Araneae	Linyphiidae	Lepthyphantes	minutus	NA	1	1	1	card	UK	Norwich	52.6356	1.25426	NA	NA	Martin09	10.2	487.6	21	0.7	Cfb
arachnida	Araneae	Linyphiidae	Lepthyphantes	tenuis	NA	20	2	1	wolb	UK	approx_SE_England	51.6517	-0.242041	2001-2004	NA	Goodacre06	9.9	485.9	21.9	0.5	Cfb
arachnida	Araneae	Linyphiidae	Lepthyphantes	zimmermani	NA	1	0	1	wolb	UK	approx_SE_England	51.6517	-0.242041	2001-2004	NA	Goodacre06	9.9	485.9	21.9	0.5	Cfb
arachnida	Araneae	Linyphiidae	Linyphia	triangularis	NA	10	5	1	card	Germany	Berlin	52.5163	13.2857	2004	NA	Duron08	9	689.6	23.8	-3.3	Cfb
arachnida	Araneae	Linyphiidae	Linyphia	triangularis	NA	9	0	1	wolb	Germany	Berlin	52.5163	13.2857	2004	NA	Duron08	9	689.6	23.8	-3.3	Cfb
arachnida	Araneae	Linyphiidae	Linyphia	triangularis	NA	9	2	1	card	UK	London	51.5	-0.242041	2006	NA	Duron08	10.7	477.9	22.8	1.5	Cfb
arachnida	Araneae	Linyphiidae	Linyphia	triangularis	NA	9	7	1	wolb	UK	London	51.5	-0.242041	2006	NA	Duron08	10.7	477.9	22.8	1.5	Cfb
arachnida	Araneae	Linyphiidae	Linyphia	triangularis	NA	8	5	1	card	UK	London	51.5	-0.242041	2006	NA	Duron08	10.7	477.9	22.8	1.5	Cfb
arachnida	Araneae	Linyphiidae	Linyphia	triangularis	NA	8	3	1	wolb	UK	London	51.5	-0.242041	2006	NA	Duron08	10.7	477.9	22.8	1.5	Cfb
arachnida	Araneae	Linyphiidae	Linyphia	triangularis	NA	1	0	1	wolb	UK	approx_SE_England	51.6517	-0.242041	2001-2004	NA	Goodacre06	9.9	485.9	21.9	0.5	Cfb
arachnida	Araneae	Linyphiidae	Macrargus	rufus	NA	1	1	1	wolb	UK	approx_SE_England	51.6517	-0.242041	2001-2004	NA	Goodacre06	9.9	485.9	21.9	0.5	Cfb
arachnida	Araneae	Linyphiidae	Megalepthyphantes	collinus	NA	1	1	1	wolb	UK	approx_SE_England	51.6517	-0.242041	2001-2004	NA	Goodacre06	9.9	485.9	21.9	0.5	Cfb
arachnida	Araneae	Linyphiidae	Meioneta	rurestris	NA	20	1	1	wolb	UK	approx_SE_England	51.6517	-0.242041	2001-2004	NA	Goodacre06	9.9	485.9	21.9	0.5	Cfb
arachnida	Araneae	Linyphiidae	Meioneta	saxatilis	NA	1	0	1	wolb	UK	approx_SE_England	51.6517	-0.242041	2001-2004	NA	Goodacre06	9.9	485.9	21.9	0.5	Cfb
arachnida	Araneae	Linyphiidae	Meioneta	simplicitarsis	NA	1	0	1	wolb	UK	approx_SE_England	51.6517	-0.242041	2001-2004	NA	Goodacre06	9.9	485.9	21.9	0.5	Cfb
arachnida	Araneae	Linyphiidae	Mermessus	fradeorum	NA	44	0	1	card	US_KY	WinterwheatattheSpindletopResearchFarminLexington	38.1272	-84.5081	2012	Feb	Curry15	12.5	856	30.2	-5.3	Cfa
arachnida	Araneae	Linyphiidae	Mermessus	fradeorum	NA	44	14	1	wolb	US_KY	WinterwheatattheSpindletopResearchFarminLexington	38.1272	-84.5081	2012	Feb	Curry15	12.5	856	30.2	-5.3	Cfa
arachnida	Araneae	Linyphiidae	Metopobactrus	prominulus	NA	1	0	1	wolb	UK	approx_SE_England	51.6517	-0.242041	2001-2004	NA	Goodacre06	9.9	485.9	21.9	0.5	Cfb
arachnida	Araneae	Linyphiidae	Micrargus	herbigadus	NA	1	0	1	wolb	UK	approx_SE_England	51.6517	-0.242041	2001-2004	NA	Goodacre06	9.9	485.9	21.9	0.5	Cfb
arachnida	Araneae	Linyphiidae	Microlinyphia	imprigra	NA	1	0	1	wolb	UK	approx_SE_England	51.6517	-0.242041	2001-2004	NA	Goodacre06	9.9	485.9	21.9	0.5	Cfb
arachnida	Araneae	Linyphiidae	Microlinyphia	pusilla	NA	1	0	1	wolb	UK	approx_SE_England	51.6517	-0.242041	2001-2004	NA	Goodacre06	9.9	485.9	21.9	0.5	Cfb
arachnida	Araneae	Linyphiidae	Microneta	viaria	NA	1	0	1	wolb	UK	approx_SE_England	51.6517	-0.242041	2001-2004	NA	Goodacre06	9.9	485.9	21.9	0.5	Cfb
arachnida	Araneae	Linyphiidae	Monocephalus	fuscipes	NA	1	0	1	wolb	UK	approx_SE_England	51.6517	-0.242041	2001-2004	NA	Goodacre06	9.9	485.9	21.9	0.5	Cfb
arachnida	Araneae	Linyphiidae	Neriene	clathrata	NA	20	0	1	card	Belgium	Beerse	51.3167	4.79372	2005	NA	Duron08	9.8	544.8	21.8	-0.3	Cfb
arachnida	Araneae	Linyphiidae	Neriene	clathrata	NA	20	0	1	wolb	Belgium	Beerse	51.3167	4.79372	2005	NA	Duron08	9.8	544.8	21.8	-0.3	Cfb
arachnida	Araneae	Linyphiidae	Neriene	clathrata	NA	1	1	1	wolb	UK	approx_SE_England	51.6517	-0.242041	2001-2004	NA	Goodacre06	9.9	485.9	21.9	0.5	Cfb
arachnida	Araneae	Linyphiidae	Neriene	japonica	NA	30	0	1	wolb	China_Hubei	Wuhan_Hubei	30.5954	114.16	2006-2008	Mar-Apr	Wang10	17	884.2	33	-0.1	Cfa
arachnida	Araneae	Linyphiidae	Neriene	japonica	NA	30	0	1	wolb	China	approx	30.5729	114.351	2008-2012	NA	Yan15	17.3	892.6	33.5	0.5	Cfa
arachnida	Araneae	Linyphiidae	Neriene	limbatinella	NA	30	0	1	wolb	China_Hubei	Wuhan_Hubei	30.5954	114.16	2006-2008	Mar-Apr	Wang10	17	884.2	33	-0.1	Cfa
arachnida	Araneae	Linyphiidae	Neriene	montana	NA	1	1	1	wolb	UK	approx_SE_England	51.6517	-0.242041	2001-2004	NA	Goodacre06	9.9	485.9	21.9	0.5	Cfb
arachnida	Araneae	Linyphiidae	Neriene	oidedicatata	NA	30	0	1	wolb	China	approx	30.5729	114.351	2008-2012	NA	Yan15	17.3	892.6	33.5	0.5	Cfa
arachnida	Araneae	Linyphiidae	Neriene	peltata	NA	1	1	1	wolb	UK	approx_SE_England	51.6517	-0.242041	2001-2004	NA	Goodacre06	9.9	485.9	21.9	0.5	Cfb
arachnida	Araneae	Linyphiidae	Neriene	radiata	NA	30	0	1	wolb	China_Hubei	Wuhan_Hubei	30.5954	114.16	2006-2008	Mar-Apr	Wang10	17	884.2	33	-0.1	Cfa
arachnida	Araneae	Linyphiidae	Oedothorax	apicatus	NA	1	1	1	wolb	UK	approx_SE_England	51.6517	-0.242041	2001-2004	NA	Goodacre06	9.9	485.9	21.9	0.5	Cfb
arachnida	Araneae	Linyphiidae	Oedothorax	fuscus	NA	12	1	1	wolb	UK	approx_SE_England	51.6517	-0.242041	2001-2004	NA	Goodacre06	9.9	485.9	21.9	0.5	Cfb
arachnida	Araneae	Linyphiidae	Oedothorax	gibbosus	NA	1	1	1	wolb	UK	approx_SE_England	51.6517	-0.242041	2001-2004	NA	Goodacre06	9.9	485.9	21.9	0.5	Cfb
arachnida	Araneae	Linyphiidae	Oedothorax	gibbosus	NA	64	64	1	card	Belgium	Walenbos	50.9321	4.89487	NA	NA	Vanthournout11	9.9	556.9	22.3	-0.6	Cfb
arachnida	Araneae	Linyphiidae	Oedothorax	gibbosus	NA	64	29	1	wolb	Belgium	Walenbos	50.9321	4.89487	NA	NA	Vanthournout11	9.9	556.9	22.3	-0.6	Cfb
arachnida	Araneae	Linyphiidae	Oedothorax	gibbosus	NA	46	46	1	card	Belgium	Damvallei	51.0534	3.8105	NA	NA	Vanthournout11	10.2	538.8	21.8	0.4	Cfb
arachnida	Araneae	Linyphiidae	Oedothorax	gibbosus	NA	46	21	1	wolb	Belgium	Damvallei	51.0534	3.8105	NA	NA	Vanthournout11	10.2	538.8	21.8	0.4	Cfb
arachnida	Araneae	Linyphiidae	Oedothorax	retusus	NA	20	12	1	wolb	UK	approx_SE_England	51.6517	-0.242041	2001-2004	NA	Goodacre06	9.9	485.9	21.9	0.5	Cfb
arachnida	Araneae	Linyphiidae	Oedothorax	retusus	NA	6	6	1	card	Belgium	Damvallei	51.0528	3.81528	2010	Summer	Vanthournout14	10.2	538.8	21.8	0.4	Cfb
arachnida	Araneae	Linyphiidae	Oedothorax	retusus	NA	6	2	1	wolb	Belgium	Damvallei	51.0528	3.81528	2010	Summer	Vanthournout14	10.2	538.8	21.8	0.4	Cfb
arachnida	Araneae	Linyphiidae	Pelecopsis	nemaralioides	NA	1	0	1	wolb	UK	approx_SE_England	51.6517	-0.242041	2001-2004	NA	Goodacre06	9.9	485.9	21.9	0.5	Cfb
arachnida	Araneae	Linyphiidae	Peponocranium	ludicrum	NA	1	1	1	wolb	UK	approx_SE_England	51.6517	-0.242041	2001-2004	NA	Goodacre06	9.9	485.9	21.9	0.5	Cfb
arachnida	Araneae	Linyphiidae	Pityohyphantes	phrygianus	NA	16	12	1	wolb	Sweden	approx	59.9189	18.1949	2001-2004	NA	Goodacre06	5.9	749.9	21.2	-6.8	Dfb
arachnida	Araneae	Linyphiidae	Pocadicnemis	juncea	NA	1	1	1	wolb	UK	approx_SE_England	51.6517	-0.242041	2001-2004	NA	Goodacre06	9.9	485.9	21.9	0.5	Cfb
arachnida	Araneae	Linyphiidae	Prosoponoides	sinensis	NA	10	1	1	wolb	China	approx	30.5729	114.351	2008-2012	NA	Yan15	17.3	892.6	33.5	0.5	Cfa
arachnida	Araneae	Linyphiidae	Savignia	frontata	NA	1	0	1	wolb	UK	approx_SE_England	51.6517	-0.242041	2001-2004	NA	Goodacre06	9.9	485.9	21.9	0.5	Cfb
arachnida	Araneae	Linyphiidae	Silometopus	ambiguus	NA	2	1	1	wolb	UK	approx_SE_England	51.6517	-0.242041	2001-2004	NA	Goodacre06	9.9	485.9	21.9	0.5	Cfb
arachnida	Araneae	Linyphiidae	Silometopus	elegans	NA	2	1	1	wolb	UK	approx_SE_England	51.6517	-0.242041	2001-2004	NA	Goodacre06	9.9	485.9	21.9	0.5	Cfb
arachnida	Araneae	Linyphiidae	Stemonyphantes	lineatus	NA	1	1	1	wolb	UK	approx_SE_England	51.6517	-0.242041	2001-2004	NA	Goodacre06	9.9	485.9	21.9	0.5	Cfb
arachnida	Araneae	Linyphiidae	Tiso	vagans	NA	1	1	1	wolb	UK	approx_SE_England	51.6517	-0.242041	2001-2004	NA	Goodacre06	9.9	485.9	21.9	0.5	Cfb
arachnida	Araneae	Linyphiidae	Trichoncus	affinis	NA	1	0	1	wolb	UK	approx_SE_England	51.6517	-0.242041	2001-2004	NA	Goodacre06	9.9	485.9	21.9	0.5	Cfb
arachnida	Araneae	Linyphiidae	Troxochrus	scabriculus	NA	2	1	1	wolb	UK	approx_SE_England	51.6517	-0.242041	2001-2004	NA	Goodacre06	9.9	485.9	21.9	0.5	Cfb
arachnida	Araneae	Linyphiidae	Ummeliata	insecticeps	NA	30	0	1	wolb	China_Hubei	Wuhan_Hubei	30.5954	114.16	2006-2008	Mar-Apr	Wang10	17	884.2	33	-0.1	Cfa
arachnida	Araneae	Linyphiidae	Ummeliata	insecticeps	NA	30	0	1	wolb	China	approx	30.5729	114.351	2008-2012	NA	Yan15	17.3	892.6	33.5	0.5	Cfa
arachnida	Araneae	Linyphiidae	Ummeliata	insecticeps	NA	20	0	1	wolb	China_Hubei	Huazhong_Agricultural_University_Wuhan_Hubei_Province	30.4719	114.351	2007-2008	Nov-Oct	Yun11	17.2	890.3	33.6	0.5	Cfa
arachnida	Araneae	Linyphiidae	Walckenaeria	acuminata	NA	2	0	1	wolb	UK	approx_SE_England	51.6517	-0.242041	2001-2004	NA	Goodacre06	9.9	485.9	21.9	0.5	Cfb
arachnida	Araneae	Linyphiidae	Walckenaeria	antica	NA	5	1	1	wolb	UK	approx_SE_England	51.6517	-0.242041	2001-2004	NA	Goodacre06	9.9	485.9	21.9	0.5	Cfb
arachnida	Araneae	Linyphiidae	Walckenaeria	atrotibialis	NA	1	0	1	wolb	UK	approx_SE_England	51.6517	-0.242041	2001-2004	NA	Goodacre06	9.9	485.9	21.9	0.5	Cfb
arachnida	Araneae	Linyphiidae	Walckenaeria	cucullata	NA	1	1	1	wolb	UK	approx_SE_England	51.6517	-0.242041	2001-2004	NA	Goodacre06	9.9	485.9	21.9	0.5	Cfb
arachnida	Araneae	Linyphiidae	Walckenaeria	cuspidata	NA	1	0	1	wolb	UK	approx_SE_England	51.6517	-0.242041	2001-2004	NA	Goodacre06	9.9	485.9	21.9	0.5	Cfb
arachnida	Araneae	Linyphiidae	Walckenaeria	dysderoides	NA	1	0	1	wolb	UK	approx_SE_England	51.6517	-0.242041	2001-2004	NA	Goodacre06	9.9	485.9	21.9	0.5	Cfb
arachnida	Araneae	Linyphiidae	Walckenaeria	obtusa	NA	1	1	1	wolb	UK	approx_SE_England	51.6517	-0.242041	2001-2004	NA	Goodacre06	9.9	485.9	21.9	0.5	Cfb
arachnida	Araneae	Linyphiidae	Walckenaeria	unicornis	NA	3	0	1	wolb	UK	approx_SE_England	51.6517	-0.242041	2001-2004	NA	Goodacre06	9.9	485.9	21.9	0.5	Cfb
arachnida	Araneae	Liocranidae	Unid.	sp.	NA	1	1	1	card	UK	Norwich	52.6356	1.25426	NA	NA	Martin09	10.2	487.6	21	0.7	Cfb
arachnida	Araneae	Lycosidae	Allocosa	alticeps	NA	17	8	1	wolb	Uruguay	coastofMarindia_DepartmentofCanelones	-34.7708	-55.8236	NA	NA	Lerette15	16.7	424.5	28.5	6.9	Cfa
arachnida	Araneae	Lycosidae	Allocosa	alticeps	NA	17	9	1	wolb	Uruguay	LomasdeSolymar_DepartmentofCanelones	-34.8131	-55.9403	NA	NA	Lerette15	16.6	426.7	28.4	6.7	Cfa
arachnida	Araneae	Lycosidae	Allocosa	brasiliensis	NA	13	0	1	wolb	Uruguay	coastofMarindia_DepartmentofCanelones	-34.7708	-55.8236	NA	NA	Lerette15	16.7	424.5	28.5	6.9	Cfa
arachnida	Araneae	Lycosidae	Allocosa	brasiliensis	NA	13	0	1	wolb	Uruguay	LomasdeSolymar_DepartmentofCanelones	-34.8131	-55.9403	NA	NA	Lerette15	16.6	426.7	28.4	6.7	Cfa
arachnida	Araneae	Lycosidae	Alopecosa	pulverulenta	NA	20	15	1	card	Switzerland	Bern	46.95	7.35977	2004-2005	NA	Duron08	8.3	625.5	22.5	-3.4	Cfb
arachnida	Araneae	Lycosidae	Alopecosa	pulverulenta	NA	20	5	1	wolb	Switzerland	Bern	46.95	7.35977	2004-2005	NA	Duron08	8.3	625.5	22.5	-3.4	Cfb
arachnida	Araneae	Lycosidae	Arcosa	kiangsiensis	NA	30	0	1	wolb	China	approx	30.5729	114.351	2008-2012	NA	Yan15	17.3	892.6	33.5	0.5	Cfa
arachnida	Araneae	Lycosidae	Arctosa	perita	NA	1	0	1	wolb	UK	approx_SE_England	51.6517	-0.242041	2001-2004	NA	Goodacre06	9.9	485.9	21.9	0.5	Cfb
arachnida	Araneae	Lycosidae	Lycosa	sp.	NA	1	0	1	wolb	US_IN	WoodnrBloomington	39.1667	-86.4833	1994-1998	Aug-Nov	Werren00	11.5	904.9	29.9	-7.1	Cfa
arachnida	Araneae	Lycosidae	Pardosa	agrestris	NA	1	0	1	wolb	Sweden	approx	59.9189	18.1949	2001-2004	NA	Goodacre06	5.9	749.9	21.2	-6.8	Dfb
arachnida	Araneae	Lycosidae	Pardosa	agricola	NA	3	0	1	wolb	Sweden	approx	59.9189	18.1949	2001-2004	NA	Goodacre06	5.9	749.9	21.2	-6.8	Dfb
arachnida	Araneae	Lycosidae	Pardosa	amentata	NA	2	0	1	wolb	Sweden	approx	59.9189	18.1949	2001-2004	NA	Goodacre06	5.9	749.9	21.2	-6.8	Dfb
arachnida	Araneae	Lycosidae	Pardosa	astrigera	NA	30	0	1	wolb	China_Hubei	Wuhan_Hubei	30.5954	114.16	2006-2008	Mar-Apr	Wang10	17	884.2	33	-0.1	Cfa
arachnida	Araneae	Lycosidae	Pardosa	astrigera	NA	30	0	1	wolb	China	approx	30.5729	114.351	2008-2012	NA	Yan15	17.3	892.6	33.5	0.5	Cfa
arachnida	Araneae	Lycosidae	Pardosa	atrata	NA	2	0	1	wolb	Sweden	approx	59.9189	18.1949	2001-2004	NA	Goodacre06	5.9	749.9	21.2	-6.8	Dfb
arachnida	Araneae	Lycosidae	Pardosa	bifasciata	NA	2	0	1	wolb	Sweden	approx	59.9189	18.1949	2001-2004	NA	Goodacre06	5.9	749.9	21.2	-6.8	Dfb
arachnida	Araneae	Lycosidae	Pardosa	fulvipes	NA	1	0	1	wolb	Sweden	approx	59.9189	18.1949	2001-2004	NA	Goodacre06	5.9	749.9	21.2	-6.8	Dfb
arachnida	Araneae	Lycosidae	Pardosa	hyperborea	NA	2	0	1	wolb	Sweden	approx	59.9189	18.1949	2001-2004	NA	Goodacre06	5.9	749.9	21.2	-6.8	Dfb
arachnida	Araneae	Lycosidae	Pardosa	laura	NA	30	0	1	wolb	China_Hubei	Wuhan_Hubei	30.5954	114.16	2006-2008	Mar-Apr	Wang10	17	884.2	33	-0.1	Cfa
arachnida	Araneae	Lycosidae	Pardosa	laura	NA	30	0	1	wolb	China	approx	30.5729	114.351	2008-2012	NA	Yan15	17.3	892.6	33.5	0.5	Cfa
arachnida	Araneae	Lycosidae	Pardosa	laura	NA	23	0	1	wolb	China_Hubei	Huazhong_Agricultural_University_Wuhan_Hubei_Province	30.4719	114.351	2007-2008	Nov-Oct	Yun11	17.2	890.3	33.6	0.5	Cfa
arachnida	Araneae	Lycosidae	Pardosa	lugubris	NA	20	0	1	card	Germany	Darmstadt	49.8706	8.58461	2005	NA	Duron08	9.8	661.5	24.6	-2.4	Cfb
arachnida	Araneae	Lycosidae	Pardosa	lugubris	NA	20	0	1	wolb	Germany	Darmstadt	49.8706	8.58461	2005	NA	Duron08	9.8	661.5	24.6	-2.4	Cfb
arachnida	Araneae	Lycosidae	Pardosa	lugubris	NA	2	0	1	wolb	Sweden	approx	59.9189	18.1949	2001-2004	NA	Goodacre06	5.9	749.9	21.2	-6.8	Dfb
arachnida	Araneae	Lycosidae	Pardosa	lugubris	NA	2	0	1	wolb	Sweden	approx	59.9189	18.1949	2001-2004	NA	Goodacre06	5.9	749.9	21.2	-6.8	Dfb
arachnida	Araneae	Lycosidae	Pardosa	monticola	NA	1	0	1	wolb	Sweden	approx	59.9189	18.1949	2001-2004	NA	Goodacre06	5.9	749.9	21.2	-6.8	Dfb
arachnida	Araneae	Lycosidae	Pardosa	monticola	NA	1	0	1	wolb	Sweden	approx	59.9189	18.1949	2001-2004	NA	Goodacre06	5.9	749.9	21.2	-6.8	Dfb
arachnida	Araneae	Lycosidae	Pardosa	nigriceps	NA	1	0	1	wolb	Sweden	approx	59.9189	18.1949	2001-2004	NA	Goodacre06	5.9	749.9	21.2	-6.8	Dfb
arachnida	Araneae	Lycosidae	Pardosa	palustris	NA	2	0	1	wolb	Sweden	approx	59.9189	18.1949	2001-2004	NA	Goodacre06	5.9	749.9	21.2	-6.8	Dfb
arachnida	Araneae	Lycosidae	Pardosa	prativaga	NA	2	0	1	wolb	Sweden	approx	59.9189	18.1949	2001-2004	NA	Goodacre06	5.9	749.9	21.2	-6.8	Dfb
arachnida	Araneae	Lycosidae	Pardosa	pseudoannulata	NA	30	0	1	wolb	China_Hubei	Wuhan_Hubei	30.5954	114.16	2006-2008	Mar-Apr	Wang10	17	884.2	33	-0.1	Cfa
arachnida	Araneae	Lycosidae	Pardosa	pseudoannulata	NA	30	0	1	wolb	China	approx	30.5729	114.351	2008-2012	NA	Yan15	17.3	892.6	33.5	0.5	Cfa
arachnida	Araneae	Lycosidae	Pardosa	pseudoannulata	NA	1	0	1	wolb	China_Hubei	Huazhong_Agricultural_University_Wuhan_Hubei_Province	30.4719	114.351	2007-2008	Nov-Oct	Yun11	17.2	890.3	33.6	0.5	Cfa
arachnida	Araneae	Lycosidae	Pardosa	pullata	NA	20	0	1	card	Switzerland	Bern	46.95	7.35977	2004-2005	NA	Duron08	8.3	625.5	22.5	-3.4	Cfb
arachnida	Araneae	Lycosidae	Pardosa	pullata	NA	20	1	1	wolb	Switzerland	Bern	46.95	7.35977	2004-2005	NA	Duron08	8.3	625.5	22.5	-3.4	Cfb
arachnida	Araneae	Lycosidae	Pardosa	pullata	NA	3	0	1	wolb	Sweden	approx	59.9189	18.1949	2001-2004	NA	Goodacre06	5.9	749.9	21.2	-6.8	Dfb
arachnida	Araneae	Lycosidae	Pardosa	purbeckensis	NA	20	0	1	card	Belgium	approx	50.8854	4.3442	2005	NA	Duron08	10.2	560.6	22.6	-0.6	Cfb
arachnida	Araneae	Lycosidae	Pardosa	purbeckensis	NA	20	0	1	wolb	Belgium	approx	50.8854	4.3442	2005	NA	Duron08	10.2	560.6	22.6	-0.6	Cfb
arachnida	Araneae	Lycosidae	Pardosa	riparia	NA	2	0	1	wolb	Sweden	approx	59.9189	18.1949	2001-2004	NA	Goodacre06	5.9	749.9	21.2	-6.8	Dfb
arachnida	Araneae	Lycosidae	Pardosa	shenkeli	NA	2	0	1	wolb	Sweden	approx	59.9189	18.1949	2001-2004	NA	Goodacre06	5.9	749.9	21.2	-6.8	Dfb
arachnida	Araneae	Lycosidae	Pardosa	sphagnicola	NA	2	0	1	wolb	Sweden	approx	59.9189	18.1949	2001-2004	NA	Goodacre06	5.9	749.9	21.2	-6.8	Dfb
arachnida	Araneae	Lycosidae	Pirata	hygrophilus	NA	1	0	1	wolb	UK	approx_SE_England	51.6517	-0.242041	2001-2004	NA	Goodacre06	9.9	485.9	21.9	0.5	Cfb
arachnida	Araneae	Lycosidae	Pirata	piraticus	NA	30	0	1	wolb	China_Hubei	Wuhan_Hubei	30.5954	114.16	2006-2008	Mar-Apr	Wang10	17	884.2	33	-0.1	Cfa
arachnida	Araneae	Lycosidae	Pirata	piratoides	NA	30	0	1	wolb	China_Hubei	Wuhan_Hubei	30.5954	114.16	2006-2008	Mar-Apr	Wang10	17	884.2	33	-0.1	Cfa
arachnida	Araneae	Lycosidae	Pirata	subpiraticus	NA	30	0	1	wolb	China_Hubei	Wuhan_Hubei	30.5954	114.16	2006-2008	Mar-Apr	Wang10	17	884.2	33	-0.1	Cfa
arachnida	Araneae	Lycosidae	Pirata	tenuisetaceus	NA	30	0	1	wolb	China_Hubei	Wuhan_Hubei	30.5954	114.16	2006-2008	Mar-Apr	Wang10	17	884.2	33	-0.1	Cfa
arachnida	Araneae	Lycosidae	Pirata	tenuisetaceus	NA	2	0	1	wolb	China_Hubei	Huazhong_Agricultural_University_Wuhan_Hubei_Province	30.4719	114.351	2007-2008	Nov-Oct	Yun11	17.2	890.3	33.6	0.5	Cfa
arachnida	Araneae	Nephilidae	Nephila	clavata	NA	30	19	1	wolb	China_Hubei	Wuhan_Hubei	30.5954	114.16	2006-2008	Mar-Apr	Wang10	17	884.2	33	-0.1	Cfa
arachnida	Araneae	Nephilidae	Nephila	clavata	NA	30	30	1	wolb	China	approx	30.5729	114.351	2008-2012	NA	Yan15	17.3	892.6	33.5	0.5	Cfa
arachnida	Araneae	Oecobiidae	Oecobius	cellariorum	NA	30	0	1	wolb	China	approx	30.5729	114.351	2008-2012	NA	Yan15	17.3	892.6	33.5	0.5	Cfa
arachnida	Araneae	Oxyopidae	Oxyopes	lineatipes	NA	30	0	1	wolb	China	approx	30.5729	114.351	2008-2012	NA	Yan15	17.3	892.6	33.5	0.5	Cfa
arachnida	Araneae	Oxyopidae	Oxyopes	sertalus	NA	30	22	1	wolb	China_Hubei	Wuhan_Hubei	30.5954	114.16	2006-2008	Mar-Apr	Wang10	17	884.2	33	-0.1	Cfa
arachnida	Araneae	Oxyopidae	Oxyopes	sertalus	NA	4	0	1	wolb	China_Hubei	Huazhong_Agricultural_University_Wuhan_Hubei_Province	30.4719	114.351	2007-2008	Nov-Oct	Yun11	17.2	890.3	33.6	0.5	Cfa
arachnida	Araneae	Philodromidae	Philodromus	spinitarsis	NA	30	0	1	wolb	China	approx	30.5729	114.351	2008-2012	NA	Yan15	17.3	892.6	33.5	0.5	Cfa
arachnida	Araneae	Pholcidae	Holocnemus	pluchei	NA	20	8	1	card	France	Montpellier	43.6	3.83906	2006	NA	Duron08	13.8	576.6	28.4	1.4	Csb
arachnida	Araneae	Pholcidae	Holocnemus	pluchei	NA	20	0	1	wolb	France	Montpellier	43.6	3.83906	2006	NA	Duron08	13.8	576.6	28.4	1.4	Csb
arachnida	Araneae	Pholcidae	Holocnemus	pluchei	NA	159	126	1	card	France	Montpellier	43.6109	3.83906	2009-2010	NA	Stefanini12	13.8	576.6	28.4	1.4	Csb
arachnida	Araneae	Pholcidae	Holocnemus	pluchei	NA	34	17	1	card	France	Faveyrolles	43.9602	2.69037	2010	NA	Stefanini12	12.7	585.7	27.7	0.7	Cfb
arachnida	Araneae	Pholcidae	Holocnemus	pluchei	NA	28	2	1	card	France	Saint_Gilles	48.1551	-1.86757	2010	NA	Stefanini12	11.2	462.6	22.6	2.1	Cfb
arachnida	Araneae	Pholcidae	Holocnemus	pluchei	NA	23	4	1	card	France	Universite_Lyon_1	45.78	4.83523	2010	NA	Stefanini12	11.6	640.8	26.9	-0.6	Cfb
arachnida	Araneae	Pholcidae	Holocnemus	pluchei	NA	21	18	1	card	France	Castelnaudary	43.3176	1.92623	2009	NA	Stefanini12	13.1	575.8	27.3	1.5	Cfb
arachnida	Araneae	Pholcidae	Holocnemus	pluchei	NA	19	3	1	card	France	Toulouse	43.6049	1.36263	2010	NA	Stefanini12	12.6	577	26.8	0.8	Cfb
arachnida	Araneae	Pholcidae	Holocnemus	pluchei	NA	18	13	1	card	France	Chateau-Renard	47.9336	2.88146	2010	NA	Stefanini12	10.9	572.1	24.6	-0.1	Cfb
arachnida	Araneae	Pholcidae	Holocnemus	pluchei	NA	17	3	1	card	France	Perpignan	42.6987	2.8694	2010	NA	Stefanini12	15.4	561	28.8	3.8	Csa
arachnida	Araneae	Pholcidae	Holocnemus	pluchei	NA	16	0	1	card	France	Cap_Breton	43.638	-1.44656	2010	NA	Stefanini12	13.7	449.7	24.5	4	Cfb
arachnida	Araneae	Pholcidae	Holocnemus	pluchei	NA	15	11	1	card	France	Valence	44.9336	4.88128	2009	NA	Stefanini12	12.3	635.7	28.1	-0.2	Cfa
arachnida	Araneae	Pholcidae	Holocnemus	pluchei	NA	14	0	1	card	France	Sari_dOrcino_Corsica	42.0607	8.81934	2010	NA	Stefanini12	13.7	508.8	25.3	4.6	Csb
arachnida	Araneae	Pholcidae	Holocnemus	pluchei	NA	12	4	1	card	France	Saint_Romain_en_Gier	45.5633	4.69776	2009	NA	Stefanini12	11.2	632.2	26.6	-1	Cfb
arachnida	Araneae	Pholcidae	Holocnemus	pluchei	NA	11	3	1	card	France	Pierrelatte	44.3779	4.65358	2010	NA	Stefanini12	13.1	626.8	28.8	0.8	Csa
arachnida	Araneae	Pholcidae	Holocnemus	pluchei	NA	10	6	1	card	France	Beziers	43.3445	3.19912	2010	NA	Stefanini12	14.6	571.2	28.9	2.6	Csa
arachnida	Araneae	Pholcidae	Holocnemus	pluchei	NA	10	3	1	card	France	Castres	43.6063	2.20971	2010	NA	Stefanini12	13.1	578.5	27.6	1.4	Cfb
arachnida	Araneae	Pholcidae	Holocnemus	pluchei	NA	10	1	1	card	France	La_Varenne	47.3142	-1.33165	2009	NA	Stefanini12	11.5	495	23.8	2	Cfb
arachnida	Araneae	Pholcidae	Holocnemus	pluchei	NA	10	1	1	card	France	Lyon_Saint_Exupery	45.7207	4.98042	2010	NA	Stefanini12	11.4	645.5	26.6	-0.9	Cfb
arachnida	Araneae	Pholcidae	Holocnemus	pluchei	NA	3	0	1	card	France	Plan_de_la_Tour	43.3397	6.51109	2010	NA	Stefanini12	13.4	520.7	25.9	2.5	Csb
arachnida	Araneae	Pholcidae	Holocnemus	pluchei	NA	10	0	1	card	Greece	Heraklion_Crete	35.3394	25.1175	2010	NA	Stefanini12	19.1	501.2	29	10	Csa
arachnida	Araneae	Pholcidae	Holocnemus	pluchei	NA	11	1	1	card	Israel	Sede_Boqer_Campus	30.8738	34.7918	2010	NA	Stefanini12	19	523.9	32.5	6.3	BSh
arachnida	Araneae	Pholcidae	Holocnemus	pluchei	NA	6	0	1	card	Jordan	Petra	30.3303	35.4422	2011	NA	Stefanini12	16.7	584	31.2	3.3	BWh
arachnida	Araneae	Pholcidae	Holocnemus	pluchei	NA	7	0	1	card	Spain	Barcelona	41.3856	2.11366	2010	NA	Stefanini12	15.9	521.3	27.6	5.9	Cfa
arachnida	Araneae	Pholcidae	Holocnemus	pluchei	NA	16	0	1	card	US_CA	Madera	36.9615	-120.144	2010	NA	Stefanini12	16.6	670	36.4	1.8	BSk
arachnida	Araneae	Pholcidae	Holocnemus	pluchei	NA	16	0	1	card	US_CA	Yosemite	37.7446	-119.692	2010	NA	Stefanini12	8.6	612.9	26.9	-4.4	Csb
arachnida	Araneae	Pholcidae	Holocnemus	pluchei	NA	12	0	1	card	US_CA	Merced	37.3029	-120.506	2010	NA	Stefanini12	16.4	644.6	35.5	2.4	BSk
arachnida	Araneae	Pholcidae	Holocnemus	pluchei	NA	2	0	1	card	US_CA	Mariposa	37.485	-119.985	2010	NA	Stefanini12	14.4	659.6	34.4	0.2	Csa
arachnida	Araneae	Pholcidae	Pholcus	crypticolens	NA	30	17	1	wolb	China_Hubei	Wuhan_Hubei	30.5954	114.16	2006-2008	Mar-Apr	Wang10	17	884.2	33	-0.1	Cfa
arachnida	Araneae	Pholcidae	Pholcus	crypticolens	NA	30	16	1	wolb	China	approx	30.5729	114.351	2008-2012	NA	Yan15	17.3	892.6	33.5	0.5	Cfa
arachnida	Araneae	Pholcidae	Pholcus	phalangioides	2005	20	0	1	card	Germany	Berlin	52.5163	13.2857	2004	NA	Duron08	9	689.6	23.8	-3.3	Cfb
arachnida	Araneae	Pholcidae	Pholcus	phalangioides	2005	20	18	1	wolb	Germany	Berlin	52.5163	13.2857	2004	NA	Duron08	9	689.6	23.8	-3.3	Cfb
arachnida	Araneae	Pholcidae	Pholcus	phalangioides	2007	20	0	1	card	UK	London	51.5	-0.242041	2006	NA	Duron08	10.7	477.9	22.8	1.5	Cfb
arachnida	Araneae	Pholcidae	Pholcus	phalangioides	2007	20	19	1	wolb	UK	London	51.5	-0.242041	2006	NA	Duron08	10.7	477.9	22.8	1.5	Cfb
arachnida	Araneae	Pholcidae	Pholcus	phalangioides	NA	1	0	1	wolb	UK	approx_SE_England	51.6517	-0.242041	2001-2004	NA	Goodacre06	9.9	485.9	21.9	0.5	Cfb
arachnida	Araneae	Pholcidae	Pholcus	phalangioides	NA	1	1	1	card	UK	Norwich	52.6356	1.25426	NA	NA	Martin09	10.2	487.6	21	0.7	Cfb
arachnida	Araneae	Pholcidae	Pholcus	phalangioides	NA	1	0	1	wolb	US_IN	WoodnrBloomington	39.1667	-86.4833	1994-1998	Aug-Nov	Werren00	11.5	904.9	29.9	-7.1	Cfa
arachnida	Araneae	Pisauridae	Dolomedes	plantarius	NA	5	0	1	wolb	UK	approx_SE_England	51.6517	-0.242041	2001-2004	NA	Goodacre06	9.9	485.9	21.9	0.5	Cfb
arachnida	Araneae	Pisauridae	Pisaura	mirabilis	NA	12	0	1	card	UK	London	51.5	-0.242041	2006	NA	Duron08	10.7	477.9	22.8	1.5	Cfb
arachnida	Araneae	Pisauridae	Pisaura	mirabilis	NA	12	0	1	wolb	UK	London	51.5	-0.242041	2006	NA	Duron08	10.7	477.9	22.8	1.5	Cfb
arachnida	Araneae	Salticidae	Evarcha	falcata	NA	20	9	1	card	Belgium	Beerse	51.3167	4.79372	2005	NA	Duron08	9.8	544.8	21.8	-0.3	Cfb
arachnida	Araneae	Salticidae	Evarcha	falcata	NA	20	0	1	wolb	Belgium	Beerse	51.3167	4.79372	2005	NA	Duron08	9.8	544.8	21.8	-0.3	Cfb
arachnida	Araneae	Salticidae	Marpiss	magister	NA	30	0	1	wolb	China	approx	30.5729	114.351	2008-2012	NA	Yan15	17.3	892.6	33.5	0.5	Cfa
arachnida	Araneae	Salticidae	Marpissa	magister	NA	30	0	1	wolb	China_Hubei	Wuhan_Hubei	30.5954	114.16	2006-2008	Mar-Apr	Wang10	17	884.2	33	-0.1	Cfa
arachnida	Araneae	Salticidae	Marpissa	magister	NA	10	0	1	wolb	China_Hubei	Huazhong_Agricultural_University_Wuhan_Hubei_Province	30.4719	114.351	2007-2008	Nov-Oct	Yun11	17.2	890.3	33.6	0.5	Cfa
arachnida	Araneae	Salticidae	Plexippus	paykulli	NA	30	0	1	wolb	China_Hubei	Wuhan_Hubei	30.5954	114.16	2006-2008	Mar-Apr	Wang10	17	884.2	33	-0.1	Cfa
arachnida	Araneae	Salticidae	Plexippus	paykuylli	NA	30	0	1	wolb	China	approx	30.5729	114.351	2008-2012	NA	Yan15	17.3	892.6	33.5	0.5	Cfa
arachnida	Araneae	Salticidae	Salticus	scenicus	NA	3	3	1	card	UK	Norwich	52.6356	1.25426	NA	NA	Martin09	10.2	487.6	21	0.7	Cfb
arachnida	Araneae	Salticidae	Unid.	sp.	NA	1	0	1	wolb	US_IN	WoodnrBloomington	39.1667	-86.4833	1994-1998	Aug-Nov	Werren00	11.5	904.9	29.9	-7.1	Cfa
arachnida	Araneae	Salticidae	Unid.	sp.	NA	1	0	1	wolb	Panama	BarroColoradoIsland_Gamboa_PanamaCity_CerroCampana	9	-79.7	1993-1994	Aug-Nov	Werren95	26.5	57	31.9	22	Am
arachnida	Araneae	Telemidae	Telema	cordata	NA	16	16	1	wolb	China_Guangxi	Xiangzhoucountry	23.9546	109.662	2013	Apr-Jul	Wang16a	21	628.8	32.7	7.6	Cfa
arachnida	Araneae	Telemidae	Telema	curcurbitina	complexsp.	15	15	1	wolb	China_Guangxi	Laibincity	22.7275	109.091	2013	Apr-Jul	Wang16a	22.1	566.5	32.4	9.5	Cfa
arachnida	Araneae	Telemidae	Telema	curcurbitina	complexsp.	13	13	1	wolb	China_Guangxi	Lingchuancountry	25.3096	110.231	2013	Apr-Jul	Wang16a	19.5	724.2	33.3	5	Cfa
arachnida	Araneae	Telemidae	Telema	curcurbitina	complexsp.	12	12	1	wolb	China_Guangxi	Linguicountry	25.2137	110.201	2013	Apr-Jul	Wang16a	19.6	723.1	33.6	5.1	Cfa
arachnida	Araneae	Telemidae	Telema	curcurbitina	complexsp.	11	11	1	wolb	China_Guangxi	Liuzhoucity	24.2297	109.411	2013	Apr-Jul	Wang16a	21	650.6	33.2	7.3	Cwa
arachnida	Araneae	Telemidae	Telema	curcurbitina	complexsp.	10	10	1	wolb	China_Guangxi	Yangshuocountry	24.9448	110.606	2013	Apr-Jul	Wang16a	17.7	688.7	30.9	3.5	Cfa
arachnida	Araneae	Telemidae	Telema	curcurbitina	complexsp.	3	3	1	wolb	China_Guangxi	Liuzhoucity	24.2297	109.411	2013	Apr-Jul	Wang16a	21	650.6	33.2	7.3	Cwa
arachnida	Araneae	Telemidae	Telema	curcurbitina	complexsp.	3	3	1	wolb	China_Guangxi	Xiangzhoucountry	23.9546	109.662	2013	Apr-Jul	Wang16a	21	628.8	32.7	7.6	Cfa
arachnida	Araneae	Telemidae	Telema	curcurbitina	complexsp.	4	4	1	wolb	China_Guizhou	Guizhoucity	25.2722	110.304	2013	Apr-Jul	Wang16a	19.5	720.5	33.3	5.1	Cfa
arachnida	Araneae	Tetragnathidae	Meta	mengei	NA	20	0	1	card	UK	London	51.5	-0.242041	2006	NA	Duron08	10.7	477.9	22.8	1.5	Cfb
arachnida	Araneae	Tetragnathidae	Meta	mengei	NA	20	10	1	wolb	UK	London	51.5	-0.242041	2006	NA	Duron08	10.7	477.9	22.8	1.5	Cfb
arachnida	Araneae	Tetragnathidae	Meta	mengei	NA	5	2	1	wolb	UK	approx_SE_England	51.6517	-0.242041	2001-2004	NA	Goodacre06	9.9	485.9	21.9	0.5	Cfb
arachnida	Araneae	Tetragnathidae	Meta	mengei	NA	6	4	1	card	UK	Norwich	52.6356	1.25426	NA	NA	Martin09	10.2	487.6	21	0.7	Cfb
arachnida	Araneae	Tetragnathidae	Meta	segmenta	NA	20	0	1	card	Germany	Berlin	52.5163	13.2857	2004	NA	Duron08	9	689.6	23.8	-3.3	Cfb
arachnida	Araneae	Tetragnathidae	Meta	segmenta	NA	20	3	1	wolb	Germany	Berlin	52.5163	13.2857	2004	NA	Duron08	9	689.6	23.8	-3.3	Cfb
arachnida	Araneae	Tetragnathidae	Pachygnatha	degeerri	NA	20	9	1	card	Switzerland	Bern	46.95	7.35977	2004-2005	NA	Duron08	8.3	625.5	22.5	-3.4	Cfb
arachnida	Araneae	Tetragnathidae	Pachygnatha	degeerri	NA	20	1	1	wolb	Switzerland	Bern	46.95	7.35977	2004-2005	NA	Duron08	8.3	625.5	22.5	-3.4	Cfb
arachnida	Araneae	Tetragnathidae	Pachygnatha	listeri	NA	20	0	1	card	Belgium	Beerse	51.3167	4.79372	2005	NA	Duron08	9.8	544.8	21.8	-0.3	Cfb
arachnida	Araneae	Tetragnathidae	Pachygnatha	listeri	NA	20	5	1	wolb	Belgium	Beerse	51.3167	4.79372	2005	NA	Duron08	9.8	544.8	21.8	-0.3	Cfb
arachnida	Araneae	Tetragnathidae	Tetragnatha	montana	NA	20	0	1	card	UK	London	51.5	-0.242041	2006	NA	Duron08	10.7	477.9	22.8	1.5	Cfb
arachnida	Araneae	Tetragnathidae	Tetragnatha	montana	NA	20	5	1	wolb	UK	London	51.5	-0.242041	2006	NA	Duron08	10.7	477.9	22.8	1.5	Cfb
arachnida	Araneae	Tetragnathidae	Tetragnatha	montana	NA	3	0	1	wolb	UK	approx_SE_England	51.6517	-0.242041	2001-2004	NA	Goodacre06	9.9	485.9	21.9	0.5	Cfb
arachnida	Araneae	Tetragnathidae	Tetragnatha	montana	NA	3	2	1	card	UK	Norwich	52.6356	1.25426	NA	NA	Martin09	10.2	487.6	21	0.7	Cfb
arachnida	Araneae	Tetragnathidae	Tetragnatha	praedonia	NA	30	0	1	wolb	China_Hubei	Wuhan_Hubei	30.5954	114.16	2006-2008	Mar-Apr	Wang10	17	884.2	33	-0.1	Cfa
arachnida	Araneae	Tetragnathidae	Tetragnatha	praedonia	NA	30	0	1	wolb	China	approx	30.5729	114.351	2008-2012	NA	Yan15	17.3	892.6	33.5	0.5	Cfa
arachnida	Araneae	Tetragnathidae	Tetragnatha	shikokiana	NA	30	0	1	wolb	China	approx	30.5729	114.351	2008-2012	NA	Yan15	17.3	892.6	33.5	0.5	Cfa
arachnida	Araneae	Tetragnathidae	Tetragnatha	sp.	NA	1	0	1	wolb	UK	approx_SE_England	51.6517	-0.242041	2001-2004	NA	Goodacre06	9.9	485.9	21.9	0.5	Cfb
arachnida	Araneae	Tetragnathidae	Tetragnatha	squamata	NA	30	0	1	wolb	China_Hubei	Wuhan_Hubei	30.5954	114.16	2006-2008	Mar-Apr	Wang10	17	884.2	33	-0.1	Cfa
arachnida	Araneae	Tetragnathidae	Tetragnatha	squamata	NA	30	0	1	wolb	China	approx	30.5729	114.351	2008-2012	NA	Yan15	17.3	892.6	33.5	0.5	Cfa
arachnida	Araneae	Tetragnathidae	Tetragnatha	vermiformis	NA	20	0	1	wolb	China_Hubei	Huazhong_Agricultural_University_Wuhan_Hubei_Province	30.4719	114.351	2007-2008	Nov-Oct	Yun11	17.2	890.3	33.6	0.5	Cfa
arachnida	Araneae	Tetragnathidae	Unid.	sp.	NA	1	1	1	card	US_HI	Olaa_Forest	19.549	-155.152	NA	NA	Chang10	19.5	108.1	25.6	13.6	Cfb
arachnida	Araneae	Theridiidae	Achaearanea	sp.	NA	1	0	1	wolb	US_IN	WoodnrBloomington	39.1667	-86.4833	1994-1998	Aug-Nov	Werren00	11.5	904.9	29.9	-7.1	Cfa
arachnida	Araneae	Theridiidae	Achaearanea	tepidariorum	NA	30	0	1	wolb	China	approx	30.5729	114.351	2008-2012	NA	Yan15	17.3	892.6	33.5	0.5	Cfa
arachnida	Araneae	Theridiidae	Coleosoma	octomaculatum	NA	30	4	1	wolb	China_Hubei	Wuhan_Hubei	30.5954	114.16	2006-2008	Mar-Apr	Wang10	17	884.2	33	-0.1	Cfa
arachnida	Araneae	Theridiidae	Coleosoma	octomaculatum	NA	30	11	1	wolb	China	approx	30.5729	114.351	2008-2012	NA	Yan15	17.3	892.6	33.5	0.5	Cfa
arachnida	Araneae	Theridiidae	Coleosoma	octomaculatum	NA	25	0	1	wolb	China_Hubei	Huazhong_Agricultural_University_Wuhan_Hubei_Province	30.4719	114.351	2007-2008	Nov-Oct	Yun11	17.2	890.3	33.6	0.5	Cfa
arachnida	Araneae	Theridiidae	Enoplognatha	ovata	NA	20	0	1	card	UK	London	51.5	-0.242041	2006	NA	Duron08	10.7	477.9	22.8	1.5	Cfb
arachnida	Araneae	Theridiidae	Enoplognatha	ovata	NA	20	1	1	wolb	UK	London	51.5	-0.242041	2006	NA	Duron08	10.7	477.9	22.8	1.5	Cfb
arachnida	Araneae	Theridiidae	Enoplognatha	ovata	NA	2	2	1	card	UK	Norwich	52.6356	1.25426	NA	NA	Martin09	10.2	487.6	21	0.7	Cfb
arachnida	Araneae	Theridiidae	Parasteatoda	tepidariorum	NA	5	0	1	wolb	Iran	Khuzestan	31.5505	47.8863	2007	Apr-Aug	Pourali09	24.4	856.1	44.3	6.1	BWh
arachnida	Araneae	Theridiidae	Parasteatoda	tepidariorum	NA	30	0	1	wolb	China_Hubei	Wuhan_Hubei	30.5954	114.16	2006-2008	Mar-Apr	Wang10	17	884.2	33	-0.1	Cfa
arachnida	Araneae	Theridiidae	Parasteatoda	tepidariorum	NA	1	0	1	wolb	US_IN	WoodnrBloomington	39.1667	-86.4833	1994-1998	Aug-Nov	Werren00	11.5	904.9	29.9	-7.1	Cfa
arachnida	Araneae	Theridiidae	Theridion	sp.	NA	2	2	1	wolb	UK	approx_SE_England	51.6517	-0.242041	2001-2004	NA	Goodacre06	9.9	485.9	21.9	0.5	Cfb
arachnida	Araneae	Theridiidae	Tidarren	sp.	NA	1	0	1	wolb	US_IN	WoodnrBloomington	39.1667	-86.4833	1994-1998	Aug-Nov	Werren00	11.5	904.9	29.9	-7.1	Cfa
arachnida	Araneae	Theridiidae	Unid.	sp.	NA	1	1	1	card	Ghana	Cape_Three_Points	4.74178	-2.09401	NA	NA	Chang10	26.1	96.3	31.1	21.8	Af
arachnida	Araneae	Thomisidae	Ebrechtella	tricuspidatus	NA	30	0	1	wolb	China	approx	30.5729	114.351	2008-2012	NA	Yan15	17.3	892.6	33.5	0.5	Cfa
arachnida	Araneae	Thomisidae	Misumena	sp.	NA	1	1	1	wolb	US_IN	WoodnrBloomington	39.1667	-86.4833	1994-1998	Aug-Nov	Werren00	11.5	904.9	29.9	-7.1	Cfa
arachnida	Araneae	Thomisidae	Misumenops	tricuspidatus	NA	30	0	1	wolb	China_Hubei	Wuhan_Hubei	30.5954	114.16	2006-2008	Mar-Apr	Wang10	17	884.2	33	-0.1	Cfa
arachnida	Araneae	Thomisidae	Misumenops	tricuspidatus	NA	41	0	1	wolb	China_Hubei	Huazhong_Agricultural_University_Wuhan_Hubei_Province	30.4719	114.351	2007-2008	Nov-Oct	Yun11	17.2	890.3	33.6	0.5	Cfa
arachnida	Araneae	Thomisidae	Thomisus	labefactus	NA	30	0	1	wolb	China_Hubei	Wuhan_Hubei	30.5954	114.16	2006-2008	Mar-Apr	Wang10	17	884.2	33	-0.1	Cfa
arachnida	Araneae	Thomisidae	Xysticus	cristatus	NA	16	0	1	card	UK	Cambridge	51.88	0.0848821	2005	NA	Duron08	9.7	501.3	21.7	-0.1	Cfb
arachnida	Araneae	Thomisidae	Xysticus	cristatus	NA	16	0	1	wolb	UK	Cambridge	51.88	0.0848821	2005	NA	Duron08	9.7	501.3	21.7	-0.1	Cfb
arachnida	Araneae	Titanoecidae	Nurscia	albofasciata	NA	30	14	1	wolb	China	approx	30.5729	114.351	2008-2012	NA	Yan15	17.3	892.6	33.5	0.5	Cfa
arachnida	Araneae	Titanoecidae	Nurscia	albofasciata	NA	8	2	1	wolb	China_Hubei	Huazhong_Agricultural_University_Wuhan_Hubei_Province	30.4719	114.351	2007-2008	Nov-Oct	Yun11	17.2	890.3	33.6	0.5	Cfa
arachnida	Araneae	Uloboridae	Philoponella	alata	NA	10	0	1	wolb	China	approx	30.5729	114.351	2008-2012	NA	Yan15	17.3	892.6	33.5	0.5	Cfa
arachnida	Araneae	Urocteidae	Uroctea	lesserti	NA	30	0	1	wolb	China	approx	30.5729	114.351	2008-2012	NA	Yan15	17.3	892.6	33.5	0.5	Cfa
arachnida	Ixodida	Ixodidae	Amblyomma	americanum	NA	48	1	1	wolb	US_MD	LinkwoodWMADorchester	38.5353	-76.2106	2008	NA	Zhang11	13.6	829.4	30.6	-3	Cfa
arachnida	Ixodida	Ixodidae	Amblyomma	americanum	NA	32	0	1	wolb	US_MD	SerpentinewayMontgomeryMaryland	39.0645	-76.9728	2008	NA	Zhang11	12.5	853.1	30.4	-5	Cfa
arachnida	Ixodida	Ixodidae	Amblyomma	americanum	NA	29	2	1	wolb	US_MD	IdylwildWMACaroline	38.7271	-76.0016	2008	NA	Zhang11	13.3	828.3	30.6	-3.4	Cfa
arachnida	Ixodida	Ixodidae	Amblyomma	americanum	NA	26	2	1	wolb	US_MD	ChapmanStateParkMaryland	38.6186	-77.1182	2008	NA	Zhang11	13.2	831.6	30.3	-4	Cfa
arachnida	Ixodida	Ixodidae	Amblyomma	americanum	NA	17	0	1	wolb	US_MD	SandyPointStateParkMaryland	39.0227	-76.4093	2008	NA	Zhang11	13.3	851.2	30.6	-3.4	Cfa
arachnida	Ixodida	Ixodidae	Amblyomma	americanum	NA	16	0	1	wolb	US_MD	AssateagueStateParkWorchesterMaryland	38.2273	-75.148	2008	NA	Zhang11	13.4	781.2	29.4	-2.5	Cfa
arachnida	Ixodida	Ixodidae	Amblyomma	americanum	NA	7	0	1	wolb	US_MD	CalvertCliffsStateParkMaryland	38.397	-76.4315	2008	NA	Zhang11	13.6	826.8	30.4	-3	Cfa
arachnida	Ixodida	Ixodidae	Amblyomma	americanum	NA	5	0	1	wolb	US_MD	MillingtonWildlifeManagementAreaMaryland	39.2847	-75.7988	2008	NA	Zhang11	12.6	834.8	30.2	-4.4	Cfa
arachnida	Ixodida	Ixodidae	Amblyomma	americanum	NA	5	1	1	wolb	US_MD	St_Marys_SP	38.9811	-76.6784	2008	NA	Zhang11	12.9	842.5	30.5	-4.3	Cfa
arachnida	Ixodida	Ixodidae	Amblyomma	americanum	NA	4	0	1	wolb	US_MD	GreenwellStateParkMaryland	38.3667	-76.5235	2008	NA	Zhang11	13.8	826	30.7	-3	Cfa
arachnida	Ixodida	Ixodidae	Amblyomma	americanum	NA	3	0	1	wolb	US_MD	CedarvilleStateForestMaryland	38.6602	-76.8322	2008	NA	Zhang11	13	825.8	30	-4	Cfa
arachnida	Ixodida	Ixodidae	Amblyomma	americanum	NA	3	0	1	wolb	US_MD	ChapelPointStateParkMaryland	38.4728	-77.0288	2008	NA	Zhang11	13.4	822.2	30.3	-3.6	Cfa
arachnida	Ixodida	Ixodidae	Amblyomma	americanum	NA	1	0	1	wolb	US_MD	ElkNeckStateParkMaryland	39.477	-75.987	2008	NA	Zhang11	12.4	855.4	30.2	-4.9	Cfa
arachnida	Ixodida	Ixodidae	Amblyomma	americanum	NA	1	0	1	wolb	US_MD	TuckahoeStateParkMaryland	38.9566	-75.9449	2008	NA	Zhang11	12.9	829.4	30.6	-3.9	Cfa
arachnida	Ixodida	Ixodidae	Dermacentor	marginatus	NA	61	0	1	wolb	Hungary	approx	47.5857	18.3826	NA	NA	Hornok08	10.1	763.6	26.3	-4.5	Cfb
arachnida	Ixodida	Ixodidae	Dermacentor	marginatus	NA	25	0	1	wolb	Slovakia	Slovak_Karst_National_Park	48.95	20.5752	2007	Apr-May	Vaclav11	7.3	756.1	23.4	-8.2	Dfb
arachnida	Ixodida	Ixodidae	Dermacentor	reticulatus	NA	8	0	1	wolb	Hungary	approx	47.5857	18.3826	NA	NA	Hornok08	10.1	763.6	26.3	-4.5	Cfb
arachnida	Ixodida	Ixodidae	Dermacentor	variabilis	NA	1	0	1	wolb	US_IN	WoodnrBloomington	39.1667	-86.4833	1994-1998	Aug-Nov	Werren00	11.5	904.9	29.9	-7.1	Cfa
arachnida	Ixodida	Ixodidae	Haemaphysalis	concinna	NA	2	0	4	wolb	Hungary	approx	47.5857	18.3826	NA	NA	Hornok08	10.1	763.6	26.3	-4.5	Cfb
arachnida	Ixodida	Ixodidae	Hyalomma	excavatum	NA	1	0	1	card	NA	NA	NA	NA	NA	NA	ZchoriFein04	NA	NA	NA	NA	NA
arachnida	Ixodida	Ixodidae	Hyalomma	excavatum	NA	1	0	1	wolb	NA	NA	NA	NA	NA	NA	ZchoriFein04	NA	NA	NA	NA	NA
arachnida	Ixodida	Ixodidae	Ixodes	arboricola	NA	23	0	1	card	Belgium	De_Warande_Oostmalle	51.2984	4.72914	2010-2013	Dec-Mar	VanOosten18	9.8	546.9	21.8	-0.3	Cfb
arachnida	Ixodida	Ixodidae	Ixodes	arboricola	NA	23	0	1	wolb	Belgium	De_Warande_Oostmalle	51.2984	4.72914	2010-2013	Dec-Mar	VanOosten18	9.8	546.9	21.8	-0.3	Cfb
arachnida	Ixodida	Ixodidae	Ixodes	arboricola	NA	20	0	1	card	Belgium	De_Kolonie_Wortel	51.3994	4.82663	2010-2013	Dec-Mar	VanOosten18	9.7	547	21.7	-0.3	Cfb
arachnida	Ixodida	Ixodidae	Ixodes	arboricola	NA	20	0	1	wolb	Belgium	De_Kolonie_Wortel	51.3994	4.82663	2010-2013	Dec-Mar	VanOosten18	9.7	547	21.7	-0.3	Cfb
arachnida	Ixodida	Ixodidae	Ixodes	arboricola	NA	20	0	1	card	Belgium	Middelheim_Antwerp	51.1836	4.40723	2010-2013	Dec-Mar	VanOosten18	10.1	549.9	22.1	-0.1	Cfb
arachnida	Ixodida	Ixodidae	Ixodes	arboricola	NA	20	0	1	wolb	Belgium	Middelheim_Antwerp	51.1836	4.40723	2010-2013	Dec-Mar	VanOosten18	10.1	549.9	22.1	-0.1	Cfb
arachnida	Ixodida	Ixodidae	Ixodes	arboricola	NA	12	0	1	card	Belgium	Peerdsbos_Brasschaat	51.2786	4.48619	2010-2013	Dec-Mar	VanOosten18	10	548.5	21.9	-0.1	Cfb
arachnida	Ixodida	Ixodidae	Ixodes	arboricola	NA	12	0	1	wolb	Belgium	Peerdsbos_Brasschaat	51.2786	4.48619	2010-2013	Dec-Mar	VanOosten18	10	548.5	21.9	-0.1	Cfb
arachnida	Ixodida	Ixodidae	Ixodes	lividus	NA	5	0	1	card	UK	Lune_Valley	54.175	-2.80818	2009	Jun	Graham10	8.8	459.4	19.4	-0.1	Cfb
arachnida	Ixodida	Ixodidae	Ixodes	lividus	NA	5	0	1	wolb	UK	Lune_Valley	54.175	-2.80818	2009	Jun	Graham10	8.8	459.4	19.4	-0.1	Cfb
arachnida	Ixodida	Ixodidae	Ixodes	pacificus	NA	1	0	1	card	US_CA	Riverside	33.953	-117.47	NA	NA	Weeks03	18	464	33.8	4.8	BSk
arachnida	Ixodida	Ixodidae	Ixodes	pacificus	NA	1	0	1	wolb	US_CA	Riverside	33.953	-117.47	NA	NA	Weeks03	18	464	33.8	4.8	BSk
arachnida	Ixodida	Ixodidae	Ixodes	ricinus	1996	20	0	1	card	Switzerland	approx	46.95	8.57055	1996	NA	Duron08	5.8	591.7	18.6	-5.1	ET
arachnida	Ixodida	Ixodidae	Ixodes	ricinus	1996	20	0	1	wolb	Switzerland	approx	46.95	8.57055	1996	NA	Duron08	5.8	591.7	18.6	-5.1	ET
arachnida	Ixodida	Ixodidae	Ixodes	ricinus	NA	16	0	3	wolb	Hungary	approx	47.5857	18.3826	NA	NA	Hornok08	10.1	763.6	26.3	-4.5	Cfb
arachnida	Ixodida	Ixodidae	Ixodes	ricinus	NA	2	0	20	wolb	Hungary	approx	47.5857	18.3826	NA	NA	Hornok08	10.1	763.6	26.3	-4.5	Cfb
arachnida	Ixodida	Ixodidae	Ixodes	ricinus	NA	799	0	1	wolb	Slovakia	Slovak_Karst_National_Park	48.95	20.5752	2007	Apr-May	Vaclav11	7.3	756.1	23.4	-8.2	Dfb
arachnida	Ixodida	Ixodidae	Ixodes	uriae	2005	20	0	1	card	Norway	Hornoya	70.387	31.1501	2005	NA	Duron08	1.4	531.8	11.6	-7.8	ET
arachnida	Ixodida	Ixodidae	Ixodes	uriae	2005	20	0	1	wolb	Norway	Hornoya	70.387	31.1501	2005	NA	Duron08	1.4	531.8	11.6	-7.8	ET
arachnida	Ixodida	Ixodidae	Rhipicephalus	annulatus	NA	5	3	1	wolb	Iran	Khuzestan	31.5505	47.8863	2007	Apr-Aug	Pourali09	24.4	856.1	44.3	6.1	BWh
arachnida	Ixodida	Ixodidae	Rhipicephalus	annulatus	NA	1	0	1	card	NA	NA	NA	NA	NA	NA	ZchoriFein04	NA	NA	NA	NA	NA
arachnida	Ixodida	Ixodidae	Rhipicephalus	annulatus	NA	1	0	1	wolb	NA	NA	NA	NA	NA	NA	ZchoriFein04	NA	NA	NA	NA	NA
arachnida	Ixodida	Ixodidae	Rhipicephalus	appendiculatus	NA	1	0	1	card	NA	NA	NA	NA	NA	NA	ZchoriFein04	NA	NA	NA	NA	NA
arachnida	Ixodida	Ixodidae	Rhipicephalus	appendiculatus	NA	1	0	1	wolb	NA	NA	NA	NA	NA	NA	ZchoriFein04	NA	NA	NA	NA	NA
arachnida	Ixodida	Ixodidae	Rhipicephalus	bursa	NA	76	0	1	wolb	France	Lantabat	43.2635	-1.1672	2013	Sep	Dahmani17	12.5	495.7	24.9	1.9	Cfb
arachnida	Ixodida	Ixodidae	Rhipicephalus	evertsi	NA	12	0	1	card	Zimbabwe	approx	-16.242	29.2499	NA	NA	Duron08	21.5	278.1	32.9	9.3	Cwa
arachnida	Ixodida	Ixodidae	Rhipicephalus	evertsi	NA	12	0	1	wolb	Zimbabwe	approx	-16.242	29.2499	NA	NA	Duron08	21.5	278.1	32.9	9.3	Cwa
arachnida	Ixodida	Ixodidae	Rhipicephalus	microplus	NA	25	0	1	card	New_Caledonia	approx	-22.1333	167.095	2003	NA	Duron08	NA	NA	NA	NA	Cfa
arachnida	Ixodida	Ixodidae	Rhipicephalus	microplus	NA	25	0	1	wolb	New_Caledonia	approx	-22.1333	167.095	2003	NA	Duron08	NA	NA	NA	NA	Cfa
arachnida	Ixodida	Ixodidae	Rhipicephalus	sanguineus	NA	1	0	1	card	NA	NA	NA	NA	NA	NA	ZchoriFein04	NA	NA	NA	NA	NA
arachnida	Ixodida	Ixodidae	Rhipicephalus	sanguineus	NA	1	0	1	wolb	NA	NA	NA	NA	NA	NA	ZchoriFein04	NA	NA	NA	NA	NA
arachnida	Ixodida	Ixodidae	Rhipicephalus	zambeziensis	NA	1	0	1	card	NA	NA	NA	NA	NA	NA	ZchoriFein04	NA	NA	NA	NA	NA
arachnida	Ixodida	Ixodidae	Rhipicephalus	zambeziensis	NA	1	0	1	wolb	NA	NA	NA	NA	NA	NA	ZchoriFein04	NA	NA	NA	NA	NA
arachnida	Mesostigmata	Dermanyssidae	Dermanyssus	gallinae	NA	240	34	1	card	France	approx	43.8958	3.83906	NA	NA	DeLuna09	13	592.1	28	0.7	Csb
arachnida	Mesostigmata	Dermanyssidae	Dermanyssus	gallinae	NA	240	0	1	wolb	France	approx	43.8958	3.83906	NA	NA	DeLuna09	13	592.1	28	0.7	Csb
arachnida	Mesostigmata	Dermanyssidae	Dermanyssus	gallinae	NA	80	18	10	card	France	approx	43.8958	3.83906	NA	NA	DeLuna09	13	592.1	28	0.7	Csb
arachnida	Mesostigmata	Dermanyssidae	Dermanyssus	gallinae	NA	80	0	10	wolb	France	approx	43.8958	3.83906	NA	NA	DeLuna09	13	592.1	28	0.7	Csb
arachnida	Mesostigmata	Dermanyssidae	Dermanyssus	gallinae	NA	1	0	8	wolb	Iran	Khuzestan	31.5505	47.8863	2007	Apr-Aug	Pourali09	24.4	856.1	44.3	6.1	BWh
arachnida	Mesostigmata	Gamasidae	Gamasus	sp.	NA	2	0	1	wolb	France	approx	43.8958	3.83906	1992-1997	NA	Bouchon98	13	592.1	28	0.7	Csb
arachnida	Mesostigmata	Parasitidae	Unid.	sp.	NA	23	0	1	wolb	Thailand	Sai_Yok	14.0167	98.6836	1999-2001	NA	Sintupachee06	22.5	123.3	30.8	13.8	Am
arachnida	Mesostigmata	Parasitidae	Unid.	sp.	NA	1	0	1	wolb	Thailand	Sai_Yok	14.0167	98.6836	1999-2001	NA	Sintupachee06	22.5	123.3	30.8	13.8	Am
arachnida	Mesostigmata	Phytoseiidae	Galendromus	annectens	NA	1	0	1	card	US_CA	Riverside	33.953	-117.47	NA	NA	Weeks03	18	464	33.8	4.8	BSk
arachnida	Mesostigmata	Phytoseiidae	Galendromus	annectens	NA	1	1	1	wolb	US_CA	Riverside	33.953	-117.47	NA	NA	Weeks03	18	464	33.8	4.8	BSk
arachnida	Mesostigmata	Phytoseiidae	Galendromus	helveolus	NA	1	0	1	card	US_CA	Riverside	33.953	-117.47	NA	NA	Weeks03	18	464	33.8	4.8	BSk
arachnida	Mesostigmata	Phytoseiidae	Galendromus	helveolus	NA	1	0	1	wolb	US_CA	Riverside	33.953	-117.47	NA	NA	Weeks03	18	464	33.8	4.8	BSk
arachnida	Mesostigmata	Phytoseiidae	Mesoseiulus	longipes	NA	1	0	1	card	US_CA	Riverside	33.953	-117.47	NA	NA	Weeks03	18	464	33.8	4.8	BSk
arachnida	Mesostigmata	Phytoseiidae	Mesoseiulus	longipes	NA	1	1	1	wolb	US_CA	Riverside	33.953	-117.47	NA	NA	Weeks03	18	464	33.8	4.8	BSk
arachnida	Mesostigmata	Phytoseiidae	Metaseiulus	occidentalis	cherries	1	1	20	card	US_CA	Lodi	38.1305	-121.296	NA	NA	Hoy05	15.4	560.7	32.7	2.5	Csa
arachnida	Mesostigmata	Phytoseiidae	Metaseiulus	occidentalis	cherries	1	1	20	wolb	US_CA	Lodi	38.1305	-121.296	NA	NA	Hoy05	15.4	560.7	32.7	2.5	Csa
arachnida	Mesostigmata	Phytoseiidae	Metaseiulus	occidentalis	almonds	1	1	20	card	US_CA	Tracy	37.7414	-121.479	NA	NA	Hoy05	16	583.7	33.7	2.4	BSk
arachnida	Mesostigmata	Phytoseiidae	Metaseiulus	occidentalis	almonds	1	1	20	wolb	US_CA	Tracy	37.7414	-121.479	NA	NA	Hoy05	16	583.7	33.7	2.4	BSk
arachnida	Mesostigmata	Phytoseiidae	Metaseiulus	occidentalis	hops	1	1	20	card	US_WA	Grandview	46.2509	-119.923	NA	NA	Hoy05	11.3	761	31.5	-3.6	BSk
arachnida	Mesostigmata	Phytoseiidae	Metaseiulus	occidentalis	hops	1	1	20	wolb	US_WA	Grandview	46.2509	-119.923	NA	NA	Hoy05	11.3	761	31.5	-3.6	BSk
arachnida	Mesostigmata	Phytoseiidae	Metaseiulus	occidentalis	wine_grapes	1	1	20	card	US_WA	Prosser	46.2074	-119.783	NA	NA	Hoy05	10.4	739.4	30.2	-3.9	BSk
arachnida	Mesostigmata	Phytoseiidae	Metaseiulus	occidentalis	wine_grapes	1	1	20	wolb	US_WA	Prosser	46.2074	-119.783	NA	NA	Hoy05	10.4	739.4	30.2	-3.9	BSk
arachnida	Mesostigmata	Phytoseiidae	Metaseiulus	occidentalis	NA	1	1	1	card	US_CA	Riverside	33.953	-117.47	NA	NA	Weeks03	18	464	33.8	4.8	BSk
arachnida	Mesostigmata	Phytoseiidae	Metaseiulus	occidentalis	NA	1	1	1	wolb	US_CA	Riverside	33.953	-117.47	NA	NA	Weeks03	18	464	33.8	4.8	BSk
arachnida	Mesostigmata	Phytoseiidae	Metaseiulus	occidentalis	NA	1	1	1	card	NA	NA	NA	NA	NA	NA	ZchoriFein04	NA	NA	NA	NA	NA
arachnida	Mesostigmata	Phytoseiidae	Metaseiulus	occidentalis	NA	1	1	1	wolb	NA	NA	NA	NA	NA	NA	ZchoriFein04	NA	NA	NA	NA	NA
arachnida	Mesostigmata	Phytoseiidae	Neoseiulus	californicus	NA	1	0	1	wolb	NA	NA	NA	NA	NA	NA	ZchoriFein04	NA	NA	NA	NA	NA
arachnida	Mesostigmata	Phytoseiidae	Neoseiulus	californicus	NA	1	0	1	card	NA	NA	NA	NA	NA	NA	ZchoriFein04	NA	NA	NA	NA	NA
arachnida	Mesostigmata	Phytoseiidae	Neoseiulus	cucumeris	NA	1	0	1	card	NA	NA	NA	NA	NA	NA	ZchoriFein04	NA	NA	NA	NA	NA
arachnida	Mesostigmata	Phytoseiidae	Neoseiulus	cucumeris	NA	1	1	1	wolb	NA	NA	NA	NA	NA	NA	ZchoriFein04	NA	NA	NA	NA	NA
arachnida	Mesostigmata	Phytoseiidae	Neoseiulus	fallacis	NA	1	0	1	card	US_CA	Riverside	33.953	-117.47	NA	NA	Weeks03	18	464	33.8	4.8	BSk
arachnida	Mesostigmata	Phytoseiidae	Neoseiulus	fallacis	NA	1	0	1	wolb	US_CA	Riverside	33.953	-117.47	NA	NA	Weeks03	18	464	33.8	4.8	BSk
arachnida	Mesostigmata	Phytoseiidae	Phytoseiulus	macropilis	NA	1	0	1	card	US_CA	Riverside	33.953	-117.47	NA	NA	Weeks03	18	464	33.8	4.8	BSk
arachnida	Mesostigmata	Phytoseiidae	Phytoseiulus	macropilis	NA	1	0	1	wolb	US_CA	Riverside	33.953	-117.47	NA	NA	Weeks03	18	464	33.8	4.8	BSk
arachnida	Mesostigmata	Phytoseiidae	Phytoseiulus	persimilis	NA	1	0	5	wolb	Australia	approx	-25.22	147.2	NA	NA	Enigl05	19.4	546.1	33.6	2.8	BSh
arachnida	Mesostigmata	Phytoseiidae	Phytoseiulus	persimilis	NA	1	0	5	wolb	France	approx	43.8958	43.8958	NA	NA	Enigl05	10.1	911.8	28.6	-6.6	Dfa
arachnida	Mesostigmata	Phytoseiidae	Phytoseiulus	persimilis	NA	1	0	15	wolb	Italy	Sicily	37.891	14.381	NA	NA	Enigl05	11.9	616.9	25.5	2.1	Csa
arachnida	Mesostigmata	Phytoseiidae	Phytoseiulus	persimilis	NA	1	0	5	wolb	South_Korea	approx	36.4126	128.152	NA	NA	Enigl05	12.2	940.2	29.9	-6.9	Cwa
arachnida	Mesostigmata	Phytoseiidae	Phytoseiulus	persimilis	NA	1	0	5	wolb	Turkey	approx	36.7692	35.3466	NA	NA	Enigl05	18.7	631.9	31.9	4.8	Csa
arachnida	Mesostigmata	Phytoseiidae	Phytoseiulus	persimilis	NA	1	0	5	wolb	Turkey	approx	36.7692	35.3466	NA	NA	Enigl05	18.7	631.9	31.9	4.8	Csa
arachnida	Mesostigmata	Phytoseiidae	Phytoseiulus	persimilis	NA	1	0	15	wolb	US_OR	approx	44.0346	-119.289	NA	NA	Enigl05	5.1	711.5	26.7	-11.1	Dsb
arachnida	Mesostigmata	Phytoseiidae	Phytoseiulus	persimilis	NA	1	0	1	card	US_CA	Riverside	33.953	-117.47	NA	NA	Weeks03	18	464	33.8	4.8	BSk
arachnida	Mesostigmata	Phytoseiidae	Phytoseiulus	persimilis	NA	1	1	1	wolb	US_CA	Riverside	33.953	-117.47	NA	NA	Weeks03	18	464	33.8	4.8	BSk
arachnida	Mesostigmata	Phytoseiidae	Phytoseiulus	persimilis	NA	1	0	1	card	NA	NA	NA	NA	NA	NA	ZchoriFein04	NA	NA	NA	NA	NA
arachnida	Mesostigmata	Phytoseiidae	Phytoseiulus	persimilis	NA	1	1	1	wolb	NA	NA	NA	NA	NA	NA	ZchoriFein04	NA	NA	NA	NA	NA
arachnida	Mesostigmata	Phytoseiidae	Phytoseiulus	persimilis	NA	1	1	1	wolb	NA	NA	NA	NA	NA	NA	ZchoriFein04	NA	NA	NA	NA	NA
arachnida	Mesostigmata	Phytoseiidae	Phytoseiulus	persimilis	NA	1	0	1	card	NA	NA	NA	NA	NA	NA	ZchoriFein04	NA	NA	NA	NA	NA
arachnida	Opiliones	Caddidae	Caddo	agilis	NA	1	0	1	card	Japan	Ashizu_Tunnel_Tottori_Prefecture	35.5069	134.323	NA	NA	Chang10	13.9	804.8	30.8	-0.8	Cfa
arachnida	Opiliones	Caddidae	Caddo	agilis	NA	1	0	1	card	US_NH	Pisgah_State_Park_Cheshire_Co	42.842	-72.4111	NA	NA	Chang10	6.7	943.2	26.9	-13.5	Dfb
arachnida	Opiliones	Leiobunidae	Leiobunum	bracchiolum	NA	1	0	1	card	US_NY	Mendon_Ponds_Park_Monroe_County	43.0276	-77.5685	NA	NA	Chang10	8.5	924.8	27.6	-9.2	Dfa
arachnida	Opiliones	Leiobunidae	Leiobunum	nigropalpi	NA	1	0	1	card	Mexico	Old_Gate_Site_Sonora_Rancho_San_Bernardino	31.3179	-109.269	NA	NA	Chang10	17.3	701.1	36.4	-1.9	BSh
arachnida	Opiliones	Leiobunidae	Leiobunum	politum	NA	1	0	1	card	Mexico	Old_Gate_Site_Sonora_Rancho_San_Bernardino	31.3179	-109.269	NA	NA	Chang10	17.3	701.1	36.4	-1.9	BSh
arachnida	Opiliones	Leiobunidae	Leiobunum	politum	NA	1	0	1	card	US_NY	Genesee_Valley_Park_Monroe_County_New_York	43.1092	-77.638	NA	NA	Chang10	8.6	930.3	27.8	-9	Dfa
arachnida	Opiliones	Leiobunidae	Leiobunum	rotundum	NA	16	0	1	card	France	Feurs	45.75	4.21373	2006	NA	Duron08	10.8	614.8	25.8	-1.1	Cfb
arachnida	Opiliones	Leiobunidae	Leiobunum	rotundum	NA	16	0	1	wolb	France	Feurs	45.75	4.21373	2006	NA	Duron08	10.8	614.8	25.8	-1.1	Cfb
arachnida	Opiliones	Leiobunidae	Leiobunum	serratipalpe	NA	1	0	1	card	US_NY	Rochester_-_general_area_Monroe_County_New_York	43.1696	-77.6867	NA	NA	Chang10	8.6	929.4	27.6	-9	Dfa
arachnida	Opiliones	Leiobunidae	Leiobunum	sp.	NA	1	0	1	card	Mexico	Old_Gate_Site_Sonora_Rancho_San_Bernardino	31.3179	-109.269	NA	NA	Chang10	17.3	701.1	36.4	-1.9	BSh
arachnida	Opiliones	Leiobunidae	Leiobunum	sp.	NA	1	1	1	card	US_NY	Ellison_Park_Monroe_County	43.1492	-77.5172	NA	NA	Chang10	8.8	929.6	27.9	-8.9	Dfa
arachnida	Opiliones	Leiobunidae	Leiobunum	sp.	NA	1	0	1	card	US_NY	Genesee_Valley_Park_Monroe_County_New_York	43.1092	-77.638	NA	NA	Chang10	8.6	930.3	27.8	-9	Dfa
arachnida	Opiliones	Leiobunidae	Leiobunum	sp.	NA	1	0	1	wolb	US_IN	WoodnrBloomington	39.1667	-86.4833	1994-1998	Aug-Nov	Werren00	11.5	904.9	29.9	-7.1	Cfa
arachnida	Opiliones	Leiobunidae	Leiobunum	vittatum	NA	1	0	1	card	US_NY	Adirondacks	43.9849	-75.118	NA	NA	Chang10	4.6	989.5	24.2	-16	Dfb
arachnida	Opiliones	Leiobunidae	Leiobunum	vittatum	NA	1	1	1	card	US_NY	Genesee_Valley_Park_Monroe_County_New_York	43.1092	-77.638	NA	NA	Chang10	8.6	930.3	27.8	-9	Dfa
arachnida	Opiliones	Phalangiidae	Phalangium	opilio	NA	2	1	1	card	US_NY	Genesee_Valley_Park_Monroe_County_New_York	43.1092	-77.638	NA	NA	Chang10	8.6	930.3	27.8	-9	Dfa
arachnida	Opiliones	Phalangiidae	Rilaena	sp.	NA	1	0	1	card	Mexico	Old_Gate_Site_Sonora_Rancho_San_Bernardino	31.3179	-109.269	NA	NA	Chang10	17.3	701.1	36.4	-1.9	BSh
arachnida	Opiliones	Phalangiidae	Rilaena	sp.	NA	1	1	1	card	Mexico	Old_Gate_Site_Sonora_Rancho_San_Bernardino	31.3179	-109.269	NA	NA	Chang10	17.3	701.1	36.4	-1.9	BSh
arachnida	Opiliones	Phalangiidae	Rilaena	sp.	NA	1	0	1	card	US_NY	Genesee_Valley_Park_Monroe_County_New_York	43.1092	-77.638	NA	NA	Chang10	8.6	930.3	27.8	-9	Dfa
arachnida	Opiliones	Phalangiidae	Rilaena	sp.	NA	1	0	1	card	US_NY	Genesee_Valley_Park_Monroe_County_New_York	43.1092	-77.638	NA	NA	Chang10	8.6	930.3	27.8	-9	Dfa
arachnida	Opiliones	Phalangiidae	Rilaena	sp.	NA	1	0	1	card	US_NY	Rochester_-_general_area_Monroe_County_New_York	43.1696	-77.6867	NA	NA	Chang10	8.6	929.4	27.6	-9	Dfa
arachnida	Opiliones	Phalangiidae	Rilaena	triangularis	NA	1	1	1	card	US_NY	Genesee_Valley_Park_Monroe_County_New_York	43.1092	-77.638	NA	NA	Chang10	8.6	930.3	27.8	-9	Dfa
arachnida	Opiliones	Phalangiidae	Unid.	sp.	NA	1	1	1	card	UK	Norwich	52.6356	1.25426	NA	NA	Martin09	10.2	487.6	21	0.7	Cfb
arachnida	Opiliones	Unid.	Unid.	sp.	NA	1	0	1	wolb	US_IN	WoodnrBloomington	39.1667	-86.4833	1994-1998	Aug-Nov	Werren00	11.5	904.9	29.9	-7.1	Cfa
arachnida	Sarcoptiformes	Acaridae	Rhizoglyphus	robini	NA	1	0	1	card	NA	NA	NA	NA	NA	NA	ZchoriFein04	NA	NA	NA	NA	NA
arachnida	Sarcoptiformes	Acaridae	Rhizoglyphus	robini	NA	1	0	1	wolb	NA	NA	NA	NA	NA	NA	ZchoriFein04	NA	NA	NA	NA	NA
arachnida	Sarcoptiformes	Acaridae	Tyrophagus	putrescentiae	NA	1	0	1	card	NA	NA	NA	NA	NA	NA	ZchoriFein04	NA	NA	NA	NA	NA
arachnida	Sarcoptiformes	Acaridae	Tyrophagus	putrescentiae	NA	1	0	1	wolb	NA	NA	NA	NA	NA	NA	ZchoriFein04	NA	NA	NA	NA	NA
arachnida	Sarcoptiformes	Astigmatina	Unid.	sp.	NA	1	1	1	card	South_Korea	Sangju	36.4126	128.152	2007	Apr-Jun	Jeong09	12.2	940.2	29.9	-6.9	Cwa
arachnida	Sarcoptiformes	Astigmatina	Unid.	sp.	NA	1	0	1	wolb	South_Korea	Sangju	36.4126	128.152	2007	Apr-Jun	Jeong09	12.2	940.2	29.9	-6.9	Cwa
arachnida	Sarcoptiformes	Oppiidae	Oppiella	nova	NA	1	1	1	card	US_CA	Riverside	33.953	-117.47	NA	NA	Weeks03	18	464	33.8	4.8	BSk
arachnida	Sarcoptiformes	Oppiidae	Oppiella	nova	NA	1	1	1	wolb	US_CA	Riverside	33.953	-117.47	NA	NA	Weeks03	18	464	33.8	4.8	BSk
arachnida	Scorpiones	Euscorpiidae	Euscorpius	flavicauda	NA	1	0	1	card	France	St_Nazaire_de_Pazan	43.6439	4.10015	2006	NA	Duron08	14	583.4	28.8	1.5	Csa
arachnida	Scorpiones	Euscorpiidae	Euscorpius	flavicauda	NA	1	0	1	wolb	France	St_Nazaire_de_Pazan	43.6439	4.10015	2006	NA	Duron08	14	583.4	28.8	1.5	Csa
arachnida	Scorpiones	Scorpionidae	Opistophthalmus	ammopus	NA	1	1	1	wolb	South_Africa	Namaqualand_Northern_Cape	-29.2833	17.0833	1997-1998	NA	Baldo07	15.5	191.6	22.9	7.2	BWk
arachnida	Scorpiones	Scorpionidae	Opistophthalmus	capensis	NA	1	1	1	wolb	South_Africa	Hopefield_Western_Cape	-33.1333	18	1997-1998	NA	Baldo07	19.6	368.2	29	10.1	Csb
arachnida	Scorpiones	Scorpionidae	Opistophthalmus	chaperi	NA	1	1	1	wolb	South_Africa	Worcester_Western_Cape	-33.65	19.5333	1997-1998	NA	Baldo07	17.2	393.8	30.3	4.7	Csa
arachnida	Scorpiones	Scorpionidae	Opistophthalmus	granifrons	NA	1	1	1	wolb	South_Africa	Namaqualand_Northern_Cape	-30.3167	18.25	1997-1998	NA	Baldo07	15	402.4	28.5	3.1	BSk
arachnida	Scorpiones	Scorpionidae	Opistophthalmus	latimanus	NA	1	1	1	wolb	South_Africa	Uitenhage_Eastern_Cape	-33.7167	25.2833	1997-1998	NA	Baldo07	17.5	303.3	27.3	5.7	Cfb
arachnida	Scorpiones	Scorpionidae	Opistophthalmus	latro	NA	1	1	1	wolb	South_Africa	Hopefield_Western_Cape	-33.1333	17.9833	1997-1998	NA	Baldo07	19.6	360.3	28.7	10.2	Csb
arachnida	Scorpiones	Scorpionidae	Opistophthalmus	litoralis	NA	1	1	1	wolb	Namibia	Opuwo_Kunene_Region	-18.0774	13.8432	1997-1998	NA	Baldo07	21.6	245	30.7	9.9	BWh
arachnida	Scorpiones	Scorpionidae	Opistophthalmus	sp.	NA	2	2	1	wolb	South_Africa	Namaqualand_Northern_Cape	-29.3667	17.6667	1997-1998	NA	Baldo07	16.8	388.1	29	4.8	BWk
arachnida	Scorpiones	Scorpionidae	Opistophthalmus	sp.	NA	1	1	1	wolb	South_Africa	Ceres_Western_Cape	-32.85	19.2833	1997-1998	NA	Baldo07	14.2	444.9	28.7	1.6	Csb
arachnida	Scorpiones	Scorpionidae	Opistophthalmus	sp.	NA	1	1	1	wolb	South_Africa	Namaqualand_Northern_Cape	-29.3667	18.8833	1997-1998	NA	Baldo07	19.3	510	34.9	4.3	BWh
arachnida	Scorpiones	Scorpionidae	Opistophthalmus	sp.	NA	1	1	1	wolb	South_Africa	Namaqualand_Northern_Cape	-28.6167	16.8667	1997-1998	NA	Baldo07	16.1	235.8	24.5	6.6	BWk
arachnida	Scorpiones	Vaejovidae	Paruroctonus	arenicola	NA	1	0	1	wolb	US_CA	SanBernardinoCo	34.8371	-117.088	NA	NA	Bryson14	18	751.9	38.5	0.8	BSk
arachnida	Scorpiones	Vaejovidae	Paruroctonus	arenicola	NA	1	0	1	card	US_CA	SanBernardinoCo	34.8371	-117.088	NA	NA	Bryson14	18	751.9	38.5	0.8	BSk
arachnida	Scorpiones	Vaejovidae	Paruroctonus	becki	NA	1	0	1	wolb	US_AZ	MohaveCo	35.6022	-114.763	NA	NA	Bryson14	19.9	835.3	39.5	3.3	BWh
arachnida	Scorpiones	Vaejovidae	Paruroctonus	becki	NA	1	0	1	card	US_AZ	MohaveCo	35.6022	-114.763	NA	NA	Bryson14	19.9	835.3	39.5	3.3	BWh
arachnida	Scorpiones	Vaejovidae	Paruroctonus	boreus	NA	1	0	1	wolb	US_NV	ElkoCo	41.0561	-116.651	NA	NA	Bryson14	7.5	789.1	30.8	-9.3	BSk
arachnida	Scorpiones	Vaejovidae	Paruroctonus	boreus	NA	1	0	1	card	US_NV	ElkoCo	41.0561	-116.651	NA	NA	Bryson14	7.5	789.1	30.8	-9.3	BSk
arachnida	Scorpiones	Vaejovidae	Paruroctonus	gracilior	NA	1	0	1	wolb	US_AZ	CochiseCo	31.88	-110.315	NA	NA	Bryson14	16.5	673	34.3	-0.7	BWh
arachnida	Scorpiones	Vaejovidae	Paruroctonus	gracilior	NA	1	0	1	card	US_AZ	CochiseCo	31.88	-110.315	NA	NA	Bryson14	16.5	673	34.3	-0.7	BWh
arachnida	Scorpiones	Vaejovidae	Paruroctonus	luteolus	NA	1	0	1	wolb	US_CA	InyoCo	36.623	-118.34	NA	NA	Bryson14	0.5	539.4	15.8	-10.9	BSk
arachnida	Scorpiones	Vaejovidae	Paruroctonus	luteolus	NA	1	0	1	card	US_CA	InyoCo	36.623	-118.34	NA	NA	Bryson14	0.5	539.4	15.8	-10.9	BSk
arachnida	Scorpiones	Vaejovidae	Paruroctonus	pecos	NA	1	0	1	wolb	US_NM	QuayCo	35.1722	-104.146	NA	NA	Bryson14	12.9	786.1	32.2	-6.3	BSk
arachnida	Scorpiones	Vaejovidae	Paruroctonus	pecos	NA	1	0	1	card	US_NM	QuayCo	35.1722	-104.146	NA	NA	Bryson14	12.9	786.1	32.2	-6.3	BSk
arachnida	Scorpiones	Vaejovidae	Paruroctonus	shulovi	NA	1	0	1	wolb	US_NV	ClarkCo	35.9276	-115.53	NA	NA	Bryson14	11.3	738.3	30.5	-4.1	BWk
arachnida	Scorpiones	Vaejovidae	Paruroctonus	shulovi	NA	1	0	1	card	US_NV	ClarkCo	35.9276	-115.53	NA	NA	Bryson14	11.3	738.3	30.5	-4.1	BWk
arachnida	Scorpiones	Vaejovidae	Paruroctonus	silvestrii	NA	1	0	1	wolb	US_CA	RiversideCo	33.7501	-117.177	NA	NA	Bryson14	17.4	527.2	34.2	3.7	BSk
arachnida	Scorpiones	Vaejovidae	Paruroctonus	silvestrii	NA	1	0	1	card	US_CA	RiversideCo	33.7501	-117.177	NA	NA	Bryson14	17.4	527.2	34.2	3.7	BSk
arachnida	Scorpiones	Vaejovidae	Paruroctonus	utahensis	NA	1	0	1	wolb	US_NM	SanteFeCo	35.5214	-106.262	NA	NA	Bryson14	12.2	831	33	-6.8	Cfa
arachnida	Scorpiones	Vaejovidae	Paruroctonus	utahensis	NA	1	0	1	card	US_NM	SanteFeCo	35.5214	-106.262	NA	NA	Bryson14	12.2	831	33	-6.8	Cfa
arachnida	Scorpiones	Vaejovidae	Paruroctonus	variabilis	NA	1	0	1	wolb	US_CA	FresnoCo	36.7433	-120.761	NA	NA	Bryson14	15	623.7	35.6	0.2	BSk
arachnida	Scorpiones	Vaejovidae	Paruroctonus	variabilis	NA	1	0	1	card	US_CA	FresnoCo	36.7433	-120.761	NA	NA	Bryson14	15	623.7	35.6	0.2	BSk
arachnida	Scorpiones	Vaejovidae	Paruroctonus	xanthus	NA	1	0	1	wolb	US_AZ	YumaCo	32.7515	-114.635	NA	NA	Bryson14	22.9	733.2	41.6	5.6	BWh
arachnida	Scorpiones	Vaejovidae	Paruroctonus	xanthus	NA	1	0	1	card	US_AZ	YumaCo	32.7515	-114.635	NA	NA	Bryson14	22.9	733.2	41.6	5.6	BWh
arachnida	Scorpiones	Vaejovidae	Pseudouroctonus	apacheanus	NA	1	0	1	wolb	US_AZ	CochiseCo	31.88	-110.315	NA	NA	Bryson14	16.5	673	34.3	-0.7	BWh
arachnida	Scorpiones	Vaejovidae	Pseudouroctonus	apacheanus	NA	1	0	1	card	US_AZ	CochiseCo	31.88	-110.315	NA	NA	Bryson14	16.5	673	34.3	-0.7	BWh
arachnida	Scorpiones	Vaejovidae	Pseudouroctonus	apacheanus	NA	1	0	1	wolb	US_AZ	GrahamCo	33.0385	-110.346	NA	NA	Bryson14	13.8	689.2	31.7	-2.2	BSk
arachnida	Scorpiones	Vaejovidae	Pseudouroctonus	apacheanus	NA	1	0	1	card	US_AZ	GrahamCo	33.0385	-110.346	NA	NA	Bryson14	13.8	689.2	31.7	-2.2	BSk
arachnida	Scorpiones	Vaejovidae	Pseudouroctonus	reddelli	NA	1	0	1	wolb	US_TX	BexarCo	29.4379	-98.7419	NA	NA	Bryson14	20.3	653	35.2	4.2	Cfa
arachnida	Scorpiones	Vaejovidae	Pseudouroctonus	reddelli	NA	1	0	1	card	US_TX	BexarCo	29.4379	-98.7419	NA	NA	Bryson14	20.3	653	35.2	4.2	Cfa
arachnida	Scorpiones	Vaejovidae	Pseudouroctonus	reddelli	NA	1	0	1	wolb	US_TX	EdwardsCo	29.9573	-100.508	NA	NA	Bryson14	18.6	665.4	33.9	0.9	BSh
arachnida	Scorpiones	Vaejovidae	Pseudouroctonus	reddelli	NA	1	0	1	card	US_TX	EdwardsCo	29.9573	-100.508	NA	NA	Bryson14	18.6	665.4	33.9	0.9	BSh
arachnida	Scorpiones	Vaejovidae	Pseudouroctonus	williamsi	NA	1	0	1	wolb	US_CA	SanDiegoCo	33.0168	-117.406	NA	NA	Bryson14	NA	NA	NA	NA	BSk
arachnida	Scorpiones	Vaejovidae	Pseudouroctonus	williamsi	NA	1	0	1	card	US_CA	SanDiegoCo	33.0168	-117.406	NA	NA	Bryson14	NA	NA	NA	NA	BSk
arachnida	Scorpiones	Vaejovidae	Serradigitus	allredi	NA	1	0	1	wolb	US_AZ	PinalCo	32.9836	-111.886	NA	NA	Bryson14	21	788	41.2	1.9	BWh
arachnida	Scorpiones	Vaejovidae	Serradigitus	allredi	NA	1	0	1	card	US_AZ	PinalCo	32.9836	-111.886	NA	NA	Bryson14	21	788	41.2	1.9	BWh
arachnida	Scorpiones	Vaejovidae	Serradigitus	gertschi	NA	1	0	1	wolb	US_CA	FresnoCo	36.7433	-120.761	NA	NA	Bryson14	15	623.7	35.6	0.2	BSk
arachnida	Scorpiones	Vaejovidae	Serradigitus	gertschi	NA	1	0	1	card	US_CA	FresnoCo	36.7433	-120.761	NA	NA	Bryson14	15	623.7	35.6	0.2	BSk
arachnida	Scorpiones	Vaejovidae	Serradigitus	joshuaensis	NA	1	0	1	wolb	US_AZ	MohaveCo	35.6022	-114.763	NA	NA	Bryson14	19.9	835.3	39.5	3.3	BWh
arachnida	Scorpiones	Vaejovidae	Serradigitus	joshuaensis	NA	1	0	1	card	US_AZ	MohaveCo	35.6022	-114.763	NA	NA	Bryson14	19.9	835.3	39.5	3.3	BWh
arachnida	Scorpiones	Vaejovidae	Serradigitus	mesaensis	NA	1	0	1	wolb	US_AZ	MohaveCo	35.6022	-114.763	NA	NA	Bryson14	19.9	835.3	39.5	3.3	BWh
arachnida	Scorpiones	Vaejovidae	Serradigitus	mesaensis	NA	1	0	1	card	US_AZ	MohaveCo	35.6022	-114.763	NA	NA	Bryson14	19.9	835.3	39.5	3.3	BWh
arachnida	Scorpiones	Vaejovidae	Serradigitus	miscionei	NA	1	0	1	wolb	US_AZ	PimaCo	31.9675	-113.012	NA	NA	Bryson14	21.6	672.2	38.8	5.4	BWh
arachnida	Scorpiones	Vaejovidae	Serradigitus	miscionei	NA	1	0	1	card	US_AZ	PimaCo	31.9675	-113.012	NA	NA	Bryson14	21.6	672.2	38.8	5.4	BWh
arachnida	Scorpiones	Vaejovidae	Serradigitus	subtilimanus	NA	1	0	1	wolb	US_AZ	MohaveCo	35.6022	-114.763	NA	NA	Bryson14	19.9	835.3	39.5	3.3	BWh
arachnida	Scorpiones	Vaejovidae	Serradigitus	subtilimanus	NA	1	0	1	card	US_AZ	MohaveCo	35.6022	-114.763	NA	NA	Bryson14	19.9	835.3	39.5	3.3	BWh
arachnida	Scorpiones	Vaejovidae	Serradigitus	vachoni	NA	1	0	1	wolb	US_CA	InyoCo	36.623	-118.34	NA	NA	Bryson14	0.5	539.4	15.8	-10.9	BSk
arachnida	Scorpiones	Vaejovidae	Serradigitus	vachoni	NA	1	0	1	card	US_CA	InyoCo	36.623	-118.34	NA	NA	Bryson14	0.5	539.4	15.8	-10.9	BSk
arachnida	Scorpiones	Vaejovidae	Serradigitus	vachoni	NA	1	0	1	wolb	US_NV	ClarkCo	35.9276	-115.53	NA	NA	Bryson14	11.3	738.3	30.5	-4.1	BWk
arachnida	Scorpiones	Vaejovidae	Serradigitus	vachoni	NA	1	0	1	card	US_NV	ClarkCo	35.9276	-115.53	NA	NA	Bryson14	11.3	738.3	30.5	-4.1	BWk
arachnida	Scorpiones	Vaejovidae	Serradigitus	wupatkiensis	NA	1	0	1	wolb	US_NV	ClarkCo	35.9276	-115.53	NA	NA	Bryson14	11.3	738.3	30.5	-4.1	BWk
arachnida	Scorpiones	Vaejovidae	Serradigitus	wupatkiensis	NA	1	0	1	card	US_NV	ClarkCo	35.9276	-115.53	NA	NA	Bryson14	11.3	738.3	30.5	-4.1	BWk
arachnida	Scorpiones	Vaejovidae	Uroctonites	franckei	NA	1	0	1	wolb	US_CA	InyoCo	36.623	-118.34	NA	NA	Bryson14	0.5	539.4	15.8	-10.9	BSk
arachnida	Scorpiones	Vaejovidae	Uroctonites	franckei	NA	1	0	1	card	US_CA	InyoCo	36.623	-118.34	NA	NA	Bryson14	0.5	539.4	15.8	-10.9	BSk
arachnida	Scorpiones	Vaejovidae	Uroctonites	huachuca	NA	1	0	1	wolb	US_AZ	CochiseCo	31.88	-110.315	NA	NA	Bryson14	16.5	673	34.3	-0.7	BWh
arachnida	Scorpiones	Vaejovidae	Uroctonites	huachuca	NA	1	0	1	card	US_AZ	CochiseCo	31.88	-110.315	NA	NA	Bryson14	16.5	673	34.3	-0.7	BWh
arachnida	Scorpiones	Vaejovidae	Uroctonites	huachuca	NA	1	0	1	wolb	US_AZ	SantaCruzCo	31.5323	-111.189	NA	NA	Bryson14	16	631.8	32.9	0	BSk
arachnida	Scorpiones	Vaejovidae	Uroctonites	huachuca	NA	1	0	1	card	US_AZ	SantaCruzCo	31.5323	-111.189	NA	NA	Bryson14	16	631.8	32.9	0	BSk
arachnida	Scorpiones	Vaejovidae	Uroctonites	mordax	NA	1	0	1	wolb	US_CA	MarinCo	38.0621	-123.019	NA	NA	Bryson14	NA	NA	NA	NA	Csb
arachnida	Scorpiones	Vaejovidae	Uroctonites	mordax	NA	1	0	1	card	US_CA	MarinCo	38.0621	-123.019	NA	NA	Bryson14	NA	NA	NA	NA	Csb
arachnida	Scorpiones	Vaejovidae	Vaejovis	carolinianus	NA	1	0	1	wolb	US_GA	approx	32.4167	-83.0501	NA	NA	Bryson14	18.1	681.7	33.7	1.5	Cfa
arachnida	Scorpiones	Vaejovidae	Vaejovis	carolinianus	NA	1	0	1	card	US_GA	approx	32.4167	-83.0501	NA	NA	Bryson14	18.1	681.7	33.7	1.5	Cfa
arachnida	Scorpiones	Vaejovidae	Vaejovis	cashi	NA	1	0	1	wolb	US_AZ	CochiseCo	31.88	-110.315	NA	NA	Bryson14	16.5	673	34.3	-0.7	BWh
arachnida	Scorpiones	Vaejovidae	Vaejovis	cashi	NA	1	0	1	card	US_AZ	CochiseCo	31.88	-110.315	NA	NA	Bryson14	16.5	673	34.3	-0.7	BWh
arachnida	Scorpiones	Vaejovidae	Vaejovis	cashi	NA	1	0	1	wolb	US_NM	HidalgoCo	32.0549	-109.198	NA	NA	Bryson14	15.6	705.3	34.6	-2.5	BWk
arachnida	Scorpiones	Vaejovidae	Vaejovis	cashi	NA	1	0	1	card	US_NM	HidalgoCo	32.0549	-109.198	NA	NA	Bryson14	15.6	705.3	34.6	-2.5	BWk
arachnida	Scorpiones	Vaejovidae	Vaejovis	chisos	NA	1	0	1	wolb	US_TX	BrewsterCo	29.9573	-100.508	NA	NA	Bryson14	18.6	665.4	33.9	0.9	BSh
arachnida	Scorpiones	Vaejovidae	Vaejovis	chisos	NA	1	0	1	card	US_TX	BrewsterCo	29.9573	-100.508	NA	NA	Bryson14	18.6	665.4	33.9	0.9	BSh
arachnida	Scorpiones	Vaejovidae	Vaejovis	confusus	NA	1	0	1	wolb	US_NV	ClarkCo	35.9276	-115.53	NA	NA	Bryson14	11.3	738.3	30.5	-4.1	BWk
arachnida	Scorpiones	Vaejovidae	Vaejovis	confusus	NA	1	0	1	card	US_NV	ClarkCo	35.9276	-115.53	NA	NA	Bryson14	11.3	738.3	30.5	-4.1	BWk
arachnida	Scorpiones	Vaejovidae	Vaejovis	feti	NA	1	0	1	wolb	US_NM	SocorroCo	34.0278	-107.386	NA	NA	Bryson14	9.7	719.9	29.1	-9.1	BSk
arachnida	Scorpiones	Vaejovidae	Vaejovis	feti	NA	1	0	1	card	US_NM	SocorroCo	34.0278	-107.386	NA	NA	Bryson14	9.7	719.9	29.1	-9.1	BSk
arachnida	Scorpiones	Vaejovidae	Vaejovis	franckei	NA	1	0	1	wolb	Mexico	Oaxaca_CerroCorraldelPiedra	16.8433	-97.9232	NA	NA	Bryson14	24	137.7	34.5	12.5	Aw
arachnida	Scorpiones	Vaejovidae	Vaejovis	franckei	NA	1	0	1	card	Mexico	Oaxaca_CerroCorraldelPiedra	16.8433	-97.9232	NA	NA	Bryson14	24	137.7	34.5	12.5	Aw
arachnida	Scorpiones	Vaejovidae	Vaejovis	granulatus	NA	1	0	1	wolb	Mexico	Morelos_Zempoala	19.0553	-99.3218	NA	NA	Bryson14	11.8	146.8	21.6	0.8	Cwb
arachnida	Scorpiones	Vaejovidae	Vaejovis	granulatus	NA	1	0	1	card	Mexico	Morelos_Zempoala	19.0553	-99.3218	NA	NA	Bryson14	11.8	146.8	21.6	0.8	Cwb
arachnida	Scorpiones	Vaejovidae	Vaejovis	hirsuticauda	NA	1	0	1	wolb	US_NV	ClarkCo	35.9276	-115.53	NA	NA	Bryson14	11.3	738.3	30.5	-4.1	BWk
arachnida	Scorpiones	Vaejovidae	Vaejovis	hirsuticauda	NA	1	0	1	card	US_NV	ClarkCo	35.9276	-115.53	NA	NA	Bryson14	11.3	738.3	30.5	-4.1	BWk
arachnida	Scorpiones	Vaejovidae	Vaejovis	intermedius	NA	1	0	1	wolb	US_TX	ValVerdeCo	29.7631	-101.79	NA	NA	Bryson14	21	713.6	36.3	2.2	BWh
arachnida	Scorpiones	Vaejovidae	Vaejovis	intermedius	NA	1	0	1	card	US_TX	ValVerdeCo	29.7631	-101.79	NA	NA	Bryson14	21	713.6	36.3	2.2	BWh
arachnida	Scorpiones	Vaejovidae	Vaejovis	lapidicola	NA	1	0	1	wolb	US_AZ	CoconinoCo	35.6279	-113.173	NA	NA	Bryson14	11.3	726.1	31.6	-4.9	BSk
arachnida	Scorpiones	Vaejovidae	Vaejovis	lapidicola	NA	1	0	1	card	US_AZ	CoconinoCo	35.6279	-113.173	NA	NA	Bryson14	11.3	726.1	31.6	-4.9	BSk
arachnida	Scorpiones	Vaejovidae	Vaejovis	mumai	NA	1	0	1	wolb	US_AZ	MohaveCo	35.6022	-114.763	NA	NA	Bryson14	19.9	835.3	39.5	3.3	BWh
arachnida	Scorpiones	Vaejovidae	Vaejovis	mumai	NA	1	0	1	card	US_AZ	MohaveCo	35.6022	-114.763	NA	NA	Bryson14	19.9	835.3	39.5	3.3	BWh
arachnida	Scorpiones	Vaejovidae	Vaejovis	punctatus	NA	1	0	1	wolb	Mexico	Aguascalientes:SierraFria	22.1668	-102.561	NA	NA	Bryson14	14.8	251.6	26.7	2.1	BSk
arachnida	Scorpiones	Vaejovidae	Vaejovis	punctatus	NA	1	0	1	card	Mexico	Aguascalientes:SierraFria	22.1668	-102.561	NA	NA	Bryson14	14.8	251.6	26.7	2.1	BSk
arachnida	Scorpiones	Vaejovidae	Vaejovis	spinigerus	NA	1	0	1	wolb	US_NM	HidalgoCo	32.0549	-109.198	NA	NA	Bryson14	15.6	705.3	34.6	-2.5	BWk
arachnida	Scorpiones	Vaejovidae	Vaejovis	spinigerus	NA	1	0	1	card	US_NM	HidalgoCo	32.0549	-109.198	NA	NA	Bryson14	15.6	705.3	34.6	-2.5	BWk
arachnida	Scorpiones	Vaejovidae	Vaejovis	tesselatus	NA	1	0	1	wolb	Mexico	SanLuisPotosAlvarez	21.8449	-99.6417	NA	NA	Bryson14	21.5	334.9	33.1	9.5	Cwa
arachnida	Scorpiones	Vaejovidae	Vaejovis	tesselatus	NA	1	0	1	card	Mexico	SanLuisPotosAlvarez	21.8449	-99.6417	NA	NA	Bryson14	21.5	334.9	33.1	9.5	Cwa
arachnida	Scorpiones	Vaejovidae	Vaejovis	waueri	NA	1	0	1	wolb	US_TX	TerrellCo	30.2189	-102.387	NA	NA	Bryson14	17.7	690.8	33	-0.8	BWh
arachnida	Scorpiones	Vaejovidae	Vaejovis	waueri	NA	1	0	1	card	US_TX	TerrellCo	30.2189	-102.387	NA	NA	Bryson14	17.7	690.8	33	-0.8	BWh
arachnida	Trombidiformes	Erythraeidae	Balaustium	sp.	NA	1	1	1	card	US_CA	Riverside	33.953	-117.47	NA	NA	Weeks03	18	464	33.8	4.8	BSk
arachnida	Trombidiformes	Erythraeidae	Balaustium	sp.	NA	1	1	1	wolb	US_CA	Riverside	33.953	-117.47	NA	NA	Weeks03	18	464	33.8	4.8	BSk
arachnida	Trombidiformes	Penthaleidae	Halotydeus	destructor	NA	1	0	1	card	US_CA	Riverside	33.953	-117.47	NA	NA	Weeks03	18	464	33.8	4.8	BSk
arachnida	Trombidiformes	Penthaleidae	Halotydeus	destructor	NA	1	0	1	wolb	US_CA	Riverside	33.953	-117.47	NA	NA	Weeks03	18	464	33.8	4.8	BSk
arachnida	Trombidiformes	Penthaleidae	Penthaleus	major	NA	1	0	1	card	US_CA	Riverside	33.953	-117.47	NA	NA	Weeks03	18	464	33.8	4.8	BSk
arachnida	Trombidiformes	Penthaleidae	Penthaleus	major	NA	1	0	1	wolb	US_CA	Riverside	33.953	-117.47	NA	NA	Weeks03	18	464	33.8	4.8	BSk
arachnida	Trombidiformes	Siteroptidae	Pediculoides	mesembrinae	NA	2	2	1	card	Switzerland	Fehraltorf	47.3909	8.73292	NA	NA	Martin09	8.8	634.4	22.8	-2.8	Cfb
arachnida	Trombidiformes	Syringophilidae	Aulobia	cardueli	host_CommonRedpoll	5	0	1	wolb	Poland	Kopan	54.4583	16.4325	2009	Apr	Glowska15	8.4	719.2	22.2	-4.3	Cfb
arachnida	Trombidiformes	Syringophilidae	Syringophiloidus	parapresentalis	host_Redwing	5	0	1	wolb	Poland	Kopan	54.4583	16.4325	2009	Apr	Glowska15	8.4	719.2	22.2	-4.3	Cfb
arachnida	Trombidiformes	Syringophilidae	Syringophiloidus	sp.	host_SandMartin	3	0	1	wolb	Poland	Kopan	54.4583	16.4325	2009	Apr	Glowska15	8.4	719.2	22.2	-4.3	Cfb
arachnida	Trombidiformes	Syringophilidae	Syringophilopsis	acrocephali	host_SedgeWarbler	3	0	1	wolb	Poland	Kopan	54.4583	16.4325	2009	Apr	Glowska15	8.4	719.2	22.2	-4.3	Cfb
arachnida	Trombidiformes	Syringophilidae	Syringophilopsis	kirgizorum	host_EuropeanGreenfinch	5	0	1	wolb	Poland	Kopan	54.4583	16.4325	2009	Apr	Glowska15	8.4	719.2	22.2	-4.3	Cfb
arachnida	Trombidiformes	Syringophilidae	Syringophilopsis	sp.	host_Blue-headedWagtail	3	0	1	wolb	Poland	Kopan	54.4583	16.4325	2009	Apr	Glowska15	8.4	719.2	22.2	-4.3	Cfb
arachnida	Trombidiformes	Syringophilidae	Syringophilopsis	turdi	host_Redwing	5	1	1	wolb	Poland	Kopan	54.4583	16.4325	2009	Apr	Glowska15	8.4	719.2	22.2	-4.3	Cfb
arachnida	Trombidiformes	Syringophilidae	Syringophilopsis	turdi	host_SongThrush	3	1	1	wolb	Poland	Kopan	54.4583	16.4325	2009	Apr	Glowska15	8.4	719.2	22.2	-4.3	Cfb
arachnida	Trombidiformes	Syringophilidae	Torotrogla	cardueli	host_EuropeanGoldfinch	9	3	1	wolb	Poland	Kopan	54.4583	16.4325	2009	Apr	Glowska15	8.4	719.2	22.2	-4.3	Cfb
arachnida	Trombidiformes	Syringophilidae	Torotrogla	cardueli	host_EurasianSiskin	5	1	1	wolb	Poland	Kopan	54.4583	16.4325	2009	Apr	Glowska15	8.4	719.2	22.2	-4.3	Cfb
arachnida	Trombidiformes	Syringophilidae	Torotrogla	gaudi	host_Chaffinch	5	0	1	wolb	Poland	Kopan	54.4583	16.4325	2009	Apr	Glowska15	8.4	719.2	22.2	-4.3	Cfb
arachnida	Trombidiformes	Syringophilidae	Torotrogla	lusciniae	host_Bluethroat	3	1	1	wolb	Poland	Kopan	54.4583	16.4325	2009	Apr	Glowska15	8.4	719.2	22.2	-4.3	Cfb
arachnida	Trombidiformes	Syringophilidae	Torotrogla	merulae	host_EurasianBlackbird	17	3	1	wolb	Poland	Kopan	54.4583	16.4325	2009	Apr	Glowska15	8.4	719.2	22.2	-4.3	Cfb
arachnida	Trombidiformes	Syringophilidae	Torotrogla	merulae	host_SongThrush	13	0	1	wolb	Poland	Kopan	54.4583	16.4325	2009	Apr	Glowska15	8.4	719.2	22.2	-4.3	Cfb
arachnida	Trombidiformes	Syringophilidae	Torotrogla	modularis	host_HedgeAccentor	5	0	1	wolb	Poland	Kopan	54.4583	16.4325	2009	Apr	Glowska15	8.4	719.2	22.2	-4.3	Cfb
arachnida	Trombidiformes	Syringophilidae	Torotrogla	rubeculi	host_EuropeanRobin	6	1	1	wolb	Poland	Kopan	54.4583	16.4325	2009	Apr	Glowska15	8.4	719.2	22.2	-4.3	Cfb
arachnida	Trombidiformes	Tenuipalpidae	Brevipalpus	obovatus	NA	1	1	1	card	US_CA	Riverside	33.953	-117.47	NA	NA	Weeks03	18	464	33.8	4.8	BSk
arachnida	Trombidiformes	Tenuipalpidae	Brevipalpus	obovatus	NA	1	0	1	wolb	US_CA	Riverside	33.953	-117.47	NA	NA	Weeks03	18	464	33.8	4.8	BSk
arachnida	Trombidiformes	Tenuipalpidae	Brevipalpus	phoenicis	NA	1	1	1	card	US_CA	Riverside	33.953	-117.47	NA	NA	Weeks03	18	464	33.8	4.8	BSk
arachnida	Trombidiformes	Tenuipalpidae	Brevipalpus	phoenicis	NA	1	0	1	wolb	US_CA	Riverside	33.953	-117.47	NA	NA	Weeks03	18	464	33.8	4.8	BSk
arachnida	Trombidiformes	Tetranychidae	Amphitetranychus	viennensis	NA	24	20	1	card	China_Henan	Sanmenxia_Purple-leafplum	34.7667	111.2	2012	Jun	Zhang16	13.6	989.7	32	-6.9	BSk
arachnida	Trombidiformes	Tetranychidae	Amphitetranychus	viennensis	NA	24	0	1	wolb	China_Henan	Sanmenxia_Purple-leafplum	34.7667	111.2	2012	Jun	Zhang16	13.6	989.7	32	-6.9	BSk
arachnida	Trombidiformes	Tetranychidae	Amphitetranychus	viennensis	NA	24	0	1	card	China_Henan	Zhengzhou_Purple-leafplum	34.7667	113.65	2012	Jul	Zhang16	14.5	957.9	32.3	-4.7	Cwa
arachnida	Trombidiformes	Tetranychidae	Amphitetranychus	viennensis	NA	24	4	1	wolb	China_Henan	Zhengzhou_Purple-leafplum	34.7667	113.65	2012	Jul	Zhang16	14.5	957.9	32.3	-4.7	Cwa
arachnida	Trombidiformes	Tetranychidae	Amphitetranychus	viennensis	NA	24	15	1	card	China_Jiangsu	Nanjing_Peach	32.05	118.767	2014	Aug	Zhang16	15.6	897.5	31.9	-1.6	Cfa
arachnida	Trombidiformes	Tetranychidae	Amphitetranychus	viennensis	NA	24	17	1	wolb	China_Jiangsu	Nanjing_Peach	32.05	118.767	2014	Aug	Zhang16	15.6	897.5	31.9	-1.6	Cfa
arachnida	Trombidiformes	Tetranychidae	Amphitetranychus	viennensis	NA	24	16	1	card	China_Jilin	Yanji_Cherry	42.9	129.5	2012	Aug	Zhang16	5.4	1251.1	26.8	-20.1	Dwb
arachnida	Trombidiformes	Tetranychidae	Amphitetranychus	viennensis	NA	24	14	1	wolb	China_Jilin	Yanji_Cherry	42.9	129.5	2012	Aug	Zhang16	5.4	1251.1	26.8	-20.1	Dwb
arachnida	Trombidiformes	Tetranychidae	Amphitetranychus	quercivorus	NA	2	0	1	wolb	NA	NA	NA	NA	NA	NA	Gotoh03	NA	NA	NA	NA	NA
arachnida	Trombidiformes	Tetranychidae	Amphitetranychus	viennensis	NA	2	0	1	wolb	NA	NA	NA	NA	NA	NA	Gotoh03	NA	NA	NA	NA	NA
arachnida	Trombidiformes	Tetranychidae	Aponychus	corpuzae	NA	1	0	1	wolb	NA	NA	NA	NA	NA	NA	Gotoh03	NA	NA	NA	NA	NA
arachnida	Trombidiformes	Tetranychidae	Aponychus	firmianae	NA	1	0	1	wolb	NA	NA	NA	NA	NA	NA	Gotoh03	NA	NA	NA	NA	NA
arachnida	Trombidiformes	Tetranychidae	Bryobia	berlesei	Common_Broom	1	0	1	card	France	Vireux	50.0826	4.68608	2004	May	Ros12	9	567.2	21.9	-1.7	Cfb
arachnida	Trombidiformes	Tetranychidae	Bryobia	berlesei	Common_Broom	1	1	1	wolb	France	Vireux	50.0826	4.68608	2004	May	Ros12	9	567.2	21.9	-1.7	Cfb
arachnida	Trombidiformes	Tetranychidae	Bryobia	kissophila	Hedera_helix	2	0	1	card	Belgium	Lompret	50.0642	4.3762	2004	May	Ros12	9.3	565.4	22.2	-1.5	Cfb
arachnida	Trombidiformes	Tetranychidae	Bryobia	kissophila	Hedera_helix	2	2	1	wolb	Belgium	Lompret	50.0642	4.3762	2004	May	Ros12	9.3	565.4	22.2	-1.5	Cfb
arachnida	Trombidiformes	Tetranychidae	Bryobia	kissophila	Hedera_helix	1	0	1	card	Belgium	Olloy-sur-Viroin	50.0721	4.60526	2004	May	Ros12	9.3	567.6	22.2	-1.5	Cfb
arachnida	Trombidiformes	Tetranychidae	Bryobia	kissophila	Hedera_helix	1	1	1	wolb	Belgium	Olloy-sur-Viroin	50.0721	4.60526	2004	May	Ros12	9.3	567.6	22.2	-1.5	Cfb
arachnida	Trombidiformes	Tetranychidae	Bryobia	kissophila	Hedera_helix	2	0	1	card	France	Angers	47.4777	-0.59804	2004	May	Ros12	11.5	519	24.5	1.4	Cfb
arachnida	Trombidiformes	Tetranychidae	Bryobia	kissophila	Hedera_helix	2	2	1	wolb	France	Angers	47.4777	-0.59804	2004	May	Ros12	11.5	519	24.5	1.4	Cfb
arachnida	Trombidiformes	Tetranychidae	Bryobia	kissophila	Hedera_helix	1	0	1	card	France	Vireux	50.0826	4.68608	2004	May	Ros12	9	567.2	21.9	-1.7	Cfb
arachnida	Trombidiformes	Tetranychidae	Bryobia	kissophila	Hedera_helix	1	1	1	wolb	France	Vireux	50.0826	4.68608	2004	May	Ros12	9	567.2	21.9	-1.7	Cfb
arachnida	Trombidiformes	Tetranychidae	Bryobia	kissophila	Hedera_helix	1	0	1	card	Greece	Thermi	40.5482	23.0162	2005	May	Ros12	15.4	739.9	32	1	Csa
arachnida	Trombidiformes	Tetranychidae	Bryobia	kissophila	Hedera_helix	1	1	1	wolb	Greece	Thermi	40.5482	23.0162	2005	May	Ros12	15.4	739.9	32	1	Csa
arachnida	Trombidiformes	Tetranychidae	Bryobia	kissophila	Hedera_helix	1	0	1	card	Italy	Rome	41.889	12.4658	2005	May	Ros12	15.6	588.4	30.5	3.7	Csa
arachnida	Trombidiformes	Tetranychidae	Bryobia	kissophila	Hedera_helix	1	1	1	wolb	Italy	Rome	41.889	12.4658	2005	May	Ros12	15.6	588.4	30.5	3.7	Csa
arachnida	Trombidiformes	Tetranychidae	Bryobia	kissophila	Hedera_helix	8	0	1	card	Netherlands	Amsterdam	52.3685	4.82841	2006	Nov	Ros12	9.3	528.1	20.7	-0.1	Cfb
arachnida	Trombidiformes	Tetranychidae	Bryobia	kissophila	Hedera_helix	8	8	1	wolb	Netherlands	Amsterdam	52.3685	4.82841	2006	Nov	Ros12	9.3	528.1	20.7	-0.1	Cfb
arachnida	Trombidiformes	Tetranychidae	Bryobia	kissophila	Hedera_helix	2	0	1	card	Netherlands	Amsterdam	52.3685	4.82841	2004	Apr	Ros12	9.3	528.1	20.7	-0.1	Cfb
arachnida	Trombidiformes	Tetranychidae	Bryobia	kissophila	Hedera_helix	2	2	1	wolb	Netherlands	Amsterdam	52.3685	4.82841	2004	Apr	Ros12	9.3	528.1	20.7	-0.1	Cfb
arachnida	Trombidiformes	Tetranychidae	Bryobia	kissophila	Hedera_helix	2	0	1	card	Netherlands	Hardegarijp	53.2148	5.93796	2004	Apr	Ros12	8.8	531.4	20.4	-0.9	Cfb
arachnida	Trombidiformes	Tetranychidae	Bryobia	kissophila	Hedera_helix	2	2	1	wolb	Netherlands	Hardegarijp	53.2148	5.93796	2004	Apr	Ros12	8.8	531.4	20.4	-0.9	Cfb
arachnida	Trombidiformes	Tetranychidae	Bryobia	kissophila	Hedera_helix	2	0	1	card	Netherlands	Valkenburg	52.1794	5.8036	2004	May	Ros12	9.1	541.3	21.1	-0.9	Cfb
arachnida	Trombidiformes	Tetranychidae	Bryobia	kissophila	Hedera_helix	2	2	1	wolb	Netherlands	Valkenburg	52.1794	5.8036	2004	May	Ros12	9.1	541.3	21.1	-0.9	Cfb
arachnida	Trombidiformes	Tetranychidae	Bryobia	kissophila	Hedera_helix	1	0	1	card	Netherlands	Den_Burg__Texel	53.055	4.74368	2006	Jun	Ros12	8.9	526	19.5	0.1	Cfb
arachnida	Trombidiformes	Tetranychidae	Bryobia	kissophila	Hedera_helix	1	1	1	wolb	Netherlands	Den_Burg__Texel	53.055	4.74368	2006	Jun	Ros12	8.9	526	19.5	0.1	Cfb
arachnida	Trombidiformes	Tetranychidae	Bryobia	kissophila	Hedera_helix	1	0	1	card	Netherlands	Nes__Ameland	53.4516	5.76222	2006	Jun	Ros12	8.7	531.5	20	-0.8	Cfb
arachnida	Trombidiformes	Tetranychidae	Bryobia	kissophila	Hedera_helix	1	1	1	wolb	Netherlands	Nes__Ameland	53.4516	5.76222	2006	Jun	Ros12	8.7	531.5	20	-0.8	Cfb
arachnida	Trombidiformes	Tetranychidae	Bryobia	kissophila	Hedera_helix	1	0	1	card	Netherlands	Varsseveld	51.9401	6.45248	2004	May	Ros12	9.7	560.9	22.1	-0.6	Cfb
arachnida	Trombidiformes	Tetranychidae	Bryobia	kissophila	Hedera_helix	1	1	1	wolb	Netherlands	Varsseveld	51.9401	6.45248	2004	May	Ros12	9.7	560.9	22.1	-0.6	Cfb
arachnida	Trombidiformes	Tetranychidae	Bryobia	kissophila	Hedera_helix	1	0	1	card	Portugal	Portimao_Portugal	37.1356	-8.57038	2005	Feb	Ros12	17.1	402.2	28.7	8.1	Csb
arachnida	Trombidiformes	Tetranychidae	Bryobia	kissophila	Hedera_helix	1	1	1	wolb	Portugal	Portimao_Portugal	37.1356	-8.57038	2005	Feb	Ros12	17.1	402.2	28.7	8.1	Csb
arachnida	Trombidiformes	Tetranychidae	Bryobia	kissophila	Hedera_helix	1	0	1	card	South_Africa	Johannesburg_South_Africa	-26.2075	28.0049	2005	Aug	Ros12	16.1	357.9	26	2.8	Cwb
arachnida	Trombidiformes	Tetranychidae	Bryobia	kissophila	Hedera_helix	1	1	1	wolb	South_Africa	Johannesburg_South_Africa	-26.2075	28.0049	2005	Aug	Ros12	16.1	357.9	26	2.8	Cwb
arachnida	Trombidiformes	Tetranychidae	Bryobia	kissophila	Hedera_helix	3	0	1	card	Spain	Gatova	39.7603	-0.523791	2004	Apr	Ros12	13.7	566.6	27.4	2.4	Csa
arachnida	Trombidiformes	Tetranychidae	Bryobia	kissophila	Hedera_helix	3	3	1	wolb	Spain	Gatova	39.7603	-0.523791	2004	Apr	Ros12	13.7	566.6	27.4	2.4	Csa
arachnida	Trombidiformes	Tetranychidae	Bryobia	kissophila	Hedera_helix	2	0	1	card	Spain	Alcossebres	40.2478	0.272421	2004	Apr	Ros12	17.1	518.8	29.3	5.9	Csa
arachnida	Trombidiformes	Tetranychidae	Bryobia	kissophila	Hedera_helix	2	2	1	wolb	Spain	Alcossebres	40.2478	0.272421	2004	Apr	Ros12	17.1	518.8	29.3	5.9	Csa
arachnida	Trombidiformes	Tetranychidae	Bryobia	kissophila	Hedera_helix	1	0	1	card	Spain	Alcossebres	40.2478	0.272421	2004	Apr	Ros12	17.1	518.8	29.3	5.9	Csa
arachnida	Trombidiformes	Tetranychidae	Bryobia	kissophila	Hedera_helix	1	1	1	wolb	Spain	Alcossebres	40.2478	0.272421	2004	Apr	Ros12	17.1	518.8	29.3	5.9	Csa
arachnida	Trombidiformes	Tetranychidae	Bryobia	kissophila	Hedera_helix	1	0	1	card	Spain	Begues	41.3325	1.91725	2004	Apr	Ros12	14.9	527.7	26.7	4.9	Cfa
arachnida	Trombidiformes	Tetranychidae	Bryobia	kissophila	Hedera_helix	1	1	1	wolb	Spain	Begues	41.3325	1.91725	2004	Apr	Ros12	14.9	527.7	26.7	4.9	Cfa
arachnida	Trombidiformes	Tetranychidae	Bryobia	kissophila	Hedera_helix	1	0	1	card	Spain	Villanova_dEscornalbou	41.111	0.937557	2004	Apr	Ros12	15.3	547.3	28.2	4	Csa
arachnida	Trombidiformes	Tetranychidae	Bryobia	kissophila	Hedera_helix	1	1	1	wolb	Spain	Villanova_dEscornalbou	41.111	0.937557	2004	Apr	Ros12	15.3	547.3	28.2	4	Csa
arachnida	Trombidiformes	Tetranychidae	Bryobia	kissophila	Hedera_helix	1	0	1	card	US_CA	Riverside_United_Sates	33.9505	-117.47	2005	May	Ros12	18	464	33.8	4.8	BSk
arachnida	Trombidiformes	Tetranychidae	Bryobia	kissophila	Hedera_helix	1	1	1	wolb	US_CA	Riverside_United_Sates	33.9505	-117.47	2005	May	Ros12	18	464	33.8	4.8	BSk
arachnida	Trombidiformes	Tetranychidae	Bryobia	praetiosa	Grass_and_herbs	1	0	1	card	Netherlands	Amsterdam	52.3685	4.82841	2004	May	Ros12	9.3	528.1	20.7	-0.1	Cfb
arachnida	Trombidiformes	Tetranychidae	Bryobia	praetiosa	Grass_and_herbs	1	1	1	wolb	Netherlands	Amsterdam	52.3685	4.82841	2004	May	Ros12	9.3	528.1	20.7	-0.1	Cfb
arachnida	Trombidiformes	Tetranychidae	Bryobia	rubrioculus	Apple	1	1	1	card	France	Aubrives	50.0886	4.73166	2004	May	Ros12	9.6	568.4	22.5	-1.2	Cfb
arachnida	Trombidiformes	Tetranychidae	Bryobia	rubrioculus	Apple	1	1	1	wolb	France	Aubrives	50.0886	4.73166	2004	May	Ros12	9.6	568.4	22.5	-1.2	Cfb
arachnida	Trombidiformes	Tetranychidae	Bryobia	rubrioculus	Apple	1	1	1	card	France	Peumerit	47.9459	-4.31326	2006	Aug	Ros12	11.3	366.3	20.2	3.8	Cfb
arachnida	Trombidiformes	Tetranychidae	Bryobia	rubrioculus	Apple	1	1	1	wolb	France	Peumerit	47.9459	-4.31326	2006	Aug	Ros12	11.3	366.3	20.2	3.8	Cfb
arachnida	Trombidiformes	Tetranychidae	Bryobia	rubrioculus	Apple	4	4	1	card	Netherlands	Amsterdam	52.3685	4.82841	2006	May	Ros12	9.3	528.1	20.7	-0.1	Cfb
arachnida	Trombidiformes	Tetranychidae	Bryobia	rubrioculus	Plum	4	0	1	card	Netherlands	Amsterdam	52.3685	4.82841	2006	May	Ros12	9.3	528.1	20.7	-0.1	Cfb
arachnida	Trombidiformes	Tetranychidae	Bryobia	rubrioculus	Apple	4	4	1	wolb	Netherlands	Amsterdam	52.3685	4.82841	2006	May	Ros12	9.3	528.1	20.7	-0.1	Cfb
arachnida	Trombidiformes	Tetranychidae	Bryobia	rubrioculus	Plum	4	4	1	wolb	Netherlands	Amsterdam	52.3685	4.82841	2006	May	Ros12	9.3	528.1	20.7	-0.1	Cfb
arachnida	Trombidiformes	Tetranychidae	Bryobia	rubrioculus	Apple	2	1	1	card	Poland	Krakow	50.0558	19.9347	2006	May	Ros12	8.2	756.1	23.5	-6.9	Dfb
arachnida	Trombidiformes	Tetranychidae	Bryobia	rubrioculus	Apple	2	2	1	wolb	Poland	Krakow	50.0558	19.9347	2006	May	Ros12	8.2	756.1	23.5	-6.9	Dfb
arachnida	Trombidiformes	Tetranychidae	Bryobia	sarothamni	Common_Broom	1	0	1	card	Belgium	Vierves_sur_Viroin	50.0802	4.63313	2004	May	Ros12	9.1	566.7	22	-1.7	Cfb
arachnida	Trombidiformes	Tetranychidae	Bryobia	sarothamni	Common_Broom	1	0	1	card	Belgium	Vierves_sur_Viroin	50.0802	4.63313	2004	May	Ros12	9.1	566.7	22	-1.7	Cfb
arachnida	Trombidiformes	Tetranychidae	Bryobia	sarothamni	Common_Broom	1	1	1	wolb	Belgium	Vierves_sur_Viroin	50.0802	4.63313	2006	Jul	Ros12	9.1	566.7	22	-1.7	Cfb
arachnida	Trombidiformes	Tetranychidae	Bryobia	sarothamni	Common_Broom	1	1	1	wolb	Belgium	Vierves_sur_Viroin	50.0802	4.63313	2006	Jul	Ros12	9.1	566.7	22	-1.7	Cfb
arachnida	Trombidiformes	Tetranychidae	Bryobia	sarothamni	Common_Broom	5	3	1	card	France	Vireux	50.0826	4.68608	2004	May	Ros12	9	567.2	21.9	-1.7	Cfb
arachnida	Trombidiformes	Tetranychidae	Bryobia	sarothamni	Common_Broom	5	5	1	wolb	France	Vireux	50.0826	4.68608	2004	May	Ros12	9	567.2	21.9	-1.7	Cfb
arachnida	Trombidiformes	Tetranychidae	Bryobia	sarothamni	Common_Broom	3	3	1	card	France	Piriac_sur_mer	47.3795	9.41857	2006	Aug	Ros12	6.6	635	20.4	-5.5	Dfc
arachnida	Trombidiformes	Tetranychidae	Bryobia	sarothamni	Common_Broom	3	2	1	wolb	France	Piriac_sur_mer	47.3795	9.41857	2006	Aug	Ros12	6.6	635	20.4	-5.5	Dfc
arachnida	Trombidiformes	Tetranychidae	Bryobia	sp.	Vetches	2	0	1	card	Belgium	Olloy-sur-Viroin	50.0721	4.60526	2004	May	Ros12	9.3	567.6	22.2	-1.5	Cfb
arachnida	Trombidiformes	Tetranychidae	Bryobia	sp.	Vetches	2	2	1	wolb	Belgium	Olloy-sur-Viroin	50.0721	4.60526	2004	May	Ros12	9.3	567.6	22.2	-1.5	Cfb
arachnida	Trombidiformes	Tetranychidae	Bryobia	sp.	Grass_and_herbs	1	0	1	card	Italy	San_Felice_Circeo	41.2595	13.0836	2005	May	Ros12	15.5	514.3	28.4	4.8	Csa
arachnida	Trombidiformes	Tetranychidae	Bryobia	sp.	Grass_and_herbs	1	1	1	wolb	Italy	San_Felice_Circeo	41.2595	13.0836	2005	May	Ros12	15.5	514.3	28.4	4.8	Csa
arachnida	Trombidiformes	Tetranychidae	Bryobia	sp.	Vetches	1	0	1	card	Netherlands	Nieuweschans	53.1824	7.19854	2006	May	Ros12	9	567.5	21.2	-1.2	Cfb
arachnida	Trombidiformes	Tetranychidae	Bryobia	sp.	Vetches	1	1	1	wolb	Netherlands	Nieuweschans	53.1824	7.19854	2006	May	Ros12	9	567.5	21.2	-1.2	Cfb
arachnida	Trombidiformes	Tetranychidae	Bryobia	sp.	NA	1	0	1	card	US_CA	Riverside	33.953	-117.47	NA	NA	Weeks03	18	464	33.8	4.8	BSk
arachnida	Trombidiformes	Tetranychidae	Bryobia	sp.	NA	1	1	1	wolb	US_CA	Riverside	33.953	-117.47	NA	NA	Weeks03	18	464	33.8	4.8	BSk
arachnida	Trombidiformes	Tetranychidae	Eotetranychus	asiaticus	NA	1	0	1	wolb	NA	NA	NA	NA	NA	NA	Gotoh03	NA	NA	NA	NA	NA
arachnida	Trombidiformes	Tetranychidae	Eotetranychus	cornicola	NA	1	0	1	wolb	NA	NA	NA	NA	NA	NA	Gotoh03	NA	NA	NA	NA	NA
arachnida	Trombidiformes	Tetranychidae	Eotetranychus	dissectus	NA	1	0	1	wolb	NA	NA	NA	NA	NA	NA	Gotoh03	NA	NA	NA	NA	NA
arachnida	Trombidiformes	Tetranychidae	Eotetranychus	rubricans	NA	1	0	1	wolb	NA	NA	NA	NA	NA	NA	Gotoh03	NA	NA	NA	NA	NA
arachnida	Trombidiformes	Tetranychidae	Eotetranychus	smithi	NA	1	0	1	wolb	NA	NA	NA	NA	NA	NA	Gotoh03	NA	NA	NA	NA	NA
arachnida	Trombidiformes	Tetranychidae	Eotetranychus	suginamensis	NA	1	0	1	wolb	NA	NA	NA	NA	NA	NA	Gotoh03	NA	NA	NA	NA	NA
arachnida	Trombidiformes	Tetranychidae	Eotetranychus	tiliarium	NA	2	0	1	wolb	NA	NA	NA	NA	NA	NA	Gotoh03	NA	NA	NA	NA	NA
arachnida	Trombidiformes	Tetranychidae	Eotetranychus	uchidai	NA	1	0	1	wolb	NA	NA	NA	NA	NA	NA	Gotoh03	NA	NA	NA	NA	NA
arachnida	Trombidiformes	Tetranychidae	Eotetranychus	uncatus	NA	2	0	1	wolb	NA	NA	NA	NA	NA	NA	Gotoh03	NA	NA	NA	NA	NA
arachnida	Trombidiformes	Tetranychidae	Oligonychus	afrasiaticus	NA	1	0	1	card	NA	NA	NA	NA	NA	NA	ZchoriFein04	NA	NA	NA	NA	NA
arachnida	Trombidiformes	Tetranychidae	Oligonychus	afrasiaticus	NA	1	0	1	wolb	NA	NA	NA	NA	NA	NA	ZchoriFein04	NA	NA	NA	NA	NA
arachnida	Trombidiformes	Tetranychidae	Oligonychus	biharensis	NA	1	0	1	wolb	NA	NA	NA	NA	NA	NA	Gotoh03	NA	NA	NA	NA	NA
arachnida	Trombidiformes	Tetranychidae	Oligonychus	coffeae	NA	1	0	1	wolb	NA	NA	NA	NA	NA	NA	Gotoh03	NA	NA	NA	NA	NA
arachnida	Trombidiformes	Tetranychidae	Oligonychus	formosanus	NA	1	0	1	wolb	NA	NA	NA	NA	NA	NA	Gotoh03	NA	NA	NA	NA	NA
arachnida	Trombidiformes	Tetranychidae	Oligonychus	gotohi	NA	6	5	1	wolb	NA	NA	NA	NA	NA	NA	Gotoh03	NA	NA	NA	NA	NA
arachnida	Trombidiformes	Tetranychidae	Oligonychus	ilicis	NA	1	0	1	wolb	NA	NA	NA	NA	NA	NA	Gotoh03	NA	NA	NA	NA	NA
arachnida	Trombidiformes	Tetranychidae	Panonychus	bambusicola	NA	1	0	1	wolb	NA	NA	NA	NA	NA	NA	Gotoh03	NA	NA	NA	NA	NA
arachnida	Trombidiformes	Tetranychidae	Panonychus	citri	NA	40	0	1	card	China_Jiangsu	Jiangsu_approx	32.9361	118.039	2008	Aug	Chen09	15.4	931.4	31.8	-2.6	Cfa
arachnida	Trombidiformes	Tetranychidae	Panonychus	citri	NA	40	0	1	wolb	China_Jiangsu	Jiangsu_approx	32.9361	118.039	2008	Aug	Chen09	15.4	931.4	31.8	-2.6	Cfa
arachnida	Trombidiformes	Tetranychidae	Panonychus	citri	NA	72	0	1	wolb	NA	NA	NA	NA	NA	NA	Gotoh03	NA	NA	NA	NA	NA
arachnida	Trombidiformes	Tetranychidae	Panonychus	citri	NA	1	0	1	card	US_CA	Riverside	33.953	-117.47	NA	NA	Weeks03	18	464	33.8	4.8	BSk
arachnida	Trombidiformes	Tetranychidae	Panonychus	citri	NA	1	0	1	wolb	US_CA	Riverside	33.953	-117.47	NA	NA	Weeks03	18	464	33.8	4.8	BSk
arachnida	Trombidiformes	Tetranychidae	Panonychus	mori	NA	52	5	1	wolb	NA	NA	NA	NA	NA	NA	Gotoh03	NA	NA	NA	NA	NA
arachnida	Trombidiformes	Tetranychidae	Panonychus	osmanthi	NA	44	0	1	wolb	NA	NA	NA	NA	NA	NA	Gotoh03	NA	NA	NA	NA	NA
arachnida	Trombidiformes	Tetranychidae	Panonychus	thelytokus	NA	1	0	1	wolb	NA	NA	NA	NA	NA	NA	Gotoh03	NA	NA	NA	NA	NA
arachnida	Trombidiformes	Tetranychidae	Panonychus	ulmi	NA	2	0	1	wolb	NA	NA	NA	NA	NA	NA	Gotoh03	NA	NA	NA	NA	NA
arachnida	Trombidiformes	Tetranychidae	Petrobia	harti	Soursob	1	1	1	card	China_Tianjin	Huanyaguan	40.2435	117.438	2005	Aug	Ros12	9.5	1116.2	28.9	-13.4	Dwa
arachnida	Trombidiformes	Tetranychidae	Petrobia	harti	Soursob	1	0	1	wolb	China_Tianjin	Huanyaguan	40.2435	117.438	2005	Aug	Ros12	9.5	1116.2	28.9	-13.4	Dwa
arachnida	Trombidiformes	Tetranychidae	Petrobia	harti	NA	1	1	1	card	US_CA	Riverside	33.953	-117.47	NA	NA	Weeks03	18	464	33.8	4.8	BSk
arachnida	Trombidiformes	Tetranychidae	Petrobia	harti	NA	1	1	1	wolb	US_CA	Riverside	33.953	-117.47	NA	NA	Weeks03	18	464	33.8	4.8	BSk
arachnida	Trombidiformes	Tetranychidae	Petrobia	harti	NA	12	9	1	card	China_Jiangsu	Nanjing_Clover	32.05	118.767	2010	Oct	Zhang16	15.6	897.5	31.9	-1.6	Cfa
arachnida	Trombidiformes	Tetranychidae	Petrobia	harti	NA	12	9	1	wolb	China_Jiangsu	Nanjing_Clover	32.05	118.767	2010	Oct	Zhang16	15.6	897.5	31.9	-1.6	Cfa
arachnida	Trombidiformes	Tetranychidae	Sasanychus	akitanus	NA	2	0	1	wolb	NA	NA	NA	NA	NA	NA	Gotoh03	NA	NA	NA	NA	NA
arachnida	Trombidiformes	Tetranychidae	Schizotetranychus	bambusae	NA	1	0	1	wolb	NA	NA	NA	NA	NA	NA	Gotoh03	NA	NA	NA	NA	NA
arachnida	Trombidiformes	Tetranychidae	Schizotetranychus	cercidiphylli	NA	2	2	1	wolb	NA	NA	NA	NA	NA	NA	Gotoh03	NA	NA	NA	NA	NA
arachnida	Trombidiformes	Tetranychidae	Schizotetranychus	leguminosus	NA	2	0	1	wolb	NA	NA	NA	NA	NA	NA	Gotoh03	NA	NA	NA	NA	NA
arachnida	Trombidiformes	Tetranychidae	Schizotetranychus	longus	NA	3	0	1	wolb	NA	NA	NA	NA	NA	NA	Gotoh03	NA	NA	NA	NA	NA
arachnida	Trombidiformes	Tetranychidae	Schizotetranychus	recki	NA	1	0	1	wolb	NA	NA	NA	NA	NA	NA	Gotoh03	NA	NA	NA	NA	NA
arachnida	Trombidiformes	Tetranychidae	Schizotetranychus	schizopus	NA	2	0	1	wolb	NA	NA	NA	NA	NA	NA	Gotoh03	NA	NA	NA	NA	NA
arachnida	Trombidiformes	Tetranychidae	Tetranychus	cinnabarinus	NA	40	0	1	card	China_Hebei	Hebei_centroid	39.3167	114.426	2008	Jul	Chen09	7.2	1121.1	27.5	-16.9	Dwb
arachnida	Trombidiformes	Tetranychidae	Tetranychus	cinnabarinus	NA	40	4	1	wolb	China_Hebei	Hebei_centroid	39.3167	114.426	2008	Jul	Chen09	7.2	1121.1	27.5	-16.9	Dwb
arachnida	Trombidiformes	Tetranychidae	Tetranychus	cinnabarinus	NA	40	17	1	card	China_Jiangsu	Jiangsu_approx	32.9361	118.039	2008	Jul	Chen09	15.4	931.4	31.8	-2.6	Cfa
arachnida	Trombidiformes	Tetranychidae	Tetranychus	cinnabarinus	NA	40	13	1	wolb	China_Jiangsu	Jiangsu_approx	32.9361	118.039	2008	Jul	Chen09	15.4	931.4	31.8	-2.6	Cfa
arachnida	Trombidiformes	Tetranychidae	Tetranychus	cinnabarinus	NA	40	0	1	card	China_Shanxi	Shanxi_centroid	37.6428	110.157	2008	Jul	Chen09	9	1068	29.1	-14.3	BSk
arachnida	Trombidiformes	Tetranychidae	Tetranychus	cinnabarinus	NA	40	7	1	wolb	China_Shanxi	Shanxi_centroid	37.6428	110.157	2008	Jul	Chen09	9	1068	29.1	-14.3	BSk
arachnida	Trombidiformes	Tetranychidae	Tetranychus	cinnabarinus	NA	40	40	1	card	China_Yunnan	Yunnan_centroid	25.1247	97.3709	2008	Jul	Chen09	23.9	399.1	33.6	9.6	Cwa
arachnida	Trombidiformes	Tetranychidae	Tetranychus	cinnabarinus	NA	40	29	1	wolb	China_Yunnan	Yunnan_centroid	25.1247	97.3709	2008	Jul	Chen09	23.9	399.1	33.6	9.6	Cwa
arachnida	Trombidiformes	Tetranychidae	Tetranychus	cinnabarinus	NA	40	5	1	card	China_Anhui	Anqing_Anhui	30.5333	121.033	NA	NA	Liu06	NA	NA	NA	NA	Cfa
arachnida	Trombidiformes	Tetranychidae	Tetranychus	cinnabarinus	NA	40	0	1	card	China_Beijing	Haidian_Beijing	39.9	116.467	NA	NA	Liu06	12	1073.1	30.8	-9.5	Cwa
arachnida	Trombidiformes	Tetranychidae	Tetranychus	cinnabarinus	NA	40	0	1	card	China_Chongqing	Beibei_Chongqing	29.55	106.55	NA	NA	Liu06	19.1	731.8	34.2	5.9	Cfa
arachnida	Trombidiformes	Tetranychidae	Tetranychus	cinnabarinus	NA	40	0	1	card	China_Fujian	Fuzhou_Fujian	26.0333	119.317	NA	NA	Liu06	20.2	646.2	33.1	7.8	Cfa
arachnida	Trombidiformes	Tetranychidae	Tetranychus	cinnabarinus	NA	40	12	1	card	China_Gansu	Lanzhou_Gansu_	36.05	103.833	NA	NA	Liu06	9.7	968.7	28.9	-12.4	BSk
arachnida	Trombidiformes	Tetranychidae	Tetranychus	cinnabarinus	NA	40	0	1	card	China_Guangdong	Shaoguan_Guangdong	24.8	113.55	NA	NA	Liu06	21	692.6	34.4	6.3	Cfa
arachnida	Trombidiformes	Tetranychidae	Tetranychus	cinnabarinus	NA	40	0	1	card	China_Guangxi	Nanning_Guangxi	22.7833	108.35	NA	NA	Liu06	22.3	560.6	32.6	9.9	Cfa
arachnida	Trombidiformes	Tetranychidae	Tetranychus	cinnabarinus	NA	40	0	1	card	China_Hainan	Danzhou_Hainan	19.8667	109.95	NA	NA	Liu06	24	399.5	32.7	14.5	Aw
arachnida	Trombidiformes	Tetranychidae	Tetranychus	cinnabarinus	NA	40	0	1	card	China_Hebei	Wei_County_Hebei	37.6167	115.133	NA	NA	Liu06	13	1086.3	32.3	-9.2	BSk
arachnida	Trombidiformes	Tetranychidae	Tetranychus	cinnabarinus	NA	40	0	1	card	China_Heilongjiang	Jiamusi_Heilongjiang	47.3833	130.583	NA	NA	Liu06	2.6	1468.2	27.2	-25.7	Dwa
arachnida	Trombidiformes	Tetranychidae	Tetranychus	cinnabarinus	NA	40	7	1	card	China_Henan	Xinye_Henan	32.51	108.827	NA	NA	Liu06	14.3	795.5	30.1	-1.6	Cwa
arachnida	Trombidiformes	Tetranychidae	Tetranychus	cinnabarinus	NA	40	0	1	card	China_Hubei	Chibi_Hubei	29.73	113.606	NA	NA	Liu06	17	864	32.9	0.6	Cfa
arachnida	Trombidiformes	Tetranychidae	Tetranychus	cinnabarinus	NA	40	0	1	card	China_Hunan	Changsha_Hunan	28.2	112.917	NA	NA	Liu06	17.8	886	34.3	1.4	Cfa
arachnida	Trombidiformes	Tetranychidae	Tetranychus	cinnabarinus	NA	40	0	1	card	China_Jiangsu	Binzhou_Shangdong	37.6	118.05	NA	NA	Liu06	12.7	1039.8	31.4	-8.4	BSk
arachnida	Trombidiformes	Tetranychidae	Tetranychus	cinnabarinus	NA	40	8	1	card	China_Jiangsu	Nantong_Jiangsu	32.01	120.736	NA	NA	Liu06	15.1	852.7	30.5	-0.3	Cfa
arachnida	Trombidiformes	Tetranychidae	Tetranychus	cinnabarinus	NA	40	0	1	card	China_Jiangxi	Pengze_Jiangxi	29.15	116.933	NA	NA	Liu06	17.8	832	33.9	1.4	Cfa
arachnida	Trombidiformes	Tetranychidae	Tetranychus	cinnabarinus	NA	40	0	1	card	China_Jilin	Changchun_Jilin	43.9167	125.3	NA	NA	Liu06	5	1377.7	27.9	-22.1	Dwa
arachnida	Trombidiformes	Tetranychidae	Tetranychus	cinnabarinus	NA	40	0	1	card	China_Liaoning	Shenyang_Liaoning	41.8	123.383	NA	NA	Liu06	8.6	1242.6	29.5	-16.5	Dwa
arachnida	Trombidiformes	Tetranychidae	Tetranychus	cinnabarinus	NA	40	0	1	card	China_Ningxia	Yinchuan_Ningxia	38.4667	106.217	NA	NA	Liu06	8.9	1087.4	29.3	-14.6	BWk
arachnida	Trombidiformes	Tetranychidae	Tetranychus	cinnabarinus	NA	40	12	1	card	China_Shaanxi	Xian_Shaanxi	34.2596	108.687	NA	NA	Liu06	15	982.6	34.1	-4.4	BSk
arachnida	Trombidiformes	Tetranychidae	Tetranychus	cinnabarinus	NA	40	26	1	card	China_Shanxi	Yuncheng_Shanxi_	35.03	110.866	NA	NA	Liu06	13.7	1014.4	32	-6.7	Cwa
arachnida	Trombidiformes	Tetranychidae	Tetranychus	cinnabarinus	NA	40	0	1	card	China_Sichuan	Lezhi_Sichuan	30.05	105.033	NA	NA	Liu06	17.1	694.5	30.6	3.9	Cwa
arachnida	Trombidiformes	Tetranychidae	Tetranychus	cinnabarinus	NA	40	0	1	card	China_Zhejiang	Cixi_Zhejiang	30.3	121.383	NA	NA	Liu06	NA	NA	NA	NA	Cfa
arachnida	Trombidiformes	Tetranychidae	Tetranychus	cinnabarinus	NA	40	0	1	card	NA	Huhhot_Inner_Mongolia	40.8	111.633	NA	NA	Liu06	6.4	1195	28.1	-18.2	BSk
arachnida	Trombidiformes	Tetranychidae	Tetranychus	cinnabarinus	NA	40	0	1	card	Taiwan	Gaoxiong	22.64	120.332	NA	NA	Liu06	24.2	331.6	31.6	14.6	Cwa
arachnida	Trombidiformes	Tetranychidae	Tetranychus	cinnabarinus	NA	1	0	1	card	US_CA	Riverside	33.953	-117.47	NA	NA	Weeks03	18	464	33.8	4.8	BSk
arachnida	Trombidiformes	Tetranychidae	Tetranychus	cinnabarinus	NA	1	0	1	wolb	US_CA	Riverside	33.953	-117.47	NA	NA	Weeks03	18	464	33.8	4.8	BSk
arachnida	Trombidiformes	Tetranychidae	Tetranychus	cinnabarinus	NA	40	40	1	card	China_Jiangsu	Zhenjiang_Jiangsu	32.1896	119.389	2007	Jul	Xie10	15.6	932.1	32.4	-1	Cfa
arachnida	Trombidiformes	Tetranychidae	Tetranychus	cinnabarinus	NA	40	34	1	wolb	China_Jiangsu	Zhenjiang_Jiangsu	32.1896	119.389	2007	Jul	Xie10	15.6	932.1	32.4	-1	Cfa
arachnida	Trombidiformes	Tetranychidae	Tetranychus	evansi	Datura_stramonium	16	8	1	wolb	Portugal	Quinta_das_Lameiras	39.0858	-8.99148	2013	Nov	Zele18	16.2	373.9	26.2	8.1	Csa
arachnida	Trombidiformes	Tetranychidae	Tetranychus	evansi	Datura_stramonium	16	1	1	card	Portugal	Quinta_das_Lameiras	39.0858	-8.99148	2013	Nov	Zele18	16.2	373.9	26.2	8.1	Csa
arachnida	Trombidiformes	Tetranychidae	Tetranychus	evansi	Solanum_lycopersicum	14	7	1	wolb	Portugal	University_of_Lisbon	38.7578	-9.15822	2013	Oct	Zele18	16.4	400.8	27.4	8	Csb
arachnida	Trombidiformes	Tetranychidae	Tetranychus	evansi	Solanum_lycopersicum	14	2	1	card	Portugal	University_of_Lisbon	38.7578	-9.15822	2013	Oct	Zele18	16.4	400.8	27.4	8	Csb
arachnida	Trombidiformes	Tetranychidae	Tetranychus	evansi	Solanum_lycopersicum	11	2	1	wolb	Portugal	Graca_Lisbon	38.7139	-9.12954	2013	Dec	Zele18	16.6	400.3	27.7	8.2	Csb
arachnida	Trombidiformes	Tetranychidae	Tetranychus	evansi	Solanum_lycopersicum	11	1	1	card	Portugal	Graca_Lisbon	38.7139	-9.12954	2013	Dec	Zele18	16.6	400.3	27.7	8.2	Csb
arachnida	Trombidiformes	Tetranychidae	Tetranychus	ezoensis	NA	1	0	1	wolb	NA	NA	NA	NA	NA	NA	Gotoh03	NA	NA	NA	NA	NA
arachnida	Trombidiformes	Tetranychidae	Tetranychus	kanzawai	NA	40	0	1	card	China_Jiangsu	Jiangsu_approx	32.9361	118.039	2004	Jun	Chen09	15.4	931.4	31.8	-2.6	Cfa
arachnida	Trombidiformes	Tetranychidae	Tetranychus	kanzawai	NA	40	0	1	wolb	China_Jiangsu	Jiangsu_approx	32.9361	118.039	2004	Jun	Chen09	15.4	931.4	31.8	-2.6	Cfa
arachnida	Trombidiformes	Tetranychidae	Tetranychus	kanzawai	NA	75	22	1	wolb	NA	NA	NA	NA	NA	NA	Gotoh03	NA	NA	NA	NA	NA
arachnida	Trombidiformes	Tetranychidae	Tetranychus	kanzawai	NA	12	4	1	card	China_Shandong	Qingdao_Chineserose	36.0667	120.383	2011	Jun	Zhang16	12.6	925.9	28.8	-4.5	Cwa
arachnida	Trombidiformes	Tetranychidae	Tetranychus	kanzawai	NA	12	5	1	wolb	China_Shandong	Qingdao_Chineserose	36.0667	120.383	2011	Jun	Zhang16	12.6	925.9	28.8	-4.5	Cwa
arachnida	Trombidiformes	Tetranychidae	Tetranychus	ludeni	NA	4	0	1	wolb	NA	NA	NA	NA	NA	NA	Gotoh03	NA	NA	NA	NA	NA
arachnida	Trombidiformes	Tetranychidae	Tetranychus	ludeni	Ipomoea_purpurea	13	6	1	wolb	Portugal	Alvalade_Lisbon	38.7552	-9.14685	2013	Nov	Zele18	16.4	400.8	27.4	8	Csb
arachnida	Trombidiformes	Tetranychidae	Tetranychus	ludeni	Ipomoea_purpurea	13	2	1	card	Portugal	Alvalade_Lisbon	38.7552	-9.14685	2013	Nov	Zele18	16.4	400.8	27.4	8	Csb
arachnida	Trombidiformes	Tetranychidae	Tetranychus	ludeni	Ipomoea_purpurea	13	6	1	wolb	Portugal	Casal_Vale_do_Medo	39.2484	-9.29455	2013	Oct	Zele18	15.2	297.6	22.4	8.2	Csb
arachnida	Trombidiformes	Tetranychidae	Tetranychus	ludeni	Ipomoea_purpurea	13	2	1	card	Portugal	Casal_Vale_do_Medo	39.2484	-9.29455	2013	Oct	Zele18	15.2	297.6	22.4	8.2	Csb
arachnida	Trombidiformes	Tetranychidae	Tetranychus	ludeni	Datura_stramonium	12	0	1	wolb	Portugal	Assafora	38.9047	-9.40859	2013	Sep	Zele18	15	337.2	23.6	7.3	Csb
arachnida	Trombidiformes	Tetranychidae	Tetranychus	ludeni	Datura_stramonium	12	0	1	card	Portugal	Assafora	38.9047	-9.40859	2013	Sep	Zele18	15	337.2	23.6	7.3	Csb
arachnida	Trombidiformes	Tetranychidae	Tetranychus	neocaledonicus	NA	1	0	1	wolb	NA	NA	NA	NA	NA	NA	Gotoh03	NA	NA	NA	NA	NA
arachnida	Trombidiformes	Tetranychidae	Tetranychus	parakanzawai	NA	16	5	1	wolb	NA	NA	NA	NA	NA	NA	Gotoh03	NA	NA	NA	NA	NA
arachnida	Trombidiformes	Tetranychidae	Tetranychus	phaselus	NA	1	0	1	wolb	NA	NA	NA	NA	NA	NA	Gotoh03	NA	NA	NA	NA	NA
arachnida	Trombidiformes	Tetranychidae	Tetranychus	phaselus	NA	12	8	1	card	China_Fujian	Quanzhou_Bean	24.9167	118.583	2014	Jun	Zhang16	21.4	583	32.5	10	Cfa
arachnida	Trombidiformes	Tetranychidae	Tetranychus	phaselus	NA	12	12	1	wolb	China_Fujian	Quanzhou_Bean	24.9167	118.583	2014	Jun	Zhang16	21.4	583	32.5	10	Cfa
arachnida	Trombidiformes	Tetranychidae	Tetranychus	piercei	NA	2	0	1	wolb	NA	NA	NA	NA	NA	NA	Gotoh03	NA	NA	NA	NA	NA
arachnida	Trombidiformes	Tetranychidae	Tetranychus	piercei	NA	12	7	1	card	China_Hunan	Mayang_Kidneybean	27.864	109.801	2014	Jul	Zhang16	17.6	798.8	33	2.4	Cfa
arachnida	Trombidiformes	Tetranychidae	Tetranychus	piercei	NA	12	9	1	wolb	China_Hunan	Mayang_Kidneybean	27.864	109.801	2014	Jul	Zhang16	17.6	798.8	33	2.4	Cfa
arachnida	Trombidiformes	Tetranychidae	Tetranychus	pueraricola	NA	36	1	1	wolb	China_Guangxi	Yongfu_Guangxi	25.01	110	2013	Jul	Chen16	19.8	706.4	33.4	5.3	Cfa
arachnida	Trombidiformes	Tetranychidae	Tetranychus	pueraricola	NA	42	6	1	wolb	China_Heilongjiang	Harbin_Heilongjiang	45.74	126.63	2014	Aug	Chen16	3.4	1491.8	28.2	-26	Dwa
arachnida	Trombidiformes	Tetranychidae	Tetranychus	pueraricola	NA	28	12	1	wolb	China_Heilongjiang	Yanshou_Heilongjiang	45.45	128.34	2014	Aug	Chen16	2.9	1455.3	27.1	-26.8	Dwa
arachnida	Trombidiformes	Tetranychidae	Tetranychus	pueraricola	NA	38	9	1	wolb	China_Hunan	Zhangjiajie_Hunan	29.12	110.48	2013	Jul	Chen16	17.1	801.8	32.8	1.7	Cfa
arachnida	Trombidiformes	Tetranychidae	Tetranychus	pueraricola	NA	48	6	1	wolb	China_Jilin	Changchun_Jilin	43.82	125.33	2014	Jul	Chen16	5	1380.3	27.9	-22.3	Dwa
arachnida	Trombidiformes	Tetranychidae	Tetranychus	pueraricola	NA	78	20	1	wolb	China_Sichuan	Batang_Sichuan	30.01	99.12	2014	Aug	Chen16	11.4	585.8	25.4	-6.1	Cwb
arachnida	Trombidiformes	Tetranychidae	Tetranychus	pueraricola	NA	50	13	1	wolb	China_Sichuan	Chengdu_Sichuan	30.66	104.07	2014	Jun	Chen16	16.4	692.8	29.5	2.7	Cwa
arachnida	Trombidiformes	Tetranychidae	Tetranychus	pueraricola	NA	74	6	1	wolb	China_Yunnan	Haba_Yunan	27.38	99.96	2013	Jul	Chen16	6.9	481.5	17.1	-7.6	Cwb
arachnida	Trombidiformes	Tetranychidae	Tetranychus	pueraricola	NA	49	10	1	wolb	China_Yunnan	Nujiang_Yunan	25.82	98.86	2013	Aug	Chen16	19.5	438	28.4	5.1	Cwb
arachnida	Trombidiformes	Tetranychidae	Tetranychus	pueraricola	NA	37	3	1	wolb	China_Yunnan	Weixi_Yunan	27.49	99.57	2013	Jul	Chen16	14.7	473.3	24.7	0.5	Cwb
arachnida	Trombidiformes	Tetranychidae	Tetranychus	pueraricola	NA	31	9	1	wolb	China_Yunnan	Hutiaoxia_Yunan	27.18	100.11	2013	Jul	Chen16	12.9	460	22.9	-1.1	Cwb
arachnida	Trombidiformes	Tetranychidae	Tetranychus	pueraricola	NA	28	14	1	wolb	China_Yunnan	Yuxi_Yunnan	24.35	102.55	2014	Jul	Chen16	18.6	420.7	28.5	5.6	Cwa
arachnida	Trombidiformes	Tetranychidae	Tetranychus	pueraricola	NA	38	18	1	wolb	NA	NA	NA	NA	NA	NA	Gotoh03	NA	NA	NA	NA	NA
arachnida	Trombidiformes	Tetranychidae	Tetranychus	pueraricola	NA	12	0	1	card	China_Guangxi	Yongfu_Purpleyam	24.9833	109.983	2014	Aug	Zhang16	19.8	703.1	33.3	5.4	Cfa
arachnida	Trombidiformes	Tetranychidae	Tetranychus	pueraricola	NA	12	8	1	wolb	China_Guangxi	Yongfu_Purpleyam	24.9833	109.983	2014	Aug	Zhang16	19.8	703.1	33.3	5.4	Cfa
arachnida	Trombidiformes	Tetranychidae	Tetranychus	takafujii	NA	1	0	1	wolb	NA	NA	NA	NA	NA	NA	Gotoh03	NA	NA	NA	NA	NA
arachnida	Trombidiformes	Tetranychidae	Tetranychus	truncates	NA	40	0	1	card	NA	Xinjiang_centroid	41.4243	75.9657	2004	Jun	Chen09	2.8	1171.6	24	-21.6	BSk
arachnida	Trombidiformes	Tetranychidae	Tetranychus	truncates	NA	40	35	1	wolb	NA	Xinjiang_centroid	41.4243	75.9657	2004	Jun	Chen09	2.8	1171.6	24	-21.6	BSk
arachnida	Trombidiformes	Tetranychidae	Tetranychus	truncatus	NA	12	0	1	card	China_Anhui	Chuzhou_Corn	32.3	118.3	2010	Sep	Zhang16	15.6	915.2	32	-1.9	Cfa
arachnida	Trombidiformes	Tetranychidae	Tetranychus	truncatus	NA	12	2	1	wolb	China_Anhui	Chuzhou_Corn	32.3	118.3	2010	Sep	Zhang16	15.6	915.2	32	-1.9	Cfa
arachnida	Trombidiformes	Tetranychidae	Tetranychus	truncatus	NA	12	0	1	card	China_Gansu	Jiuquan_Eggplant	39.7667	98.5667	2012	Sep	Zhang16	8.1	1074.6	28.9	-14.8	BWk
arachnida	Trombidiformes	Tetranychidae	Tetranychus	truncatus	NA	12	9	1	wolb	China_Gansu	Jiuquan_Eggplant	39.7667	98.5667	2012	Sep	Zhang16	8.1	1074.6	28.9	-14.8	BWk
arachnida	Trombidiformes	Tetranychidae	Tetranychus	truncatus	NA	24	24	1	card	China_Hebei	Cangzhou_Snakegourd	38.3167	116.867	2014	Aug	Zhang16	12.9	1060.1	31.3	-8.2	Dwa
arachnida	Trombidiformes	Tetranychidae	Tetranychus	truncatus	NA	24	24	1	wolb	China_Hebei	Cangzhou_Snakegourd	38.3167	116.867	2014	Aug	Zhang16	12.9	1060.1	31.3	-8.2	Dwa
arachnida	Trombidiformes	Tetranychidae	Tetranychus	truncatus	NA	24	24	1	card	China_Heilongjiang	Harbin_Cotton	45.75	126.633	2011	Aug	Zhang16	3.4	1491.8	28.2	-26	Dwa
arachnida	Trombidiformes	Tetranychidae	Tetranychus	truncatus	NA	24	24	1	wolb	China_Heilongjiang	Harbin_Cotton	45.75	126.633	2011	Aug	Zhang16	3.4	1491.8	28.2	-26	Dwa
arachnida	Trombidiformes	Tetranychidae	Tetranychus	truncatus	NA	12	12	1	card	China_InnerMongolia	Hohhot_Bean	40.8167	111.65	2014	Aug	Zhang16	6.4	1195	28.1	-18.2	BSk
arachnida	Trombidiformes	Tetranychidae	Tetranychus	truncatus	NA	12	12	1	wolb	China_InnerMongolia	Hohhot_Bean	40.8167	111.65	2014	Aug	Zhang16	6.4	1195	28.1	-18.2	BSk
arachnida	Trombidiformes	Tetranychidae	Tetranychus	truncatus	NA	24	3	1	card	China_Jilin	Yanji_JapanCaryatia	42.9	129.5	2011	Aug	Zhang16	5.4	1251.1	26.8	-20.1	Dwb
arachnida	Trombidiformes	Tetranychidae	Tetranychus	truncatus	NA	24	24	1	wolb	China_Jilin	Yanji_JapanCaryatia	42.9	129.5	2011	Aug	Zhang16	5.4	1251.1	26.8	-20.1	Dwb
arachnida	Trombidiformes	Tetranychidae	Tetranychus	truncatus	NA	12	12	1	card	China_Jilin	Changchun_Eggplant	43.9	125.2	2014	Jul	Zhang16	5.2	1363.9	27.9	-21.6	Dwa
arachnida	Trombidiformes	Tetranychidae	Tetranychus	truncatus	NA	12	0	1	wolb	China_Jilin	Changchun_Eggplant	43.9	125.2	2014	Jul	Zhang16	5.2	1363.9	27.9	-21.6	Dwa
arachnida	Trombidiformes	Tetranychidae	Tetranychus	truncatus	NA	23	1	1	card	China_Liaoning	Shenyang_Mungbean	41.8	123.4	2011	Aug	Zhang16	8.6	1242.6	29.5	-16.5	Dwa
arachnida	Trombidiformes	Tetranychidae	Tetranychus	truncatus	NA	23	16	1	wolb	China_Liaoning	Shenyang_Mungbean	41.8	123.4	2011	Aug	Zhang16	8.6	1242.6	29.5	-16.5	Dwa
arachnida	Trombidiformes	Tetranychidae	Tetranychus	truncatus	NA	20	20	1	card	China_Shanxi	Changzhi_Eggplant	36.1833	113.1	2014	Aug	Zhang16	9.8	1003	29.5	-13.2	Cwa
arachnida	Trombidiformes	Tetranychidae	Tetranychus	truncatus	NA	20	20	1	wolb	China_Shanxi	Changzhi_Eggplant	36.1833	113.1	2014	Aug	Zhang16	9.8	1003	29.5	-13.2	Cwa
arachnida	Trombidiformes	Tetranychidae	Tetranychus	truncatus	Glycine_max	19	0	1	wolb	China_Anhui	Suzhou_Anhui	34.065	117.113	2015	Aug	Zhu18	14.9	960.5	31.8	-3.8	Cwa
arachnida	Trombidiformes	Tetranychidae	Tetranychus	truncatus	Glycine_max	19	0	1	card	China_Anhui	Suzhou_Anhui	34.065	117.113	2015	Aug	Zhu18	14.9	960.5	31.8	-3.8	Cwa
arachnida	Trombidiformes	Tetranychidae	Tetranychus	truncatus	Vigna_unguiculata	16	0	1	wolb	China_Anhui	Suzhou_Anhui	34.065	117.113	2015	Aug	Zhu18	14.9	960.5	31.8	-3.8	Cwa
arachnida	Trombidiformes	Tetranychidae	Tetranychus	truncatus	Vigna_unguiculata	16	0	1	card	China_Anhui	Suzhou_Anhui	34.065	117.113	2015	Aug	Zhu18	14.9	960.5	31.8	-3.8	Cwa
arachnida	Trombidiformes	Tetranychidae	Tetranychus	truncatus	Zea_mays	12	2	1	wolb	China_Anhui	Chuzhou_Anhui	32.2682	118.362	2010	Sep	Zhu18	15.6	912	32.1	-1.8	Cfa
arachnida	Trombidiformes	Tetranychidae	Tetranychus	truncatus	Zea_mays	12	0	1	card	China_Anhui	Chuzhou_Anhui	32.2682	118.362	2010	Sep	Zhu18	15.6	912	32.1	-1.8	Cfa
arachnida	Trombidiformes	Tetranychidae	Tetranychus	truncatus	Zea_mays	8	0	1	wolb	China_Anhui	Suzhou_Anhui	34.065	117.113	2015	Aug	Zhu18	14.9	960.5	31.8	-3.8	Cwa
arachnida	Trombidiformes	Tetranychidae	Tetranychus	truncatus	Zea_mays	8	0	1	card	China_Anhui	Suzhou_Anhui	34.065	117.113	2015	Aug	Zhu18	14.9	960.5	31.8	-3.8	Cwa
arachnida	Trombidiformes	Tetranychidae	Tetranychus	truncatus	Solanum_melongena	32	29	1	wolb	China_Fujian	Quanzhou_Fujian	25.3531	118.262	2014	Aug	Zhu18	20.2	591.6	32.2	8	Cfa
arachnida	Trombidiformes	Tetranychidae	Tetranychus	truncatus	Solanum_melongena	32	25	1	card	China_Fujian	Quanzhou_Fujian	25.3531	118.262	2014	Aug	Zhu18	20.2	591.6	32.2	8	Cfa
arachnida	Trombidiformes	Tetranychidae	Tetranychus	truncatus	Phaseolus_vulgaris	22	16	1	wolb	China_Fujian	Quanzhou_Fujian	25.3531	118.262	2014	Aug	Zhu18	20.2	591.6	32.2	8	Cfa
arachnida	Trombidiformes	Tetranychidae	Tetranychus	truncatus	Phaseolus_vulgaris	22	18	1	card	China_Fujian	Quanzhou_Fujian	25.3531	118.262	2014	Aug	Zhu18	20.2	591.6	32.2	8	Cfa
arachnida	Trombidiformes	Tetranychidae	Tetranychus	truncatus	Phaseolus_vulgaris	16	2	1	wolb	China_Gansu	Linxia_Gansu	35.6049	103.259	2016	Sep	Zhu18	6.7	870.7	24.4	-15	Dwb
arachnida	Trombidiformes	Tetranychidae	Tetranychus	truncatus	Solanum_melongena	16	3	1	wolb	China_Gansu	Linxia_Gansu	35.6049	103.259	2016	Sep	Zhu18	6.7	870.7	24.4	-15	Dwb
arachnida	Trombidiformes	Tetranychidae	Tetranychus	truncatus	Zea_mays	16	3	1	wolb	China_Gansu	Linxia_Gansu	35.6049	103.259	2016	Sep	Zhu18	6.7	870.7	24.4	-15	Dwb
arachnida	Trombidiformes	Tetranychidae	Tetranychus	truncatus	Phaseolus_vulgaris	16	0	1	card	China_Gansu	Linxia_Gansu	35.6049	103.259	2016	Sep	Zhu18	6.7	870.7	24.4	-15	Dwb
arachnida	Trombidiformes	Tetranychidae	Tetranychus	truncatus	Solanum_melongena	16	0	1	card	China_Gansu	Linxia_Gansu	35.6049	103.259	2016	Sep	Zhu18	6.7	870.7	24.4	-15	Dwb
arachnida	Trombidiformes	Tetranychidae	Tetranychus	truncatus	Zea_mays	16	0	1	card	China_Gansu	Linxia_Gansu	35.6049	103.259	2016	Sep	Zhu18	6.7	870.7	24.4	-15	Dwb
arachnida	Trombidiformes	Tetranychidae	Tetranychus	truncatus	Phaseolus_vulgaris	16	16	1	wolb	China_Gansu	Zhangye_Gansu	38.5918	100.262	2016	Aug	Zhu18	-0.6	908	17.5	-21.6	BWk
arachnida	Trombidiformes	Tetranychidae	Tetranychus	truncatus	Zea_mays	16	16	1	wolb	China_Gansu	Zhangye_Gansu	38.5918	100.262	2016	Aug	Zhu18	-0.6	908	17.5	-21.6	BWk
arachnida	Trombidiformes	Tetranychidae	Tetranychus	truncatus	Phaseolus_vulgaris	16	3	1	card	China_Gansu	Zhangye_Gansu	38.5918	100.262	2016	Aug	Zhu18	-0.6	908	17.5	-21.6	BWk
arachnida	Trombidiformes	Tetranychidae	Tetranychus	truncatus	Zea_mays	16	6	1	card	China_Gansu	Zhangye_Gansu	38.5918	100.262	2016	Aug	Zhu18	-0.6	908	17.5	-21.6	BWk
arachnida	Trombidiformes	Tetranychidae	Tetranychus	truncatus	Vigna_unguiculata	12	8	1	wolb	China_Gansu	Linxia_Gansu	35.6049	103.259	2016	Sep	Zhu18	6.7	870.7	24.4	-15	Dwb
arachnida	Trombidiformes	Tetranychidae	Tetranychus	truncatus	Vigna_unguiculata	12	0	1	card	China_Gansu	Linxia_Gansu	35.6049	103.259	2016	Sep	Zhu18	6.7	870.7	24.4	-15	Dwb
arachnida	Trombidiformes	Tetranychidae	Tetranychus	truncatus	Phaseolus_vulgaris	11	5	1	wolb	China_Gansu	Lanzhou_Gansu	36.6281	103.335	2016	Sep	Zhu18	6.6	929	25.1	-15	BSk
arachnida	Trombidiformes	Tetranychidae	Tetranychus	truncatus	Phaseolus_vulgaris	11	2	1	card	China_Gansu	Lanzhou_Gansu	36.6281	103.335	2016	Sep	Zhu18	6.6	929	25.1	-15	BSk
arachnida	Trombidiformes	Tetranychidae	Tetranychus	truncatus	Ipomoea_batatas	16	13	1	wolb	China_Guangdong	Guangzhou_Guangdong	23.1755	113.225	2015	Aug	Zhu18	22.3	554.9	33	9.3	Cfa
arachnida	Trombidiformes	Tetranychidae	Tetranychus	truncatus	Solanum_melongena	16	13	1	wolb	China_Guangdong	Guangzhou_Guangdong	23.1755	113.225	2015	Aug	Zhu18	22.3	554.9	33	9.3	Cfa
arachnida	Trombidiformes	Tetranychidae	Tetranychus	truncatus	Amaranthus_mangostanus	16	8	1	wolb	China_Guangdong	Guangzhou_Guangdong	23.1755	113.225	2015	Aug	Zhu18	22.3	554.9	33	9.3	Cfa
arachnida	Trombidiformes	Tetranychidae	Tetranychus	truncatus	Zea_mays	16	7	1	wolb	China_Guangdong	Guangzhou_Guangdong	23.1755	113.225	2015	Aug	Zhu18	22.3	554.9	33	9.3	Cfa
arachnida	Trombidiformes	Tetranychidae	Tetranychus	truncatus	Ipomoea_batatas	16	0	1	card	China_Guangdong	Guangzhou_Guangdong	23.1755	113.225	2015	Aug	Zhu18	22.3	554.9	33	9.3	Cfa
arachnida	Trombidiformes	Tetranychidae	Tetranychus	truncatus	Solanum_melongena	16	0	1	card	China_Guangdong	Guangzhou_Guangdong	23.1755	113.225	2015	Aug	Zhu18	22.3	554.9	33	9.3	Cfa
arachnida	Trombidiformes	Tetranychidae	Tetranychus	truncatus	Amaranthus_mangostanus	16	1	1	card	China_Guangdong	Guangzhou_Guangdong	23.1755	113.225	2015	Aug	Zhu18	22.3	554.9	33	9.3	Cfa
arachnida	Trombidiformes	Tetranychidae	Tetranychus	truncatus	Zea_mays	16	0	1	card	China_Guangdong	Guangzhou_Guangdong	23.1755	113.225	2015	Aug	Zhu18	22.3	554.9	33	9.3	Cfa
arachnida	Trombidiformes	Tetranychidae	Tetranychus	truncatus	Ipomoea_aquatica	16	11	1	wolb	China_Guangdong	Huizhou_Guangdong	22.8305	114.812	2016	Sep	Zhu18	22.5	501.3	31.5	11.1	Cwa
arachnida	Trombidiformes	Tetranychidae	Tetranychus	truncatus	Solanum_melongena	16	10	1	wolb	China_Guangdong	Huizhou_Guangdong	22.8305	114.812	2016	Sep	Zhu18	22.5	501.3	31.5	11.1	Cwa
arachnida	Trombidiformes	Tetranychidae	Tetranychus	truncatus	Amaranthus_mangostanus	16	7	1	wolb	China_Guangdong	Huizhou_Guangdong	22.8305	114.812	2016	Sep	Zhu18	22.5	501.3	31.5	11.1	Cwa
arachnida	Trombidiformes	Tetranychidae	Tetranychus	truncatus	Zea_mays	16	12	1	wolb	China_Guangdong	Huizhou_Guangdong	22.8305	114.812	2016	Sep	Zhu18	22.5	501.3	31.5	11.1	Cwa
arachnida	Trombidiformes	Tetranychidae	Tetranychus	truncatus	Ipomoea_aquatica	16	4	1	card	China_Guangdong	Huizhou_Guangdong	22.8305	114.812	2016	Sep	Zhu18	22.5	501.3	31.5	11.1	Cwa
arachnida	Trombidiformes	Tetranychidae	Tetranychus	truncatus	Solanum_melongena	16	0	1	card	China_Guangdong	Huizhou_Guangdong	22.8305	114.812	2016	Sep	Zhu18	22.5	501.3	31.5	11.1	Cwa
arachnida	Trombidiformes	Tetranychidae	Tetranychus	truncatus	Amaranthus_mangostanus	16	2	1	card	China_Guangdong	Huizhou_Guangdong	22.8305	114.812	2016	Sep	Zhu18	22.5	501.3	31.5	11.1	Cwa
arachnida	Trombidiformes	Tetranychidae	Tetranychus	truncatus	Zea_mays	16	1	1	card	China_Guangdong	Huizhou_Guangdong	22.8305	114.812	2016	Sep	Zhu18	22.5	501.3	31.5	11.1	Cwa
arachnida	Trombidiformes	Tetranychidae	Tetranychus	truncatus	Glycine_max	30	16	1	wolb	China_Hebei	Cangzhou_Hebei	38.3044	116.764	2014	Aug	Zhu18	13	1065.2	31.4	-8.2	Dwa
arachnida	Trombidiformes	Tetranychidae	Tetranychus	truncatus	Glycine_max	30	22	1	card	China_Hebei	Cangzhou_Hebei	38.3044	116.764	2014	Aug	Zhu18	13	1065.2	31.4	-8.2	Dwa
arachnida	Trombidiformes	Tetranychidae	Tetranychus	truncatus	Glycine_max	24	18	1	wolb	China_Hebei	Handan_Hebei	36.5034	114.353	2014	Aug	Zhu18	13.7	1033.7	32.6	-7.7	BSk
arachnida	Trombidiformes	Tetranychidae	Tetranychus	truncatus	Glycine_max	24	0	1	card	China_Hebei	Handan_Hebei	36.5034	114.353	2014	Aug	Zhu18	13.7	1033.7	32.6	-7.7	BSk
arachnida	Trombidiformes	Tetranychidae	Tetranychus	truncatus	Solanum_melongena	19	6	1	wolb	China_Hebei	Cangzhou_Hebei	38.3044	116.764	2014	Aug	Zhu18	13	1065.2	31.4	-8.2	Dwa
arachnida	Trombidiformes	Tetranychidae	Tetranychus	truncatus	Solanum_melongena	19	15	1	card	China_Hebei	Cangzhou_Hebei	38.3044	116.764	2014	Aug	Zhu18	13	1065.2	31.4	-8.2	Dwa
arachnida	Trombidiformes	Tetranychidae	Tetranychus	truncatus	Glycine_max	24	4	1	wolb	China_Heilongjiang	Harbin_Heilongjiang	45.337	126.594	2015	Aug	Zhu18	3.5	1464.2	28	-25.7	Dwa
arachnida	Trombidiformes	Tetranychidae	Tetranychus	truncatus	Gossypium_hirsutum	24	24	1	wolb	China_Heilongjiang	Harbin_Heilongjiang	45.337	126.594	2015	Aug	Zhu18	3.5	1464.2	28	-25.7	Dwa
arachnida	Trombidiformes	Tetranychidae	Tetranychus	truncatus	Glycine_max	24	1	1	card	China_Heilongjiang	Harbin_Heilongjiang	45.337	126.594	2015	Aug	Zhu18	3.5	1464.2	28	-25.7	Dwa
arachnida	Trombidiformes	Tetranychidae	Tetranychus	truncatus	Gossypium_hirsutum	24	24	1	card	China_Heilongjiang	Harbin_Heilongjiang	45.337	126.594	2015	Aug	Zhu18	3.5	1464.2	28	-25.7	Dwa
arachnida	Trombidiformes	Tetranychidae	Tetranychus	truncatus	Zea_mays	20	1	1	wolb	China_Heilongjiang	Harbin_Heilongjiang	45.337	126.594	2015	Aug	Zhu18	3.5	1464.2	28	-25.7	Dwa
arachnida	Trombidiformes	Tetranychidae	Tetranychus	truncatus	Zea_mays	20	0	1	card	China_Heilongjiang	Harbin_Heilongjiang	45.337	126.594	2015	Aug	Zhu18	3.5	1464.2	28	-25.7	Dwa
arachnida	Trombidiformes	Tetranychidae	Tetranychus	truncatus	Lycopersicon_esculentum	14	4	1	wolb	China_Heilongjiang	Harbin_Heilongjiang	45.337	126.594	2015	Aug	Zhu18	3.5	1464.2	28	-25.7	Dwa
arachnida	Trombidiformes	Tetranychidae	Tetranychus	truncatus	Lycopersicon_esculentum	14	0	1	card	China_Heilongjiang	Harbin_Heilongjiang	45.337	126.594	2015	Aug	Zhu18	3.5	1464.2	28	-25.7	Dwa
arachnida	Trombidiformes	Tetranychidae	Tetranychus	truncatus	Ipomoea_aquatica	24	24	1	wolb	China_Hunan	Shimen_Hunan	29.6106	111.399	2014	Aug	Zhu18	17	825.1	32.8	1.4	Cfa
arachnida	Trombidiformes	Tetranychidae	Tetranychus	truncatus	Ipomoea_aquatica	24	8	1	card	China_Hunan	Shimen_Hunan	29.6106	111.399	2014	Aug	Zhu18	17	825.1	32.8	1.4	Cfa
arachnida	Trombidiformes	Tetranychidae	Tetranychus	truncatus	Cucurbita_moschata	32	32	1	wolb	China_InnerMongolia	Hohhot_InnerMongolia	40.7903	111.786	2014	Aug	Zhu18	6.5	1187.2	28.2	-17.9	BSk
arachnida	Trombidiformes	Tetranychidae	Tetranychus	truncatus	Solanum_melongena	32	30	1	wolb	China_InnerMongolia	Hohhot_InnerMongolia	40.7903	111.786	2014	Aug	Zhu18	6.5	1187.2	28.2	-17.9	BSk
arachnida	Trombidiformes	Tetranychidae	Tetranychus	truncatus	Cucurbita_moschata	32	24	1	card	China_InnerMongolia	Hohhot_InnerMongolia	40.7903	111.786	2014	Aug	Zhu18	6.5	1187.2	28.2	-17.9	BSk
arachnida	Trombidiformes	Tetranychidae	Tetranychus	truncatus	Solanum_melongena	32	18	1	card	China_InnerMongolia	Hohhot_InnerMongolia	40.7903	111.786	2014	Aug	Zhu18	6.5	1187.2	28.2	-17.9	BSk
arachnida	Trombidiformes	Tetranychidae	Tetranychus	truncatus	Vigna_unguiculata	32	0	1	wolb	China_Jiangsu	Zhenjiang_Jiangsu	32.0425	119.172	2015	Aug	Zhu18	15.4	912.7	32	-1.4	Cfa
arachnida	Trombidiformes	Tetranychidae	Tetranychus	truncatus	Vigna_unguiculata	32	0	1	card	China_Jiangsu	Zhenjiang_Jiangsu	32.0425	119.172	2015	Aug	Zhu18	15.4	912.7	32	-1.4	Cfa
arachnida	Trombidiformes	Tetranychidae	Tetranychus	truncatus	Solanum_melongena	11	0	1	wolb	China_Jiangsu	Zhenjiang_Jiangsu	32.0425	119.172	2015	Aug	Zhu18	15.4	912.7	32	-1.4	Cfa
arachnida	Trombidiformes	Tetranychidae	Tetranychus	truncatus	Solanum_melongena	11	0	1	card	China_Jiangsu	Zhenjiang_Jiangsu	32.0425	119.172	2015	Aug	Zhu18	15.4	912.7	32	-1.4	Cfa
arachnida	Trombidiformes	Tetranychidae	Tetranychus	truncatus	Solanum_melongena	12	0	1	wolb	China_Jilin	Yitong_Jilin	43.3338	125.405	2011	Aug	Zhu18	4.7	1373.7	27.8	-23.4	Dwa
arachnida	Trombidiformes	Tetranychidae	Tetranychus	truncatus	Solanum_melongena	12	12	1	card	China_Jilin	Yitong_Jilin	43.3338	125.405	2011	Aug	Zhu18	4.7	1373.7	27.8	-23.4	Dwa
arachnida	Trombidiformes	Tetranychidae	Tetranychus	truncatus	Vigna_unguiculata	32	32	1	wolb	China_Liaoning	Shenyang_Liaoning	41.6867	123.372	2016	Aug	Zhu18	8.7	1231.9	29.4	-16.3	Dwa
arachnida	Trombidiformes	Tetranychidae	Tetranychus	truncatus	Vigna_unguiculata	32	15	1	card	China_Liaoning	Shenyang_Liaoning	41.6867	123.372	2016	Aug	Zhu18	8.7	1231.9	29.4	-16.3	Dwa
arachnida	Trombidiformes	Tetranychidae	Tetranychus	truncatus	Lycopersicon_esculentum	16	6	1	wolb	China_Liaoning	Shenyang_Liaoning	41.6867	123.372	2016	Aug	Zhu18	8.7	1231.9	29.4	-16.3	Dwa
arachnida	Trombidiformes	Tetranychidae	Tetranychus	truncatus	Setaria_italic	16	3	1	wolb	China_Liaoning	Shenyang_Liaoning	41.6867	123.372	2016	Aug	Zhu18	8.7	1231.9	29.4	-16.3	Dwa
arachnida	Trombidiformes	Tetranychidae	Tetranychus	truncatus	Glycine_max	16	4	1	wolb	China_Liaoning	Shenyang_Liaoning	41.6867	123.372	2016	Aug	Zhu18	8.7	1231.9	29.4	-16.3	Dwa
arachnida	Trombidiformes	Tetranychidae	Tetranychus	truncatus	Zea_mays	16	0	1	wolb	China_Liaoning	Shenyang_Liaoning	41.6867	123.372	2016	Aug	Zhu18	8.7	1231.9	29.4	-16.3	Dwa
arachnida	Trombidiformes	Tetranychidae	Tetranychus	truncatus	Lycopersicon_esculentum	16	0	1	card	China_Liaoning	Shenyang_Liaoning	41.6867	123.372	2016	Aug	Zhu18	8.7	1231.9	29.4	-16.3	Dwa
arachnida	Trombidiformes	Tetranychidae	Tetranychus	truncatus	Setaria_italic	16	0	1	card	China_Liaoning	Shenyang_Liaoning	41.6867	123.372	2016	Aug	Zhu18	8.7	1231.9	29.4	-16.3	Dwa
arachnida	Trombidiformes	Tetranychidae	Tetranychus	truncatus	Glycine_max	16	0	1	card	China_Liaoning	Shenyang_Liaoning	41.6867	123.372	2016	Aug	Zhu18	8.7	1231.9	29.4	-16.3	Dwa
arachnida	Trombidiformes	Tetranychidae	Tetranychus	truncatus	Zea_mays	16	0	1	card	China_Liaoning	Shenyang_Liaoning	41.6867	123.372	2016	Aug	Zhu18	8.7	1231.9	29.4	-16.3	Dwa
arachnida	Trombidiformes	Tetranychidae	Tetranychus	truncatus	Cucurbita_moschata	12	7	1	wolb	China_Liaoning	Shenyang_Liaoning	41.6867	123.372	2016	Aug	Zhu18	8.7	1231.9	29.4	-16.3	Dwa
arachnida	Trombidiformes	Tetranychidae	Tetranychus	truncatus	Cucurbita_moschata	12	0	1	card	China_Liaoning	Shenyang_Liaoning	41.6867	123.372	2016	Aug	Zhu18	8.7	1231.9	29.4	-16.3	Dwa
arachnida	Trombidiformes	Tetranychidae	Tetranychus	truncatus	Solanum_melongena	8	8	1	wolb	China_Liaoning	Shenyang_Liaoning	41.6867	123.372	2016	Aug	Zhu18	8.7	1231.9	29.4	-16.3	Dwa
arachnida	Trombidiformes	Tetranychidae	Tetranychus	truncatus	Solanum_melongena	8	4	1	card	China_Liaoning	Shenyang_Liaoning	41.6867	123.372	2016	Aug	Zhu18	8.7	1231.9	29.4	-16.3	Dwa
arachnida	Trombidiformes	Tetranychidae	Tetranychus	truncatus	Lycopersicon_esculentum	24	0	1	card	China_Shan	Weifang_Shandong	36.4417	119.122	2015	Aug	Zhu18	12.3	1017.7	30	-8.1	Cwa
arachnida	Trombidiformes	Tetranychidae	Tetranychus	truncatus	Glycine_max	16	0	1	card	China_Shan	Weifang_Shandong	36.4417	119.122	2015	Aug	Zhu18	12.3	1017.7	30	-8.1	Cwa
arachnida	Trombidiformes	Tetranychidae	Tetranychus	truncatus	Zea_mays	12	0	1	card	China_Shan	Weifang_Shandong	36.4417	119.122	2015	Aug	Zhu18	12.3	1017.7	30	-8.1	Cwa
arachnida	Trombidiformes	Tetranychidae	Tetranychus	truncatus	Lycopersicon_esculentum	24	10	1	wolb	China_Shandong	Weifang_Shandong	36.4417	119.122	2015	Aug	Zhu18	12.3	1017.7	30	-8.1	Cwa
arachnida	Trombidiformes	Tetranychidae	Tetranychus	truncatus	Glycine_max	16	6	1	wolb	China_Shandong	Weifang_Shandong	36.4417	119.122	2015	Aug	Zhu18	12.3	1017.7	30	-8.1	Cwa
arachnida	Trombidiformes	Tetranychidae	Tetranychus	truncatus	Zea_mays	12	2	1	wolb	China_Shandong	Weifang_Shandong	36.4417	119.122	2015	Aug	Zhu18	12.3	1017.7	30	-8.1	Cwa
arachnida	Trombidiformes	Tetranychidae	Tetranychus	truncatus	Solanum_melongena	29	29	1	wolb	China_Shanxi	Taigu_Shanxi	37.3978	112.499	2014	Aug	Zhu18	10.4	1013.4	30	-12	BSk
arachnida	Trombidiformes	Tetranychidae	Tetranychus	truncatus	Solanum_melongena	29	18	1	card	China_Shanxi	Taigu_Shanxi	37.3978	112.499	2014	Aug	Zhu18	10.4	1013.4	30	-12	BSk
arachnida	Trombidiformes	Tetranychidae	Tetranychus	truncatus	Solanum_melongena	20	20	1	wolb	China_Shanxi	Changzhi_Shanxi	35.9192	113.574	2014	Aug	Zhu18	8.8	971	27.4	-12.5	Cwa
arachnida	Trombidiformes	Tetranychidae	Tetranychus	truncatus	Solanum_melongena	20	20	1	card	China_Shanxi	Changzhi_Shanxi	35.9192	113.574	2014	Aug	Zhu18	8.8	971	27.4	-12.5	Cwa
arachnida	Trombidiformes	Tetranychidae	Tetranychus	truncatus	Lycopersicon_esculentum	16	3	1	wolb	China_Sichuan	Chengdu_Sichuan	30.7285	103.895	2016	Aug	Zhu18	16.5	695.4	29.7	2.6	Cwa
arachnida	Trombidiformes	Tetranychidae	Tetranychus	truncatus	Solanum_melongena	16	7	1	wolb	China_Sichuan	Chengdu_Sichuan	30.7285	103.895	2016	Aug	Zhu18	16.5	695.4	29.7	2.6	Cwa
arachnida	Trombidiformes	Tetranychidae	Tetranychus	truncatus	Zea_mays	16	7	1	wolb	China_Sichuan	Chengdu_Sichuan	30.7285	103.895	2016	Aug	Zhu18	16.5	695.4	29.7	2.6	Cwa
arachnida	Trombidiformes	Tetranychidae	Tetranychus	truncatus	Lycopersicon_esculentum	16	0	1	card	China_Sichuan	Chengdu_Sichuan	30.7285	103.895	2016	Aug	Zhu18	16.5	695.4	29.7	2.6	Cwa
arachnida	Trombidiformes	Tetranychidae	Tetranychus	truncatus	Solanum_melongena	16	0	1	card	China_Sichuan	Chengdu_Sichuan	30.7285	103.895	2016	Aug	Zhu18	16.5	695.4	29.7	2.6	Cwa
arachnida	Trombidiformes	Tetranychidae	Tetranychus	truncatus	Zea_mays	16	0	1	card	China_Sichuan	Chengdu_Sichuan	30.7285	103.895	2016	Aug	Zhu18	16.5	695.4	29.7	2.6	Cwa
arachnida	Trombidiformes	Tetranychidae	Tetranychus	truncatus	Gossypium_hirsutum	16	5	1	wolb	China_Xinjiang	Tacheng_Xinjiang	44.8212	85.5939	2016	Aug	Zhu18	9.7	1435.2	34.8	-16.6	BWk
arachnida	Trombidiformes	Tetranychidae	Tetranychus	truncatus	Zea_mays	16	2	1	wolb	China_Xinjiang	Tacheng_Xinjiang	44.8212	85.5939	2016	Aug	Zhu18	9.7	1435.2	34.8	-16.6	BWk
arachnida	Trombidiformes	Tetranychidae	Tetranychus	truncatus	Gossypium_hirsutum	16	2	1	card	China_Xinjiang	Tacheng_Xinjiang	44.8212	85.5939	2016	Aug	Zhu18	9.7	1435.2	34.8	-16.6	BWk
arachnida	Trombidiformes	Tetranychidae	Tetranychus	truncatus	Zea_mays	16	0	1	card	China_Xinjiang	Tacheng_Xinjiang	44.8212	85.5939	2016	Aug	Zhu18	9.7	1435.2	34.8	-16.6	BWk
arachnida	Trombidiformes	Tetranychidae	Tetranychus	turkestani	NA	40	0	1	card	NA	Xinjiang_centroid	41.4243	75.9657	2008	Aug	Chen09	2.8	1171.6	24	-21.6	BSk
arachnida	Trombidiformes	Tetranychidae	Tetranychus	turkestani	NA	40	0	1	wolb	NA	Xinjiang_centroid	41.4243	75.9657	2008	Aug	Chen09	2.8	1171.6	24	-21.6	BSk
arachnida	Trombidiformes	Tetranychidae	Tetranychus	urticae	NA	40	0	1	card	China_Liaoning	Liaoning	41	120.07	2008	Aug	Chen09	7.7	1171.2	27.8	-16.7	Dwa
arachnida	Trombidiformes	Tetranychidae	Tetranychus	urticae	NA	40	10	1	wolb	China_Liaoning	Liaoning	41	120.07	2008	Aug	Chen09	7.7	1171.2	27.8	-16.7	Dwa
arachnida	Trombidiformes	Tetranychidae	Tetranychus	urticae	NA	40	0	1	card	China_Shandong	Shandong	36	117.641	2008	Jul	Chen09	13.4	1005.2	31.5	-6.7	Dwa
arachnida	Trombidiformes	Tetranychidae	Tetranychus	urticae	NA	40	31	1	wolb	China_Shandong	Shandong	36	117.641	2008	Jul	Chen09	13.4	1005.2	31.5	-6.7	Dwa
arachnida	Trombidiformes	Tetranychidae	Tetranychus	urticae	red	6	0	1	wolb	NA	NA	NA	NA	NA	NA	Gotoh03	NA	NA	NA	NA	NA
arachnida	Trombidiformes	Tetranychidae	Tetranychus	urticae	green	3	2	1	wolb	NA	NA	NA	NA	NA	NA	Gotoh03	NA	NA	NA	NA	NA
arachnida	Trombidiformes	Tetranychidae	Tetranychus	urticae	cherries	1	1	20	wolb	US_CA	Lodi	38.1305	-121.296	NA	NA	Hoy05	15.4	560.7	32.7	2.5	Csa
arachnida	Trombidiformes	Tetranychidae	Tetranychus	urticae	strawberries	1	1	20	wolb	US_FL	Starke	29.9446	-82.1378	NA	NA	Hoy05	20	544.1	32.7	5.1	Cfa
arachnida	Trombidiformes	Tetranychidae	Tetranychus	urticae	almonds	1	1	20	wolb	US_FL	Tracy	37.7414	-121.479	NA	NA	Hoy05	16	583.7	33.7	2.4	BSk
arachnida	Trombidiformes	Tetranychidae	Tetranychus	urticae	hops	1	1	20	wolb	US_WA	Grandview	46.2509	-119.923	NA	NA	Hoy05	11.3	761	31.5	-3.6	BSk
arachnida	Trombidiformes	Tetranychidae	Tetranychus	urticae	winegrapes	1	1	20	wolb	US_WA	Prosser	46.2074	-119.783	NA	NA	Hoy05	10.4	739.4	30.2	-3.9	BSk
arachnida	Trombidiformes	Tetranychidae	Tetranychus	urticae	NA	1	1	1	wolb	China_Fujian	Fuzhou_Fujian	26.0833	119.178	2008	Aug	Lu12	20.4	647	33.4	7.9	Cfa
arachnida	Trombidiformes	Tetranychidae	Tetranychus	urticae	NA	1	1	1	wolb	China_Fujian	Longyan_Fujian	25.1	116.96	2009	Aug	Lu12	20.3	568.4	32.4	7	Cfa
arachnida	Trombidiformes	Tetranychidae	Tetranychus	urticae	NA	1	1	1	wolb	China_Gansu	Tianshui_Gansu	34.6167	112.472	2008	Aug	Lu12	14.3	985.1	34	-7.4	Cwa
arachnida	Trombidiformes	Tetranychidae	Tetranychus	urticae	NA	1	1	1	wolb	China_Guangdong	Maoming_Guangdong	21.6667	110.858	2009	Aug	Lu12	23.3	475.8	32.4	11.9	Cfa
arachnida	Trombidiformes	Tetranychidae	Tetranychus	urticae	NA	1	1	1	wolb	China_Hebei	Handan_Hebei	36.6	119.248	2008	Aug	Lu12	12.3	1017	30	-7.9	Cwa
arachnida	Trombidiformes	Tetranychidae	Tetranychus	urticae	NA	1	1	1	wolb	China_Henan	Zhengzhou_Henan	34.7667	110.939	2009	Aug	Lu12	13	984.8	31.1	-7.2	Cwa
arachnida	Trombidiformes	Tetranychidae	Tetranychus	urticae	NA	1	1	1	wolb	China_Hunan	Changsha_Hunan	28.2	112.744	2008	Aug	Lu12	17.5	880.3	33.9	1.3	Cfa
arachnida	Trombidiformes	Tetranychidae	Tetranychus	urticae	NA	1	1	1	wolb	China_Jiangsu	Huaian_Jiangsu	33.6	114.413	2008	Aug	Lu12	14.8	930.9	32.1	-3.7	Cwa
arachnida	Trombidiformes	Tetranychidae	Tetranychus	urticae	NA	1	1	1	wolb	China_Jiangsu	Zhenjiang_Jiangsu	32.1833	113.523	2008	Aug	Lu12	14.2	876.7	30.2	-3.2	Cfa
arachnida	Trombidiformes	Tetranychidae	Tetranychus	urticae	NA	1	1	1	wolb	China_Jiangxi	Pengze_Jiangxi	29.9	110.858	2009	Aug	Lu12	16.6	801.6	32.1	1.3	Cfa
arachnida	Trombidiformes	Tetranychidae	Tetranychus	urticae	NA	1	1	1	wolb	China_Jiangxi	Yingtan_Jiangxi	28.2333	108.827	2009	Aug	Lu12	13.1	745.9	27.8	-0.9	Cfa
arachnida	Trombidiformes	Tetranychidae	Tetranychus	urticae	NA	1	1	1	wolb	China_Jilin	Changchun_Jilin	43.9	116.257	2009	Aug	Lu12	1.1	1393.6	26	-26.2	BSk
arachnida	Trombidiformes	Tetranychidae	Tetranychus	urticae	NA	1	1	1	wolb	China_Shanghai	Shanghai	31.05	105.639	2008	Aug	Lu12	16.9	714.4	30.8	3.2	Cwa
arachnida	Trombidiformes	Tetranychidae	Tetranychus	urticae	NA	1	1	1	wolb	China_Shanxi	Taiyuan_Shanxi	37.5	121.196	2009	Aug	Lu12	12.1	953.2	27.9	-5.1	Cwa
arachnida	Trombidiformes	Tetranychidae	Tetranychus	urticae	NA	1	1	1	wolb	China_Shanxi	Xian_Shanxi	34.65	105.693	2008	Aug	Lu12	10.1	846.5	27.2	-7.5	Dwb
arachnida	Trombidiformes	Tetranychidae	Tetranychus	urticae	NA	1	1	1	wolb	China_Shanxi	Yuncheng_Shanxi	35.0167	116.978	2008	Aug	Lu12	14.4	986.9	32.4	-5	Cwa
arachnida	Trombidiformes	Tetranychidae	Tetranychus	urticae	NA	1	1	1	wolb	China_Zhejiang	Cixi_Zhejiang	30.1667	112.884	2008	Aug	Lu12	16.7	852.9	32.2	0.7	Cfa
arachnida	Trombidiformes	Tetranychidae	Tetranychus	urticae	NA	1	1	1	wolb	China_Zhejiang	Huzhou_Zhejiang	30.8667	118.907	2009	Jul	Lu12	16.2	885	32.7	-0.2	Cfa
arachnida	Trombidiformes	Tetranychidae	Tetranychus	urticae	NA	1	1	1	wolb	NA	Qingtongxia_Ningxia	38.0167	116.495	2009	Jul	Lu12	13.2	1071.6	31.9	-7.9	BSk
arachnida	Trombidiformes	Tetranychidae	Tetranychus	urticae	Blackthorn	1	1	1	card	France	Vireux	50.0826	4.68608	2006	Jul	Ros12	9	567.2	21.9	-1.7	Cfb
arachnida	Trombidiformes	Tetranychidae	Tetranychus	urticae	Blackthorn	1	0	1	wolb	France	Vireux	50.0826	4.68608	2006	Jul	Ros12	9	567.2	21.9	-1.7	Cfb
arachnida	Trombidiformes	Tetranychidae	Tetranychus	urticae	Lamiaceae	1	0	1	card	Spain	Valencia	39.4701	-0.431722	2004	May	Ros12	17.3	504.5	29.2	6.6	BSk
arachnida	Trombidiformes	Tetranychidae	Tetranychus	urticae	Lamiaceae	1	1	1	wolb	Spain	Valencia	39.4701	-0.431722	2004	May	Ros12	17.3	504.5	29.2	6.6	BSk
arachnida	Trombidiformes	Tetranychidae	Tetranychus	urticae	NA	40	24	1	wolb	China_Shandong	Taian_Shandong	36.1922	117.066	2008	Aug	Su12	13.8	1010.7	32	-6	Dwb
arachnida	Trombidiformes	Tetranychidae	Tetranychus	urticae	NA	40	11	1	wolb	China_Shandong	Yantai_Shandong	37.4541	121.313	2008	Aug	Su12	12.5	946.1	28.2	-4.4	Cwa
arachnida	Trombidiformes	Tetranychidae	Tetranychus	urticae	NA	40	19	1	wolb	China_Yunnan	Kunming_Yunnan	24.8777	102.671	2009	Aug	Su12	15.9	430.2	25	2.6	Cwb
arachnida	Trombidiformes	Tetranychidae	Tetranychus	urticae	NA	40	24	1	wolb	NA	Huhhot_Inner_Mongolia	40.8403	111.578	2009	Aug	Su12	5.6	1217	27.5	-19.4	BSk
arachnida	Trombidiformes	Tetranychidae	Tetranychus	urticae	NA	1	0	1	card	US_CA	Riverside	33.953	-117.47	NA	NA	Weeks03	18	464	33.8	4.8	BSk
arachnida	Trombidiformes	Tetranychidae	Tetranychus	urticae	NA	1	1	1	wolb	US_CA	Riverside	33.953	-117.47	NA	NA	Weeks03	18	464	33.8	4.8	BSk
arachnida	Trombidiformes	Tetranychidae	Tetranychus	urticae	redform	40	40	1	card	China_Jiangsu	Zhenjiang	32.2	119.417	2007	July	Xie16	15.5	930.7	32.3	-1	Cfa
arachnida	Trombidiformes	Tetranychidae	Tetranychus	urticae	redform	40	34	1	wolb	China_Jiangsu	Zhenjiang	32.2	119.417	2007	July	Xie16	15.5	930.7	32.3	-1	Cfa
arachnida	Trombidiformes	Tetranychidae	Tetranychus	urticae	Red	40	14	1	wolb	China_Fujian	Fujian	25.1	117.02	NA	NA	Yu11	20.6	568.1	32.7	7.2	Cfa
arachnida	Trombidiformes	Tetranychidae	Tetranychus	urticae	Red	40	8	1	wolb	China_Fujian	Fujian	26.1	119.3	NA	NA	Yu11	20.2	646.7	33.2	7.7	Cfa
arachnida	Trombidiformes	Tetranychidae	Tetranychus	urticae	Red	40	6	1	wolb	China_Gansu	Gansu	34.6167	106.7	NA	NA	Yu11	6.9	811.4	23.2	-9.5	Dwb
arachnida	Trombidiformes	Tetranychidae	Tetranychus	urticae	Red	50	11	1	wolb	China_Hebei	Hebei	36.6	114.467	NA	NA	Yu11	13.7	1030.9	32.6	-7.5	BSk
arachnida	Trombidiformes	Tetranychidae	Tetranychus	urticae	Red	40	8	1	wolb	China_Henan	Henan	34.7667	113.667	NA	NA	Yu11	14.5	963	32.4	-4.7	Cwa
arachnida	Trombidiformes	Tetranychidae	Tetranychus	urticae	Red	40	1	1	wolb	China_Hunan	Hunan	28.2	112.983	NA	NA	Yu11	17.7	880	34.4	1.5	Cfa
arachnida	Trombidiformes	Tetranychidae	Tetranychus	urticae	Red	40	15	1	wolb	China_Jiangsu	Jiangsu_approx	32.9361	118.039	NA	NA	Yu11	15.4	931.4	31.8	-2.6	Cfa
arachnida	Trombidiformes	Tetranychidae	Tetranychus	urticae	Red	40	9	1	wolb	China_Jiangxi	Jiangxi	28.2333	117.05	NA	NA	Yu11	18.5	804.4	34	2.5	Cfa
arachnida	Trombidiformes	Tetranychidae	Tetranychus	urticae	Red	40	6	1	wolb	China_Jiangxi	Jiangxi	29.9	116.55	NA	NA	Yu11	17.1	865.1	33.3	1.1	Cfa
arachnida	Trombidiformes	Tetranychidae	Tetranychus	urticae	Green	40	19	1	wolb	China_Liaoning	Liaoning	40.6167	120.683	NA	NA	Yu11	8.7	1128.5	27.9	-14	Dwa
arachnida	Trombidiformes	Tetranychidae	Tetranychus	urticae	Green	40	24	1	wolb	China_Shandong	Shandong	36.6667	117.641	NA	NA	Yu11	13.4	1027.1	31.9	-7.3	Dwa
arachnida	Trombidiformes	Tetranychidae	Tetranychus	urticae	NA	1	0	1	card	NA	NA	NA	NA	NA	NA	ZchoriFein04	NA	NA	NA	NA	NA
arachnida	Trombidiformes	Tetranychidae	Tetranychus	urticae	NA	1	0	1	wolb	NA	NA	NA	NA	NA	NA	ZchoriFein04	NA	NA	NA	NA	NA
arachnida	Trombidiformes	Tetranychidae	Tetranychus	urticae	Solanum_lycopersicum	15	7	1	wolb	France	Montpellier	43.615	3.85985	2013	Oct	Zele18	13.8	576.6	28.4	1.4	Csb
arachnida	Trombidiformes	Tetranychidae	Tetranychus	urticae	Solanum_lycopersicum	15	3	1	card	France	Montpellier	43.615	3.85985	2013	Oct	Zele18	13.8	576.6	28.4	1.4	Csb
arachnida	Trombidiformes	Tetranychidae	Tetranychus	urticae	Cucurbita_pepo	16	14	1	wolb	Portugal	S_Domingos	39.0587	-9.13543	2013	Sep	Zele18	15.4	359.8	24.7	7.5	Csb
arachnida	Trombidiformes	Tetranychidae	Tetranychus	urticae	Cucurbita_pepo	16	3	1	card	Portugal	S_Domingos	39.0587	-9.13543	2013	Sep	Zele18	15.4	359.8	24.7	7.5	Csb
arachnida	Trombidiformes	Tetranychidae	Tetranychus	urticae	Datura_stramonium	14	14	1	wolb	Portugal	Aldeia_da_Mata_Pequena	38.5344	-9.19116	2013	Nov	Zele18	16.6	388.8	27.5	8.3	Csb
arachnida	Trombidiformes	Tetranychidae	Tetranychus	urticae	Datura_stramonium	14	2	1	card	Portugal	Aldeia_da_Mata_Pequena	38.5344	-9.19116	2013	Nov	Zele18	16.6	388.8	27.5	8.3	Csb
arachnida	Trombidiformes	Tetranychidae	Tetranychus	urticae	Solanum_lycopersicum	14	12	1	wolb	Portugal	Casal_Hortelao	38.852	-9.39392	2013	Oct	Zele18	14.8	343.3	23.7	7.1	Csb
arachnida	Trombidiformes	Tetranychidae	Tetranychus	urticae	Solanum_lycopersicum	14	5	1	card	Portugal	Casal_Hortelao	38.852	-9.39392	2013	Oct	Zele18	14.8	343.3	23.7	7.1	Csb
arachnida	Trombidiformes	Tetranychidae	Tetranychus	urticae	Phaseolus_vulgaris	14	14	1	wolb	Portugal	Colares	38.7995	-9.44834	2013	Sep	Zele18	15.3	337.5	23.9	7.7	Csb
arachnida	Trombidiformes	Tetranychidae	Tetranychus	urticae	Phaseolus_vulgaris	14	1	1	card	Portugal	Colares	38.7995	-9.44834	2013	Sep	Zele18	15.3	337.5	23.9	7.7	Csb
arachnida	Trombidiformes	Tetranychidae	Tetranychus	urticae	Phaseolus_vulgaris	14	14	1	wolb	Portugal	S_Domingos	39.0587	-9.13543	2013	Sep	Zele18	15.4	359.8	24.7	7.5	Csb
arachnida	Trombidiformes	Tetranychidae	Tetranychus	urticae	Phaseolus_vulgaris	14	0	1	card	Portugal	S_Domingos	39.0587	-9.13543	2013	Sep	Zele18	15.4	359.8	24.7	7.5	Csb
arachnida	Trombidiformes	Tetranychidae	Tetranychus	urticae	Solanum_melongena	14	13	1	wolb	Portugal	Lourinha	39.2482	-9.27632	2013	Oct	Zele18	15.4	305.4	22.8	8.3	Csb
arachnida	Trombidiformes	Tetranychidae	Tetranychus	urticae	Solanum_melongena	13	0	1	card	Portugal	Lourinha	39.2482	-9.27632	2013	Oct	Zele18	15.4	305.4	22.8	8.3	Csb
arachnida	Trombidiformes	Tetranychidae	Tetranychus	urticae	Solanum_lycopersicum	13	13	1	wolb	Portugal	Ribeira_de_Fraguas	39.3664	-8.85104	2013	Nov	Zele18	16	374.1	26.1	7.7	Csa
arachnida	Trombidiformes	Tetranychidae	Tetranychus	urticae	Solanum_lycopersicum	13	5	1	card	Portugal	Ribeira_de_Fraguas	39.3664	-8.85104	2013	Nov	Zele18	16	374.1	26.1	7.7	Csa
arachnida	Trombidiformes	Tetranychidae	Tetranychus	urticae	Rosa_spp	14	2	1	wolb	Spain	Almeria	36.8557	-2.32037	2013	Nov	Zele18	17.9	476.2	29.5	7.8	BSk
arachnida	Trombidiformes	Tetranychidae	Tetranychus	urticae	Rosa_spp	14	3	1	card	Spain	Almeria	36.8557	-2.32037	2013	Nov	Zele18	17.9	476.2	29.5	7.8	BSk
arachnida	Trombidiformes	Tetranychidae	Tetranychus	urticae	Solanum_melongena	13	2	1	wolb	Spain	Almeria	36.8557	-2.32037	2013	Nov	Zele18	17.9	476.2	29.5	7.8	BSk
arachnida	Trombidiformes	Tetranychidae	Tetranychus	urticae	Solanum_melongena	13	2	1	card	Spain	Almeria	36.8557	-2.32037	2013	Nov	Zele18	17.9	476.2	29.5	7.8	BSk
arachnida	Trombidiformes	Tetranychidae	Tetranychus	viennensis	NA	40	40	1	card	Mongolia	Neimenggu	44	102.65	2008	Aug	Chen09	4.3	1236.3	27.5	-20.6	BWk
arachnida	Trombidiformes	Tetranychidae	Tetranychus	viennensis	NA	40	40	1	wolb	Mongolia	Neimenggu	44	102.65	2008	Aug	Chen09	4.3	1236.3	27.5	-20.6	BWk
arachnida	Trombidiformes	Tetranychidae	Yezonychus	sapporensis	NA	1	0	1	wolb	NA	NA	NA	NA	NA	NA	Gotoh03	NA	NA	NA	NA	NA
branchiopoda	Anostraca	Artemiidae	Artemia	franciscana	Bisexual	10	0	1	wolb	Argentina	Las_Tunas	-31.572	-58.4683	NA	NA	Maniatsi10	18.4	465.5	32.6	6.5	Cfa
branchiopoda	Anostraca	Artemiidae	Artemia	franciscana	Bisexual	10	0	1	wolb	Argentina	Mar_Chiquita	-30.697	-60.9984	NA	NA	Maniatsi10	19.2	458.1	32.8	6.6	Cfa
branchiopoda	Anostraca	Artemiidae	Artemia	franciscana	Bisexual	10	0	1	wolb	Argentina	Santiago_del_Estero	-27.795	-62.8656	NA	NA	Maniatsi10	21.3	479	36.2	6.8	BSh
branchiopoda	Anostraca	Artemiidae	Artemia	franciscana	Bisexual	10	0	1	wolb	Chile	approx	-32.735	-70.3	NA	NA	Maniatsi10	8.1	396.3	21.3	-2.6	Csc
branchiopoda	Anostraca	Artemiidae	Artemia	franciscana	Bisexual	10	0	1	wolb	Chile	Chaxas	-22.7835	-67.9855	NA	NA	Maniatsi10	6	320.2	17.8	-8.2	ET
branchiopoda	Anostraca	Artemiidae	Artemia	franciscana	Bisexual	10	0	1	wolb	Chile	El_Convento	-33.7756	-67.9853	NA	NA	Maniatsi10	16.2	587.8	32.8	0	BWk
branchiopoda	Anostraca	Artemiidae	Artemia	franciscana	Bisexual	10	0	1	wolb	Chile	Iquique	-20.2164	-70.1739	NA	NA	Maniatsi10	18.1	192.6	25	12.8	BWk
branchiopoda	Anostraca	Artemiidae	Artemia	franciscana	Bisexual	10	0	1	wolb	Chile	Llamara	-21.3335	-69.7235	NA	NA	Maniatsi10	17.6	263.5	26.4	9.6	BWk
branchiopoda	Anostraca	Artemiidae	Artemia	franciscana	Bisexual	10	0	1	wolb	Chile	Los_Vilos	-31.9122	-71.5138	NA	NA	Maniatsi10	17	300.7	26.9	8.1	BSk
branchiopoda	Anostraca	Artemiidae	Artemia	franciscana	Parthenogenetic	20	0	1	wolb	Egypt	Borg_el-Arab_	30.9013	110.939	NA	NA	Maniatsi10	16.5	808.6	32	0.6	Cwa
branchiopoda	Anostraca	Artemiidae	Artemia	franciscana	Parthenogenetic	20	0	1	wolb	Egypt	Qarun	29.4761	29.845	NA	NA	Maniatsi10	19.3	574.9	33.8	3.6	BWh
branchiopoda	Anostraca	Artemiidae	Artemia	franciscana	Parthenogenetic	20	0	1	wolb	Greece	approx	39.2817	23.4055	NA	NA	Maniatsi10	NA	NA	NA	NA	Csa
branchiopoda	Anostraca	Artemiidae	Artemia	franciscana	Parthenogenetic	20	0	1	wolb	Greece	Citros	40.2675	30.4248	NA	NA	Maniatsi10	10.4	670.8	26	-2.8	Csb
branchiopoda	Anostraca	Artemiidae	Artemia	franciscana	Parthenogenetic	20	0	1	wolb	Greece	Kessani	41.0289	25.0656	NA	NA	Maniatsi10	14.7	689.2	30.5	1.5	Csb
branchiopoda	Anostraca	Artemiidae	Artemia	franciscana	Parthenogenetic	20	0	1	wolb	Greece	Mesi	40.9826	25.1885	NA	NA	Maniatsi10	14.6	684.9	30.5	1.6	Csb
branchiopoda	Anostraca	Artemiidae	Artemia	franciscana	Parthenogenetic	20	0	1	wolb	Greece	Messolonghi	38.3679	21.4246	NA	NA	Maniatsi10	17.6	592.9	32.3	5.9	Csa
branchiopoda	Anostraca	Artemiidae	Artemia	franciscana	Parthenogenetic	20	0	1	wolb	Greece	Polychnitos	39.0837	26.1807	NA	NA	Maniatsi10	16.8	591	30.2	6.2	Csa
branchiopoda	Anostraca	Artemiidae	Artemia	franciscana	Parthenogenetic	19	0	1	wolb	Greece	Kalloni	39.2332	26.2038	NA	NA	Maniatsi10	16.5	589.8	29.8	5.9	Csa
branchiopoda	Anostraca	Artemiidae	Artemia	franciscana	Parthenogenetic	20	0	1	wolb	Italy	Margherita_di_Savoia	41.3657	16.0839	NA	NA	Maniatsi10	16.2	584.6	30.1	5.1	Csa
branchiopoda	Anostraca	Artemiidae	Artemia	franciscana	Parthenogenetic	20	0	1	wolb	Italy	Torre_Colimena	40.298	17.7397	NA	NA	Maniatsi10	16.8	573.2	30.5	5.9	Csa
branchiopoda	Anostraca	Artemiidae	Artemia	franciscana	Bisexual	10	0	1	wolb	US_CA	San_Francisco_Bay	37.7012	-122.508	NA	NA	Maniatsi10	NA	NA	NA	NA	Csb
branchiopoda	Anostraca	Artemiidae	Artemia	franciscana	Bisexual	10	0	1	wolb	US_UT	-112.761	41.1538	-112.761	NA	NA	Maniatsi10	10.4	940.2	33.4	-8.1	BSk
branchiopoda	Anostraca	Artemiidae	Artemia	persimilis	Bisexual	10	0	1	wolb	Argentina	Buenos_Aires	-34.6157	-58.5035	NA	NA	Maniatsi10	16.6	455.7	29.7	6	Cfa
branchiopoda	Anostraca	Artemiidae	Artemia	persimilis	Parthenogenetic	20	0	1	wolb	India	Tuticorin	8.78058	78.1109	NA	NA	Maniatsi10	29.2	176.4	35.9	22.5	As
branchiopoda	Anostraca	Artemiidae	Artemia	salina	Parthenogenetic	20	0	1	wolb	Egypt	El_Max	31.1447	29.8296	NA	NA	Maniatsi10	20.5	460.4	30.7	9.4	BWh
branchiopoda	Anostraca	Artemiidae	Artemia	salina	Bisexual	10	0	1	wolb	Italy	SantAntioco	39.0448	8.37664	NA	NA	Maniatsi10	16.4	503.5	29	6.7	Csa
branchiopoda	Anostraca	Artemiidae	Artemia	sinica	Bisexual	10	0	1	wolb	China_Shanxi	Yuncheng	35.0171	117.659	NA	NA	Maniatsi10	13.3	971.1	30.7	-5.7	Cwa
branchiopoda	Anostraca	Artemiidae	Artemia	sinica	Parthenogenetic	20	0	1	wolb	Israel	Eilat	29.5532	34.8839	NA	NA	Maniatsi10	22	581.9	36.4	7.9	BWh
branchiopoda	Anostraca	Artemiidae	Artemia	sp.	NA	20	0	1	wolb	China_Jiangsu	Jiangsu	32.9361	118.039	NA	NA	Maniatsi10	15.4	931.4	31.8	-2.6	Cfa
branchiopoda	Anostraca	Artemiidae	Artemia	sp.	NA	20	0	1	wolb	China_Tianjin	Tanggu	39.0299	117.659	NA	NA	Maniatsi10	12.1	1074.6	30.3	-9.2	Dwa
branchiopoda	Anostraca	Artemiidae	Artemia	sp.	NA	20	0	1	wolb	Iran	Maharlu	29.4629	52.7162	NA	NA	Maniatsi10	17.7	775.7	37.5	0.4	BSk
branchiopoda	Anostraca	Artemiidae	Artemia	sp.	NA	20	0	1	wolb	Spain	Odiel	37.2161	-7.02568	NA	NA	Maniatsi10	17.7	488.5	29.4	7.7	Csa
branchiopoda	Anostraca	Artemiidae	Artemia	sp.	NA	20	0	1	wolb	Sri_Lanka	Putallam	8.09186	79.8152	NA	NA	Maniatsi10	28	144.2	34.3	21	As
branchiopoda	Anostraca	Artemiidae	Artemia	sp.	NA	20	0	1	wolb	Turkey	Izmir	26.2437	26.2437	NA	NA	Maniatsi10	21.6	657.7	38.4	3.7	BWh
branchiopoda	Anostraca	Artemiidae	Artemia	tibetiana	Parthenogenetic	20	0	1	wolb	Namibia	Swakopmund	-22.6704	14.5625	NA	NA	Maniatsi10	15.5	174.2	23.4	6.4	BWk
branchiopoda	Anostraca	Artemiidae	Artemia	tibetiana	Bisexual	10	0	1	wolb	Tibet	Lagkor_Co	32.0244	84.0845	NA	NA	Maniatsi10	0	711.1	16.1	-16.6	Dwc
branchiopoda	Anostraca	Artemiidae	Artemia	urmiana	Bisexual	10	0	1	wolb	Iran	Urmia_Lake	37.6142	45.1408	NA	NA	Maniatsi10	11.9	897.2	31.9	-5.3	Csa
branchiopoda	Anostraca	Artemiidae	Artemia	urmiana	Parthenogenetic	20	0	1	wolb	Madagascar	Ankiembe	-23.3783	43.7027	NA	NA	Maniatsi10	24.2	249.8	33.3	14.1	BSh
chilopoda	Lithobiomorpha	Lithobiidae	Lithobius	sp.	NA	1	0	1	wolb	US_IN	WoodnrBloomington	39.1667	-86.4833	1994-1998	Aug-Nov	Werren00	11.5	904.9	29.9	-7.1	Cfa
diplopoda	Chordeumatida	Brachychaeteumatidae	Hungrorasoma	bokori	NA	1	1	1	wolb	Czech_Republic	Hostenice	49.2602	16.7613	2013	NA	Mock16	7.6	713.7	22.7	-5.9	Dfb
diplopoda	Chordeumatida	Brachychaeteumatidae	Hungrorasoma	bokori	NA	1	0	1	wolb	Hungary	Abaliget	46.124	18.1253	2013	NA	Mock16	9.5	757.4	25.1	-5	Cfb
diplopoda	Chordeumatida	Brachychaeteumatidae	Hungrorasoma	bokori	NA	4	0	1	wolb	Slovakia	Liscia_diera	47.921	18.157	2013	NA	Mock16	10.2	761.8	26.7	-4.6	Cfb
diplopoda	Chordeumatida	Brachychaeteumatidae	Hungrorasoma	bokori	NA	2	0	1	wolb	Slovakia	Certova_diera_Slovansky_Raj_National_Park	48.9083	20.3842	2013	NA	Mock16	4.8	704.7	19.6	-9.5	Dfb
diplopoda	Glomerida	Glomeridae	Glomeris	castanea	NA	4	0	1	wolb	France	approx	43.8958	3.83906	1992-1997	NA	Bouchon98	13	592.1	28	0.7	Csb
diplopoda	Unid.	Unid.	Unid.	sp.	NA	1	0	1	card	US_CA	Riverside	33.953	-117.47	NA	NA	Weeks03	18	464	33.8	4.8	BSk
diplopoda	Unid.	Unid.	Unid.	sp.	NA	1	0	1	card	US_CA	Riverside	33.953	-117.47	NA	NA	Weeks03	18	464	33.8	4.8	BSk
diplopoda	Unid.	Unid.	Unid.	sp.	NA	1	0	1	wolb	US_IN	WoodnrBloomington	39.1667	-86.4833	1994-1998	Aug-Nov	Werren00	11.5	904.9	29.9	-7.1	Cfa
entognatha	Collembola	Arrhopalitidae	Arrhopalites	caecus	Symphypleona	5	0	1	wolb	Italy	Red_oak_forest_Fontebuona_Firenze	43.8717	11.286	NA	NA	Tanganelli13	12.2	653.3	27.5	0.4	Csa
entognatha	Collembola	Arrhopalitidae	Arrhopalites	caecus	Symphypleona	4	0	1	wolb	Italy	Live_oak_forest_Murlo_Siena	43.1468	11.3183	NA	NA	Tanganelli13	13.7	594.9	28.6	2.6	Csa
entognatha	Collembola	Arrhopalitidae	Arrhopalites	caecus	Symphypleona	3	0	1	wolb	Italy	Beech_forest_Camaldoli_Arezzo	43.7945	11.8181	NA	NA	Tanganelli13	8.2	619	21.4	-1.8	Cfa
entognatha	Collembola	Arrhopalitidae	Arrhopalites	sericus	Symphypleona	5	0	1	wolb	Italy	Live_oak_forest_Belcaro_Siena	43.3062	11.2891	NA	NA	Tanganelli13	13.7	604.2	28.8	2.5	Csa
entognatha	Collembola	Arrhopalitidae	Arrhopalites	sericus	Symphypleona	5	0	1	wolb	Italy	Live_oak_forest_Murlo_Siena	43.1468	11.3183	NA	NA	Tanganelli13	13.7	594.9	28.6	2.6	Csa
entognatha	Collembola	Arrhopalitidae	Arrhopalites	sericus	Symphypleona	5	0	1	wolb	Italy	Live_oak_forest_Vescovado_Siena	43.1678	11.3904	NA	NA	Tanganelli13	13.9	594.9	29	2.5	Csa
entognatha	Collembola	Entomobryidae	Orchesella	cincta	Entomobryomorpha	22	0	1	wolb	Italy	Live_oak_forest_Belcaro_Siena	43.3062	11.2891	NA	NA	Tanganelli13	13.7	604.2	28.8	2.5	Csa
entognatha	Collembola	Entomobryidae	Orchesella	cincta	Entomobryomorpha	7	0	1	wolb	Italy	Red_oak_forest_Fontebuona_Firenze	43.8717	11.286	NA	NA	Tanganelli13	12.2	653.3	27.5	0.4	Csa
entognatha	Collembola	Isotomidae	Cryptopygus	bipunctatus	Entomobryomorpha	5	0	1	wolb	Italy	Live_oak_forest_Belcaro_Siena	43.3062	11.2891	NA	NA	Tanganelli13	13.7	604.2	28.8	2.5	Csa
entognatha	Collembola	Isotomidae	Cryptopygus	bipunctatus	Entomobryomorpha	5	0	1	wolb	Italy	Sand_dune_Feniglia_Grosseto	42.409	11.2265	NA	NA	Tanganelli13	15.6	539.8	28.4	5.1	Csa
entognatha	Collembola	Isotomidae	Folsomia	candida	NA	1	0	1	card	NA	NA	NA	NA	NA	NA	ZchoriFein04	NA	NA	NA	NA	NA
entognatha	Collembola	Isotomidae	Folsomia	candida	NA	1	1	1	wolb	NA	NA	NA	NA	NA	NA	ZchoriFein04	NA	NA	NA	NA	NA
entognatha	Collembola	Isotomidae	Isotomiella	minor	Entomobryomorpha	10	0	1	wolb	Italy	Live_oak_forest_Belcaro_Siena	43.3062	11.2891	NA	NA	Tanganelli13	13.7	604.2	28.8	2.5	Csa
entognatha	Collembola	Isotomidae	Isotomiella	minor	Entomobryomorpha	5	0	1	wolb	Italy	Live_oak_forest_Murlo_Siena	43.1468	11.3183	NA	NA	Tanganelli13	13.7	594.9	28.6	2.6	Csa
entognatha	Collembola	Isotomidae	Isotomiella	minor	Entomobryomorpha	3	0	1	wolb	Italy	Live_oak_forest_Vescovado_Siena	43.1678	11.3904	NA	NA	Tanganelli13	13.9	594.9	29	2.5	Csa
entognatha	Collembola	Isotomidae	Isotomiella	minor	Entomobryomorpha	3	0	1	wolb	Italy	Red_oak_forest_Fontebuona_Firenze	43.8717	11.286	NA	NA	Tanganelli13	12.2	653.3	27.5	0.4	Csa
entognatha	Collembola	Isotomidae	Parisotoma	notabilis	Entomobryomorpha	14	14	1	wolb	Italy	Live_oak_forest_Belcaro_Siena	43.3062	11.2891	NA	NA	Tanganelli13	13.7	604.2	28.8	2.5	Csa
entognatha	Collembola	Isotomidae	Parisotoma	notabilis	Entomobryomorpha	5	5	1	wolb	Italy	Live_oak_forest_Murlo_Siena	43.1468	11.3183	NA	NA	Tanganelli13	13.7	594.9	28.6	2.6	Csa
entognatha	Collembola	Isotomidae	Parisotoma	notabilis	Entomobryomorpha	5	5	1	wolb	Italy	Live_oak_forest_Vescovado_Siena	43.1678	11.3904	NA	NA	Tanganelli13	13.9	594.9	29	2.5	Csa
entognatha	Collembola	Isotomidae	Parisotoma	notabilis	Entomobryomorpha	5	5	1	wolb	Italy	Open_field_Pian_del_Lago_Siena	43.3442	11.2646	NA	NA	Tanganelli13	13.7	607.2	28.9	2.4	Csa
entognatha	Collembola	Isotomidae	Parisotoma	notabilis	Entomobryomorpha	5	5	1	wolb	Italy	Red_oak_forest_Fontebuona_Firenze	43.8717	11.286	NA	NA	Tanganelli13	12.2	653.3	27.5	0.4	Csa
entognatha	Collembola	Isotomidae	Parisotoma	notabilis	Entomobryomorpha	3	3	1	wolb	Italy	Chestnut_forest_Campiglia_Livorno	43.0601	10.613	NA	NA	Tanganelli13	14.7	567.2	28.2	4.4	Csa
entognatha	Collembola	Neanuridae	Neanura	muscorum	Poduromorpha	5	0	1	wolb	Italy	Live_oak_forest_Murlo_Siena	43.1468	11.3183	NA	NA	Tanganelli13	13.7	594.9	28.6	2.6	Csa
entognatha	Collembola	Neanuridae	Neanura	muscorum	Poduromorpha	5	0	1	wolb	Italy	Live_oak_forest_Vescovado_Siena	43.1678	11.3904	NA	NA	Tanganelli13	13.9	594.9	29	2.5	Csa
entognatha	Collembola	Neanuridae	Neanura	muscorum	Poduromorpha	3	0	1	wolb	Italy	Live_oak_forest_Belcaro_Siena	43.3062	11.2891	NA	NA	Tanganelli13	13.7	604.2	28.8	2.5	Csa
entognatha	Collembola	Neelidae	Megalothorax	minimus	Neelipleona	9	9	1	wolb	Italy	Live_oak_forest_Belcaro_Siena	43.3062	11.2891	NA	NA	Tanganelli13	13.7	604.2	28.8	2.5	Csa
entognatha	Collembola	Neelidae	Megalothorax	minimus	Neelipleona	6	6	1	wolb	Italy	Live_oak_forest_Murlo_Siena	43.1468	11.3183	NA	NA	Tanganelli13	13.7	594.9	28.6	2.6	Csa
entognatha	Collembola	Neelidae	Megalothorax	minimus	Neelipleona	5	5	1	wolb	Italy	Chestnut_forest_Campiglia_Livorno	43.0601	10.613	NA	NA	Tanganelli13	14.7	567.2	28.2	4.4	Csa
entognatha	Collembola	Neelidae	Megalothorax	minimus	Neelipleona	3	3	1	wolb	Italy	Open_field_Pian_del_Lago_Siena	43.3442	11.2646	NA	NA	Tanganelli13	13.7	607.2	28.9	2.4	Csa
entognatha	Collembola	Neelidae	Megalothorax	minimus	Neelipleona	2	2	1	wolb	Italy	Red_oak_forest_Fontebuona_Firenze	43.8717	11.286	NA	NA	Tanganelli13	12.2	653.3	27.5	0.4	Csa
entognatha	Collembola	Neelidae	Megalothorax	minimus	Neelipleona	1	1	1	wolb	Italy	Live_oak_forest_Vescovado_Siena	43.1678	11.3904	NA	NA	Tanganelli13	13.9	594.9	29	2.5	Csa
entognatha	Collembola	Neelidae	Neelus	murinus	Neelipleona	8	8	1	wolb	Italy	Live_oak_forest_Belcaro_Siena	43.3062	11.2891	NA	NA	Tanganelli13	13.7	604.2	28.8	2.5	Csa
entognatha	Collembola	Neelidae	Neelus	murinus	Neelipleona	7	7	1	wolb	Italy	Live_oak_forest_Murlo_Siena	43.1468	11.3183	NA	NA	Tanganelli13	13.7	594.9	28.6	2.6	Csa
entognatha	Collembola	Neelidae	Neelus	murinus	Neelipleona	4	4	1	wolb	Italy	Live_oak_forest_Vescovado_Siena	43.1678	11.3904	NA	NA	Tanganelli13	13.9	594.9	29	2.5	Csa
entognatha	Collembola	Neelidae	Neelus	murinus	Neelipleona	3	3	1	wolb	Italy	Beech_forest_Camaldoli_Arezzo	43.7945	11.8181	NA	NA	Tanganelli13	8.2	619	21.4	-1.8	Cfa
entognatha	Collembola	Neelidae	Neelus	murinus	Neelipleona	3	3	1	wolb	Italy	Open_field_Pian_del_Lago_Siena	43.3442	11.2646	NA	NA	Tanganelli13	13.7	607.2	28.9	2.4	Csa
entognatha	Collembola	Neelidae	Neelus	murinus	Neelipleona	2	2	1	wolb	Italy	Chestnut_forest_Campiglia_Livorno	43.0601	10.613	NA	NA	Tanganelli13	14.7	567.2	28.2	4.4	Csa
entognatha	Collembola	Neelidae	Neelus	murinus	Neelipleona	1	1	1	wolb	Italy	Red_oak_forest_Fontebuona_Firenze	43.8717	11.286	NA	NA	Tanganelli13	12.2	653.3	27.5	0.4	Csa
entognatha	Collembola	Onychiuridae	Onychiurus	sinensis	NA	37	0	1	wolb	Italy	Cremona	45.1333	9.74412	NA	NA	Frati06	13.1	771.8	29.9	-1.8	Cfa
entognatha	Collembola	Onychiuridae	Onychiurus	sp.	NA	1	0	1	card	NA	NA	NA	NA	NA	NA	ZchoriFein04	NA	NA	NA	NA	NA
entognatha	Collembola	Onychiuridae	Onychiurus	sp.	NA	1	0	1	wolb	NA	NA	NA	NA	NA	NA	ZchoriFein04	NA	NA	NA	NA	NA
entognatha	Collembola	Sminthuridae	Unid.	sp.	NA	1	0	1	card	US_CA	Riverside	33.953	-117.47	NA	NA	Weeks03	18	464	33.8	4.8	BSk
entognatha	Collembola	Sminthuridae	Unid.	sp.	NA	1	0	1	card	US_CA	Riverside	33.953	-117.47	NA	NA	Weeks03	18	464	33.8	4.8	BSk
entognatha	Collembola	Sminthuridae	Unid.	sp.	NA	1	0	1	wolb	US_CA	Riverside	33.953	-117.47	NA	NA	Weeks03	18	464	33.8	4.8	BSk
entognatha	Collembola	Sminthuridae	Unid.	sp.	NA	1	0	1	wolb	US_CA	Riverside	33.953	-117.47	NA	NA	Weeks03	18	464	33.8	4.8	BSk
entognatha	Collembola	Tullbergiidae	Mesaphorura	sp.	Poduromorpha	5	0	1	wolb	Italy	Open_field_Pian_del_Lago_Siena	43.3442	11.2646	NA	NA	Tanganelli13	13.7	607.2	28.9	2.4	Csa
entognatha	Collembola	Tullbergiidae	Mesaphorura	sp.	Poduromorpha	5	0	1	wolb	Italy	Sand_dune_Feniglia_Grosseto	42.409	11.2265	NA	NA	Tanganelli13	15.6	539.8	28.4	5.1	Csa
entognatha	Diplura	Parajapygidae	Unid.	sp.	NA	1	0	1	wolb	Brazil	approx	-22.9799	-49.403	NA	NA	deOliveira15	20	241.2	28.8	9.3	Cfa
insecta	Archaeognatha	Machilidae	Machilis	sp.	NA	1	0	1	wolb	US_IN	WoodnrBloomington	39.1667	-86.4833	1994-1998	Aug-Nov	Werren00	11.5	904.9	29.9	-7.1	Cfa
insecta	Blattodea	Blaberidae	Pycnoscella	sapinamenela	NA	1	0	1	wolb	Panama	BarroColoradoIsland_Gamboa_PanamaCity_CerroCampana	9	-79.7	1993-1994	Aug-Nov	Werren95	26.5	57	31.9	22	Am
insecta	Blattodea	Blaberidae	Unid.	sp.	NA	1	1	1	wolb	Brazil	approx	-22.9799	-49.403	NA	NA	deOliveira15	20	241.2	28.8	9.3	Cfa
insecta	Blattodea	Ectobiidae	Blattella	germanica	NA	3	0	1	wolb	Thailand	approx	14.0167	99.0533	1997-2000	Jun-Oct	Kittayapong03	26.2	158.7	35.1	16.8	Aw
insecta	Blattodea	Ectobiidae	Blattella	germanica	NA	4	0	1	wolb	Thailand	Sai_Yok	14.0167	98.6836	1999-2001	NA	Sintupachee06	22.5	123.3	30.8	13.8	Am
insecta	Blattodea	Ectobiidae	Loboptera	decipiens	NA	23	0	1	card	France	Montpellier	43.6	3.83906	2006	NA	Duron08	13.8	576.6	28.4	1.4	Csb
insecta	Blattodea	Ectobiidae	Loboptera	decipiens	NA	23	0	1	wolb	France	Montpellier	43.6	3.83906	2006	NA	Duron08	13.8	576.6	28.4	1.4	Csb
insecta	Blattodea	Blattidae	Parcoblatta	sp.	NA	1	0	1	wolb	US_IN	WoodnrBloomington	39.1667	-86.4833	1994-1998	Aug-Nov	Werren00	11.5	904.9	29.9	-7.1	Cfa
insecta	Blattodea	Ectobiidae	Nyctibora	sp.	NA	1	0	1	wolb	Panama	BarroColoradoIsland_Gamboa_PanamaCity_CerroCampana	9	-79.7	1993-1994	Aug-Nov	Werren95	26.5	57	31.9	22	Am
insecta	Blattodea	Ectobiidae	Unid.	sp.	NA	1	0	1	wolb	Panama	BarroColoradoIsland_Gamboa_PanamaCity_CerroCampana	9	-79.7	1993-1994	Aug-Nov	Werren95	26.5	57	31.9	22	Am
insecta	Blattodea	Polyphagidae	Arenivaga	sp.	NA	1	0	1	card	US_CA	Riverside	33.953	-117.47	NA	NA	Weeks03	18	464	33.8	4.8	BSk
insecta	Blattodea	Polyphagidae	Arenivaga	sp.	NA	1	0	1	wolb	US_CA	Riverside	33.953	-117.47	NA	NA	Weeks03	18	464	33.8	4.8	BSk
insecta	Blattodea	Rhinotermitidae	Reticulitermes	flavipes	NA	1	0	1	wolb	US_IN	WoodnrBloomington	39.1667	-86.4833	1994-1998	Aug-Nov	Werren00	11.5	904.9	29.9	-7.1	Cfa
insecta	Blattodea	Rhinotermitidae	Reticulitermes	hesperus	NA	1	0	1	card	US_CA	Riverside	33.953	-117.47	NA	NA	Weeks03	18	464	33.8	4.8	BSk
insecta	Blattodea	Rhinotermitidae	Reticulitermes	hesperus	NA	1	0	1	wolb	US_CA	Riverside	33.953	-117.47	NA	NA	Weeks03	18	464	33.8	4.8	BSk
insecta	Blattodea	Termitidae	Microcerotermes	sp.	NA	1	0	18	wolb	Iran	Khuzestan	31.5505	47.8863	2007	Apr-Aug	Pourali09	24.4	856.1	44.3	6.1	BWh
insecta	Blattodea	Termitidae	Cubitermes	sp.	T42	57	35	1	wolb	Gabon	Lope_National_Park	-0.441154	11.5226	NA	NA	Roy15	25.4	98.8	31.9	18.7	Aw
insecta	Blattodea	Termitidae	Cubitermes	sp.	T31	55	32	1	wolb	Gabon	Lope_National_Park	-0.441154	11.5226	NA	NA	Roy15	25.4	98.8	31.9	18.7	Aw
insecta	Blattodea	Termitidae	Cubitermes	sp.	T34	50	39	1	wolb	Gabon	Lope_National_Park	-0.441154	11.5226	NA	NA	Roy15	25.4	98.8	31.9	18.7	Aw
insecta	Blattodea	Termitidae	Cubitermes	sp.	T24	49	26	1	wolb	Gabon	Lope_National_Park	-0.441154	11.5226	NA	NA	Roy15	25.4	98.8	31.9	18.7	Aw
insecta	Blattodea	Termitidae	Cubitermes	sp.	T38	48	17	1	wolb	Gabon	Lope_National_Park	-0.441154	11.5226	NA	NA	Roy15	25.4	98.8	31.9	18.7	Aw
insecta	Blattodea	Termitidae	Cubitermes	sp.	T37	42	4	1	wolb	Gabon	Lope_National_Park	-0.441154	11.5226	NA	NA	Roy15	25.4	98.8	31.9	18.7	Aw
insecta	Blattodea	Termitidae	Cubitermes	sp.	TX	42	19	1	wolb	Gabon	Lope_National_Park	-0.441154	11.5226	NA	NA	Roy15	25.4	98.8	31.9	18.7	Aw
insecta	Blattodea	Termitidae	Cubitermes	sp.	T16	37	28	1	wolb	Gabon	Lope_National_Park	-0.441154	11.5226	NA	NA	Roy15	25.4	98.8	31.9	18.7	Aw
insecta	Blattodea	Termitidae	Cubitermes	sp.	T46	33	8	1	wolb	Gabon	Lope_National_Park	-0.441154	11.5226	NA	NA	Roy15	25.4	98.8	31.9	18.7	Aw
insecta	Blattodea	Termitidae	Cubitermes	sp.	T7	27	21	1	wolb	Gabon	Lope_National_Park	-0.441154	11.5226	NA	NA	Roy15	25.4	98.8	31.9	18.7	Aw
insecta	Blattodea	Termitidae	Cubitermes	sp.	TD1	27	12	1	wolb	Gabon	Lope_National_Park	-0.441154	11.5226	NA	NA	Roy15	25.4	98.8	31.9	18.7	Aw
insecta	Blattodea	Termitidae	Cubitermes	sp.	T5	25	5	1	wolb	Gabon	Lope_National_Park	-0.441154	11.5226	NA	NA	Roy15	25.4	98.8	31.9	18.7	Aw
insecta	Blattodea	Termitidae	Cubitermes	sp.	T26	24	5	1	wolb	Gabon	Lope_National_Park	-0.441154	11.5226	NA	NA	Roy15	25.4	98.8	31.9	18.7	Aw
insecta	Blattodea	Termitidae	Cubitermes	sp.	T45	20	9	1	wolb	Gabon	Lope_National_Park	-0.441154	11.5226	NA	NA	Roy15	25.4	98.8	31.9	18.7	Aw
insecta	Blattodea	Termitidae	Cubitermes	sp.	T17	19	16	1	wolb	Gabon	Lope_National_Park	-0.441154	11.5226	NA	NA	Roy15	25.4	98.8	31.9	18.7	Aw
insecta	Coleoptera	Anobiidae	Lasioderma	serricorne	NA	1	0	1	wolb	NA	NA	NA	NA	NA	NA	ZchoriFein04	NA	NA	NA	NA	NA
insecta	Coleoptera	Anobiidae	Lasioderma	serricorne	NA	1	0	1	card	NA	NA	NA	NA	NA	NA	ZchoriFein04	NA	NA	NA	NA	NA
insecta	Coleoptera	Anthicidae	Formicomus	braminus	NA	6	0	1	wolb	Thailand	approx	14.0167	99.0533	1997-2000	Jun-Oct	Kittayapong03	26.2	158.7	35.1	16.8	Aw
insecta	Coleoptera	Anthicidae	Formicomus	sp.	NA	1	0	1	wolb	Thailand	approx	14.0167	99.0533	1997-2000	Jun-Oct	Kittayapong03	26.2	158.7	35.1	16.8	Aw
insecta	Coleoptera	Anthicidae	Notoxus	spatulifer	NA	1	0	1	card	US_CA	Riverside	33.953	-117.47	NA	NA	Weeks03	18	464	33.8	4.8	BSk
insecta	Coleoptera	Anthicidae	Notoxus	spatulifer	NA	1	0	1	wolb	US_CA	Riverside	33.953	-117.47	NA	NA	Weeks03	18	464	33.8	4.8	BSk
insecta	Coleoptera	Bostrichidae	Rhyzopertha	dominica	NA	1	0	1	card	NA	NA	NA	NA	NA	NA	ZchoriFein04	NA	NA	NA	NA	NA
insecta	Coleoptera	Bostrichidae	Rhyzopertha	dominica	NA	1	0	1	wolb	NA	NA	NA	NA	NA	NA	ZchoriFein04	NA	NA	NA	NA	NA
insecta	Coleoptera	Brachyceridae	Lissorhoptrus	oryzophilus	NA	20	20	1	wolb	China_Anhui	Tongcheng_Anhui	31.4	116.823	2001	NA	Chen12	16.1	856.5	32.2	0	Cfa
insecta	Coleoptera	Brachyceridae	Lissorhoptrus	oryzophilus	NA	20	20	1	wolb	China_Guizhou	Xifeng_Guizhou	27.1	106.541	2010	NA	Chen12	15.5	682.5	29.3	2.1	Cfa
insecta	Coleoptera	Brachyceridae	Lissorhoptrus	oryzophilus	NA	20	20	1	wolb	China_Hebei	Tanghai_Hebei	39.2833	118.155	1988	NA	Chen12	11.5	1078.9	30	-10.3	Dwa
insecta	Coleoptera	Brachyceridae	Lissorhoptrus	oryzophilus	NA	20	20	1	wolb	China_Yunnan	Songming_Yunnan	25.35	102.869	2007	NA	Chen12	13.4	437.5	22.6	-0.3	Cwb
insecta	Coleoptera	Brachyceridae	Lissorhoptrus	oryzophilus	NA	27	27	1	wolb	China_Zhejiang	Yueqing_Zhejiang	28.1333	120.88	1993	NA	Chen12	16.1	724.8	29.6	2.4	Cfa
insecta	Coleoptera	Brachyceridae	Lissorhoptrus	oryzophilus	NA	20	20	1	wolb	US_TX	Beaumont	30.0833	-94.1988	NA	NA	Chen12	19.8	633.3	33.4	4.6	Cfa
insecta	Coleoptera	Brachyceridae	Lissorhoptrus	oryzophilus	NA	2	0	1	wolb	Thailand	approx	14.0167	99.0533	1997-2000	Jun-Oct	Kittayapong03	26.2	158.7	35.1	16.8	Aw
insecta	Coleoptera	Brentidae	Brentus	anchorage	NA	1	0	1	wolb	Panama	BarroColoradoIsland_Gamboa_PanamaCity_CerroCampana	9	-79.7	1993-1994	Aug-Nov	Werren95	26.5	57	31.9	22	Am
insecta	Coleoptera	Brentidae	Unid.	sp.	NA	1	0	1	wolb	Brazil	approx	-22.9799	-49.403	NA	NA	deOliveira15	20	241.2	28.8	9.3	Cfa
insecta	Coleoptera	Bruchidae	Acanthoscelides	obtectus	NA	1	0	1	wolb	Japan	Hokkaido	43.121	141.452	NA	NA	Kageyama10	8.1	949.7	25.8	-9.2	Dfb
insecta	Coleoptera	Bruchidae	Callosobruchus	chinensis	kkC98	90	90	1	wolb	Japan	Uchimaki_Kasukabe_Saitama	35.98	139.716	1998	NA	Kondo99	14.8	780	30.7	-1.4	Cfa
insecta	Coleoptera	Bruchidae	Callosobruchus	chinensis	tsC98	80	80	1	wolb	Japan	Mt._Tsukuba_Tsukuba_Ibaraki	36.0333	140.103	1998	NA	Kondo99	13.9	788.3	30.1	-3.2	Cfa
insecta	Coleoptera	Bruchidae	Callosobruchus	chinensis	kzC98	60	60	1	wolb	Japan	Koizumi_Tsukuba_Ibaraki	36.0333	140.082	1998	NA	Kondo99	14	789.4	30.2	-3	Cfa
insecta	Coleoptera	Bruchidae	Callosobruchus	chinensis	mrC98	59	59	1	wolb	Japan	Hatakenaka_Maruoka_Fukui	36.15	136.045	1998	NA	Kondo99	14.1	820.1	30.8	0	Cfa
insecta	Coleoptera	Bruchidae	Callosobruchus	chinensis	mgC98	56	56	1	wolb	Japan	Gokurakuji_Mino_Gifu	35.54	136.879	1998	NA	Kondo99	15.1	837.5	32.2	-0.8	Cfa
insecta	Coleoptera	Bruchidae	Callosobruchus	chinensis	skC98	54	54	1	wolb	Japan	Saiki_Tsukuba_Ibaraki	36.0333	140.106	1998	NA	Kondo99	13.9	788.3	30.1	-3.2	Cfa
insecta	Coleoptera	Bruchidae	Callosobruchus	chinensis	NA	1	0	1	card	NA	NA	NA	NA	NA	NA	ZchoriFein04	NA	NA	NA	NA	NA
insecta	Coleoptera	Bruchidae	Callosobruchus	chinensis	NA	1	1	1	wolb	NA	NA	NA	NA	NA	NA	ZchoriFein04	NA	NA	NA	NA	NA
insecta	Coleoptera	Bruchidae	Callosobruchus	maculatus	NA	1	0	1	wolb	Japan	Miyako	39.6332	141.564	NA	NA	Kageyama10	7.5	854.3	24.6	-8.4	Dfb
insecta	Coleoptera	Buprestidae	Anthaxia	nitidula	NA	19	0	1	card	France	MontBarri	43.6	3.20994	2004	NA	Duron08	12.8	575.8	27.5	0.9	Csb
insecta	Coleoptera	Buprestidae	Anthaxia	nitidula	NA	19	0	1	wolb	France	MontBarri	43.6	3.20994	2004	NA	Duron08	12.8	575.8	27.5	0.9	Csb
insecta	Coleoptera	Buprestidae	Anthaxia	sp.	NA	16	0	1	card	France	MontBarri	43.6	3.20994	2004	NA	Duron08	12.8	575.8	27.5	0.9	Csb
insecta	Coleoptera	Buprestidae	Anthaxia	sp.	NA	16	0	1	wolb	France	MontBarri	43.6	3.20994	2004	NA	Duron08	12.8	575.8	27.5	0.9	Csb
insecta	Coleoptera	Buprestidae	Capnodis	tenebrionis	NA	3	0	1	card	France	Montpellier	43.6	3.83906	2006	NA	Duron08	13.8	576.6	28.4	1.4	Csb
insecta	Coleoptera	Buprestidae	Capnodis	tenebrionis	NA	3	0	1	wolb	France	Montpellier	43.6	3.83906	2006	NA	Duron08	13.8	576.6	28.4	1.4	Csb
insecta	Coleoptera	Cantharidae	Chauligognathus	pennsylvanicus	NA	1	0	1	wolb	US_IN	WoodnrBloomington	39.1667	-86.4833	1994-1998	Aug-Nov	Werren00	11.5	904.9	29.9	-7.1	Cfa
insecta	Coleoptera	Cantharidae	Rhagonycha	fulva	NA	14	0	1	card	UK	London	51.5	-0.242041	2006	NA	Duron08	10.7	477.9	22.8	1.5	Cfb
insecta	Coleoptera	Cantharidae	Rhagonycha	fulva	NA	14	0	1	wolb	UK	London	51.5	-0.242041	2006	NA	Duron08	10.7	477.9	22.8	1.5	Cfb
insecta	Coleoptera	Cantharidae	Rhagonycha	sp.	NA	24	0	1	card	UK	London	51.5	-0.242041	2006	NA	Duron08	10.7	477.9	22.8	1.5	Cfb
insecta	Coleoptera	Cantharidae	Rhagonycha	sp.	NA	24	0	1	wolb	UK	London	51.5	-0.242041	2006	NA	Duron08	10.7	477.9	22.8	1.5	Cfb
insecta	Coleoptera	Carabidae	Agra	sp.	NA	1	0	1	wolb	US_IN	WoodnrBloomington	39.1667	-86.4833	1994-1998	Aug-Nov	Werren00	11.5	904.9	29.9	-7.1	Cfa
insecta	Coleoptera	Carabidae	Agra	sp.	NA	1	0	1	wolb	Panama	BarroColoradoIsland_Gamboa_PanamaCity_CerroCampana	9	-79.7	1993-1994	Aug-Nov	Werren95	26.5	57	31.9	22	Am
insecta	Coleoptera	Carabidae	Chlaenius	circumdatus	NA	1	0	1	wolb	Thailand	approx	14.0167	99.0533	1997-2000	Jun-Oct	Kittayapong03	26.2	158.7	35.1	16.8	Aw
insecta	Coleoptera	Carabidae	Chlaenius	quadricolor	NA	6	0	1	wolb	Thailand	approx	14.0167	99.0533	1997-2000	Jun-Oct	Kittayapong03	26.2	158.7	35.1	16.8	Aw
insecta	Coleoptera	Carabidae	Chlaenius	sp.	NA	3	0	1	wolb	Thailand	approx	14.0167	99.0533	1997-2000	Jun-Oct	Kittayapong03	26.2	158.7	35.1	16.8	Aw
insecta	Coleoptera	Carabidae	Chlaenius	sp.	NA	3	1	1	wolb	Thailand	approx	14.0167	99.0533	1997-2000	Jun-Oct	Kittayapong03	26.2	158.7	35.1	16.8	Aw
insecta	Coleoptera	Carabidae	Chlaenius	sp.	NA	3	0	1	wolb	Thailand	approx	14.0167	99.0533	1997-2000	Jun-Oct	Kittayapong03	26.2	158.7	35.1	16.8	Aw
insecta	Coleoptera	Carabidae	Chlaenius	sp.	NA	3	0	1	wolb	Thailand	approx	14.0167	99.0533	1997-2000	Jun-Oct	Kittayapong03	26.2	158.7	35.1	16.8	Aw
insecta	Coleoptera	Carabidae	Chlaenius	sp.	NA	1	0	1	wolb	Thailand	approx	14.0167	99.0533	1997-2000	Jun-Oct	Kittayapong03	26.2	158.7	35.1	16.8	Aw
insecta	Coleoptera	Carabidae	Coptodear	sp.	NA	1	0	1	wolb	Panama	BarroColoradoIsland_Gamboa_PanamaCity_CerroCampana	9	-79.7	1993-1994	Aug-Nov	Werren95	26.5	57	31.9	22	Am
insecta	Coleoptera	Carabidae	Drypta	japonica	NA	1	0	1	wolb	Thailand	approx	14.0167	99.0533	1997-2000	Jun-Oct	Kittayapong03	26.2	158.7	35.1	16.8	Aw
insecta	Coleoptera	Carabidae	Galerita	sp.	NA	1	0	1	wolb	US_IN	WoodnrBloomington	39.1667	-86.4833	1994-1998	Aug-Nov	Werren00	11.5	904.9	29.9	-7.1	Cfa
insecta	Coleoptera	Carabidae	Harpalus	pennsylvanicus	NA	1	0	1	wolb	US_IN	WoodnrBloomington	39.1667	-86.4833	1994-1998	Aug-Nov	Werren00	11.5	904.9	29.9	-7.1	Cfa
insecta	Coleoptera	Carabidae	Morion	sp.	NA	1	0	1	wolb	Panama	BarroColoradoIsland_Gamboa_PanamaCity_CerroCampana	9	-79.7	1993-1994	Aug-Nov	Werren95	26.5	57	31.9	22	Am
insecta	Coleoptera	Carabidae	Ophionea	indica	NA	15	0	1	wolb	Thailand	approx	14.0167	99.0533	1997-2000	Jun-Oct	Kittayapong03	26.2	158.7	35.1	16.8	Aw
insecta	Coleoptera	Carabidae	Ophionea	ishii	NA	3	0	1	wolb	Thailand	approx	14.0167	99.0533	1997-2000	Jun-Oct	Kittayapong03	26.2	158.7	35.1	16.8	Aw
insecta	Coleoptera	Carabidae	Ophionea	nigrofasciata	NA	4	0	1	wolb	Thailand	approx	14.0167	99.0533	1997-2000	Jun-Oct	Kittayapong03	26.2	158.7	35.1	16.8	Aw
insecta	Coleoptera	Carabidae	Pentagonica	sp.	NA	5	0	1	wolb	Thailand	approx	14.0167	99.0533	1997-2000	Jun-Oct	Kittayapong03	26.2	158.7	35.1	16.8	Aw
insecta	Coleoptera	Carabidae	Pheropsophus	sp.	NA	1	0	1	wolb	Thailand	approx	14.0167	99.0533	1997-2000	Jun-Oct	Kittayapong03	26.2	158.7	35.1	16.8	Aw
insecta	Coleoptera	Carabidae	Scarites	sp.	NA	3	0	1	wolb	Thailand	approx	14.0167	99.0533	1997-2000	Jun-Oct	Kittayapong03	26.2	158.7	35.1	16.8	Aw
insecta	Coleoptera	Carabidae	Submera	latifrons	NA	7	0	1	wolb	Thailand	approx	14.0167	99.0533	1997-2000	Jun-Oct	Kittayapong03	26.2	158.7	35.1	16.8	Aw
insecta	Coleoptera	Carabidae	Unid.	sp.	NA	10	0	1	wolb	Thailand	Sai_Yok	14.0167	98.6836	1999-2001	NA	Sintupachee06	22.5	123.3	30.8	13.8	Am
insecta	Coleoptera	Cerambycidae	Aeolesthes	holocericea	NA	1	0	1	wolb	India	approx	18.5109	74.5264	NA	NA	Prakash06	25.8	292.1	38.7	12.7	BSh
insecta	Coleoptera	Cerambycidae	Clytus	arietis	NA	19	0	1	card	France	MontBarri	43.6	3.20994	2004	NA	Duron08	12.8	575.8	27.5	0.9	Csb
insecta	Coleoptera	Cerambycidae	Clytus	arietis	NA	19	0	1	wolb	France	MontBarri	43.6	3.20994	2004	NA	Duron08	12.8	575.8	27.5	0.9	Csb
insecta	Coleoptera	Cerambycidae	Grammoptera	militaris	NA	1	0	1	card	US_CA	Riverside	33.953	-117.47	NA	NA	Weeks03	18	464	33.8	4.8	BSk
insecta	Coleoptera	Cerambycidae	Grammoptera	militaris	NA	1	1	1	wolb	US_CA	Riverside	33.953	-117.47	NA	NA	Weeks03	18	464	33.8	4.8	BSk
insecta	Coleoptera	Cerambycidae	Leptura	livida	NA	20	0	1	card	France	MontBarri	45.6	3.20994	2004	NA	Duron08	10.4	581.9	25	-1.4	Cfb
insecta	Coleoptera	Cerambycidae	Leptura	livida	NA	20	0	1	wolb	France	MontBarri	45.6	3.20994	2004	NA	Duron08	10.4	581.9	25	-1.4	Cfb
insecta	Coleoptera	Cerambycidae	Stenopterus	sp.	NA	20	0	1	card	France	MontBarri	47.6	3.20994	2004	NA	Duron08	10.4	574.8	24.1	-0.6	Cfb
insecta	Coleoptera	Cerambycidae	Stenopterus	sp.	NA	20	0	1	wolb	France	MontBarri	47.6	3.20994	2004	NA	Duron08	10.4	574.8	24.1	-0.6	Cfb
insecta	Coleoptera	Cerambycidae	Sthenias	grisator	NA	1	0	1	wolb	India	approx	18.5109	74.5264	NA	NA	Prakash06	25.8	292.1	38.7	12.7	BSh
insecta	Coleoptera	Cerambycidae	Tetraopes	tetraopthalmus	NA	1	0	1	wolb	US_IN	WoodnrBloomington	39.1667	-86.4833	1994-1998	Aug-Nov	Werren00	11.5	904.9	29.9	-7.1	Cfa
insecta	Coleoptera	Cerambycidae	Typocerus	velutinus	NA	1	0	1	wolb	US_IN	WoodnrBloomington	39.1667	-86.4833	1994-1998	Aug-Nov	Werren00	11.5	904.9	29.9	-7.1	Cfa
insecta	Coleoptera	Cerambycidae	Unid.	sp.	NA	1	1	1	wolb	Brazil	approx	-22.9799	-49.403	NA	NA	deOliveira15	20	241.2	28.8	9.3	Cfa
insecta	Coleoptera	Cerambycidae	Unid.	sp.	NA	1	0	1	wolb	US_IN	WoodnrBloomington	39.1667	-86.4833	1994-1998	Aug-Nov	Werren00	11.5	904.9	29.9	-7.1	Cfa
insecta	Coleoptera	Ceratocanthidae	Germarostes	globosus	NA	1	0	1	card	US_CA	Riverside	33.953	-117.47	NA	NA	Weeks03	18	464	33.8	4.8	BSk
insecta	Coleoptera	Ceratocanthidae	Germarostes	globosus	NA	1	0	1	wolb	US_CA	Riverside	33.953	-117.47	NA	NA	Weeks03	18	464	33.8	4.8	BSk
insecta	Coleoptera	Cetoniidae	Oxythyrea	noemi	NA	1	0	1	card	NA	NA	NA	NA	NA	NA	ZchoriFein04	NA	NA	NA	NA	NA
insecta	Coleoptera	Cetoniidae	Oxythyrea	noemi	NA	1	1	1	wolb	NA	NA	NA	NA	NA	NA	ZchoriFein04	NA	NA	NA	NA	NA
insecta	Coleoptera	Chrysomelidae	Acromis	sparsa	NA	1	1	1	wolb	Panama	BarroColoradoIsland_Gamboa_PanamaCity_CerroCampana	9	-79.7	1993-1994	Aug-Nov	Werren95	26.5	57	31.9	22	Am
insecta	Coleoptera	Chrysomelidae	Aslamidium	impurum	NA	1	0	1	wolb	Panama	BarroColoradoIsland_Gamboa_PanamaCity_CerroCampana	9	-79.7	1993-1994	Aug-Nov	Werren95	26.5	57	31.9	22	Am
insecta	Coleoptera	Chrysomelidae	Asphaera	reichei	NA	1	0	1	wolb	Panama	BarroColoradoIsland_Gamboa_PanamaCity_CerroCampana	9	-79.7	1993-1994	Aug-Nov	Werren95	26.5	57	31.9	22	Am
insecta	Coleoptera	Chrysomelidae	Aulacophora	frontalis	NA	7	0	1	wolb	Thailand	Sai_Yok	14.0167	98.6836	1999-2001	NA	Sintupachee06	22.5	123.3	30.8	13.8	Am
insecta	Coleoptera	Chrysomelidae	Aulacophora	indica	NA	70	0	1	wolb	Thailand	Sai_Yok	14.0167	98.6836	1999-2001	NA	Sintupachee06	22.5	123.3	30.8	13.8	Am
insecta	Coleoptera	Chrysomelidae	Aulacophora	similis	NA	1	0	1	wolb	Thailand	Sai_Yok	14.0167	98.6836	1999-2001	NA	Sintupachee06	22.5	123.3	30.8	13.8	Am
insecta	Coleoptera	Chrysomelidae	Bruchus	rufimanus	NA	6	0	1	wolb	China_Hubei	Huazhong_Agricultural_University_Wuhan_Hubei_Province	30.4719	114.351	2007-2008	Nov-Oct	Yun11	17.2	890.3	33.6	0.5	Cfa
insecta	Coleoptera	Chrysomelidae	Calyptocephela	brevicornis	NA	1	0	1	wolb	Panama	BarroColoradoIsland_Gamboa_PanamaCity_CerroCampana	9	-79.7	1993-1994	Aug-Nov	Werren95	26.5	57	31.9	22	Am
insecta	Coleoptera	Chrysomelidae	Cephaloleia	sallei	NA	1	0	1	wolb	Panama	BarroColoradoIsland_Gamboa_PanamaCity_CerroCampana	9	-79.7	1993-1994	Aug-Nov	Werren95	26.5	57	31.9	22	Am
insecta	Coleoptera	Chrysomelidae	Cephaloleia	sp.	NA	1	0	1	wolb	Panama	BarroColoradoIsland_Gamboa_PanamaCity_CerroCampana	9	-79.7	1993-1994	Aug-Nov	Werren95	26.5	57	31.9	22	Am
insecta	Coleoptera	Chrysomelidae	Cephaloleia	sp.	NA	1	0	1	wolb	Panama	BarroColoradoIsland_Gamboa_PanamaCity_CerroCampana	9	-79.7	1993-1994	Aug-Nov	Werren95	26.5	57	31.9	22	Am
insecta	Coleoptera	Chrysomelidae	Charidotella	purpurata	NA	1	1	1	wolb	US_IN	WoodnrBloomington	39.1667	-86.4833	1994-1998	Aug-Nov	Werren00	11.5	904.9	29.9	-7.1	Cfa
insecta	Coleoptera	Chrysomelidae	Charidotella	sexpunctata	NA	1	0	1	wolb	US_IN	WoodnrBloomington	39.1667	-86.4833	1994-1998	Aug-Nov	Werren00	11.5	904.9	29.9	-7.1	Cfa
insecta	Coleoptera	Chrysomelidae	Chelymorpha	alternans	NA	3	3	1	wolb	Panama	BarroColoradoIsland_Gamboa_PanamaCity_CerroCampana	9	-79.7	1993-1994	Aug-Nov	Werren95	26.5	57	31.9	22	Am
insecta	Coleoptera	Chrysomelidae	Chelymorpha	cassidea	NA	1	0	1	wolb	US_IN	WoodnrBloomington	39.1667	-86.4833	1994-1998	Aug-Nov	Werren00	11.5	904.9	29.9	-7.1	Cfa
insecta	Coleoptera	Chrysomelidae	Chersinellina	heteropunctata	NA	1	1	1	wolb	Panama	BarroColoradoIsland_Gamboa_PanamaCity_CerroCampana	9	-79.7	1993-1994	Aug-Nov	Werren95	26.5	57	31.9	22	Am
insecta	Coleoptera	Chrysomelidae	Chrysolina	varians	NA	19	0	1	card	France	MontBarri	48.6	3.20994	2004	NA	Duron08	10.3	567.5	24	-0.6	Cfb
insecta	Coleoptera	Chrysomelidae	Chrysolina	varians	NA	19	0	1	wolb	France	MontBarri	48.6	3.20994	2004	NA	Duron08	10.3	567.5	24	-0.6	Cfb
insecta	Coleoptera	Chrysomelidae	Colaspis	sp.	NA	1	0	1	wolb	Panama	BarroColoradoIsland_Gamboa_PanamaCity_CerroCampana	9	-79.7	1993-1994	Aug-Nov	Werren95	26.5	57	31.9	22	Am
insecta	Coleoptera	Chrysomelidae	Coptocycla	leprosa	NA	1	0	1	wolb	Panama	BarroColoradoIsland_Gamboa_PanamaCity_CerroCampana	9	-79.7	1993-1994	Aug-Nov	Werren95	26.5	57	31.9	22	Am
insecta	Coleoptera	Chrysomelidae	Deloyala	guttata	NA	1	0	1	wolb	US_IN	WoodnrBloomington	39.1667	-86.4833	1994-1998	Aug-Nov	Werren00	11.5	904.9	29.9	-7.1	Cfa
insecta	Coleoptera	Chrysomelidae	Diabrotica	sp.	NA	1	0	1	wolb	Panama	BarroColoradoIsland_Gamboa_PanamaCity_CerroCampana	9	-79.7	1993-1994	Aug-Nov	Werren95	26.5	57	31.9	22	Am
insecta	Coleoptera	Chrysomelidae	Diabrotica	undecimpunctata	NA	1	0	1	wolb	US_IN	WoodnrBloomington	39.1667	-86.4833	1994-1998	Aug-Nov	Werren00	11.5	904.9	29.9	-7.1	Cfa
insecta	Coleoptera	Chrysomelidae	Dicladispa	armigera	NA	12	1	1	wolb	Thailand	approx	14.0167	99.0533	1997-2000	Jun-Oct	Kittayapong03	26.2	158.7	35.1	16.8	Aw
insecta	Coleoptera	Chrysomelidae	Disonycha	trifasciata	NA	1	0	1	wolb	Panama	BarroColoradoIsland_Gamboa_PanamaCity_CerroCampana	9	-79.7	1993-1994	Aug-Nov	Werren95	26.5	57	31.9	22	Am
insecta	Coleoptera	Chrysomelidae	Imatidium	thoracicum	NA	1	0	1	wolb	Panama	BarroColoradoIsland_Gamboa_PanamaCity_CerroCampana	9	-79.7	1993-1994	Aug-Nov	Werren95	26.5	57	31.9	22	Am
insecta	Coleoptera	Chrysomelidae	Lema	rufotestacea	NA	4	0	1	wolb	Thailand	Sai_Yok	14.0167	98.6836	1999-2001	NA	Sintupachee06	22.5	123.3	30.8	13.8	Am
insecta	Coleoptera	Chrysomelidae	Lema	sexpunctata	NA	1	0	1	wolb	US_IN	WoodnrBloomington	39.1667	-86.4833	1994-1998	Aug-Nov	Werren00	11.5	904.9	29.9	-7.1	Cfa
insecta	Coleoptera	Chrysomelidae	Leptinotarsa	decemlineata	NA	12	0	1	card	France	Feurs	45.75	4.21373	2006	NA	Duron08	10.8	614.8	25.8	-1.1	Cfb
insecta	Coleoptera	Chrysomelidae	Leptinotarsa	decemlineata	NA	12	0	1	wolb	France	Feurs	45.75	4.21373	2006	NA	Duron08	10.8	614.8	25.8	-1.1	Cfb
insecta	Coleoptera	Chrysomelidae	Leptinotarsa	decemlineata	NA	5	0	1	card	Poland	loc1	51.4667	14.9589	2011	NA	Krawczyk15	8.6	702.5	23.3	-4.1	Cfb
insecta	Coleoptera	Chrysomelidae	Leptinotarsa	decemlineata	NA	5	0	1	wolb	Poland	loc1	51.4667	14.9589	2011	NA	Krawczyk15	8.6	702.5	23.3	-4.1	Cfb
insecta	Coleoptera	Chrysomelidae	Leptinotarsa	decemlineata	NA	5	0	1	card	Poland	loc10	52.6888	18.902	2011	NA	Krawczyk15	8.1	797.1	24.3	-6.6	Dfb
insecta	Coleoptera	Chrysomelidae	Leptinotarsa	decemlineata	NA	5	0	1	wolb	Poland	loc10	52.6888	18.902	2011	NA	Krawczyk15	8.1	797.1	24.3	-6.6	Dfb
insecta	Coleoptera	Chrysomelidae	Leptinotarsa	decemlineata	NA	5	0	1	card	Poland	loc11	53.9852	19.0007	2011	NA	Krawczyk15	7.2	735.4	21.9	-5.6	Dfb
insecta	Coleoptera	Chrysomelidae	Leptinotarsa	decemlineata	NA	5	0	1	wolb	Poland	loc11	53.9852	19.0007	2011	NA	Krawczyk15	7.2	735.4	21.9	-5.6	Dfb
insecta	Coleoptera	Chrysomelidae	Leptinotarsa	decemlineata	NA	5	0	1	card	Poland	loc12	49.4882	20.9851	2011	NA	Krawczyk15	5.7	735.5	21.2	-9	Dfb
insecta	Coleoptera	Chrysomelidae	Leptinotarsa	decemlineata	NA	5	0	1	wolb	Poland	loc12	49.4882	20.9851	2011	NA	Krawczyk15	5.7	735.5	21.2	-9	Dfb
insecta	Coleoptera	Chrysomelidae	Leptinotarsa	decemlineata	NA	5	0	1	card	Poland	loc13	50.4996	21.0702	2011	NA	Krawczyk15	8.1	804.8	24	-7.7	Cfb
insecta	Coleoptera	Chrysomelidae	Leptinotarsa	decemlineata	NA	5	0	1	wolb	Poland	loc13	50.4996	21.0702	2011	NA	Krawczyk15	8.1	804.8	24	-7.7	Cfb
insecta	Coleoptera	Chrysomelidae	Leptinotarsa	decemlineata	NA	5	0	1	card	Poland	loc14	51.9146	20.9396	2011	NA	Krawczyk15	7.7	782.6	23.4	-6.8	Dfb
insecta	Coleoptera	Chrysomelidae	Leptinotarsa	decemlineata	NA	5	0	1	wolb	Poland	loc14	51.9146	20.9396	2011	NA	Krawczyk15	7.7	782.6	23.4	-6.8	Dfb
insecta	Coleoptera	Chrysomelidae	Leptinotarsa	decemlineata	NA	5	0	1	card	Poland	loc15	53.4842	20.9669	2011	NA	Krawczyk15	7.1	863.9	23.4	-8.8	Dfb
insecta	Coleoptera	Chrysomelidae	Leptinotarsa	decemlineata	NA	5	0	1	wolb	Poland	loc15	53.4842	20.9669	2011	NA	Krawczyk15	7.1	863.9	23.4	-8.8	Dfb
insecta	Coleoptera	Chrysomelidae	Leptinotarsa	decemlineata	NA	5	0	1	card	Poland	loc16	49.9644	22.897	2011	NA	Krawczyk15	8.2	772.5	23.4	-6.6	Dfb
insecta	Coleoptera	Chrysomelidae	Leptinotarsa	decemlineata	NA	5	0	1	wolb	Poland	loc16	49.9644	22.897	2011	NA	Krawczyk15	8.2	772.5	23.4	-6.6	Dfb
insecta	Coleoptera	Chrysomelidae	Leptinotarsa	decemlineata	NA	5	0	1	card	Poland	loc17	50.9684	23.0271	2011	NA	Krawczyk15	7.1	808	23.1	-8.3	Dfb
insecta	Coleoptera	Chrysomelidae	Leptinotarsa	decemlineata	NA	5	0	1	wolb	Poland	loc17	50.9684	23.0271	2011	NA	Krawczyk15	7.1	808	23.1	-8.3	Dfb
insecta	Coleoptera	Chrysomelidae	Leptinotarsa	decemlineata	NA	5	0	1	card	Poland	loc18	52.0335	23.0035	2011	NA	Krawczyk15	7.4	809	24	-7.4	Dfb
insecta	Coleoptera	Chrysomelidae	Leptinotarsa	decemlineata	NA	5	0	1	wolb	Poland	loc18	52.0335	23.0035	2011	NA	Krawczyk15	7.4	809	24	-7.4	Dfb
insecta	Coleoptera	Chrysomelidae	Leptinotarsa	decemlineata	NA	5	0	1	card	Poland	loc19	53.024	23.0068	2011	NA	Krawczyk15	6.9	799.8	22.9	-7.7	Dfb
insecta	Coleoptera	Chrysomelidae	Leptinotarsa	decemlineata	NA	5	0	1	wolb	Poland	loc19	53.024	23.0068	2011	NA	Krawczyk15	6.9	799.8	22.9	-7.7	Dfb
insecta	Coleoptera	Chrysomelidae	Leptinotarsa	decemlineata	NA	5	0	1	card	Poland	loc2	52.504	15.019	2011	NA	Krawczyk15	9	771.6	24.4	-5.1	Cfb
insecta	Coleoptera	Chrysomelidae	Leptinotarsa	decemlineata	NA	5	0	1	wolb	Poland	loc2	52.504	15.019	2011	NA	Krawczyk15	9	771.6	24.4	-5.1	Cfb
insecta	Coleoptera	Chrysomelidae	Leptinotarsa	decemlineata	NA	5	0	1	card	Poland	loc20	53.9993	23.0688	2011	NA	Krawczyk15	6.4	796.3	22.1	-7.9	Dfb
insecta	Coleoptera	Chrysomelidae	Leptinotarsa	decemlineata	NA	5	0	1	wolb	Poland	loc20	53.9993	23.0688	2011	NA	Krawczyk15	6.4	796.3	22.1	-7.9	Dfb
insecta	Coleoptera	Chrysomelidae	Leptinotarsa	decemlineata	NA	5	0	1	card	Poland	loc3	53.432	15.0788	2011	NA	Krawczyk15	8.3	737.2	23	-5	Cfb
insecta	Coleoptera	Chrysomelidae	Leptinotarsa	decemlineata	NA	5	0	1	wolb	Poland	loc3	53.432	15.0788	2011	NA	Krawczyk15	8.3	737.2	23	-5	Cfb
insecta	Coleoptera	Chrysomelidae	Leptinotarsa	decemlineata	NA	5	0	1	card	Poland	loc4	50.4732	17.0133	2011	NA	Krawczyk15	8.1	692.6	22.9	-5.2	Dfb
insecta	Coleoptera	Chrysomelidae	Leptinotarsa	decemlineata	NA	5	0	1	wolb	Poland	loc4	50.4732	17.0133	2011	NA	Krawczyk15	8.1	692.6	22.9	-5.2	Dfb
insecta	Coleoptera	Chrysomelidae	Leptinotarsa	decemlineata	NA	5	0	1	card	Poland	loc5	51.9464	17.05	2011	NA	Krawczyk15	8.4	736.9	23.7	-5.6	Cfb
insecta	Coleoptera	Chrysomelidae	Leptinotarsa	decemlineata	NA	5	0	1	wolb	Poland	loc5	51.9464	17.05	2011	NA	Krawczyk15	8.4	736.9	23.7	-5.6	Cfb
insecta	Coleoptera	Chrysomelidae	Leptinotarsa	decemlineata	NA	5	0	1	card	Poland	loc6	52.9239	16.9617	2011	NA	Krawczyk15	7.7	761.6	23.2	-6.3	Cfb
insecta	Coleoptera	Chrysomelidae	Leptinotarsa	decemlineata	NA	5	0	1	wolb	Poland	loc6	52.9239	16.9617	2011	NA	Krawczyk15	7.7	761.6	23.2	-6.3	Cfb
insecta	Coleoptera	Chrysomelidae	Leptinotarsa	decemlineata	NA	5	0	1	card	Poland	loc7	54.51	16.965	2011	NA	Krawczyk15	8.4	778	23.1	-5.3	Cfb
insecta	Coleoptera	Chrysomelidae	Leptinotarsa	decemlineata	NA	5	0	1	wolb	Poland	loc7	54.51	16.965	2011	NA	Krawczyk15	8.4	778	23.1	-5.3	Cfb
insecta	Coleoptera	Chrysomelidae	Leptinotarsa	decemlineata	NA	5	0	1	card	Poland	loc8	50.029	19.0691	2011	NA	Krawczyk15	8.7	780.8	24.7	-6.6	Dfb
insecta	Coleoptera	Chrysomelidae	Leptinotarsa	decemlineata	NA	5	0	1	wolb	Poland	loc8	50.029	19.0691	2011	NA	Krawczyk15	8.7	780.8	24.7	-6.6	Dfb
insecta	Coleoptera	Chrysomelidae	Leptinotarsa	decemlineata	NA	5	0	1	card	Poland	loc9	51.1475	19.1367	2011	NA	Krawczyk15	8.2	760.8	23.4	-6.1	Cfb
insecta	Coleoptera	Chrysomelidae	Leptinotarsa	decemlineata	NA	5	0	1	wolb	Poland	loc9	51.1475	19.1367	2011	NA	Krawczyk15	8.2	760.8	23.4	-6.1	Cfb
insecta	Coleoptera	Chrysomelidae	Lygaria	westermanni	NA	2	0	1	wolb	Thailand	Sai_Yok	14.0167	98.6836	1999-2001	NA	Sintupachee06	22.5	123.3	30.8	13.8	Am
insecta	Coleoptera	Chrysomelidae	Monolepta	signata	NA	33	0	1	wolb	Thailand	approx	14.0167	99.0533	1997-2000	Jun-Oct	Kittayapong03	26.2	158.7	35.1	16.8	Aw
insecta	Coleoptera	Chrysomelidae	Monolepta	signata	NA	19	1	1	wolb	Thailand	Sai_Yok	14.0167	98.6836	1999-2001	NA	Sintupachee06	22.5	123.3	30.8	13.8	Am
insecta	Coleoptera	Chrysomelidae	Oulema	sp.	NA	1	0	1	wolb	Thailand	approx	14.0167	99.0533	1997-2000	Jun-Oct	Kittayapong03	26.2	158.7	35.1	16.8	Aw
insecta	Coleoptera	Chrysomelidae	Phyllotreta	sp.	NA	4	1	1	wolb	Thailand	Sai_Yok	14.0167	98.6836	1999-2001	NA	Sintupachee06	22.5	123.3	30.8	13.8	Am
insecta	Coleoptera	Chrysomelidae	Platyphora	encosma	NA	1	0	1	wolb	Panama	BarroColoradoIsland_Gamboa_PanamaCity_CerroCampana	9	-79.7	1993-1994	Aug-Nov	Werren95	26.5	57	31.9	22	Am
insecta	Coleoptera	Chrysomelidae	Platyphora	sp.	NA	1	0	1	wolb	Panama	BarroColoradoIsland_Gamboa_PanamaCity_CerroCampana	9	-79.7	1993-1994	Aug-Nov	Werren95	26.5	57	31.9	22	Am
insecta	Coleoptera	Chrysomelidae	Polychalma	multicava	NA	1	0	1	wolb	Panama	BarroColoradoIsland_Gamboa_PanamaCity_CerroCampana	9	-79.7	1993-1994	Aug-Nov	Werren95	26.5	57	31.9	22	Am
insecta	Coleoptera	Chrysomelidae	Prosopodonta	dorsata	NA	1	0	1	wolb	Panama	BarroColoradoIsland_Gamboa_PanamaCity_CerroCampana	9	-79.7	1993-1994	Aug-Nov	Werren95	26.5	57	31.9	22	Am
insecta	Coleoptera	Chrysomelidae	Pseudimatidium	sp.	NA	1	0	1	wolb	Panama	BarroColoradoIsland_Gamboa_PanamaCity_CerroCampana	9	-79.7	1993-1994	Aug-Nov	Werren95	26.5	57	31.9	22	Am
insecta	Coleoptera	Chrysomelidae	Pseudimatidium	sp.	NA	1	0	1	wolb	Panama	BarroColoradoIsland_Gamboa_PanamaCity_CerroCampana	9	-79.7	1993-1994	Aug-Nov	Werren95	26.5	57	31.9	22	Am
insecta	Coleoptera	Chrysomelidae	Spaethiella	sp.	NA	1	0	1	wolb	Panama	BarroColoradoIsland_Gamboa_PanamaCity_CerroCampana	9	-79.7	1993-1994	Aug-Nov	Werren95	26.5	57	31.9	22	Am
insecta	Coleoptera	Chrysomelidae	Tapinaspis	wesmaeli	NA	1	0	1	wolb	Panama	BarroColoradoIsland_Gamboa_PanamaCity_CerroCampana	9	-79.7	1993-1994	Aug-Nov	Werren95	26.5	57	31.9	22	Am
insecta	Coleoptera	Chrysomelidae	Unid.	sp.	NA	20	0	1	card	UK	London	51.5	-0.242041	2006	NA	Duron08	10.7	477.9	22.8	1.5	Cfb
insecta	Coleoptera	Chrysomelidae	Unid.	sp.	NA	20	0	1	wolb	UK	London	51.5	-0.242041	2006	NA	Duron08	10.7	477.9	22.8	1.5	Cfb
insecta	Coleoptera	Chrysomelidae	Xyleborus	dispar	NA	5	5	1	wolb	Austria	approx	47.0334	10.7458	NA	NA	Kawasaki16	1.7	580.9	14	-9.5	Dfb
insecta	Coleoptera	Cicindelidae	Cicindela	sexguttata	NA	3	0	1	wolb	US_IN	WoodnrBloomington	39.1667	-86.4833	1994-1998	Aug-Nov	Werren00	11.5	904.9	29.9	-7.1	Cfa
insecta	Coleoptera	Cicindelidae	Cicindela	sp.	NA	1	0	1	wolb	Thailand	approx	14.0167	99.0533	1997-2000	Jun-Oct	Kittayapong03	26.2	158.7	35.1	16.8	Aw
insecta	Coleoptera	Ciidae	Cis	sp.	NA	1	0	1	wolb	US_IN	WoodnrBloomington	39.1667	-86.4833	1994-1998	Aug-Nov	Werren00	11.5	904.9	29.9	-7.1	Cfa
insecta	Coleoptera	Ciidae	Cis	sp.	NA	1	0	1	wolb	US_IN	WoodnrBloomington	39.1667	-86.4833	1994-1998	Aug-Nov	Werren00	11.5	904.9	29.9	-7.1	Cfa
insecta	Coleoptera	Cleridae	Priocera	sp.	NA	1	1	1	wolb	Panama	BarroColoradoIsland_Gamboa_PanamaCity_CerroCampana	9	-79.7	1993-1994	Aug-Nov	Werren95	26.5	57	31.9	22	Am
insecta	Coleoptera	Cleridae	Unid.	sp.	NA	1	0	1	card	US_CA	Riverside	33.953	-117.47	NA	NA	Weeks03	18	464	33.8	4.8	BSk
insecta	Coleoptera	Cleridae	Unid.	sp.	NA	1	0	1	wolb	US_CA	Riverside	33.953	-117.47	NA	NA	Weeks03	18	464	33.8	4.8	BSk
insecta	Coleoptera	Coccinellidae	Adalia	bipunctata	NA	70	0	1	wolb	New_Zealand	QueenstownNZ	-45.0167	168.657	NA	NA	Weinert07	8	424.3	20.3	-2.3	Cfb
insecta	Coleoptera	Coccinellidae	Adalia	bipunctata	NA	84	0	1	wolb	UK	Edinburgh	55.9167	-3.27555	NA	NA	Weinert07	8.6	421.3	19.1	0	Cfb
insecta	Coleoptera	Coccinellidae	Adalia	decempunctata	NA	46	0	1	wolb	Italy	Piedmonte	45.8288	6.80204	NA	NA	Weinert07	-4.2	527.8	6.7	-13.8	ET
insecta	Coleoptera	Coccinellidae	Adalia	decempunctata	NA	112	0	1	wolb	UK	Edinburgh	55.9167	-3.27555	NA	NA	Weinert07	8.6	421.3	19.1	0	Cfb
insecta	Coleoptera	Coccinellidae	Anatis	ocellata	NA	163	0	1	wolb	UK	Thetford_Norfolk	52.42	0.687961	NA	NA	Weinert07	9.3	484.7	20.6	-0.5	Cfb
insecta	Coleoptera	Coccinellidae	Anatis	ocellata	NA	13	0	1	wolb	UK	Edinburgh	55.9167	-3.27555	NA	NA	Weinert07	8.6	421.3	19.1	0	Cfb
insecta	Coleoptera	Coccinellidae	Anisosticta	novemdecimpunctata	NA	123	0	1	wolb	Germany	Poen	54.1667	10.3772	NA	NA	Weinert07	8	602.8	20.7	-2.6	Cfb
insecta	Coleoptera	Coccinellidae	Anisosticta	novemdecimpunctata	NA	46	0	1	wolb	UK	Essex	51.5685	0.357558	NA	NA	Weinert07	10.2	486.4	22	0.8	Cfb
insecta	Coleoptera	Coccinellidae	Aphidecta	obliterata	NA	44	0	1	wolb	UK	Edinburgh	55.9167	-3.27555	NA	NA	Weinert07	8.6	421.3	19.1	0	Cfb
insecta	Coleoptera	Coccinellidae	Brumoides	lineatus	NA	2	0	1	wolb	Thailand	approx	14.0167	99.0533	1997-2000	Jun-Oct	Kittayapong03	26.2	158.7	35.1	16.8	Aw
insecta	Coleoptera	Coccinellidae	Brumoides	suturalis	NA	1	0	1	wolb	Thailand	approx	14.0167	99.0533	1997-2000	Jun-Oct	Kittayapong03	26.2	158.7	35.1	16.8	Aw
insecta	Coleoptera	Coccinellidae	Calvia	quatuordecimguttata	NA	9	0	1	card	UK	London	51.5	-0.242041	2006	NA	Duron08	10.7	477.9	22.8	1.5	Cfb
insecta	Coleoptera	Coccinellidae	Calvia	quatuordecimguttata	NA	9	0	1	wolb	UK	London	51.5	-0.242041	2006	NA	Duron08	10.7	477.9	22.8	1.5	Cfb
insecta	Coleoptera	Coccinellidae	Calvia	quatuordecimguttata	NA	57	1	1	wolb	Germany	Poen	54.1667	10.3772	NA	NA	Weinert07	8	602.8	20.7	-2.6	Cfb
insecta	Coleoptera	Coccinellidae	Chilocorus	bipustulatus	NA	20	1	1	wolb	Italy	Verona	45.45	10.7762	NA	NA	Weinert07	12.6	737.7	28.6	-1.8	Cfa
insecta	Coleoptera	Coccinellidae	Chilocorus	bipustulatus	NA	15	0	1	wolb	UK	Hathersage_Derby	53.33	-1.66413	NA	NA	Weinert07	8.9	461.4	20	0.3	Cfb
insecta	Coleoptera	Coccinellidae	Coccidula	rufa	NA	49	28	1	wolb	Germany	Poen	54.1667	10.3772	NA	NA	Weinert07	8	602.8	20.7	-2.6	Cfb
insecta	Coleoptera	Coccinellidae	Coccinella	hieroglyphica	NA	83	0	1	wolb	UK	Balmoral_Scotland	57.6667	-3.25884	NA	NA	Weinert07	8.4	411.3	18.2	-0.3	Cfc
insecta	Coleoptera	Coccinellidae	Coccinella	miranda	NA	146	0	1	wolb	Spain	Tenerife	28.2898	-16.8035	NA	NA	Weinert07	15.9	301.1	25.2	9.1	Csb
insecta	Coleoptera	Coccinellidae	Coccinella	repanda	NA	2	0	1	wolb	Thailand	approx	14.0167	99.0533	1997-2000	Jun-Oct	Kittayapong03	26.2	158.7	35.1	16.8	Aw
insecta	Coleoptera	Coccinellidae	Coccinella	septempunctata	NA	4	0	1	wolb	Iran	Khuzestan	31.5505	47.8863	2007	Apr-Aug	Pourali09	24.4	856.1	44.3	6.1	BWh
insecta	Coleoptera	Coccinellidae	Coccinella	septempunctata	NA	72	2	1	wolb	UK	Dunwich_Suffolk	52.27	1.62293	NA	NA	Weinert07	9.8	461.8	20.1	0.8	Cfb
insecta	Coleoptera	Coccinellidae	Coccinella	septempunctata	NA	43	1	1	wolb	UK	Edinburgh	55.9167	-3.27555	NA	NA	Weinert07	8.6	421.3	19.1	0	Cfb
insecta	Coleoptera	Coccinellidae	Coccinella	transversalis	NA	7	0	1	wolb	Thailand	Sai_Yok	14.0167	98.6836	1999-2001	NA	Sintupachee06	22.5	123.3	30.8	13.8	Am
insecta	Coleoptera	Coccinellidae	Coccinella	trifasciata	NA	6	2	1	wolb	Iran	Khuzestan	31.5505	47.8863	2007	Apr-Aug	Pourali09	24.4	856.1	44.3	6.1	BWh
insecta	Coleoptera	Coccinellidae	Coelophora	bisellata	NA	5	0	1	wolb	Thailand	Sai_Yok	14.0167	98.6836	1999-2001	NA	Sintupachee06	22.5	123.3	30.8	13.8	Am
insecta	Coleoptera	Coccinellidae	Coleomegilla	maculata	NA	1	0	1	wolb	US_IN	WoodnrBloomington	39.1667	-86.4833	1994-1998	Aug-Nov	Werren00	11.5	904.9	29.9	-7.1	Cfa
insecta	Coleoptera	Coccinellidae	Cryptolaemus	montrouzieri	NA	1	0	1	card	NA	NA	NA	NA	NA	NA	ZchoriFein04	NA	NA	NA	NA	NA
insecta	Coleoptera	Coccinellidae	Cryptolaemus	montrouzieri	NA	1	0	1	wolb	NA	NA	NA	NA	NA	NA	ZchoriFein04	NA	NA	NA	NA	NA
insecta	Coleoptera	Coccinellidae	Cycloneda	munda	NA	1	0	1	wolb	US_IN	WoodnrBloomington	39.1667	-86.4833	1994-1998	Aug-Nov	Werren00	11.5	904.9	29.9	-7.1	Cfa
insecta	Coleoptera	Coccinellidae	Cycloneda	sanguinea	NA	1	0	1	card	US_CA	Riverside	33.953	-117.47	NA	NA	Weeks03	18	464	33.8	4.8	BSk
insecta	Coleoptera	Coccinellidae	Cycloneda	sanguinea	NA	1	0	1	wolb	US_CA	Riverside	33.953	-117.47	NA	NA	Weeks03	18	464	33.8	4.8	BSk
insecta	Coleoptera	Coccinellidae	Delphastus	pusillus	NA	9	9	1	wolb	US	centroid	36.2535	-113.676	NA	NA	Nirgianaki03	11.6	748.9	31.5	-4.2	BSk
insecta	Coleoptera	Coccinellidae	Epilachna	borealis	NA	1	0	1	wolb	Panama	BarroColoradoIsland_Gamboa_PanamaCity_CerroCampana	9	-79.7	1993-1994	Aug-Nov	Werren95	26.5	57	31.9	22	Am
insecta	Coleoptera	Coccinellidae	Epilachna	indica	NA	1	0	1	wolb	Thailand	Sai_Yok	14.0167	98.6836	1999-2001	NA	Sintupachee06	22.5	123.3	30.8	13.8	Am
insecta	Coleoptera	Coccinellidae	Epilachna	vigintioctopunctata	NA	11	0	1	wolb	Thailand	Sai_Yok	14.0167	98.6836	1999-2001	NA	Sintupachee06	22.5	123.3	30.8	13.8	Am
insecta	Coleoptera	Coccinellidae	Exochomus	quadripustulatus	NA	95	0	1	wolb	UK	Dunwich_Suffolk	52.27	1.62293	NA	NA	Weinert07	9.8	461.8	20.1	0.8	Cfb
insecta	Coleoptera	Coccinellidae	Halyzia	sedecimguttata	NA	260	3	1	wolb	Germany	Poen	54.1667	10.3772	NA	NA	Weinert07	8	602.8	20.7	-2.6	Cfb
insecta	Coleoptera	Coccinellidae	Halyzia	sedecimguttata	NA	24	0	1	wolb	UK	KingsWood_Somerset	51.0935	-3.35059	NA	NA	Weinert07	8.5	456.2	19.3	0.2	Cfb
insecta	Coleoptera	Coccinellidae	Harmonia	axyridis	NA	22	0	1	wolb	China_Hubei	Huazhong_Agricultural_University_Wuhan_Hubei_Province	30.4719	114.351	2007-2008	Nov-Oct	Yun11	17.2	890.3	33.6	0.5	Cfa
insecta	Coleoptera	Coccinellidae	Harmonia	octomaculata	NA	5	0	1	wolb	Thailand	approx	14.0167	99.0533	1997-2000	Jun-Oct	Kittayapong03	26.2	158.7	35.1	16.8	Aw
insecta	Coleoptera	Coccinellidae	Harmonia	quadripunctata	NA	33	0	1	wolb	UK	Thetford_Norfolk	52.42	0.687961	NA	NA	Weinert07	9.3	484.7	20.6	-0.5	Cfb
insecta	Coleoptera	Coccinellidae	Hippodemia	convergens	NA	1	0	1	card	US_CA	Riverside	33.953	-117.47	NA	NA	Weeks03	18	464	33.8	4.8	BSk
insecta	Coleoptera	Coccinellidae	Hippodemia	convergens	NA	1	0	1	wolb	US_CA	Riverside	33.953	-117.47	NA	NA	Weeks03	18	464	33.8	4.8	BSk
insecta	Coleoptera	Coccinellidae	Micraspis	discolor	NA	131	0	1	wolb	Thailand	approx	14.0167	99.0533	1997-2000	Jun-Oct	Kittayapong03	26.2	158.7	35.1	16.8	Aw
insecta	Coleoptera	Coccinellidae	Micraspis	discolor	NA	1	0	1	wolb	Thailand	Sai_Yok	14.0167	98.6836	1999-2001	NA	Sintupachee06	22.5	123.3	30.8	13.8	Am
insecta	Coleoptera	Coccinellidae	Micraspis	vincta	NA	5	0	1	wolb	Thailand	approx	14.0167	99.0533	1997-2000	Jun-Oct	Kittayapong03	26.2	158.7	35.1	16.8	Aw
insecta	Coleoptera	Coccinellidae	Myrrha	octodecimguttata	NA	67	0	1	wolb	Spain	Murcia	37.9833	-1.14473	NA	NA	Weinert07	18	564.5	33.2	4.7	BSk
insecta	Coleoptera	Coccinellidae	Myrrha	octodecimguttata	NA	30	0	1	wolb	UK	Edinburgh	55.9167	-3.27555	NA	NA	Weinert07	8.6	421.3	19.1	0	Cfb
insecta	Coleoptera	Coccinellidae	Myzia	oblongoguttata	NA	85	0	1	wolb	UK	Edinburgh	55.9167	-3.27555	NA	NA	Weinert07	8.6	421.3	19.1	0	Cfb
insecta	Coleoptera	Coccinellidae	Propylaea	japonica	NA	1	0	1	wolb	Thailand	approx	14.0167	99.0533	1997-2000	Jun-Oct	Kittayapong03	26.2	158.7	35.1	16.8	Aw
insecta	Coleoptera	Coccinellidae	Propylaea	japonica	NA	44	1	1	wolb	China_Hubei	Huazhong_Agricultural_University_Wuhan_Hubei_Province	30.4719	114.351	2007-2008	Nov-Oct	Yun11	17.2	890.3	33.6	0.5	Cfa
insecta	Coleoptera	Coccinellidae	Propylaea	quatuordecimpunctata	NA	23	0	1	card	UK	London	51.5	-0.242041	2006	NA	Duron08	10.7	477.9	22.8	1.5	Cfb
insecta	Coleoptera	Coccinellidae	Propylaea	quatuordecimpunctata	NA	23	0	1	wolb	UK	London	51.5	-0.242041	2006	NA	Duron08	10.7	477.9	22.8	1.5	Cfb
insecta	Coleoptera	Coccinellidae	Propylaea	quatuordecimpunctata	NA	21	0	1	wolb	UK	Thetford_Norfolk	52.42	0.687961	NA	NA	Weinert07	9.3	484.7	20.6	-0.5	Cfb
insecta	Coleoptera	Coccinellidae	Propylaea	quatuordecimpunctata	NA	11	0	1	wolb	UK	Essex	51.5685	0.357558	NA	NA	Weinert07	10.2	486.4	22	0.8	Cfb
insecta	Coleoptera	Coccinellidae	Propylaea	quatuordecimpunctata	NA	10	0	1	wolb	UK	Bristol	51.4833	-2.66092	NA	NA	Weinert07	9.7	461	20.9	1.1	Cfb
insecta	Coleoptera	Coccinellidae	Propylaea	quatuordecimpunctata	NA	10	0	1	wolb	UK	Cambridge	51.88	0.114106	NA	NA	Weinert07	9.7	501.3	21.7	-0.1	Cfb
insecta	Coleoptera	Coccinellidae	Psyllobora	duodevigintipunctata	NA	12	0	1	card	UK	London	51.5	-0.242041	2006	NA	Duron08	10.7	477.9	22.8	1.5	Cfb
insecta	Coleoptera	Coccinellidae	Psyllobora	duodevigintipunctata	NA	12	0	1	wolb	UK	London	51.5	-0.242041	2006	NA	Duron08	10.7	477.9	22.8	1.5	Cfb
insecta	Coleoptera	Coccinellidae	Rhyzobius	litura	NA	70	43	1	wolb	Germany	Poen	54.1667	10.3772	NA	NA	Weinert07	8	602.8	20.7	-2.6	Cfb
insecta	Coleoptera	Coccinellidae	Rhyzobius	litura	NA	6	0	1	wolb	UK	Thetford_Norfolk	52.42	0.687961	NA	NA	Weinert07	9.3	484.7	20.6	-0.5	Cfb
insecta	Coleoptera	Coccinellidae	Scymnus	frontalis	NA	11	0	1	wolb	Germany	Poen	54.1667	10.3772	NA	NA	Weinert07	8	602.8	20.7	-2.6	Cfb
insecta	Coleoptera	Coccinellidae	Scymnus	frontalis	NA	24	0	1	wolb	UK	Thetford_Norfolk	52.42	0.687961	NA	NA	Weinert07	9.3	484.7	20.6	-0.5	Cfb
insecta	Coleoptera	Coccinellidae	Scymnus	sp.	NA	1	0	1	card	NA	NA	NA	NA	NA	NA	ZchoriFein04	NA	NA	NA	NA	NA
insecta	Coleoptera	Coccinellidae	Scymnus	sp.	NA	1	0	1	wolb	NA	NA	NA	NA	NA	NA	ZchoriFein04	NA	NA	NA	NA	NA
insecta	Coleoptera	Coccinellidae	Subcoccinella	vigintiquatuorpunctata	NA	86	0	1	wolb	UK	Havering_London	51.8667	0.165867	NA	NA	Weinert07	9.8	501.3	21.8	0	Cfb
insecta	Coleoptera	Coccinellidae	Subcoccinella	vigintiquatuorpunctata	NA	67	0	1	wolb	UK	Thetford_Norfolk	52.42	0.687961	NA	NA	Weinert07	9.3	484.7	20.6	-0.5	Cfb
insecta	Coleoptera	Coccinellidae	Tytthaspis	hexadecpunctata	NA	19	0	1	card	UK	London	51.5	-0.242041	2006	NA	Duron08	10.7	477.9	22.8	1.5	Cfb
insecta	Coleoptera	Coccinellidae	Tytthaspis	hexadecpunctata	NA	19	0	1	wolb	UK	London	51.5	-0.242041	2006	NA	Duron08	10.7	477.9	22.8	1.5	Cfb
insecta	Coleoptera	Coccinellidae	Tytthaspis	hexadecpunctata	NA	53	0	1	wolb	UK	Thetford_Norfolk	52.42	0.687961	NA	NA	Weinert07	9.3	484.7	20.6	-0.5	Cfb
insecta	Coleoptera	Coccinellidae	Unid.	sp.	NA	1	1	1	wolb	US_IN	WoodnrBloomington	39.1667	-86.4833	1994-1998	Aug-Nov	Werren00	11.5	904.9	29.9	-7.1	Cfa
insecta	Coleoptera	Coccinellidae	Unid.	sp.	NA	1	0	1	wolb	Panama	BarroColoradoIsland_Gamboa_PanamaCity_CerroCampana	9	-79.7	1993-1994	Aug-Nov	Werren95	26.5	57	31.9	22	Am
insecta	Coleoptera	Cucujidae	Cryptolestes	pusillus	NA	1	0	1	wolb	Thailand	approx	14.0167	99.0533	NA	NA	Kageyama10	26.2	158.7	35.1	16.8	Aw
insecta	Coleoptera	Curculionidae	Anthonomous	grandis	NA	1	0	1	wolb	US	centroid	36.2535	-113.676	NA	NA	Nirgianaki03	11.6	748.9	31.5	-4.2	BSk
insecta	Coleoptera	Curculionidae	Aramigus	conirostris	Parthenogenesis	1	1	1	wolb	Uruguay	Libertad	-34.6167	-56.6208	2004-2007	NA	Rodriguero10	16.7	446.9	29.8	6.3	Cfa
insecta	Coleoptera	Curculionidae	Aramigus	tessellatus	Parthenogenesis	2	2	1	wolb	Argentina	R_Otamendi	-34.2333	-58.8987	2004-2007	NA	Rodriguero10	16.3	470.1	30.6	4.6	Cfa
insecta	Coleoptera	Curculionidae	Aramigus	tessellatus	Parthenogenesis	2	2	1	wolb	Argentina	RN_Punta_Lara	-34.8167	-58.0101	2004-2007	NA	Rodriguero10	16.7	450.7	28.8	6.6	Cfa
insecta	Coleoptera	Curculionidae	Astycus	sp.	NA	1	0	1	wolb	Thailand	Sai_Yok	14.0167	98.6836	1999-2001	NA	Sintupachee06	22.5	123.3	30.8	13.8	Am
insecta	Coleoptera	Curculionidae	Atrichonotus	sordidus	Parthenogenesis	1	0	1	wolb	Brazil	Santa_Maria	-29.6667	-53.7747	2004-2007	NA	Rodriguero10	19.3	348.3	30.3	9.4	Cfa
insecta	Coleoptera	Curculionidae	Atrichonotus	taeniatulus	Parthenogenesis	1	1	1	wolb	Argentina	Za_rate	-34.1	-59.0593	2004-2007	NA	Rodriguero10	16.5	470.6	30.9	4.7	Cfa
insecta	Coleoptera	Curculionidae	Blosyrus	herthus	NA	1	0	1	wolb	Thailand	Sai_Yok	14.0167	98.6836	1999-2001	NA	Sintupachee06	22.5	123.3	30.8	13.8	Am
insecta	Coleoptera	Curculionidae	Calomyterus	sp.	NA	2	0	1	wolb	Thailand	Sai_Yok	14.0167	98.6836	1999-2001	NA	Sintupachee06	22.5	123.3	30.8	13.8	Am
insecta	Coleoptera	Curculionidae	Ceutorhynchus	obstrictus	NA	7	7	1	wolb	Canada_AB	Lethbridge	49.6833	-112.986	NA	NA	Floate11	5.4	914.6	26	-14.9	BSk
insecta	Coleoptera	Curculionidae	Ceutorhynchus	obstrictus	NA	5	5	1	wolb	Canada_BC	Creston	49.0833	-116.586	NA	NA	Floate11	6.5	785.8	26.6	-8.3	Dfb
insecta	Coleoptera	Curculionidae	Ceutorhynchus	obstrictus	NA	8	8	1	wolb	Canada_ON	Herward	43.8167	-80.3248	NA	NA	Floate11	5.7	953.1	24.9	-11.8	Dfb
insecta	Coleoptera	Curculionidae	Ceutorhynchus	obstrictus	NA	5	5	1	wolb	Canada_ON	Elora	43.6833	-80.4295	NA	NA	Floate11	6	949.9	25.2	-11.5	Dfb
insecta	Coleoptera	Curculionidae	Ceutorhynchus	obstrictus	NA	5	5	1	wolb	Canada_QC	Quatre_Chemins	46.6	-70.5112	NA	NA	Floate11	2	1052.6	21.8	-18.2	Dfb
insecta	Coleoptera	Curculionidae	Ceutorhynchus	obstrictus	NA	5	5	1	wolb	Canada_SK	Swift_Current	50.25	-107.81	NA	NA	Floate11	3.6	1105.7	25.9	-18.3	BSk
insecta	Coleoptera	Curculionidae	Ceutorhynchus	obstrictus	NA	7	7	1	wolb	Germany	Goettingen	51.5333	9.89175	NA	NA	Floate11	8.5	615.3	21.9	-3	Cfb
insecta	Coleoptera	Curculionidae	Ceutorhynchus	obstrictus	NA	6	6	1	wolb	Russia	Novoaleksandrovsk	45.4833	41.2	NA	NA	Floate11	10.7	922.4	29.8	-6.1	Cfa
insecta	Coleoptera	Curculionidae	Ceutorhynchus	obstrictus	NA	5	5	1	wolb	Switzerland	Alle_Canton_Jura	47.4333	7.05889	NA	NA	Floate11	8.9	633.3	23.3	-2.4	Cfb
insecta	Coleoptera	Curculionidae	Ceutorhynchus	obstrictus	NA	5	5	1	wolb	UK	Rothamsted	51.8167	-0.358492	NA	NA	Floate11	9.7	500.7	21.9	0	Cfb
insecta	Coleoptera	Curculionidae	Ceutorhynchus	obstrictus	NA	5	5	1	wolb	US_WA	Pomeroy	46.4333	-117.614	NA	NA	Floate11	8.6	701.4	28.7	-5	Dsb
insecta	Coleoptera	Curculionidae	Conotrachelus	nenuphar	Peach	12	12	1	wolb	US_FL	Quincy	30.5763	-84.5978	NA	NA	Zhang10	19.3	603.5	32.7	3.8	Cfa
insecta	Coleoptera	Curculionidae	Conotrachelus	nenuphar	Peach_and_plum	8	8	1	wolb	US_GA	Byron	32.6511	-83.7714	NA	NA	Zhang10	17.8	683.8	33	1.5	Cfa
insecta	Coleoptera	Curculionidae	Conotrachelus	nenuphar	Apple	8	8	1	wolb	US_MA	Amherst	42.3679	-72.5406	NA	NA	Zhang10	8.5	925.1	28	-11	Dfa
insecta	Coleoptera	Curculionidae	Conotrachelus	nenuphar	Nectarine	11	10	1	wolb	US_NJ	Bridgeton	39.4281	-75.246	NA	NA	Zhang10	12.4	848.6	30.1	-4.6	Cfa
insecta	Coleoptera	Curculionidae	Conotrachelus	nenuphar	Blueberry	6	5	1	wolb	US_NJ	Chatsworth	39.8173	-74.5437	NA	NA	Zhang10	11.7	838.8	29.5	-5.3	Cfa
insecta	Coleoptera	Curculionidae	Conotrachelus	nenuphar	Apple	10	10	1	wolb	US_NY	Geneva	42.8663	-77.0048	NA	NA	Zhang10	8.4	913.2	27.1	-9.1	Dfb
insecta	Coleoptera	Curculionidae	Conotrachelus	nenuphar	Peach	1	0	1	wolb	US_SC	Clemson	34.6801	-82.834	NA	NA	Zhang10	15.8	727	32	-0.7	Cfa
insecta	Coleoptera	Curculionidae	Conotrachelus	nenuphar	Apple_and_plum	6	6	1	wolb	US_VA	Blacksburg	37.2301	-80.4646	NA	NA	Zhang10	11.2	768.6	28.5	-5.8	Cfa
insecta	Coleoptera	Curculionidae	Conotrachelus	nenuphar	Apple	6	6	1	wolb	US_VA	Troutville	37.4154	-79.889	NA	NA	Zhang10	12.8	787.6	30.3	-4.1	Cfa
insecta	Coleoptera	Curculionidae	Conotrachelus	nenuphar	Apple	6	6	1	wolb	US_VA	Washington	38.7128	-78.1641	NA	NA	Zhang10	11.7	829.4	29.8	-6.7	Cfb
insecta	Coleoptera	Curculionidae	Conotrachelus	nenuphar	Apple	6	6	1	wolb	US_VA	Whitethorne	37.1997	-80.5733	NA	NA	Zhang10	11.6	771.4	29	-5.6	Cfa
insecta	Coleoptera	Curculionidae	Conotrachelus	nenuphar	Peach_and_plum	14	14	1	wolb	US_WV	Kearneysville	39.388	-77.8943	NA	NA	Zhang10	11.5	860.2	30	-6.4	Cfa
insecta	Coleoptera	Curculionidae	Cossonus	sp.	NA	1	1	1	wolb	Panama	BarroColoradoIsland_Gamboa_PanamaCity_CerroCampana	9	-79.7	1993-1994	Aug-Nov	Werren95	26.5	57	31.9	22	Am
insecta	Coleoptera	Curculionidae	Curculio	sikkimensis	Quercus_crispula	39	29	1	wolb	Japan	Hacchoudaira_Kyoto	35.23	135.83	2005-2008	NA	Toju11	10.9	835.9	27.2	-3.8	Cfa
insecta	Coleoptera	Curculionidae	Curculio	sikkimensis	Quercus_serrata	35	31	1	wolb	Japan	Shobara_Hiroshima	34.86	133.21	2005-2008	NA	Toju11	11.9	843.8	28.7	-3.5	Cfa
insecta	Coleoptera	Curculionidae	Curculio	sikkimensis	Quercus_serrata	35	32	1	wolb	Japan	Tsukubasan_Ibaraki	36.24	140.096	2005-2008	NA	Toju11	11.9	789.8	27.9	-5	Cfa
insecta	Coleoptera	Curculionidae	Curculio	sikkimensis	Quercus_crispula	28	25	1	wolb	Japan	Nasu_Tochigi	37.12	140	2005-2008	NA	Toju11	8.8	843.9	25.6	-7.4	Dfa
insecta	Coleoptera	Curculionidae	Curculio	sikkimensis	Quercus_crispula	26	20	1	wolb	Japan	Gandou-Ko_Iwate	39.8	141.364	2005-2008	NA	Toju11	6.7	883	24.2	-9.4	Dfa
insecta	Coleoptera	Curculionidae	Curculio	sikkimensis	Quercus_crispula	26	24	1	wolb	Japan	Hayasaka-Touge_Iwate	39.85	141.51	2005-2008	NA	Toju11	6	864.9	23.2	-9.9	Dfb
insecta	Coleoptera	Curculionidae	Curculio	sikkimensis	Castanea_crenata	26	23	1	wolb	Japan	Sanjiro_Nagano	36.21	138.1	2005-2008	NA	Toju11	4.4	870.6	21.6	-12.4	Cfa
insecta	Coleoptera	Curculionidae	Curculio	sikkimensis	Castanea_crenata	26	8	1	wolb	Japan	Wakinosawa_Aomori	41.15	140.8	2005-2008	NA	Toju11	9.7	831.5	26.5	-5.3	Cfa
insecta	Coleoptera	Curculionidae	Curculio	sikkimensis	Quercus_crispula	26	26	1	wolb	Japan	Yamizo_Ibaraki	36.91	140.27	2005-2008	NA	Toju11	10.5	802.6	26.7	-5.7	Cfa
insecta	Coleoptera	Curculionidae	Curculio	sikkimensis	Castanea_crenata	24	17	1	wolb	Japan	Nihonmatsu_Fukushima	37.61	140.343	2005-2008	NA	Toju11	9.9	867.4	27.5	-5.9	Dfb
insecta	Coleoptera	Curculionidae	Curculio	sikkimensis	Quercus_crispula	24	22	1	wolb	Japan	Sugadaira_Nagano	36.55	138.34	2005-2008	NA	Toju11	6.4	875.8	23.9	-10.8	Cfa
insecta	Coleoptera	Curculionidae	Curculio	sikkimensis	Quercus_crispula	22	19	1	wolb	Japan	Ohyorogisan_Shimane	35.09	132.84	2005-2008	NA	Toju11	10	829.7	26.2	-4.8	Cfa
insecta	Coleoptera	Curculionidae	Curculio	sikkimensis	Quercus_serrata	21	17	1	wolb	Japan	Aobadai_Niigata	37.45	138.75	2005-2008	NA	Toju11	12.4	885.1	29.8	-3.2	Cfa
insecta	Coleoptera	Curculionidae	Curculio	sikkimensis	Quercus_crispula	21	10	1	wolb	Japan	Nigorikawa_Hokkaido	42.15	140.48	2005-2008	NA	Toju11	7.9	873.8	24.5	-7.3	Dfb
insecta	Coleoptera	Curculionidae	Curculio	sikkimensis	Quercus_crispula	20	16	1	wolb	Japan	Happoudai_Niigata	37.43	138.94	2005-2008	NA	Toju11	11.1	888	28.6	-4.6	Cfa
insecta	Coleoptera	Curculionidae	Curculio	sikkimensis	Quercus_crispula	20	20	1	wolb	Japan	Ikaho_Gunma	36.49	138.911	2005-2008	NA	Toju11	8.1	861	25.3	-9.3	Cwa
insecta	Coleoptera	Curculionidae	Curculio	sikkimensis	Quercus_serrata	20	19	1	wolb	Japan	Nandaisan_Ibaraki	36.3	140.23	2005-2008	NA	Toju11	12.7	786.9	28.7	-4.4	Cfa
insecta	Coleoptera	Curculionidae	Curculio	sikkimensis	Castanea_crenata	20	13	1	wolb	Japan	Shinano-Ohmachi_Nagano	36.58	137.84	2005-2008	NA	Toju11	9.2	893.3	27.4	-7.9	Dfc
insecta	Coleoptera	Curculionidae	Curculio	sikkimensis	Castanea_crenata	20	13	1	wolb	Japan	Toroko_Akita	40.02	140.82	2005-2008	NA	Toju11	7.4	924.6	25.5	-8.8	Dfa
insecta	Coleoptera	Curculionidae	Curculio	sikkimensis	Castanea_crenata	19	17	1	wolb	Japan	Hacchoudaira_Kyoto	35.23	135.83	2005-2008	NA	Toju11	10.9	835.9	27.2	-3.8	Cfa
insecta	Coleoptera	Curculionidae	Curculio	sikkimensis	Quercus_serrata	19	16	1	wolb	Japan	Misumi_Shimane	34.81	131.962	2005-2008	NA	Toju11	14.4	740.1	29.6	1.1	Cfa
insecta	Coleoptera	Curculionidae	Curculio	sikkimensis	Quercus_crispula	19	17	1	wolb	Japan	Miyamoto-Sho_Niigata	37.45	138.75	2005-2008	NA	Toju11	12.4	885.1	29.8	-3.2	Cfa
insecta	Coleoptera	Curculionidae	Curculio	sikkimensis	Castanea_crenata	18	17	1	wolb	Japan	Ikaho_Gunma	36.49	138.911	2005-2008	NA	Toju11	8.1	861	25.3	-9.3	Cwa
insecta	Coleoptera	Curculionidae	Curculio	sikkimensis	Quercus_acuta	18	16	1	wolb	Japan	Nandaisan_Ibaraki	36.3	140.23	2005-2008	NA	Toju11	12.7	786.9	28.7	-4.4	Cfa
insecta	Coleoptera	Curculionidae	Curculio	sikkimensis	Quercus_glauca	17	14	1	wolb	Japan	Uryuyama_Kyoto	35.03	135.8	2005-2008	NA	Toju11	14	823.2	30.9	-1.1	Cfa
insecta	Coleoptera	Curculionidae	Curculio	sikkimensis	Quercus_serrata	17	14	1	wolb	Japan	Yamizo_Ibaraki	36.91	140.27	2005-2008	NA	Toju11	10.5	802.6	26.7	-5.7	Cfa
insecta	Coleoptera	Curculionidae	Curculio	sikkimensis	Quercus_serrata	16	14	1	wolb	Japan	Yoshidayama_Kyoto	35.03	135.79	2005-2008	NA	Toju11	15.3	818.8	32.3	0.2	Cfa
insecta	Coleoptera	Curculionidae	Curculio	sikkimensis	Castanea_crenata	15	14	1	wolb	Japan	Arafuneyama_Nagano	36.21	138.61	2005-2008	NA	Toju11	8.1	863.7	25.6	-9.8	Cwa
insecta	Coleoptera	Curculionidae	Curculio	sikkimensis	Quercus_crispula	15	8	1	wolb	Japan	Toroko_Akita	40.02	140.82	2005-2008	NA	Toju11	7.4	924.6	25.5	-8.8	Dfa
insecta	Coleoptera	Curculionidae	Curculio	sikkimensis	Castanea_crenata	14	6	1	wolb	Japan	Nigorikawa_Hokkaido	42.15	140.48	2005-2008	NA	Toju11	7.9	873.8	24.5	-7.3	Dfb
insecta	Coleoptera	Curculionidae	Curculio	sikkimensis	Quercus_aliena	14	13	1	wolb	Japan	Shobara_Hiroshima	34.86	133.21	2005-2008	NA	Toju11	11.9	843.8	28.7	-3.5	Cfa
insecta	Coleoptera	Curculionidae	Curculio	sikkimensis	Quercus_dentata	13	4	1	wolb	Japan	Kaizaki_Aomori	41.15	140.77	2005-2008	NA	Toju11	9.4	836.3	26.3	-5.6	Cfa
insecta	Coleoptera	Curculionidae	Curculio	sikkimensis	Quercus_serrata	13	13	1	wolb	Japan	Kuji_Ibaraki	36.8	140.39	2005-2008	NA	Toju11	12	775.9	27.8	-4.1	Cfa
insecta	Coleoptera	Curculionidae	Curculio	sikkimensis	Quercus_crispula	12	5	1	wolb	Japan	Wakinosawa_Aomori	41.15	140.8	2005-2008	NA	Toju11	9.7	831.5	26.5	-5.3	Cfa
insecta	Coleoptera	Curculionidae	Curculio	sikkimensis	Quercus_crispula	11	11	1	wolb	Japan	Kirifuri-CC_Tochigi	36.78	139.618	2005-2008	NA	Toju11	9.2	810.7	25.3	-6.8	Cfa
insecta	Coleoptera	Curculionidae	Curculio	sikkimensis	Quercus_serrata	11	11	1	wolb	Japan	Sansohken_Ibaraki	36.07	140.13	2005-2008	NA	Toju11	13.7	791.2	30	-3.6	Cfa
insecta	Coleoptera	Curculionidae	Curculio	sikkimensis	Quercus_serrata	10	10	1	wolb	Japan	Inuyama_Aichi	35.37	136.99	2005-2008	NA	Toju11	15.2	826.2	32.1	-0.6	Cfa
insecta	Coleoptera	Curculionidae	Curculio	sikkimensis	Quercus_crispula	10	10	1	wolb	Japan	Minakami_Gunma	36.8	139.04	2005-2008	NA	Toju11	9.5	856	26.5	-7.3	Cfa
insecta	Coleoptera	Curculionidae	Curculio	sikkimensis	Quercus_crispula	9	4	1	wolb	Japan	Hangetsuko_Hokkaido	42.85	140.75	2005-2008	NA	Toju11	5.8	962.1	24.2	-11.4	Dfb
insecta	Coleoptera	Curculionidae	Curculio	sikkimensis	Quercus_crispula	9	7	1	wolb	Japan	Kurosawa_Akita	39.25	140.7	2005-2008	NA	Toju11	9.3	932.7	27.7	-6.9	Dfa
insecta	Coleoptera	Curculionidae	Curculio	sikkimensis	Quercus_aliena	9	9	1	wolb	Japan	Miyoshi_Hiroshima	34.82	132.85	2005-2008	NA	Toju11	13.6	818.9	30.2	-1.3	Cfa
insecta	Coleoptera	Curculionidae	Curculio	sikkimensis	Castanea_crenata	9	8	1	wolb	Japan	Shobara_Hiroshima	34.86	133.21	2005-2008	NA	Toju11	11.9	843.8	28.7	-3.5	Cfa
insecta	Coleoptera	Curculionidae	Curculio	sikkimensis	Castanea_crenata	9	9	1	wolb	Japan	Ueda_Nagano	36.34	138.171	2005-2008	NA	Toju11	12	890.8	30.3	-5.8	Cfa
insecta	Coleoptera	Curculionidae	Curculio	sikkimensis	Quercus_crispula	9	8	1	wolb	Japan	Yokomuki_Fukushima	37.65	140.26	2005-2008	NA	Toju11	5.3	861.8	22.3	-10.3	Dfb
insecta	Coleoptera	Curculionidae	Curculio	sikkimensis	Quercus_serrata	8	8	1	wolb	Japan	Arafuneyama_Nagano	36.21	138.61	2005-2008	NA	Toju11	8.1	863.7	25.6	-9.8	Cwa
insecta	Coleoptera	Curculionidae	Curculio	sikkimensis	Quercus_serrata	8	7	1	wolb	Japan	Kuriyama_Tochigi	36.86	139.61	2005-2008	NA	Toju11	8.2	818.6	24.4	-7.7	Cfa
insecta	Coleoptera	Curculionidae	Curculio	sikkimensis	Castanea_crenata	8	5	1	wolb	Japan	Nagawa_Nagano	36.04	137.7	2005-2008	NA	Toju11	5.1	871.1	22.1	-11.5	Dfb
insecta	Coleoptera	Curculionidae	Curculio	sikkimensis	Quercus_serrata	8	8	1	wolb	Japan	Nikkoh_Tochigi	36.72	139.65	2005-2008	NA	Toju11	10.9	810.5	27.2	-5.6	Cfa
insecta	Coleoptera	Curculionidae	Curculio	sikkimensis	Quercus_serrata	8	8	1	wolb	Japan	Ueda_Nagano	36.34	138.171	2005-2008	NA	Toju11	12	890.8	30.3	-5.8	Cfa
insecta	Coleoptera	Curculionidae	Curculio	sikkimensis	Quercus_glauca	7	6	1	wolb	Japan	Ito-Campus_Fukuoka	33.6	130.221	2005-2008	NA	Toju11	16.3	745.9	31.4	2.6	Cfa
insecta	Coleoptera	Curculionidae	Curculio	sikkimensis	Quercus_salicina	7	6	1	wolb	Japan	Shibisan_Kagoshima	31.98	130.37	2005-2008	NA	Toju11	13.4	709.9	27.1	-0.8	Cfa
insecta	Coleoptera	Curculionidae	Curculio	sikkimensis	Quercus_variabilis	7	7	1	wolb	Japan	Shobara_Hiroshima	34.86	133.21	2005-2008	NA	Toju11	11.9	843.8	28.7	-3.5	Cfa
insecta	Coleoptera	Curculionidae	Curculio	sikkimensis	Quercus_serrata	6	6	1	wolb	Japan	Kuguno_Gifu	36.06	137.24	2005-2008	NA	Toju11	9.5	891.7	27.4	-7.2	Dfa
insecta	Coleoptera	Curculionidae	Curculio	sikkimensis	Castanea_crenata	6	6	1	wolb	Japan	Kurosawa_Akita	39.25	140.7	2005-2008	NA	Toju11	9.3	932.7	27.7	-6.9	Dfa
insecta	Coleoptera	Curculionidae	Curculio	sikkimensis	Quercus_aliena	6	6	1	wolb	Japan	Misumi_Shimane	34.81	131.962	2005-2008	NA	Toju11	14.4	740.1	29.6	1.1	Cfa
insecta	Coleoptera	Curculionidae	Curculio	sikkimensis	Quercus_serrata	6	6	1	wolb	Japan	Ujiie_Tochigi	36.66	139.97	2005-2008	NA	Toju11	13.1	813	29.5	-4.2	Cfa
insecta	Coleoptera	Curculionidae	Curculio	sikkimensis	Castanea_crenata_Cultivar	6	3	1	wolb	Japan	Yatabe_Tsukuba	36.04	140.07	2005-2008	NA	Toju11	14	789.4	30.2	-3	Cfa
insecta	Coleoptera	Curculionidae	Curculio	sikkimensis	Quercus_crispula	5	5	1	wolb	Japan	Kirifuri-Kougen_Tochigi	36.78	139.62	2005-2008	NA	Toju11	9.2	810.7	25.3	-6.8	Cfa
insecta	Coleoptera	Curculionidae	Curculio	sikkimensis	Quercus_acuta	5	5	1	wolb	Japan	Shibisan_Kagoshima	31.98	130.37	2005-2008	NA	Toju11	13.4	709.9	27.1	-0.8	Cfa
insecta	Coleoptera	Curculionidae	Curculio	sikkimensis	Quercus_crispula	5	2	1	wolb	Japan	Teine_Hokkaido	43.12	141.22	2005-2008	NA	Toju11	7.1	947.2	24.9	-9.8	Dfb
insecta	Coleoptera	Curculionidae	Curculio	sikkimensis	Quercus_serrata	4	4	1	wolb	Japan	Hohkyosan_Ibaraki	36.16	135.83	2005-2008	NA	Toju11	NA	NA	NA	NA	Cfa
insecta	Coleoptera	Curculionidae	Curculio	sikkimensis	Quercus_serrata	4	4	1	wolb	Japan	Ikaho_Gunma	36.49	138.911	2005-2008	NA	Toju11	8.1	861	25.3	-9.3	Cwa
insecta	Coleoptera	Curculionidae	Curculio	sikkimensis	Castanea_crenata	4	4	1	wolb	Japan	Kuji_Ibaraki	36.8	140.39	2005-2008	NA	Toju11	12	775.9	27.8	-4.1	Cfa
insecta	Coleoptera	Curculionidae	Curculio	sikkimensis	Quercus_serrata	4	3	1	wolb	Japan	Myogisan_Gunma	36.28	138.741	2005-2008	NA	Toju11	10.9	874.7	28.6	-7.3	Cwa
insecta	Coleoptera	Curculionidae	Curculio	sikkimensis	Quercus_crispula	4	4	1	wolb	Japan	Notegami-Yama_Fukushima	37.64	140.81	2005-2008	NA	Toju11	10.3	813.5	26.7	-4.9	Cfa
insecta	Coleoptera	Curculionidae	Curculio	sikkimensis	Quercus_serrata	4	4	1	wolb	Japan	Ojika-Kougen_Tochigi	37.04	139.73	2005-2008	NA	Toju11	8.4	841.2	25.1	-7.6	Dfa
insecta	Coleoptera	Curculionidae	Curculio	sikkimensis	Quercus_myrsinifolia	4	4	1	wolb	Japan	Ryujinsan_Ibaraki	36.22	140.24	2005-2008	NA	Toju11	13.7	789.9	29.8	-3.5	Cfa
insecta	Coleoptera	Curculionidae	Curculio	sikkimensis	Quercus_myrsinifolia	4	4	1	wolb	Japan	Shiiba_Miyazaki	32.44	131.16	2005-2008	NA	Toju11	12.6	754	27	-2.8	Cfa
insecta	Coleoptera	Curculionidae	Curculio	sikkimensis	Quercus_serrata	4	4	1	wolb	Japan	Takayama_Gunma	36.61	138.89	2005-2008	NA	Toju11	11.1	857.8	28.4	-6.2	Dfb
insecta	Coleoptera	Curculionidae	Curculio	sikkimensis	Castanea_crenata	3	2	1	wolb	Japan	Natsudomari_Aomori	41	140.908	2005-2008	NA	Toju11	9.6	848.7	26.6	-5.5	Cfa
insecta	Coleoptera	Curculionidae	Curculio	sikkimensis	Quercus_myrsinifolia	3	3	1	wolb	Japan	Sansohken_Ibaraki	36.07	140.13	2005-2008	NA	Toju11	13.7	791.2	30	-3.6	Cfa
insecta	Coleoptera	Curculionidae	Curculio	sikkimensis	Quercus_crispula	3	3	1	wolb	Japan	Tachimaru-Touge_Iwate	39.43	141.66	2005-2008	NA	Toju11	6.9	842.2	23.8	-8.7	Cfa
insecta	Coleoptera	Curculionidae	Curculio	sikkimensis	Quercus_serrata	3	3	1	wolb	Japan	Tsukubadai_Ibaraki	36.11	140.09	2005-2008	NA	Toju11	13.7	793.7	30.1	-3.6	Cfa
insecta	Coleoptera	Curculionidae	Cyrtepistomus	castaneus	NA	1	1	1	wolb	US_IN	WoodnrBloomington	39.1667	-86.4833	1994-1998	Aug-Nov	Werren00	11.5	904.9	29.9	-7.1	Cfa
insecta	Coleoptera	Curculionidae	Echinocnemus	oryzae	NA	2	0	1	wolb	Thailand	approx	14.0167	99.0533	1997-2000	Jun-Oct	Kittayapong03	26.2	158.7	35.1	16.8	Aw
insecta	Coleoptera	Curculionidae	Enoploplactus	lizeri	Sexual	1	0	1	wolb	Argentina	Gral_Lavalle	-32.7167	-68.6	2004-2007	NA	Rodriguero10	17.3	589.2	33	1.6	BWk
insecta	Coleoptera	Curculionidae	Enoploplactus	sulfureovitattus	Sexual	1	0	1	wolb	Argentina	Gral_Lavalle	-32.7167	-68.6	2004-2007	NA	Rodriguero10	17.3	589.2	33	1.6	BWk
insecta	Coleoptera	Curculionidae	Eugnathus	alterans	NA	1	0	1	wolb	Thailand	Sai_Yok	14.0167	98.6836	1999-2001	NA	Sintupachee06	22.5	123.3	30.8	13.8	Am
insecta	Coleoptera	Curculionidae	Eurymetopus	fallax	Parthenogenesis	1	1	1	wolb	Argentina	Ciudad_Bs_As	-34.6	-58.4683	2004-2007	NA	Rodriguero10	16.7	457	29.4	6.3	Cfa
insecta	Coleoptera	Curculionidae	Eurymetopus	globosus	Parthenogenesis	1	1	1	wolb	Argentina	Manantiales	-29.8667	-63.8855	2004-2007	NA	Rodriguero10	17.2	454.3	30.8	3	Cwa
insecta	Coleoptera	Curculionidae	Hydronomidius	molitor	NA	1	1	1	wolb	Thailand	approx	14.0167	99.0533	1997-2000	Jun-Oct	Kittayapong03	26.2	158.7	35.1	16.8	Aw
insecta	Coleoptera	Curculionidae	Ips	cembrae	NA	4	0	1	wolb	Austria	approx	47.0334	10.7458	NA	NA	Kawasaki16	1.7	580.9	14	-9.5	Dfb
insecta	Coleoptera	Curculionidae	Ips	sexdentatus	NA	4	0	1	wolb	Austria	approx	47.0334	10.7458	NA	NA	Kawasaki16	1.7	580.9	14	-9.5	Dfb
insecta	Coleoptera	Curculionidae	Larinus	cynarae	1999	17	0	1	card	Italy	Sardaigne	40.0583	7.85793	1999	NA	Duron08	NA	NA	NA	NA	Csa
insecta	Coleoptera	Curculionidae	Larinus	cynarae	1999	17	0	1	wolb	Italy	Sardaigne	40.0583	7.85793	1999	NA	Duron08	NA	NA	NA	NA	Csa
insecta	Coleoptera	Curculionidae	Larinus	scolymi	2005	12	0	1	wolb	Spain	approx	41.3987	-3.76694	2005	NA	Duron08	10.2	617.1	26.7	-1.6	Csa
insecta	Coleoptera	Curculionidae	Larinus	scolymi	2005	12	0	1	card	Spain	approx	41.3987	-3.76694	2005	NA	Duron08	10.2	617.1	26.7	-1.6	Csa
insecta	Coleoptera	Curculionidae	Mimographus	ocellatus	Presumed_parthenogenesis	1	1	1	wolb	Argentina	Obera	-27.4833	-55.1398	2004-2007	NA	Rodriguero10	20.1	353.5	31.8	9.1	Cfa
insecta	Coleoptera	Curculionidae	Myllocerus	discolor	NA	1	1	1	wolb	India	approx	18.5109	74.5264	NA	NA	Prakash06	25.8	292.1	38.7	12.7	BSh
insecta	Coleoptera	Curculionidae	Naupactus	ambiguus	Presumed_parthenogenesis	3	3	1	wolb	Argentina	Godoy_Cruz	-36.4076	-68.8672	2004-2007	NA	Rodriguero10	10.4	552.7	27.2	-3.9	BSk
insecta	Coleoptera	Curculionidae	Naupactus	cervinus	Parthenogenesis	20	20	1	wolb	Brazil	Sao_Sepe_	-30.1667	-53.5819	2004-2007	NA	Rodriguero10	19.2	342.6	30.2	9.6	Cfa
insecta	Coleoptera	Curculionidae	Naupactus	cinereidorsum	Sexual	5	0	1	wolb	Argentina	Min_Rivadavia	-34.85	-58.3526	2004-2007	NA	Rodriguero10	16.4	463.2	29.4	5.7	Cfa
insecta	Coleoptera	Curculionidae	Naupactus	condecoratus	Presumed_parthenogenesis	1	1	1	wolb	Argentina	Puerto_Iguazu_	-25.6833	-54.5845	2004-2007	NA	Rodriguero10	21.1	350.2	32.4	8.9	Cfa
insecta	Coleoptera	Curculionidae	Naupactus	cyphoides	Parthenogenesis	1	1	1	wolb	Argentina	San_Ignacio	-27.2667	-55.5433	2004-2007	NA	Rodriguero10	21	364.8	32.9	9.8	Cfa
insecta	Coleoptera	Curculionidae	Naupactus	dissimilis	Presumed_parthenogenesis	1	1	1	wolb	Argentina	R_Yacutinga	-26.6	-54.0765	2004-2007	NA	Rodriguero10	18.3	335.2	29.6	6.8	Cfa
insecta	Coleoptera	Curculionidae	Naupactus	dissimulator	Sexual	5	0	1	wolb	Argentina	Ciudad_Bs_As	-34.6	-58.4683	2004-2007	NA	Rodriguero10	16.7	457	29.4	6.3	Cfa
insecta	Coleoptera	Curculionidae	Naupactus	leucoloma	Parthenogenesis	3	3	1	wolb	Argentina	Godoy_Cruz	-32.9333	-68.8672	2004-2007	NA	Rodriguero10	15.8	553.2	31.5	0.9	BWk
insecta	Coleoptera	Curculionidae	Naupactus	minor	Parthenogenesis	3	3	1	wolb	Argentina	Arrecifes	-34.0667	-60.1097	2004-2007	NA	Rodriguero10	16.6	473.4	31.3	4.7	Cfa
insecta	Coleoptera	Curculionidae	Naupactus	peregrinus	Parthenogenesis	1	1	1	wolb	Argentina	Concordia	-31.3833	-58.0591	2004-2007	NA	Rodriguero10	18.6	458.4	32.6	7	Cfa
insecta	Coleoptera	Curculionidae	Naupactus	purpureoviolaceus	Presumed_parthenogenesis	1	1	1	wolb	Argentina	Concordia	-31.3833	-58.0591	2004-2007	NA	Rodriguero10	18.6	458.4	32.6	7	Cfa
insecta	Coleoptera	Curculionidae	Naupactus	tremolerasi	Presumed_parthenogenesis	1	1	1	wolb	Brazil	Santa_Maria	-29.6667	-53.7747	2004-2007	NA	Rodriguero10	19.3	348.3	30.3	9.4	Cfa
insecta	Coleoptera	Curculionidae	Naupactus	tucumanensis	Sexual	1	0	1	wolb	Argentina	Tucuman	-26.85	-65.2926	2004-2007	NA	Rodriguero10	19.5	447.9	31.4	5.7	Cwa
insecta	Coleoptera	Curculionidae	Naupactus	verecundus	Presumed_parthenogenesis	1	1	1	wolb	Argentina	Macachin	-37.1333	-63.6713	2004-2007	NA	Rodriguero10	15.1	579.4	32.4	0.7	Cfa
insecta	Coleoptera	Curculionidae	Naupactus	versatilis	Sexual	1	0	1	wolb	Argentina	San_Ignacio	-27.2667	-55.5433	2004-2007	NA	Rodriguero10	21	364.8	32.9	9.8	Cfa
insecta	Coleoptera	Curculionidae	Naupactus	xanthographus	Sexual	3	0	1	wolb	Argentina	R_Otamendi	-34.2333	-58.8987	2004-2007	NA	Rodriguero10	16.3	470.1	30.6	4.6	Cfa
insecta	Coleoptera	Curculionidae	Oryzophilus	surinamensis	NA	1	0	1	card	NA	NA	NA	NA	NA	NA	ZchoriFein04	NA	NA	NA	NA	NA
insecta	Coleoptera	Curculionidae	Oryzophilus	surinamensis	NA	1	1	1	wolb	NA	NA	NA	NA	NA	NA	ZchoriFein04	NA	NA	NA	NA	NA
insecta	Coleoptera	Curculionidae	Pachyschelus	sp.	NA	1	0	1	wolb	Panama	BarroColoradoIsland_Gamboa_PanamaCity_CerroCampana	9	-79.7	1993-1994	Aug-Nov	Werren95	26.5	57	31.9	22	Am
insecta	Coleoptera	Curculionidae	Pantomorus	auripes	Presumed_parthenogenesis	3	3	1	wolb	Argentina	Min_Rivadavia	-34.85	-58.3526	2004-2007	NA	Rodriguero10	16.4	463.2	29.4	5.7	Cfa
insecta	Coleoptera	Curculionidae	Pantomorus	cinerosus	Presumed_parthenogenesis	2	2	1	wolb	Argentina	Pque_Mburucuya_	-27.9667	-58.0396	2004-2007	NA	Rodriguero10	21.6	404.8	34	10.4	Cfa
insecta	Coleoptera	Curculionidae	Pantomorus	viridisquamosus	Presumed_parthenogenesis	2	2	1	wolb	Argentina	Pergamino	-33.9	-60.5829	2004-2007	NA	Rodriguero10	16.4	472.5	30.8	4.3	Cfa
insecta	Coleoptera	Curculionidae	Peridinetus	subirroratus	NA	1	0	1	wolb	Panama	BarroColoradoIsland_Gamboa_PanamaCity_CerroCampana	9	-79.7	1993-1994	Aug-Nov	Werren95	26.5	57	31.9	22	Am
insecta	Coleoptera	Curculionidae	Phelypera	distigma	NA	1	0	1	wolb	Panama	BarroColoradoIsland_Gamboa_PanamaCity_CerroCampana	9	-79.7	1993-1994	Aug-Nov	Werren95	26.5	57	31.9	22	Am
insecta	Coleoptera	Curculionidae	Phrixopogon	hausti	NA	1	0	1	wolb	Thailand	Sai_Yok	14.0167	98.6836	1999-2001	NA	Sintupachee06	22.5	123.3	30.8	13.8	Am
insecta	Coleoptera	Curculionidae	Phyllobius	argentatus	NA	17	0	1	card	France	MontBarri	43.6	3.20994	2004	NA	Duron08	12.8	575.8	27.5	0.9	Csb
insecta	Coleoptera	Curculionidae	Phyllobius	argentatus	NA	17	0	1	wolb	France	MontBarri	43.6	3.20994	2004	NA	Duron08	12.8	575.8	27.5	0.9	Csb
insecta	Coleoptera	Curculionidae	Pityogenes	bidentatus	NA	2	0	1	wolb	Austria	approx	47.0334	10.7458	NA	NA	Kawasaki16	1.7	580.9	14	-9.5	Dfb
insecta	Coleoptera	Curculionidae	Pityogenes	chalcographus	NA	15	3	1	wolb	Austria	Weissensee	46.7076	13.3001	2003-2005	NA	Wolfgang09	5.5	672.3	20.6	-8.4	Dfb
insecta	Coleoptera	Curculionidae	Pityogenes	chalcographus	NA	8	2	1	wolb	Croatia	Jastrebarsko	45.6718	15.6472	2003-2005	NA	Wolfgang09	11	726.8	27	-2.9	Cfb
insecta	Coleoptera	Curculionidae	Pityogenes	chalcographus	NA	15	6	1	wolb	Czech_Republic	Uhlirske_Janovice	49.8781	15.0207	2003-2005	NA	Wolfgang09	7.8	693	22.8	-5	Cfb
insecta	Coleoptera	Curculionidae	Pityogenes	chalcographus	NA	7	4	1	wolb	Estonia	Varbola_Estonia	59.0435	24.4511	2003-2005	NA	Wolfgang09	5.3	806.7	21	-8.8	Dfb
insecta	Coleoptera	Curculionidae	Pityogenes	chalcographus	NA	10	3	1	wolb	Finland	Kangashakki	62.5302	25.5994	2003-2005	NA	Wolfgang09	2.7	882.3	20.8	-12.9	Dfc
insecta	Coleoptera	Curculionidae	Pityogenes	chalcographus	NA	7	6	1	wolb	Finland	Jarvenpaa	60.474	25.0711	2003-2005	NA	Wolfgang09	4.6	827.4	20.9	-9.8	Dfc
insecta	Coleoptera	Curculionidae	Pityogenes	chalcographus	NA	13	3	1	wolb	France	Massif_Central_II	45.7751	2.67315	2003-2005	NA	Wolfgang09	7.9	541.3	21.6	-2.9	Cfb
insecta	Coleoptera	Curculionidae	Pityogenes	chalcographus	NA	10	0	1	wolb	France	Raon_sur_Plaine	48.5076	7.09797	2003-2005	NA	Wolfgang09	7.7	610.2	21.4	-3.4	Cfb
insecta	Coleoptera	Curculionidae	Pityogenes	chalcographus	NA	3	0	1	wolb	France	Massif_Central_I	45.7751	2.67315	2003-2005	NA	Wolfgang09	7.9	541.3	21.6	-2.9	Cfb
insecta	Coleoptera	Curculionidae	Pityogenes	chalcographus	NA	13	8	1	wolb	Germany	Heubronn	49.1624	9.10308	2003-2005	NA	Wolfgang09	10.1	646.6	24.3	-2	Cfb
insecta	Coleoptera	Curculionidae	Pityogenes	chalcographus	NA	13	5	1	wolb	Germany	Kropp	54.4018	9.48964	2003-2005	NA	Wolfgang09	8.4	591	21	-1.9	Cfb
insecta	Coleoptera	Curculionidae	Pityogenes	chalcographus	NA	9	4	1	wolb	Germany	Tharandt	50.9604	13.4852	2003-2005	NA	Wolfgang09	7.4	672.3	21.4	-4.3	Cfb
insecta	Coleoptera	Curculionidae	Pityogenes	chalcographus	NA	7	7	1	wolb	Germany	Harz	51.7322	10.7038	2003-2005	NA	Wolfgang09	6.5	625	19.6	-4.5	Cfb
insecta	Coleoptera	Curculionidae	Pityogenes	chalcographus	NA	13	7	1	wolb	Greece	Drama	41.1498	24.1248	2003-2005	NA	Wolfgang09	14.4	708.8	30.5	0.8	Cfb
insecta	Coleoptera	Curculionidae	Pityogenes	chalcographus	NA	14	8	1	wolb	Italy	Pavullo	44.3334	10.8274	2003-2005	NA	Wolfgang09	10.2	671.7	24.8	-1.7	Cfb
insecta	Coleoptera	Curculionidae	Pityogenes	chalcographus	NA	13	0	1	wolb	Italy	Tolmezzo	46.4035	13.0048	2003-2005	NA	Wolfgang09	10.6	691.4	26.4	-3.6	Cfb
insecta	Coleoptera	Curculionidae	Pityogenes	chalcographus	NA	12	3	1	wolb	Italy	Asiago	45.8759	11.5048	2003-2005	NA	Wolfgang09	7.1	675.1	22	-5.9	Cfa
insecta	Coleoptera	Curculionidae	Pityogenes	chalcographus	NA	12	2	1	wolb	Italy	Bressanone	46.7128	11.6187	2003-2005	NA	Wolfgang09	4.8	652.5	19.4	-8.6	Cfb
insecta	Coleoptera	Curculionidae	Pityogenes	chalcographus	NA	15	2	1	wolb	Lithuania	Vilnius	54.699	25.1125	2003-2005	NA	Wolfgang09	6.2	832.6	22.5	-8.6	Dfb
insecta	Coleoptera	Curculionidae	Pityogenes	chalcographus	NA	17	5	1	wolb	Norway	Eina	60.6282	10.5913	2003-2005	NA	Wolfgang09	2.8	803.8	19.5	-11.1	Dfc
insecta	Coleoptera	Curculionidae	Pityogenes	chalcographus	NA	16	4	1	wolb	Norway	Rora	63.8577	11.3915	2003-2005	NA	Wolfgang09	4.7	624.4	17.6	-6.8	Cfb
insecta	Coleoptera	Curculionidae	Pityogenes	chalcographus	NA	17	4	1	wolb	Poland	Zwardon	49.5054	18.9421	2003-2005	NA	Wolfgang09	6.1	732.9	21.4	-8.4	Cfb
insecta	Coleoptera	Curculionidae	Pityogenes	chalcographus	NA	15	15	1	wolb	Poland	Hajnowka	52.744	23.5586	2003-2005	NA	Wolfgang09	7	806.1	23.2	-7.6	Dfb
insecta	Coleoptera	Curculionidae	Pityogenes	chalcographus	NA	8	0	1	wolb	Poland	Chojnice	53.6949	17.5226	2003-2005	NA	Wolfgang09	7	810.9	22.4	-7.7	Dfb
insecta	Coleoptera	Curculionidae	Pityogenes	chalcographus	NA	3	1	1	wolb	Poland	Beskid_Slaski	49.5333	18.8997	2003-2005	NA	Wolfgang09	6.6	742.7	22.1	-8.1	Cfb
insecta	Coleoptera	Curculionidae	Pityogenes	chalcographus	NA	9	4	1	wolb	Romania	Bistra	46.3788	23.096	2003-2005	NA	Wolfgang09	7.8	720.8	23	-6.3	Dfb
insecta	Coleoptera	Curculionidae	Pityogenes	chalcographus	NA	8	7	1	wolb	Romania	Sacele	45.6185	25.6756	2003-2005	NA	Wolfgang09	6.6	767.7	22.2	-9	Dfb
insecta	Coleoptera	Curculionidae	Pityogenes	chalcographus	NA	15	5	1	wolb	Sweden	Overkalix	66.3273	22.8304	2003-2005	NA	Wolfgang09	0.6	971.3	19.6	-17.3	Dfc
insecta	Coleoptera	Curculionidae	Pityogenes	chalcographus	NA	15	1	1	wolb	Sweden	Rolfstorp	57.1492	12.425	2003-2005	NA	Wolfgang09	7.5	658.3	20.3	-5.2	Cfb
insecta	Coleoptera	Curculionidae	Pityogenes	chalcographus	NA	9	1	1	wolb	Switzerland	Bielersee	47.0938	7.11933	2003-2005	NA	Wolfgang09	6.8	613.6	20.5	-4.6	Cfb
insecta	Coleoptera	Curculionidae	Pityogenes	chalcographus	NA	3	2	1	wolb	Switzerland	Birmersdorf	47.3553	8.42166	2003-2005	NA	Wolfgang09	8.7	629	22.6	-2.7	Cfb
insecta	Coleoptera	Curculionidae	Polygraphus	sp.	NA	4	0	1	wolb	Austria	approx	47.0334	10.7458	NA	NA	Kawasaki16	1.7	580.9	14	-9.5	Dfb
insecta	Coleoptera	Curculionidae	Pseudopthalmus	sp.	NA	1	0	1	wolb	Panama	BarroColoradoIsland_Gamboa_PanamaCity_CerroCampana	9	-79.7	1993-1994	Aug-Nov	Werren95	26.5	57	31.9	22	Am
insecta	Coleoptera	Curculionidae	Rhinostomus	barbirostris	NA	1	0	1	wolb	Panama	BarroColoradoIsland_Gamboa_PanamaCity_CerroCampana	9	-79.7	1993-1994	Aug-Nov	Werren95	26.5	57	31.9	22	Am
insecta	Coleoptera	Curculionidae	Rhynchophorus	palmarum	NA	1	0	1	wolb	Panama	BarroColoradoIsland_Gamboa_PanamaCity_CerroCampana	9	-79.7	1993-1994	Aug-Nov	Werren95	26.5	57	31.9	22	Am
insecta	Coleoptera	Curculionidae	Sitophilus	granarius	NA	1	0	1	wolb	UK	approx	51.6517	-0.242041	NA	NA	Kageyama10	9.9	485.9	21.9	0.5	Cfb
insecta	Coleoptera	Curculionidae	Sitophilus	oryzae	NA	1	0	1	wolb	Italy	approx	42.409	12.3468	NA	NA	Kageyama10	14.4	629.9	30.2	2.5	Csa
insecta	Coleoptera	Curculionidae	Sitophilus	oryzae	NA	1	0	1	card	NA	NA	NA	NA	NA	NA	ZchoriFein04	NA	NA	NA	NA	NA
insecta	Coleoptera	Curculionidae	Sitophilus	oryzae	NA	1	1	1	wolb	NA	NA	NA	NA	NA	NA	ZchoriFein04	NA	NA	NA	NA	NA
insecta	Coleoptera	Curculionidae	Sitophilus	zeamais	NA	1	0	1	wolb	Japan	Kanagawa	35.4461	139.235	NA	NA	Kageyama10	11.2	776.3	27.1	-5.5	Cfa
insecta	Coleoptera	Curculionidae	Sitophilus	zeamais	NA	1	0	1	wolb	Japan	Tsukuba	36.0855	140.014	NA	NA	Kageyama10	14	797.4	30.3	-3.3	Cfa
insecta	Coleoptera	Curculionidae	Stegotes	sp.	NA	1	0	1	wolb	Panama	BarroColoradoIsland_Gamboa_PanamaCity_CerroCampana	9	-79.7	1993-1994	Aug-Nov	Werren95	26.5	57	31.9	22	Am
insecta	Coleoptera	Curculionidae	Taphrorychus	bicolor	NA	5	4	1	wolb	Austria	approx	47.0334	10.7458	NA	NA	Kawasaki16	1.7	580.9	14	-9.5	Dfb
insecta	Coleoptera	Curculionidae	Tomicus	destuens	NA	4	0	1	wolb	Austria	approx	47.0334	10.7458	NA	NA	Kawasaki16	1.7	580.9	14	-9.5	Dfb
insecta	Coleoptera	Curculionidae	Tomicus	piniperda	NA	4	0	1	wolb	Austria	approx	47.0334	10.7458	NA	NA	Kawasaki16	1.7	580.9	14	-9.5	Dfb
insecta	Coleoptera	Curculionidae	Unid.	sp.	NA	1	0	1	wolb	US_IN	WoodnrBloomington	39.1667	-86.4833	1994-1998	Aug-Nov	Werren00	11.5	904.9	29.9	-7.1	Cfa
insecta	Coleoptera	Curculionidae	Unid.	sp.	NA	1	0	1	wolb	US_IN	WoodnrBloomington	39.1667	-86.4833	1994-1998	Aug-Nov	Werren00	11.5	904.9	29.9	-7.1	Cfa
insecta	Coleoptera	Curculionidae	Unid.	sp.	NA	1	0	1	wolb	US_IN	WoodnrBloomington	39.1667	-86.4833	1994-1998	Aug-Nov	Werren00	11.5	904.9	29.9	-7.1	Cfa
insecta	Coleoptera	Curculionidae	Unid.	sp.	NA	1	1	1	wolb	Panama	BarroColoradoIsland_Gamboa_PanamaCity_CerroCampana	9	-79.7	1993-1994	Aug-Nov	Werren95	26.5	57	31.9	22	Am
insecta	Coleoptera	Curculionidae	Xestolabus	corvinus	NA	1	0	1	wolb	Panama	BarroColoradoIsland_Gamboa_PanamaCity_CerroCampana	9	-79.7	1993-1994	Aug-Nov	Werren95	26.5	57	31.9	22	Am
insecta	Coleoptera	Curculionidae	Xylosandrus	germanus	NA	11	11	1	wolb	Japan	Furano	43.1667	142.335	2005-2006	NA	Kawasaki10	5.6	1045.8	24.9	-14.1	Dfb
insecta	Coleoptera	Curculionidae	Xylosandrus	germanus	NA	10	10	1	wolb	Japan	Aichi	35.0649	137.096	2005-2006	NA	Kawasaki10	15.6	811.7	32	0.1	Cfa
insecta	Coleoptera	Curculionidae	Xylosandrus	germanus	NA	10	10	1	wolb	Japan	Furano	43.1667	142.335	2005-2006	NA	Kawasaki10	5.6	1045.8	24.9	-14.1	Dfb
insecta	Coleoptera	Curculionidae	Xylosandrus	germanus	NA	10	10	1	wolb	Japan	Iwate	39.8833	141.138	2005-2006	NA	Kawasaki10	9.5	899.2	27.3	-6.9	Dfa
insecta	Coleoptera	Curculionidae	Xylosandrus	germanus	NA	10	10	1	wolb	Japan	Sapporo	43.062	2.31245	2005-2006	NA	Kawasaki10	13.1	572.9	27.1	1.7	Cfa
insecta	Coleoptera	Curculionidae	Xylosandrus	germanus	NA	9	9	1	wolb	Japan	Saitama	35.9167	139.579	2005-2006	NA	Kawasaki10	14.8	774.5	30.7	-1.3	Cfa
insecta	Coleoptera	Curculionidae	Xylosandrus	germanus	NA	9	9	1	wolb	Japan	Tottori	35.4	134.053	2005-2006	NA	Kawasaki10	10.9	827.9	27.6	-4.3	Cfa
insecta	Coleoptera	Curculionidae	Xylosandrus	germanus	NA	8	8	1	wolb	Japan	Iwate	39.8833	141.138	2005-2006	NA	Kawasaki10	9.5	899.2	27.3	-6.9	Dfa
insecta	Coleoptera	Curculionidae	Xylosandrus	germanus	NA	8	8	1	wolb	Japan	Miyazaki	31.8937	131.207	2005-2006	NA	Kawasaki10	15.9	718.4	30.5	0.1	Cfa
insecta	Coleoptera	Curculionidae	Xylosandrus	germanus	NA	8	8	1	wolb	Japan	Yamagata	38.65	140.215	2005-2006	NA	Kawasaki10	10.6	909.8	28.9	-4.8	Cfa
insecta	Coleoptera	Curculionidae	Xylosandrus	germanus	NA	7	7	1	wolb	Japan	Aichi	35.0649	137.096	2005-2006	NA	Kawasaki10	15.6	811.7	32	0.1	Cfa
insecta	Coleoptera	Curculionidae	Xylosandrus	germanus	NA	7	7	1	wolb	Japan	Kochi	33.5702	133.44	2005-2006	NA	Kawasaki10	15.7	736.8	30.3	0.6	Cfa
insecta	Coleoptera	Curculionidae	Xylosandrus	germanus	NA	7	7	1	wolb	Japan	Yamagata	38.65	140.215	2005-2006	NA	Kawasaki10	10.6	909.8	28.9	-4.8	Cfa
insecta	Coleoptera	Curculionidae	Xylosandrus	germanus	NA	6	6	1	wolb	Japan	Saitama	35.9167	139.579	2005-2006	NA	Kawasaki10	14.8	774.5	30.7	-1.3	Cfa
insecta	Coleoptera	Dermestidae	Anthrenus	sp.	NA	1	0	1	card	US_CA	Riverside	33.953	-117.47	NA	NA	Weeks03	18	464	33.8	4.8	BSk
insecta	Coleoptera	Dermestidae	Anthrenus	sp.	NA	1	0	1	card	US_CA	Riverside	33.953	-117.47	NA	NA	Weeks03	18	464	33.8	4.8	BSk
insecta	Coleoptera	Dermestidae	Anthrenus	sp.	NA	1	1	1	wolb	US_CA	Riverside	33.953	-117.47	NA	NA	Weeks03	18	464	33.8	4.8	BSk
insecta	Coleoptera	Dermestidae	Anthrenus	sp.	NA	1	0	1	wolb	US_CA	Riverside	33.953	-117.47	NA	NA	Weeks03	18	464	33.8	4.8	BSk
insecta	Coleoptera	Dermestidae	Anthrenus	verbasci	NA	1	1	1	wolb	Japan	Tsukuba	36.0855	140.014	NA	NA	Kageyama10	14	797.4	30.3	-3.3	Cfa
insecta	Coleoptera	Dermestidae	Dermestes	lardarius	NA	1	0	1	wolb	US_IN	WoodnrBloomington	39.1667	-86.4833	1994-1998	Aug-Nov	Werren00	11.5	904.9	29.9	-7.1	Cfa
insecta	Coleoptera	Dermestidae	Dermestes	sp.	NA	20	0	1	card	France	MontBarri	43.6	3.20994	2004	NA	Duron08	12.8	575.8	27.5	0.9	Csb
insecta	Coleoptera	Dermestidae	Dermestes	sp.	NA	20	0	1	wolb	France	MontBarri	43.6	3.20994	2004	NA	Duron08	12.8	575.8	27.5	0.9	Csb
insecta	Coleoptera	Dermestidae	Dermestes	sp.	NA	1	0	1	wolb	India	approx	18.5109	74.5264	NA	NA	Prakash06	25.8	292.1	38.7	12.7	BSh
insecta	Coleoptera	Dermestidae	Trogoderma	granarium	NA	1	0	1	wolb	Israel	approx	32.721	35.41	NA	NA	Kageyama10	20.3	564.2	33.1	8.2	Csa
insecta	Coleoptera	Dermestidae	Trogoderma	granarium	NA	1	0	1	card	NA	NA	NA	NA	NA	NA	ZchoriFein04	NA	NA	NA	NA	NA
insecta	Coleoptera	Dermestidae	Trogoderma	granarium	NA	1	0	1	wolb	NA	NA	NA	NA	NA	NA	ZchoriFein04	NA	NA	NA	NA	NA
insecta	Coleoptera	Dermestidae	Unid.	sp.	NA	1	0	1	card	South_Korea	Sangju	36.4126	128.152	2007	Apr-Jun	Jeong09	12.2	940.2	29.9	-6.9	Cwa
insecta	Coleoptera	Dermestidae	Unid.	sp.	NA	1	0	1	wolb	South_Korea	Sangju	36.4126	128.152	2007	Apr-Jun	Jeong09	12.2	940.2	29.9	-6.9	Cwa
insecta	Coleoptera	Dysticidae	Deronectes	angelinii	NA	1	1	1	wolb	Italy	Marche_Ascoli_Piceno_province_Quintodecimo	42.7633	13.3869	NA	NA	Garcia-Vazquez16	12.2	655.3	27.4	0	Cfb
insecta	Coleoptera	Dysticidae	Deronectes	angusi	NA	1	0	1	wolb	Spain	Galicia_Lugo_province_Viveiro	43.6214	-7.63639	NA	NA	Garcia-Vazquez16	13.3	366.2	23.2	5.1	Csb
insecta	Coleoptera	Dysticidae	Deronectes	aubei	aubei	2	2	1	wolb	Germany	Baden_Wurttemberg_Karlsruhe_region_Eyachmuhle	48.8086	8.55972	NA	NA	Garcia-Vazquez16	8.5	642.6	22.9	-3.4	Cfb
insecta	Coleoptera	Dysticidae	Deronectes	aubei	aubei	2	2	1	wolb	Italy	Lombardia_Brescia_province_Val_Palot	45.7894	10.1772	NA	NA	Garcia-Vazquez16	6.3	641.6	20.5	-5.7	Cfb
insecta	Coleoptera	Dysticidae	Deronectes	aubei	aubei	1	0	1	wolb	Italy	Emilia_Romagna_Modena_province_Fanano	44.1747	10.7989	NA	NA	Garcia-Vazquez16	8.9	637.7	22.6	-1.9	Cfb
insecta	Coleoptera	Dysticidae	Deronectes	aubei	sanfilippi	1	1	1	wolb	France	Languedoc_Rousillon_Pyrenees_Orientales_department_Prats_de_Mollo	42.4433	2.46139	NA	NA	Garcia-Vazquez16	8.1	537.8	21.1	-1.5	Cfb
insecta	Coleoptera	Dysticidae	Deronectes	aubei	sanfilippi	1	0	1	wolb	Spain	Cantabria_Barago	43.0397	-4.61833	NA	NA	Garcia-Vazquez16	6	510.7	20.5	-4.1	Cfb
insecta	Coleoptera	Dysticidae	Deronectes	aubei	sanfilippi	1	0	1	wolb	Spain	Cantabria_Canal_del_Valle	43.2669	-4.63306	NA	NA	Garcia-Vazquez16	12	429.9	23.2	2.8	Cfb
insecta	Coleoptera	Dysticidae	Deronectes	aubei	sanfilippi	1	0	1	wolb	Spain	Cantabria_Urdon_river	48.533	8.27639	NA	NA	Garcia-Vazquez16	7.6	631.4	21.6	-4.3	Cfb
insecta	Coleoptera	Dysticidae	Deronectes	aubei	sanfilippi	1	0	1	wolb	Spain	Cantabria_Vada__Quiviesa_river	43.0894	-4.675	NA	NA	Garcia-Vazquez16	9.7	477.2	22.9	-0.3	Cfb
insecta	Coleoptera	Dysticidae	Deronectes	aubei	sanfilippi	1	0	1	wolb	Spain	Cantabria_Vada__Vejo_river	43.09	-4.67583	NA	NA	Garcia-Vazquez16	9.7	477.2	22.9	-0.3	Cfb
insecta	Coleoptera	Dysticidae	Deronectes	aubei	sanfilippi	1	0	1	wolb	Spain	Castilla_y_Leon_Leon_province_Picos_de_Europa	43.1094	-4.94444	NA	NA	Garcia-Vazquez16	5.9	510.6	20.3	-4.3	Cfb
insecta	Coleoptera	Dysticidae	Deronectes	aubei	sanfilippi	1	1	1	wolb	Spain	Cataluna_Lleida_province_San_Juan_de_Toran	42.825	0.777778	NA	NA	Garcia-Vazquez16	6.2	545.1	19.4	-4.2	Cfb
insecta	Coleoptera	Dysticidae	Deronectes	aubei	NA	1	1	1	wolb	France	Auvergne_Cantal_department__Laveissiere	45.1153	2.81306	NA	NA	Garcia-Vazquez16	7	539.4	20.8	-3.7	Cfb
insecta	Coleoptera	Dysticidae	Deronectes	aubei	NA	1	1	1	wolb	France	Auvergne_Cantal_department_Vedrines_St__Loup	45.0668	3.3075	NA	NA	Garcia-Vazquez16	7.9	558.8	22.1	-3.1	Cfb
insecta	Coleoptera	Dysticidae	Deronectes	aubei	NA	1	1	1	wolb	France	Languedoc_Rousillon_Gard_province_Le_Vigan	44.0375	3.5825	NA	NA	Garcia-Vazquez16	9.9	568.5	24.5	-1.4	Cfb
insecta	Coleoptera	Dysticidae	Deronectes	brannanii	NA	1	0	1	wolb	Spain	Soller_Mallorca	39.7625	2.71083	NA	NA	Garcia-Vazquez16	15.5	517.9	27.7	5.5	Csb
insecta	Coleoptera	Dysticidae	Deronectes	brannanii	NA	1	0	1	wolb	Spain	Ternelles_Mallorca	39.8936	3.00417	NA	NA	Garcia-Vazquez16	16	512.8	28	6.2	Csb
insecta	Coleoptera	Dysticidae	Deronectes	costipennis	costipennis	1	0	1	wolb	Spain	Castilla_y_Leon_Leon_province_Valverdin	42.9481	-5.53611	NA	NA	Garcia-Vazquez16	8	529.9	23.2	-2.9	Csb
insecta	Coleoptera	Dysticidae	Deronectes	delarouzei	NA	1	1	1	wolb	Spain	Aragon_Huesca_province_Aragues_del_Puerto	42.7547	-0.633333	NA	NA	Garcia-Vazquez16	4	527.7	17.2	-6.2	Cfb
insecta	Coleoptera	Dysticidae	Deronectes	delarouzei	NA	1	1	1	wolb	Spain	Castilla_y_Leon_Leon_province_Puerto_de_San_Glorio	43.1094	-4.94444	NA	NA	Garcia-Vazquez16	5.9	510.6	20.3	-4.3	Cfb
insecta	Coleoptera	Dysticidae	Deronectes	delarouzei	NA	1	1	1	wolb	Spain	Cataluna_Barcelona_province_Montseny	41.7567	2.41389	NA	NA	Garcia-Vazquez16	12.4	544.6	24.9	2.4	Cfb
insecta	Coleoptera	Dysticidae	Deronectes	delarouzei	NA	1	1	1	wolb	Spain	Cataluna_Lleida_province_Llesp	42.4569	0.749167	NA	NA	Garcia-Vazquez16	8.9	569.8	22.9	-2.3	Cfb
insecta	Coleoptera	Dysticidae	Deronectes	delarouzei	NA	1	1	1	wolb	Spain	Cataluna_Lleida_province_Rubio	42.3783	1.22417	NA	NA	Garcia-Vazquez16	3.8	542	16.8	-6	Cfb
insecta	Coleoptera	Dysticidae	Deronectes	latus	NA	1	0	1	wolb	Slovenia	Carniola_Cerkniscica	45.7656	14.3611	NA	NA	Garcia-Vazquez16	9.7	668	24.5	-2.5	Cfb
insecta	Coleoptera	Dysticidae	Deronectes	latus	NA	1	0	1	wolb	UK	Isle_of_Skye_Broadford_river	57.2325	-5.93944	NA	NA	Garcia-Vazquez16	8.3	382.3	16.8	0.7	Cfb
insecta	Coleoptera	Dysticidae	Deronectes	moestus	inconspectus	1	0	1	wolb	Croatia	Istria_county_Vranja	45.3186	14.1392	NA	NA	Garcia-Vazquez16	12.7	626.7	26.3	1.7	Cfa
insecta	Coleoptera	Dysticidae	Deronectes	moestus	inconspectus	1	1	1	wolb	France	Provence_Alpes_Cote_Dazur_Var_department_Comps_	43.7158	6.55111	NA	NA	Garcia-Vazquez16	9.4	559.2	22.6	-1.7	Csb
insecta	Coleoptera	Dysticidae	Deronectes	moestus	inconspectus	1	0	1	wolb	France	Provence_Alpes_Cote_Dazur_Var_department_Comps_	43.7158	6.55111	NA	NA	Garcia-Vazquez16	9.4	559.2	22.6	-1.7	Csb
insecta	Coleoptera	Dysticidae	Deronectes	moestus	inconspectus	1	1	1	wolb	Greece	Epirus_region_Kipoi	39.8617	20.7861	NA	NA	Garcia-Vazquez16	11	642.8	27.5	-1.8	Csa
insecta	Coleoptera	Dysticidae	Deronectes	moestus	inconspectus	1	1	1	wolb	Greece	Peloponnese_Achaia_region_Erymanthos_Mountains	37.9236	21.7514	NA	NA	Garcia-Vazquez16	10.6	606.1	26.2	-1.1	Csa
insecta	Coleoptera	Dysticidae	Deronectes	moestus	inconspectus	2	2	1	wolb	Italy	Palermo_province_Parco_naturalle_delle_Madonie	42.7608	-0.830278	NA	NA	Garcia-Vazquez16	8.1	535.8	21.8	-2.9	Cfb
insecta	Coleoptera	Dysticidae	Deronectes	moestus	inconspectus	1	0	1	wolb	Italy	Abruzzo_LAquila_province_Mascioni	42.5325	13.3542	NA	NA	Garcia-Vazquez16	8.1	623.4	22.1	-2.8	Cfb
insecta	Coleoptera	Dysticidae	Deronectes	moestus	inconspectus	1	0	1	wolb	Italy	Abruzzo_LAquila_province_Mascioni	42.5325	13.3347	NA	NA	Garcia-Vazquez16	8.1	623.4	22.1	-2.8	Cfb
insecta	Coleoptera	Dysticidae	Deronectes	moestus	inconspectus	1	1	1	wolb	Italy	Mesina_province_Cesaro-Randazzo	37.8333	14.7936	NA	NA	Garcia-Vazquez16	14.1	587.4	27.5	4	Csa
insecta	Coleoptera	Dysticidae	Deronectes	moestus	inconspectus	1	0	1	wolb	Italy	Porto_Azurro_Madonna_di_Monserrato	42.785	10.3917	NA	NA	Garcia-Vazquez16	15.6	530.8	27.6	6.4	Csa
insecta	Coleoptera	Dysticidae	Deronectes	moestus	inconspectus	1	1	1	wolb	Italy	Veneto_Treviso_province_Collalto	45.8722	12.1881	NA	NA	Garcia-Vazquez16	12.4	714.6	28.2	-2	Cfa
insecta	Coleoptera	Dysticidae	Deronectes	moestus	inconspectus	1	0	1	wolb	Morocco	Meknes_Tafilalet_Khenifra_Province_Kerrouchen__Middle_Atlas	32.8061	-5.27056	NA	NA	Garcia-Vazquez16	12.7	649.8	32.9	-2.4	BSk
insecta	Coleoptera	Dysticidae	Deronectes	moestus	inconspectus	1	0	1	wolb	Morocco	Sus_Masa_Draa_Ouarzazate_province_Tachokchte	30.7933	-7.52417	NA	NA	Garcia-Vazquez16	12.5	668.7	32.8	-4.3	Csb
insecta	Coleoptera	Dysticidae	Deronectes	moestus	inconspectus	1	0	1	wolb	Spain	Andalucia_Jaen_province_Hornos_del_Segura	38.235	-2.72833	NA	NA	Garcia-Vazquez16	14.6	652.4	32.7	1.6	Csa
insecta	Coleoptera	Dysticidae	Deronectes	moestus	inconspectus	1	0	1	wolb	Spain	Andalucia_Jaen_province_Sierra_de_Cazorla	38.1025	-2.81278	NA	NA	Garcia-Vazquez16	14.2	654.3	32.3	1.2	Csa
insecta	Coleoptera	Dysticidae	Deronectes	moestus	inconspectus	1	0	1	wolb	Spain	Aragon_Huesca_province_Bernues	42.4439	-0.614167	NA	NA	Garcia-Vazquez16	10.2	548.3	24.4	-1.3	Cfa
insecta	Coleoptera	Dysticidae	Deronectes	moestus	inconspectus	1	1	1	wolb	Spain	Aragon_Teruel_province_Aliaga	40.6814	-0.684722	NA	NA	Garcia-Vazquez16	9.8	604.6	24.2	-1.9	Cfb
insecta	Coleoptera	Dysticidae	Deronectes	moestus	inconspectus	1	1	1	wolb	Spain	Cataluna_Lleida_province_Llinars	42.1033	1.69	NA	NA	Garcia-Vazquez16	10.2	563.7	23.6	-0.2	Cfb
insecta	Coleoptera	Dysticidae	Deronectes	moestus	moestus	1	1	1	wolb	Italy	Ogliastra_province_Codula_di_Luna	40.0044	9.56028	NA	NA	Garcia-Vazquez16	15.9	535.7	28.7	6.4	Csa
insecta	Coleoptera	Dysticidae	Deronectes	platynotus	NA	1	0	1	wolb	Germany	Bayern_Schwaben_Region_Wertach	47.5861	10.3811	NA	NA	Garcia-Vazquez16	5.8	634.4	19.6	-7.1	Cfb
insecta	Coleoptera	Dysticidae	Deronectes	platynotus	NA	1	0	1	wolb	Macedonia	Ohrid_district_Recica	41.1978	20.9297	NA	NA	Garcia-Vazquez16	8.4	648.7	24.2	-4.8	Csb
insecta	Coleoptera	Dysticidae	Deronectes	semirufus	NA	1	1	1	wolb	France	Provence_Alpes_Cote_Dazur_Alpes_Maritimes_department_Monti	43.8244	7.48222	NA	NA	Garcia-Vazquez16	13.3	531	25.3	2.9	Csb
insecta	Coleoptera	Dysticidae	Deronectes	semirufus	NA	1	1	1	wolb	Italy	Abruzzo_LAquila_province_Pescasseroli__Abruzzo_N_P	41.8514	13.7769	NA	NA	Garcia-Vazquez16	7.9	618	21.7	-2.6	Csb
insecta	Coleoptera	Dysticidae	Deronectes	semirufus	NA	1	1	1	wolb	Italy	Marche_Ascoli_Piceno_province_Acquasanta	42.7247	13.3828	NA	NA	Garcia-Vazquez16	10.1	645.2	24.7	-1.5	Cfb
insecta	Coleoptera	Dysticidae	Deronectes	semirufus	NA	1	1	1	wolb	Italy	Mesina_province_Parco_dei_Nebrodi_river_Torti	37.8939	14.6517	NA	NA	Garcia-Vazquez16	10.2	624.3	23.8	0.3	Csa
insecta	Coleoptera	Dysticidae	Deronectes	semirufus	NA	1	1	1	wolb	Italy	Toscana_Arezzo_province_Fosso_de_Camaldoli	43.8181	11.8064	NA	NA	Garcia-Vazquez16	8.2	619	21.4	-1.8	Cfa
insecta	Coleoptera	Dysticidae	Deronectes	toledoi	NA	1	0	1	wolb	Turkey	Erzurum_province_Toprakkalekoyu	40.2397	40.9881	NA	NA	Garcia-Vazquez16	4.7	825.4	24.2	-12.1	Dfb
insecta	Coleoptera	Dytiscidae	Guignotus	pusillus	NA	12	0	1	card	France	Notre_Dame_de_Londres	43.8257	3.71953	2003	NA	Duron08	12.9	585.3	27.8	0.7	Csb
insecta	Coleoptera	Dytiscidae	Guignotus	pusillus	NA	12	12	1	wolb	France	Notre_Dame_de_Londres	43.8257	3.71953	2003	NA	Duron08	12.9	585.3	27.8	0.7	Csb
insecta	Coleoptera	Elateridae	Aeoloderma	brachmana	NA	2	0	1	wolb	Thailand	approx	14.0167	99.0533	1997-2000	Jun-Oct	Kittayapong03	26.2	158.7	35.1	16.8	Aw
insecta	Coleoptera	Elateridae	Semiotus	insignis	NA	1	0	1	wolb	Panama	BarroColoradoIsland_Gamboa_PanamaCity_CerroCampana	9	-79.7	1993-1994	Aug-Nov	Werren95	26.5	57	31.9	22	Am
insecta	Coleoptera	Elateridae	Semiotus	liqneus	NA	1	0	1	wolb	Panama	BarroColoradoIsland_Gamboa_PanamaCity_CerroCampana	9	-79.7	1993-1994	Aug-Nov	Werren95	26.5	57	31.9	22	Am
insecta	Coleoptera	Elateridae	Unid.	sp.	NA	1	0	1	wolb	US_IN	WoodnrBloomington	39.1667	-86.4833	1994-1998	Aug-Nov	Werren00	11.5	904.9	29.9	-7.1	Cfa
insecta	Coleoptera	Elmidae	Unid.	sp.	NA	2	0	1	wolb	US_MO	centroid	21.3621	-157.956	2014-2015	May-Aug	Sazama16	24.2	146.9	30.3	17.7	Cfb
insecta	Coleoptera	Endomychidae	Stenotarsus	rotundus	NA	2	0	1	wolb	Panama	BarroColoradoIsland_Gamboa_PanamaCity_CerroCampana	9	-79.7	1993-1994	Aug-Nov	Werren95	26.5	57	31.9	22	Am
insecta	Coleoptera	Erotylidae	Cypherotylus	sp.	NA	1	0	1	wolb	Panama	BarroColoradoIsland_Gamboa_PanamaCity_CerroCampana	9	-79.7	1993-1994	Aug-Nov	Werren95	26.5	57	31.9	22	Am
insecta	Coleoptera	Erotylidae	Megalodacne	sp.	NA	1	0	1	wolb	US_IN	WoodnrBloomington	39.1667	-86.4833	1994-1998	Aug-Nov	Werren00	11.5	904.9	29.9	-7.1	Cfa
insecta	Coleoptera	Erotylidae	Pselaphacus	conspersus	NA	2	0	1	wolb	Panama	BarroColoradoIsland_Gamboa_PanamaCity_CerroCampana	9	-79.7	1993-1994	Aug-Nov	Werren95	26.5	57	31.9	22	Am
insecta	Coleoptera	Erotylidae	Pselaphacus	vitticollis	NA	1	0	1	wolb	Panama	BarroColoradoIsland_Gamboa_PanamaCity_CerroCampana	9	-79.7	1993-1994	Aug-Nov	Werren95	26.5	57	31.9	22	Am
insecta	Coleoptera	Geotrupidae	Bolbocerastes	regalis	NA	1	0	1	card	US_CA	Riverside	33.953	-117.47	NA	NA	Weeks03	18	464	33.8	4.8	BSk
insecta	Coleoptera	Geotrupidae	Bolbocerastes	regalis	NA	1	0	1	wolb	US_CA	Riverside	33.953	-117.47	NA	NA	Weeks03	18	464	33.8	4.8	BSk
insecta	Coleoptera	Geotrupidae	Geotrupes	splendidus	NA	1	0	1	card	US_CA	Riverside	33.953	-117.47	NA	NA	Weeks03	18	464	33.8	4.8	BSk
insecta	Coleoptera	Geotrupidae	Geotrupes	splendidus	NA	1	0	1	wolb	US_CA	Riverside	33.953	-117.47	NA	NA	Weeks03	18	464	33.8	4.8	BSk
insecta	Coleoptera	Geotrupidae	Geotrupes	stercorarius	NA	3	0	1	card	France	MontBarri	43.6	3.20994	2004	NA	Duron08	12.8	575.8	27.5	0.9	Csb
insecta	Coleoptera	Geotrupidae	Geotrupes	stercorarius	NA	3	0	1	wolb	France	MontBarri	43.6	3.20994	2004	NA	Duron08	12.8	575.8	27.5	0.9	Csb
insecta	Coleoptera	Glaresidae	Glaresis	ecostata	NA	1	0	1	card	US_CA	Riverside	33.953	-117.47	NA	NA	Weeks03	18	464	33.8	4.8	BSk
insecta	Coleoptera	Glaresidae	Glaresis	ecostata	NA	1	0	1	wolb	US_CA	Riverside	33.953	-117.47	NA	NA	Weeks03	18	464	33.8	4.8	BSk
insecta	Coleoptera	Gyrinidae	Dineutus	sp.	NA	1	0	1	wolb	US_MO	centroid	21.3621	-157.956	2014-2015	May-Aug	Sazama16	24.2	146.9	30.3	17.7	Cfb
insecta	Coleoptera	Haliplidae	Unid.	sp.	NA	1	1	1	wolb	Brazil	approx	-22.9799	-49.403	NA	NA	deOliveira15	20	241.2	28.8	9.3	Cfa
insecta	Coleoptera	Hybosoridae	Hybosorus	illigeri	NA	1	0	1	card	US_CA	Riverside	33.953	-117.47	NA	NA	Weeks03	18	464	33.8	4.8	BSk
insecta	Coleoptera	Hybosoridae	Hybosorus	illigeri	NA	1	0	1	wolb	US_CA	Riverside	33.953	-117.47	NA	NA	Weeks03	18	464	33.8	4.8	BSk
insecta	Coleoptera	Hydrophilidae	Berosus	sp.	NA	8	0	1	wolb	Thailand	approx	14.0167	99.0533	1997-2000	Jun-Oct	Kittayapong03	26.2	158.7	35.1	16.8	Aw
insecta	Coleoptera	Hydrophilidae	Berosus	sp.	NA	8	0	1	wolb	China_Shandong	Yutun_WeishanLake_JiningDistrict	35.4903	116.716	2012-2015	Jun	Wiwatanaratanabutr16	14.2	996.6	32.5	-5.6	Cwa
insecta	Coleoptera	Hydrophilidae	Berosus	sp.	NA	3	0	1	wolb	China_Shandong	Zhanghuang_WeishanLake_JiningDistrict	35.1268	116.584	2012-2015	Jun	Wiwatanaratanabutr16	14.3	989.1	32.4	-5.3	Cwa
insecta	Coleoptera	Hydrophilidae	Berosus	sp.	NA	12	0	1	wolb	Thailand	Central	15.8749	100.295	2012-2015	Jun	Wiwatanaratanabutr16	28.2	195.4	37.5	18	Aw
insecta	Coleoptera	Hydrophilidae	Berosus	sp.	NA	9	0	1	wolb	Thailand	North-East	16.0887	103.267	2012-2015	Jun	Wiwatanaratanabutr16	26.8	231.2	35.8	16	Aw
insecta	Coleoptera	Hydrophilidae	Berosus	sp.	NA	8	0	1	wolb	Thailand	Central	15.8749	100.295	2012-2015	Jun	Wiwatanaratanabutr16	28.2	195.4	37.5	18	Aw
insecta	Coleoptera	Hydrophilidae	Berosus	sp.	NA	6	0	1	wolb	Thailand	North-East	16.0887	103.267	2012-2015	Jun	Wiwatanaratanabutr16	26.8	231.2	35.8	16	Aw
insecta	Coleoptera	Hydrophilidae	Hydrobius	sp.	NA	1	0	1	wolb	US_MO	centroid	21.3621	-157.956	2014-2015	May-Aug	Sazama16	24.2	146.9	30.3	17.7	Cfb
insecta	Coleoptera	Hydrophilidae	Hydrophilus	acuminatus	NA	7	0	1	wolb	Thailand	approx	14.0167	99.0533	1997-2000	Jun-Oct	Kittayapong03	26.2	158.7	35.1	16.8	Aw
insecta	Coleoptera	Hydrophilidae	Hydrophilus	acuminatus	NA	9	0	1	wolb	China_Shandong	Mapo_WeishanLake_JiningDistrict	35.2333	116.741	2012-2015	Jun	Wiwatanaratanabutr16	14.3	991.6	32.5	-5.3	Cwa
insecta	Coleoptera	Hydrophilidae	Hydrophilus	acuminatus	NA	5	0	1	wolb	China_Shandong	Hanzhuang_WeishanLake_JiningDistrict	34.6004	117.374	2012-2015	Jun	Wiwatanaratanabutr16	14.6	973.4	32	-4.4	Cwa
insecta	Coleoptera	Hydrophilidae	Hydrophilus	acuminatus	NA	4	0	1	wolb	China_Shandong	Huancheng_WeishanLake_JiningDistrict	34.6004	117.374	2012-2015	Jun	Wiwatanaratanabutr16	14.6	973.4	32	-4.4	Cwa
insecta	Coleoptera	Hydrophilidae	Hydrophilus	acuminatus	NA	2	0	1	wolb	China_Shandong	Liangcheng_WeishanLake_JiningDistrict	35.1351	116.735	2012-2015	Jun	Wiwatanaratanabutr16	14.2	990.5	32.3	-5.3	Cwa
insecta	Coleoptera	Hydrophilidae	Hydrophilus	acuminatus	NA	16	0	1	wolb	Thailand	Central	15.8749	100.295	2012-2015	Jun	Wiwatanaratanabutr16	28.2	195.4	37.5	18	Aw
insecta	Coleoptera	Hydrophilidae	Hydrophilus	acuminatus	NA	8	0	1	wolb	Thailand	North-East	16.0887	103.267	2012-2015	Jun	Wiwatanaratanabutr16	26.8	231.2	35.8	16	Aw
insecta	Coleoptera	Hydrophilidae	Hydrophilus	acuminatus	NA	7	0	1	wolb	Thailand	Northern	18.7698	99.5269	2012-2015	Jun	Wiwatanaratanabutr16	25.2	255.1	35.5	12.2	Aw
insecta	Coleoptera	Hydrophilidae	Hydrophilus	acuminatus	NA	3	0	1	wolb	Thailand	Southern	8.9978	99.0533	2012-2015	Jun	Wiwatanaratanabutr16	26.9	92.8	34.3	20.3	Am
insecta	Coleoptera	Hydrophilidae	Tropisternus	sp.	NA	1	0	1	wolb	US_MO	centroid	21.3621	-157.956	2014-2015	May-Aug	Sazama16	24.2	146.9	30.3	17.7	Cfb
insecta	Coleoptera	Lucanidae	Lucanus	elephas	NA	1	0	1	card	US_CA	Riverside	33.953	-117.47	NA	NA	Weeks03	18	464	33.8	4.8	BSk
insecta	Coleoptera	Lucanidae	Lucanus	elephas	NA	1	0	1	wolb	US_CA	Riverside	33.953	-117.47	NA	NA	Weeks03	18	464	33.8	4.8	BSk
insecta	Coleoptera	Lycidae	Calypteron	reticulatum	NA	1	0	1	wolb	US_IN	WoodnrBloomington	39.1667	-86.4833	1994-1998	Aug-Nov	Werren00	11.5	904.9	29.9	-7.1	Cfa
insecta	Coleoptera	Lycidae	Calypteron	terminale	NA	1	0	1	wolb	US_IN	WoodnrBloomington	39.1667	-86.4833	1994-1998	Aug-Nov	Werren00	11.5	904.9	29.9	-7.1	Cfa
insecta	Coleoptera	Lycidae	Lycostomus	lateritius	NA	1	0	1	wolb	Thailand	Sai_Yok	14.0167	98.6836	1999-2001	NA	Sintupachee06	22.5	123.3	30.8	13.8	Am
insecta	Coleoptera	Lycidae	Unid.	sp.	NA	1	0	1	wolb	Panama	BarroColoradoIsland_Gamboa_PanamaCity_CerroCampana	9	-79.7	1993-1994	Aug-Nov	Werren95	26.5	57	31.9	22	Am
insecta	Coleoptera	Meloidae	Epicauta	cinerea	NA	1	1	1	wolb	US_IN	WoodnrBloomington	39.1667	-86.4833	1994-1998	Aug-Nov	Werren00	11.5	904.9	29.9	-7.1	Cfa
insecta	Coleoptera	Melyridae	Allonyx	sp.	NA	1	0	1	card	US_CA	Riverside	33.953	-117.47	NA	NA	Weeks03	18	464	33.8	4.8	BSk
insecta	Coleoptera	Melyridae	Allonyx	sp.	NA	1	0	1	wolb	US_CA	Riverside	33.953	-117.47	NA	NA	Weeks03	18	464	33.8	4.8	BSk
insecta	Coleoptera	Melyridae	Apalochrus	rufofasciatus	NA	2	0	1	wolb	Thailand	approx	14.0167	99.0533	1997-2000	Jun-Oct	Kittayapong03	26.2	158.7	35.1	16.8	Aw
insecta	Coleoptera	Melyridae	Listrus	sp.	NA	1	0	1	card	US_CA	Riverside	33.953	-117.47	NA	NA	Weeks03	18	464	33.8	4.8	BSk
insecta	Coleoptera	Melyridae	Listrus	sp.	NA	1	0	1	card	US_CA	Riverside	33.953	-117.47	NA	NA	Weeks03	18	464	33.8	4.8	BSk
insecta	Coleoptera	Melyridae	Listrus	sp.	NA	1	0	1	wolb	US_CA	Riverside	33.953	-117.47	NA	NA	Weeks03	18	464	33.8	4.8	BSk
insecta	Coleoptera	Melyridae	Listrus	sp.	NA	1	0	1	wolb	US_CA	Riverside	33.953	-117.47	NA	NA	Weeks03	18	464	33.8	4.8	BSk
insecta	Coleoptera	Melyridae	Zigia	versicolor	NA	1	0	1	card	NA	NA	NA	NA	NA	NA	ZchoriFein04	NA	NA	NA	NA	NA
insecta	Coleoptera	Melyridae	Zigia	versicolor	NA	1	0	1	wolb	NA	NA	NA	NA	NA	NA	ZchoriFein04	NA	NA	NA	NA	NA
insecta	Coleoptera	Micromalthidae	Micromalthus	debilis	NA	62	3	1	wolb	US_MI	near_Madison	43.196	-90.2392	2002-2006	NA	Perotti16	7.5	1069	28.6	-15	Dfa
insecta	Coleoptera	Mordellidae	Mordellistena	sp.	NA	12	0	1	card	France	MontBarri	43.6	3.20994	2004	NA	Duron08	12.8	575.8	27.5	0.9	Csb
insecta	Coleoptera	Mordellidae	Mordellistena	sp.	NA	12	0	1	wolb	France	MontBarri	43.6	3.20994	2004	NA	Duron08	12.8	575.8	27.5	0.9	Csb
insecta	Coleoptera	Nitidulidae	Carpophilus	pilosellus	NA	1	0	1	wolb	Japan	Fukushima	37.7859	140.26	NA	NA	Kageyama10	6.8	877	24.2	-8.9	Dfb
insecta	Coleoptera	Nitidulidae	Carpophilus	sp.	NA	1	0	1	wolb	US_IN	WoodnrBloomington	39.1667	-86.4833	1994-1998	Aug-Nov	Werren00	11.5	904.9	29.9	-7.1	Cfa
insecta	Coleoptera	Nitidulidae	Haptoncus	sp.	NA	10	0	1	wolb	Thailand	Sai_Yok	14.0167	98.6836	1999-2001	NA	Sintupachee06	22.5	123.3	30.8	13.8	Am
insecta	Coleoptera	Nitidulidae	Lobiopa	sp.	NA	1	0	1	wolb	US_IN	WoodnrBloomington	39.1667	-86.4833	1994-1998	Aug-Nov	Werren00	11.5	904.9	29.9	-7.1	Cfa
insecta	Coleoptera	Nitidulidae	Unid.	sp.	NA	1	0	1	wolb	Brazil	approx	-22.9799	-49.403	NA	NA	deOliveira15	20	241.2	28.8	9.3	Cfa
insecta	Coleoptera	Oedemeridae	Oncocerna	sp.	NA	20	0	1	card	France	MontBarri	43.6	3.20994	2004	NA	Duron08	12.8	575.8	27.5	0.9	Csb
insecta	Coleoptera	Oedemeridae	Oncocerna	sp.	NA	20	0	1	wolb	France	MontBarri	43.6	3.20994	2004	NA	Duron08	12.8	575.8	27.5	0.9	Csb
insecta	Coleoptera	Passalidae	Passalus	punctiger	NA	1	0	1	wolb	Panama	BarroColoradoIsland_Gamboa_PanamaCity_CerroCampana	9	-79.7	1993-1994	Aug-Nov	Werren95	26.5	57	31.9	22	Am
insecta	Coleoptera	Passalidae	Unid.	sp.	NA	1	0	1	wolb	Brazil	approx	-22.9799	-49.403	NA	NA	deOliveira15	20	241.2	28.8	9.3	Cfa
insecta	Coleoptera	Pleocomidae	Pleocoma	dubitalis	NA	1	0	1	card	US_CA	Riverside	33.953	-117.47	NA	NA	Weeks03	18	464	33.8	4.8	BSk
insecta	Coleoptera	Pleocomidae	Pleocoma	dubitalis	NA	1	0	1	wolb	US_CA	Riverside	33.953	-117.47	NA	NA	Weeks03	18	464	33.8	4.8	BSk
insecta	Coleoptera	Ptinidae	Unid.	sp.	NA	1	0	1	card	South_Korea	Sangju	36.4126	128.152	2007	Apr-Jun	Jeong09	12.2	940.2	29.9	-6.9	Cwa
insecta	Coleoptera	Ptinidae	Unid.	sp.	NA	1	0	1	wolb	South_Korea	Sangju	36.4126	128.152	2007	Apr-Jun	Jeong09	12.2	940.2	29.9	-6.9	Cwa
insecta	Coleoptera	Scarabaeidae	Acoma	glabrata	NA	1	0	1	card	US_CA	Riverside	33.953	-117.47	NA	NA	Weeks03	18	464	33.8	4.8	BSk
insecta	Coleoptera	Scarabaeidae	Acoma	glabrata	NA	1	0	1	wolb	US_CA	Riverside	33.953	-117.47	NA	NA	Weeks03	18	464	33.8	4.8	BSk
insecta	Coleoptera	Scarabaeidae	Adoretus	sp.	NA	4	0	1	wolb	Thailand	approx	14.0167	99.0533	1997-2000	Jun-Oct	Kittayapong03	26.2	158.7	35.1	16.8	Aw
insecta	Coleoptera	Scarabaeidae	Anomala	humeralis	NA	3	0	1	wolb	Thailand	approx	14.0167	99.0533	1997-2000	Jun-Oct	Kittayapong03	26.2	158.7	35.1	16.8	Aw
insecta	Coleoptera	Scarabaeidae	Anomala	marginata	NA	1	0	1	card	US_CA	Riverside	33.953	-117.47	NA	NA	Weeks03	18	464	33.8	4.8	BSk
insecta	Coleoptera	Scarabaeidae	Anomala	marginata	NA	1	0	1	wolb	US_CA	Riverside	33.953	-117.47	NA	NA	Weeks03	18	464	33.8	4.8	BSk
insecta	Coleoptera	Scarabaeidae	Canthidium	auritex	NA	1	0	1	wolb	Panama	BarroColoradoIsland_Gamboa_PanamaCity_CerroCampana	9	-79.7	1993-1994	Aug-Nov	Werren95	26.5	57	31.9	22	Am
insecta	Coleoptera	Scarabaeidae	Canthidium	haroldi	NA	2	0	1	wolb	Panama	BarroColoradoIsland_Gamboa_PanamaCity_CerroCampana	9	-79.7	1993-1994	Aug-Nov	Werren95	26.5	57	31.9	22	Am
insecta	Coleoptera	Scarabaeidae	Canthon	angustatus	NA	1	0	1	wolb	Panama	BarroColoradoIsland_Gamboa_PanamaCity_CerroCampana	9	-79.7	1993-1994	Aug-Nov	Werren95	26.5	57	31.9	22	Am
insecta	Coleoptera	Scarabaeidae	Canthon	sp.	NA	1	0	1	wolb	Panama	BarroColoradoIsland_Gamboa_PanamaCity_CerroCampana	9	-79.7	1993-1994	Aug-Nov	Werren95	26.5	57	31.9	22	Am
insecta	Coleoptera	Scarabaeidae	Cetonia	aurata	NA	12	0	1	card	France	MontBarri	43.6	3.20994	2004	NA	Duron08	12.8	575.8	27.5	0.9	Csb
insecta	Coleoptera	Scarabaeidae	Cetonia	aurata	NA	12	0	1	wolb	France	MontBarri	43.6	3.20994	2004	NA	Duron08	12.8	575.8	27.5	0.9	Csb
insecta	Coleoptera	Scarabaeidae	Cetonia	aurata	NA	3	0	1	card	France	Feurs	45.75	4.21373	2006	NA	Duron08	10.8	614.8	25.8	-1.1	Cfb
insecta	Coleoptera	Scarabaeidae	Cetonia	aurata	NA	3	0	1	wolb	France	Feurs	45.75	4.21373	2006	NA	Duron08	10.8	614.8	25.8	-1.1	Cfb
insecta	Coleoptera	Scarabaeidae	Cyclocephala	corbonarius	NA	1	0	1	wolb	Panama	BarroColoradoIsland_Gamboa_PanamaCity_CerroCampana	9	-79.7	1993-1994	Aug-Nov	Werren95	26.5	57	31.9	22	Am
insecta	Coleoptera	Scarabaeidae	Cyclocephala	sp.	NA	1	0	1	wolb	Panama	BarroColoradoIsland_Gamboa_PanamaCity_CerroCampana	9	-79.7	1993-1994	Aug-Nov	Werren95	26.5	57	31.9	22	Am
insecta	Coleoptera	Scarabaeidae	Cyclocephala	sp.	NA	1	0	1	wolb	Panama	BarroColoradoIsland_Gamboa_PanamaCity_CerroCampana	9	-79.7	1993-1994	Aug-Nov	Werren95	26.5	57	31.9	22	Am
insecta	Coleoptera	Scarabaeidae	Diplotaxis	sp.	NA	1	0	1	card	US_CA	Riverside	33.953	-117.47	NA	NA	Weeks03	18	464	33.8	4.8	BSk
insecta	Coleoptera	Scarabaeidae	Diplotaxis	sp.	NA	1	0	1	wolb	US_CA	Riverside	33.953	-117.47	NA	NA	Weeks03	18	464	33.8	4.8	BSk
insecta	Coleoptera	Scarabaeidae	Diplotaxis	sp.	NA	1	0	1	wolb	Panama	BarroColoradoIsland_Gamboa_PanamaCity_CerroCampana	9	-79.7	1993-1994	Aug-Nov	Werren95	26.5	57	31.9	22	Am
insecta	Coleoptera	Scarabaeidae	Ligyrus	ruginasus	NA	1	0	1	card	US_CA	Riverside	33.953	-117.47	NA	NA	Weeks03	18	464	33.8	4.8	BSk
insecta	Coleoptera	Scarabaeidae	Ligyrus	ruginasus	NA	1	0	1	wolb	US_CA	Riverside	33.953	-117.47	NA	NA	Weeks03	18	464	33.8	4.8	BSk
insecta	Coleoptera	Scarabaeidae	Onthophagus	acuminatus	NA	1	0	1	wolb	Panama	BarroColoradoIsland_Gamboa_PanamaCity_CerroCampana	9	-79.7	1993-1994	Aug-Nov	Werren95	26.5	57	31.9	22	Am
insecta	Coleoptera	Scarabaeidae	Onthophagus	vaulongeri	NA	6	1	1	wolb	Thailand	Sai_Yok	14.0167	98.6836	1999-2001	NA	Sintupachee06	22.5	123.3	30.8	13.8	Am
insecta	Coleoptera	Scarabaeidae	Parathyce	palpalis	NA	1	0	1	card	US_CA	Riverside	33.953	-117.47	NA	NA	Weeks03	18	464	33.8	4.8	BSk
insecta	Coleoptera	Scarabaeidae	Parathyce	palpalis	NA	1	0	1	wolb	US_CA	Riverside	33.953	-117.47	NA	NA	Weeks03	18	464	33.8	4.8	BSk
insecta	Coleoptera	Scarabaeidae	Phyllophaga	sp.	NA	1	0	1	wolb	US_IN	WoodnrBloomington	39.1667	-86.4833	1994-1998	Aug-Nov	Werren00	11.5	904.9	29.9	-7.1	Cfa
insecta	Coleoptera	Scarabaeidae	Popillia	japonica	NA	1	0	1	card	US_CA	Riverside	33.953	-117.47	NA	NA	Weeks03	18	464	33.8	4.8	BSk
insecta	Coleoptera	Scarabaeidae	Popillia	japonica	NA	1	0	1	wolb	US_CA	Riverside	33.953	-117.47	NA	NA	Weeks03	18	464	33.8	4.8	BSk
insecta	Coleoptera	Scarabaeidae	Scarabaeus	sp.	NA	1	0	1	card	US_CA	Riverside	33.953	-117.47	NA	NA	Weeks03	18	464	33.8	4.8	BSk
insecta	Coleoptera	Scarabaeidae	Scarabaeus	sp.	NA	1	0	1	wolb	US_CA	Riverside	33.953	-117.47	NA	NA	Weeks03	18	464	33.8	4.8	BSk
insecta	Coleoptera	Scarabaeidae	Serica	sp.	NA	1	0	1	card	US_CA	Riverside	33.953	-117.47	NA	NA	Weeks03	18	464	33.8	4.8	BSk
insecta	Coleoptera	Scarabaeidae	Serica	sp.	NA	1	0	1	wolb	US_CA	Riverside	33.953	-117.47	NA	NA	Weeks03	18	464	33.8	4.8	BSk
insecta	Coleoptera	Scarabaeidae	Unid.	sp.	NA	1	0	1	wolb	Brazil	approx	-22.9799	-49.403	NA	NA	deOliveira15	20	241.2	28.8	9.3	Cfa
insecta	Coleoptera	Scolytidae	Coccotrypes	dectyliperda	NA	1	1	1	wolb	NA	NA	NA	NA	NA	NA	ZchoriFein04	NA	NA	NA	NA	NA
insecta	Coleoptera	Scolytidae	Coccotrypes	dectyliperda	NA	1	0	1	card	NA	NA	NA	NA	NA	NA	ZchoriFein04	NA	NA	NA	NA	NA
insecta	Coleoptera	Scraptiidae	Anaspis	frontalis	NA	12	0	1	card	France	Feurs	45.75	4.21373	2006	NA	Duron08	10.8	614.8	25.8	-1.1	Cfb
insecta	Coleoptera	Scraptiidae	Anaspis	frontalis	NA	12	0	1	wolb	France	Feurs	45.75	4.21373	2006	NA	Duron08	10.8	614.8	25.8	-1.1	Cfb
insecta	Coleoptera	Silphidae	Nicrophorus	sp.	NA	1	0	1	card	US_CA	Riverside	33.953	-117.47	NA	NA	Weeks03	18	464	33.8	4.8	BSk
insecta	Coleoptera	Silphidae	Nicrophorus	sp.	NA	1	0	1	wolb	US_CA	Riverside	33.953	-117.47	NA	NA	Weeks03	18	464	33.8	4.8	BSk
insecta	Coleoptera	Silvanidae	Oryzaephilus	surinamensis	NA	1	1	1	wolb	Japan	Tsukuba	36.0855	140.014	NA	NA	Kageyama10	14	797.4	30.3	-3.3	Cfa
insecta	Coleoptera	Staphylinidae	Paederus	fuscipes	NA	17	0	1	wolb	Thailand	approx	14.0167	99.0533	1997-2000	Jun-Oct	Kittayapong03	26.2	158.7	35.1	16.8	Aw
insecta	Coleoptera	Staphylinidae	Paederus	fuscipes	NA	7	1	1	wolb	China_Hubei	Huazhong_Agricultural_University_Wuhan_Hubei_Province	30.4719	114.351	2007-2008	Nov-Oct	Yun11	17.2	890.3	33.6	0.5	Cfa
insecta	Coleoptera	Staphylinidae	Paederus	sp.	NA	4	0	1	wolb	Thailand	approx	14.0167	99.0533	1997-2000	Jun-Oct	Kittayapong03	26.2	158.7	35.1	16.8	Aw
insecta	Coleoptera	Staphylinidae	Paederus	tamulus	NA	2	0	1	wolb	Thailand	approx	14.0167	99.0533	1997-2000	Jun-Oct	Kittayapong03	26.2	158.7	35.1	16.8	Aw
insecta	Coleoptera	Staphylinidae	Unid.	sp.	NA	2	0	1	wolb	Thailand	Sai_Yok	14.0167	98.6836	1999-2001	NA	Sintupachee06	22.5	123.3	30.8	13.8	Am
insecta	Coleoptera	Staphylinidae	Unid.	sp.	NA	1	0	1	card	US_CA	Riverside	33.953	-117.47	NA	NA	Weeks03	18	464	33.8	4.8	BSk
insecta	Coleoptera	Staphylinidae	Unid.	sp.	NA	1	0	1	card	US_CA	Riverside	33.953	-117.47	NA	NA	Weeks03	18	464	33.8	4.8	BSk
insecta	Coleoptera	Staphylinidae	Unid.	sp.	NA	1	0	1	wolb	US_CA	Riverside	33.953	-117.47	NA	NA	Weeks03	18	464	33.8	4.8	BSk
insecta	Coleoptera	Staphylinidae	Unid.	sp.	NA	1	0	1	wolb	US_CA	Riverside	33.953	-117.47	NA	NA	Weeks03	18	464	33.8	4.8	BSk
insecta	Coleoptera	Staphylinidae	Unid.	sp.	NA	1	0	1	wolb	US_IN	WoodnrBloomington	39.1667	-86.4833	1994-1998	Aug-Nov	Werren00	11.5	904.9	29.9	-7.1	Cfa
insecta	Coleoptera	Staphylinidae	Unid.	sp.	NA	1	1	1	wolb	US_IN	WoodnrBloomington	39.1667	-86.4833	1994-1998	Aug-Nov	Werren00	11.5	904.9	29.9	-7.1	Cfa
insecta	Coleoptera	Tenebrionidae	Bolitotherus	cornutus	NA	1	0	1	wolb	US_IN	WoodnrBloomington	39.1667	-86.4833	1994-1998	Aug-Nov	Werren00	11.5	904.9	29.9	-7.1	Cfa
insecta	Coleoptera	Tenebrionidae	Cryptoglossa	sp.	NA	1	0	1	card	US_CA	Riverside	33.953	-117.47	NA	NA	Weeks03	18	464	33.8	4.8	BSk
insecta	Coleoptera	Tenebrionidae	Cryptoglossa	sp.	NA	1	0	1	wolb	US_CA	Riverside	33.953	-117.47	NA	NA	Weeks03	18	464	33.8	4.8	BSk
insecta	Coleoptera	Tenebrionidae	Gnathocerus	cornutus	NA	1	0	1	wolb	Japan	Okayama	34.7162	133.791	NA	NA	Kageyama10	13.8	828.4	30.6	-1.6	Cfa
insecta	Coleoptera	Tenebrionidae	Tenebrio	molitor	NA	12	0	1	card	UK	approx	51.6517	-0.242041	2006	NA	Duron08	9.9	485.9	21.9	0.5	Cfb
insecta	Coleoptera	Tenebrionidae	Tenebrio	molitor	NA	12	0	1	wolb	UK	approx	51.6517	-0.242041	2006	NA	Duron08	9.9	485.9	21.9	0.5	Cfb
insecta	Coleoptera	Tenebrionidae	Tenebrio	molitor	NA	1	0	1	card	NA	NA	NA	NA	NA	NA	ZchoriFein04	NA	NA	NA	NA	NA
insecta	Coleoptera	Tenebrionidae	Tenebrio	molitor	NA	1	0	1	wolb	NA	NA	NA	NA	NA	NA	ZchoriFein04	NA	NA	NA	NA	NA
insecta	Coleoptera	Tenebrionidae	Tribolium	castaneum	NA	1	0	1	wolb	Canada	approx	49.5	-125.5	NA	NA	Kageyama10	3.4	434.5	15.3	-4.9	Dfc
insecta	Coleoptera	Tenebrionidae	Tribolium	castaneum	NA	1	0	1	wolb	Japan	Chiba	35.6071	140.091	NA	NA	Kageyama10	15.3	732.3	30	0.7	Cfa
insecta	Coleoptera	Tenebrionidae	Tribolium	castaneum	NA	1	0	1	wolb	Japan	Okayama	34.7162	133.791	NA	NA	Kageyama10	13.8	828.4	30.6	-1.6	Cfa
insecta	Coleoptera	Tenebrionidae	Tribolium	castaneum	NA	1	0	1	wolb	Japan	Okinawa	26.2097	127.779	NA	NA	Kageyama10	22.7	443	31.3	13.5	Cfa
insecta	Coleoptera	Tenebrionidae	Tribolium	castaneum	NA	1	0	1	wolb	Japan	Tsukuba	36.0855	140.014	NA	NA	Kageyama10	14	797.4	30.3	-3.3	Cfa
insecta	Coleoptera	Tenebrionidae	Tribolium	castaneum	NA	1	0	1	wolb	Japan	Urawa	35.8622	139.616	NA	NA	Kageyama10	15	769.8	30.8	-0.7	Cfa
insecta	Coleoptera	Tenebrionidae	Tribolium	castaneum	NA	1	0	1	wolb	Thailand	approx	14.0167	99.0533	NA	NA	Kageyama10	26.2	158.7	35.1	16.8	Aw
insecta	Coleoptera	Tenebrionidae	Tribolium	castaneum	NA	1	0	1	card	NA	NA	NA	NA	NA	NA	ZchoriFein04	NA	NA	NA	NA	NA
insecta	Coleoptera	Tenebrionidae	Tribolium	castaneum	NA	1	0	1	wolb	NA	NA	NA	NA	NA	NA	ZchoriFein04	NA	NA	NA	NA	NA
insecta	Coleoptera	Tenebrionidae	Tribolium	freemani	NA	1	0	1	wolb	Brazil	approx	-22.9799	-49.403	NA	NA	Kageyama10	20	241.2	28.8	9.3	Cfa
insecta	Coleoptera	Tenebrionidae	Unid.	sp.	NA	1	0	1	wolb	Brazil	approx	-22.9799	-49.403	NA	NA	deOliveira15	20	241.2	28.8	9.3	Cfa
insecta	Coleoptera	Trogidae	Omorgus	suberosus	NA	1	0	1	card	US_CA	Riverside	33.953	-117.47	NA	NA	Weeks03	18	464	33.8	4.8	BSk
insecta	Coleoptera	Trogidae	Omorgus	suberosus	NA	1	0	1	wolb	US_CA	Riverside	33.953	-117.47	NA	NA	Weeks03	18	464	33.8	4.8	BSk
insecta	Coleoptera	Trogossitidae	Temnochila	sp.	NA	1	0	1	wolb	Panama	BarroColoradoIsland_Gamboa_PanamaCity_CerroCampana	9	-79.7	1993-1994	Aug-Nov	Werren95	26.5	57	31.9	22	Am
insecta	Coleoptera	Trogossitidae	Tenebroides	mauritanicus	NA	1	0	1	wolb	Japan	Tsukuba	36.0855	140.014	NA	NA	Kageyama10	14	797.4	30.3	-3.3	Cfa
insecta	Dermaptera	Carcinophoridae	Euborellia	philippinensis	NA	1	0	1	wolb	Thailand	approx	14.0167	99.0533	1997-2000	Jun-Oct	Kittayapong03	26.2	158.7	35.1	16.8	Aw
insecta	Dermaptera	Forficulidae	Forficula	auricularia	NA	16	0	1	card	France	Feurs	45.75	4.21373	2006	NA	Duron08	10.8	614.8	25.8	-1.1	Cfb
insecta	Dermaptera	Forficulidae	Forficula	auricularia	NA	16	0	1	wolb	France	Feurs	45.75	4.21373	2006	NA	Duron08	10.8	614.8	25.8	-1.1	Cfb
insecta	Diptera	Agromyzidae	Agromyza	oryzae	NA	2	2	1	wolb	Thailand	approx	14.0167	99.0533	1997-2000	Jun-Oct	Kittayapong03	26.2	158.7	35.1	16.8	Aw
insecta	Diptera	Agromyzidae	Agromyza	sp.	NA	3	0	1	wolb	Thailand	Sai_Yok	14.0167	98.6836	1999-2001	NA	Sintupachee06	22.5	123.3	30.8	13.8	Am
insecta	Diptera	Agromyzidae	Melanagromyza	sp.	NA	2	2	1	wolb	Thailand	Sai_Yok	14.0167	98.6836	1999-2001	NA	Sintupachee06	22.5	123.3	30.8	13.8	Am
insecta	Diptera	Agromyzidae	Unid.	sp.	NA	1	0	1	wolb	Thailand	Sai_Yok	14.0167	98.6836	1999-2001	NA	Sintupachee06	22.5	123.3	30.8	13.8	Am
insecta	Diptera	Culicidae	Anopheles	pharoensis	NA	3	1	25	wolb	Egypt	El-Nikhila	30.066	31.234	NA	NA	Dyab16	21.1	514	34.7	6.9	BWh
insecta	Diptera	Culicidae	Anopheles	pharoensis	NA	2	1	25	wolb	Egypt	Dairout	27.5503	30.799	NA	NA	Dyab16	21.2	544.1	35.6	3.6	BWh
insecta	Diptera	Culicidae	Anopheles	pharoensis	NA	2	0	25	wolb	Egypt	Sahel_Seleem	27.0514	31.3178	NA	NA	Dyab16	22.8	597.8	37.5	6	BWh
insecta	Diptera	Culicidae	Anopheles	pharoensis	NA	1	0	25	wolb	Egypt	El-Matiaa	28.4316	30.6519	NA	NA	Dyab16	21.2	578.8	36.6	3.9	BWh
insecta	Diptera	Anthomyiidae	Delia	antiqua	NA	11	0	1	card	France	approx	43.8958	3.83906	NA	NA	Duron08	13	592.1	28	0.7	Csb
insecta	Diptera	Anthomyiidae	Delia	antiqua	NA	11	0	1	wolb	France	approx	43.8958	3.83906	NA	NA	Duron08	13	592.1	28	0.7	Csb
insecta	Diptera	Anthomyiidae	Delia	platura	NA	11	0	1	card	France	approx	43.8958	3.83906	NA	NA	Duron08	13	592.1	28	0.7	Csb
insecta	Diptera	Anthomyiidae	Delia	platura	NA	11	0	1	wolb	France	approx	43.8958	3.83906	NA	NA	Duron08	13	592.1	28	0.7	Csb
insecta	Diptera	Anthomyiidae	Delia	radicum	NA	10	0	1	card	France	approx	43.8958	3.83906	NA	NA	Duron08	13	592.1	28	0.7	Csb
insecta	Diptera	Anthomyiidae	Delia	radicum	NA	10	0	1	wolb	France	approx	43.8958	3.83906	NA	NA	Duron08	13	592.1	28	0.7	Csb
insecta	Diptera	Anthomyiidae	Lasiomma	seminitidum	NA	1	0	1	wolb	Denmark	Copenhagen	55.6747	12.4906	NA	NA	Martin12	8.5	618.5	21.1	-2	Cfb
insecta	Diptera	Anthomyiidae	Unid.	sp.	NA	1	0	1	wolb	Brazil	approx	-22.9799	-49.403	NA	NA	deOliveira15	20	241.2	28.8	9.3	Cfa
insecta	Diptera	Asilidae	Unid.	sp.	NA	1	0	1	wolb	US_IN	WoodnrBloomington	39.1667	-86.4833	1994-1998	Aug-Nov	Werren00	11.5	904.9	29.9	-7.1	Cfa
insecta	Diptera	Blephariceridae	Blepharicera	sp.	NA	1	0	1	card	US_CA	Riverside	33.953	-117.47	NA	NA	Weeks03	18	464	33.8	4.8	BSk
insecta	Diptera	Blephariceridae	Blepharicera	sp.	NA	1	0	1	wolb	US_CA	Riverside	33.953	-117.47	NA	NA	Weeks03	18	464	33.8	4.8	BSk
insecta	Diptera	Bombyliidae	Bombylius	sp.	NA	1	0	1	card	US_CA	Riverside	33.953	-117.47	NA	NA	Weeks03	18	464	33.8	4.8	BSk
insecta	Diptera	Bombyliidae	Bombylius	sp.	NA	1	1	1	wolb	US_CA	Riverside	33.953	-117.47	NA	NA	Weeks03	18	464	33.8	4.8	BSk
insecta	Diptera	Bombyliidae	Unid.	sp.	NA	1	0	1	wolb	US_IN	WoodnrBloomington	39.1667	-86.4833	1994-1998	Aug-Nov	Werren00	11.5	904.9	29.9	-7.1	Cfa
insecta	Diptera	Braulidae	Braula	coeca	NA	4	0	1	card	France	Ouessant	48.45	-5.10442	2002	NA	Duron08	11.3	348.7	19.8	4.2	Cfb
insecta	Diptera	Braulidae	Braula	coeca	NA	4	0	1	wolb	France	Ouessant	48.45	-5.10442	2002	NA	Duron08	11.3	348.7	19.8	4.2	Cfb
insecta	Diptera	Calliphoridae	Chrysomya	chani	NA	2	0	1	wolb	Thailand	Chiang_Mai	18.7719	98.8863	NA	NA	Mingchay14	24.6	246.6	35.1	11.8	Aw
insecta	Diptera	Calliphoridae	Chrysomya	chani	NA	2	0	1	wolb	Thailand	Phuket	7.8834	98.3744	NA	NA	Mingchay14	27.3	54.7	32.8	22.6	Am
insecta	Diptera	Calliphoridae	Chrysomya	megacephala	NA	2	1	1	wolb	Thailand	Prachuab_Khiri_Khan	11.8027	99.0281	NA	NA	Mingchay14	25.4	96.6	31.9	18.8	Am
insecta	Diptera	Calliphoridae	Chrysomya	megacephala	NA	2	0	1	wolb	Thailand	Ranong	9.95511	98.6126	NA	NA	Mingchay14	26.9	74.6	34.2	20.9	Am
insecta	Diptera	Calliphoridae	Chrysomya	megacephala	NA	2	0	1	wolb	Thailand	Satun	6.86598	99.9646	NA	NA	Mingchay14	27.2	60.1	33.6	21.5	Am
insecta	Diptera	Calliphoridae	Chrysomya	megacephala	NA	1	1	1	wolb	Thailand	Phuket	7.8834	98.3744	NA	NA	Mingchay14	27.3	54.7	32.8	22.6	Am
insecta	Diptera	Calliphoridae	Chrysomya	pinguis	NA	1	0	1	wolb	Thailand	Chiang_Mai	18.7719	98.8863	NA	NA	Mingchay14	24.6	246.6	35.1	11.8	Aw
insecta	Diptera	Calliphoridae	Dyscritomyia	sp.	NA	1	0	1	wolb	US_HI	Hawaii_Island	19.59	-155.714	NA	NA	Bennett12	13.1	117.2	19.5	6.8	Cfb
insecta	Diptera	Calliphoridae	Dyscritomyia	sp.	NA	1	0	1	wolb	US_HI	Hawaii_Island	19.59	-155.714	NA	NA	Bennett12	13.1	117.2	19.5	6.8	Cfb
insecta	Diptera	Calliphoridae	Dyscritomyia	sp.	NA	1	0	1	wolb	US_HI	Hawaii_Island	19.59	-155.714	NA	NA	Bennett12	13.1	117.2	19.5	6.8	Cfb
insecta	Diptera	Calliphoridae	Dyscritomyia	sp.	NA	1	1	1	wolb	US_HI	Hawaii_Island	19.59	-155.714	NA	NA	Bennett12	13.1	117.2	19.5	6.8	Cfb
insecta	Diptera	Calliphoridae	Hemipyrellia	ligurriens	NA	1	0	1	wolb	Thailand	Phuket	7.8834	98.3744	NA	NA	Mingchay14	27.3	54.7	32.8	22.6	Am
insecta	Diptera	Calliphoridae	Hemipyrellia	pulchra	NA	2	1	1	wolb	Thailand	Chiang_Mai	18.7719	98.8863	NA	NA	Mingchay14	24.6	246.6	35.1	11.8	Aw
insecta	Diptera	Calliphoridae	Hemipyrellia	pulchra	NA	1	0	1	wolb	Thailand	Phuket	7.8834	98.3744	NA	NA	Mingchay14	27.3	54.7	32.8	22.6	Am
insecta	Diptera	Calliphoridae	Lucilia	ciricata	NA	1	0	1	card	NA	NA	NA	NA	NA	NA	ZchoriFein04	NA	NA	NA	NA	NA
insecta	Diptera	Calliphoridae	Lucilia	ciricata	NA	1	0	1	wolb	NA	NA	NA	NA	NA	NA	ZchoriFein04	NA	NA	NA	NA	NA
insecta	Diptera	Calliphoridae	Lucilia	cuprina	NA	5	0	1	wolb	Thailand	Phuket	7.8834	98.3744	NA	NA	Mingchay14	27.3	54.7	32.8	22.6	Am
insecta	Diptera	Calliphoridae	Lucilia	porphyrina	NA	1	0	1	wolb	Thailand	Chiang_Mai	18.7719	98.8863	NA	NA	Mingchay14	24.6	246.6	35.1	11.8	Aw
insecta	Diptera	Calliphoridae	Protocalliphora	sp.	NA	12	0	1	card	France	Corsica	42.1803	8.48699	2003	NA	Duron08	NA	NA	NA	NA	Csb
insecta	Diptera	Calliphoridae	Protocalliphora	sp.	NA	12	12	1	wolb	France	Corsica	42.1803	8.48699	2003	NA	Duron08	NA	NA	NA	NA	Csb
insecta	Diptera	Calliphoridae	Unid.	sp.	NA	1	0	1	wolb	US_IN	WoodnrBloomington	39.1667	-86.4833	1994-1998	Aug-Nov	Werren00	11.5	904.9	29.9	-7.1	Cfa
insecta	Diptera	Cecidomyiidae	Asphondylia	capparis	NA	1	0	1	card	NA	NA	NA	NA	NA	NA	ZchoriFein04	NA	NA	NA	NA	NA
insecta	Diptera	Cecidomyiidae	Asphondylia	capparis	NA	1	0	1	wolb	NA	NA	NA	NA	NA	NA	ZchoriFein04	NA	NA	NA	NA	NA
insecta	Diptera	Cecidomyiidae	Dasineuriola	sp.	NA	1	0	1	card	NA	NA	NA	NA	NA	NA	ZchoriFein04	NA	NA	NA	NA	NA
insecta	Diptera	Cecidomyiidae	Dasineuriola	sp.	NA	1	0	1	wolb	NA	NA	NA	NA	NA	NA	ZchoriFein04	NA	NA	NA	NA	NA
insecta	Diptera	Cecidomyiidae	Orseolia	oryzae	NA	1	1	1	wolb	NA	NA	NA	NA	NA	NA	Behera01	NA	NA	NA	NA	NA
insecta	Diptera	Cecidomyiidae	Orseolia	oryzae	NA	38	7	1	wolb	Thailand	approx	14.0167	99.0533	1997-2000	Jun-Oct	Kittayapong03	26.2	158.7	35.1	16.8	Aw
insecta	Diptera	Cecidomyiidae	Schizomyia	sp.	NA	1	0	1	card	NA	NA	NA	NA	NA	NA	ZchoriFein04	NA	NA	NA	NA	NA
insecta	Diptera	Cecidomyiidae	Schizomyia	sp.	NA	1	0	1	wolb	NA	NA	NA	NA	NA	NA	ZchoriFein04	NA	NA	NA	NA	NA
insecta	Diptera	Cecidomyiidae	Unid.	sp.	NA	5	1	1	wolb	Brazil	approx	-22.9799	-49.403	NA	NA	deOliveira15	20	241.2	28.8	9.3	Cfa
insecta	Diptera	Celyphidae	Celyphus	scutatus	NA	3	0	1	wolb	Thailand	Sai_Yok	14.0167	98.6836	1999-2001	NA	Sintupachee06	22.5	123.3	30.8	13.8	Am
insecta	Diptera	Ceratopogonidae	Culicoides	achrayi	NA	6	0	1	card	UK	Bala	52.911	-3.60757	2012	Jul-Oct	Lewis14	8.3	446.1	18.3	-0.2	Cfb
insecta	Diptera	Ceratopogonidae	Culicoides	achrayi	NA	6	0	1	wolb	UK	Bala	52.911	-3.60757	2012	Jul-Oct	Lewis14	8.3	446.1	18.3	-0.2	Cfb
insecta	Diptera	Ceratopogonidae	Culicoides	actoni	NA	3	0	1	card	Japan	approx	36.0333	139.235	NA	NA	Nakamura09	13.3	809.4	30	-4.3	Cfa
insecta	Diptera	Ceratopogonidae	Culicoides	actoni	NA	3	0	1	wolb	Japan	approx	36.0333	139.235	NA	NA	Nakamura09	13.3	809.4	30	-4.3	Cfa
insecta	Diptera	Ceratopogonidae	Culicoides	arakawae	NA	16	16	1	card	Japan	approx	36.0333	139.235	NA	NA	Nakamura09	13.3	809.4	30	-4.3	Cfa
insecta	Diptera	Ceratopogonidae	Culicoides	arakawae	NA	16	0	1	wolb	Japan	approx	36.0333	139.235	NA	NA	Nakamura09	13.3	809.4	30	-4.3	Cfa
insecta	Diptera	Ceratopogonidae	Culicoides	aterinervis	NA	1	0	1	card	Japan	approx	36.0333	139.235	NA	NA	Nakamura09	13.3	809.4	30	-4.3	Cfa
insecta	Diptera	Ceratopogonidae	Culicoides	aterinervis	NA	1	0	1	wolb	Japan	approx	36.0333	139.235	NA	NA	Nakamura09	13.3	809.4	30	-4.3	Cfa
insecta	Diptera	Ceratopogonidae	Culicoides	brevipalpis	NA	2	0	1	card	Japan	approx	36.0333	139.235	NA	NA	Nakamura09	13.3	809.4	30	-4.3	Cfa
insecta	Diptera	Ceratopogonidae	Culicoides	brevipalpis	NA	2	0	1	wolb	Japan	approx	36.0333	139.235	NA	NA	Nakamura09	13.3	809.4	30	-4.3	Cfa
insecta	Diptera	Ceratopogonidae	Culicoides	brevitarsis	NA	4	0	1	card	Japan	approx	36.0333	139.235	NA	NA	Nakamura09	13.3	809.4	30	-4.3	Cfa
insecta	Diptera	Ceratopogonidae	Culicoides	brevitarsis	NA	4	0	1	wolb	Japan	approx	36.0333	139.235	NA	NA	Nakamura09	13.3	809.4	30	-4.3	Cfa
insecta	Diptera	Ceratopogonidae	Culicoides	charadraeus	NA	1	0	1	card	Japan	approx	36.0333	139.235	NA	NA	Nakamura09	13.3	809.4	30	-4.3	Cfa
insecta	Diptera	Ceratopogonidae	Culicoides	charadraeus	NA	1	0	1	wolb	Japan	approx	36.0333	139.235	NA	NA	Nakamura09	13.3	809.4	30	-4.3	Cfa
insecta	Diptera	Ceratopogonidae	Culicoides	chiopterus	NA	3	0	1	card	UK	Leahurst_University_of_Liverpool	53.291	-3.02994	2012	Jul-Oct	Lewis14	9.3	426.4	19.1	0.5	Cfb
insecta	Diptera	Ceratopogonidae	Culicoides	chiopterus	NA	3	0	1	wolb	UK	Leahurst_University_of_Liverpool	53.291	-3.02994	2012	Jul-Oct	Lewis14	9.3	426.4	19.1	0.5	Cfb
insecta	Diptera	Ceratopogonidae	Culicoides	chiopterus	NA	3	0	1	card	UK	LeahurstCampus_UniversityofLiverpool	53.2909	-3.02774	2012	Jul-Oct	Lewis14	9.3	426.4	19.1	0.5	Cfb
insecta	Diptera	Ceratopogonidae	Culicoides	chiopterus	NA	3	0	1	wolb	UK	LeahurstCampus_UniversityofLiverpool	53.2909	-3.02774	2012	Jul-Oct	Lewis14	9.3	426.4	19.1	0.5	Cfb
insecta	Diptera	Ceratopogonidae	Culicoides	circumscriptus	NA	1	0	1	card	NA	NA	NA	NA	NA	NA	ZchoriFein04	NA	NA	NA	NA	NA
insecta	Diptera	Ceratopogonidae	Culicoides	circumscriptus	NA	1	0	1	wolb	NA	NA	NA	NA	NA	NA	ZchoriFein04	NA	NA	NA	NA	NA
insecta	Diptera	Ceratopogonidae	Culicoides	cylindratus	NA	3	0	1	card	Japan	approx	36.0333	139.235	NA	NA	Nakamura09	13.3	809.4	30	-4.3	Cfa
insecta	Diptera	Ceratopogonidae	Culicoides	cylindratus	NA	3	0	1	wolb	Japan	approx	36.0333	139.235	NA	NA	Nakamura09	13.3	809.4	30	-4.3	Cfa
insecta	Diptera	Ceratopogonidae	Culicoides	dewul	NA	5	0	1	card	UK	LeahurstCampus_UniversityofLiverpool	53.2909	-3.02774	2012	Jul-Oct	Lewis14	9.3	426.4	19.1	0.5	Cfb
insecta	Diptera	Ceratopogonidae	Culicoides	dewul	NA	5	0	1	wolb	UK	LeahurstCampus_UniversityofLiverpool	53.2909	-3.02774	2012	Jul-Oct	Lewis14	9.3	426.4	19.1	0.5	Cfb
insecta	Diptera	Ceratopogonidae	Culicoides	dewulfi	NA	5	0	1	card	UK	Leahurst_University_of_Liverpool	53.291	-3.02994	2012	Jul-Oct	Lewis14	9.3	426.4	19.1	0.5	Cfb
insecta	Diptera	Ceratopogonidae	Culicoides	dewulfi	NA	5	0	1	wolb	UK	Leahurst_University_of_Liverpool	53.291	-3.02994	2012	Jul-Oct	Lewis14	9.3	426.4	19.1	0.5	Cfb
insecta	Diptera	Ceratopogonidae	Culicoides	dubius	NA	1	0	1	card	Japan	approx	36.0333	139.235	NA	NA	Nakamura09	13.3	809.4	30	-4.3	Cfa
insecta	Diptera	Ceratopogonidae	Culicoides	dubius	NA	1	0	1	wolb	Japan	approx	36.0333	139.235	NA	NA	Nakamura09	13.3	809.4	30	-4.3	Cfa
insecta	Diptera	Ceratopogonidae	Culicoides	erairai	NA	1	0	1	card	Japan	approx	36.0333	139.235	NA	NA	Nakamura09	13.3	809.4	30	-4.3	Cfa
insecta	Diptera	Ceratopogonidae	Culicoides	erairai	NA	1	0	1	wolb	Japan	approx	36.0333	139.235	NA	NA	Nakamura09	13.3	809.4	30	-4.3	Cfa
insecta	Diptera	Ceratopogonidae	Culicoides	humeralis	NA	3	0	1	card	Japan	approx	36.0333	139.235	NA	NA	Nakamura09	13.3	809.4	30	-4.3	Cfa
insecta	Diptera	Ceratopogonidae	Culicoides	humeralis	NA	3	0	1	wolb	Japan	approx	36.0333	139.235	NA	NA	Nakamura09	13.3	809.4	30	-4.3	Cfa
insecta	Diptera	Ceratopogonidae	Culicoides	imicola	NA	56	30	1	card	Israel	central_plain	32.721	35.41	2009-2010	Sep-Oct	Morag12	20.3	564.2	33.1	8.2	Csa
insecta	Diptera	Ceratopogonidae	Culicoides	imicola	NA	56	15	1	card	Israel	Negev_desert	30.8269	34.8736	2009-2010	Sep-Oct	Morag12	19.6	531	33.2	6.6	BSh
insecta	Diptera	Ceratopogonidae	Culicoides	imicola	NA	44	35	1	card	Israel	coastal_plain	32.721	35.41	2009-2010	Sep-Oct	Morag12	20.3	564.2	33.1	8.2	Csa
insecta	Diptera	Ceratopogonidae	Culicoides	imicola	NA	40	17	1	card	Israel	Jordan_valley	32.5403	35.4717	2009-2010	Sep-Oct	Morag12	21.7	597.9	35.6	8.5	Csa
insecta	Diptera	Ceratopogonidae	Culicoides	imicola	Natural	50	5	1	wolb	Spain	Almoraima__Andalucia	36.2882	-5.43164	2009-2012	NA	Pages17	17.4	406.5	28.2	8.2	Csa
insecta	Diptera	Ceratopogonidae	Culicoides	imicola	Natural	50	0	1	card	Spain	Almoraima__Andalucia	36.2882	-5.43164	2009-2012	NA	Pages17	17.4	406.5	28.2	8.2	Csa
insecta	Diptera	Ceratopogonidae	Culicoides	imicola	Natural	50	0	1	wolb	Spain	Juanar__Andalucia	36.5701	-4.8914	2009-2012	NA	Pages17	14.5	525	29.1	3.3	Csa
insecta	Diptera	Ceratopogonidae	Culicoides	imicola	Natural	50	0	1	card	Spain	Juanar__Andalucia	36.5701	-4.8914	2009-2012	NA	Pages17	14.5	525	29.1	3.3	Csa
insecta	Diptera	Ceratopogonidae	Culicoides	imicola	Livestock_premise	50	0	1	wolb	Spain	Pozo_Estancoa__Castilla_Mancha	38.9059	-4.31681	2009-2012	NA	Pages17	14.6	690.7	34.3	1	Csa
insecta	Diptera	Ceratopogonidae	Culicoides	imicola	Livestock_premise	50	0	1	card	Spain	Pozo_Estancoa__Castilla_Mancha	38.9059	-4.31681	2009-2012	NA	Pages17	14.6	690.7	34.3	1	Csa
[truncated: 9,052 more rows]

## Sheet: DB-refs
Abarca12	Abarca, K., Lopez, J., Acosta-Jamett, G., Lepe, P., Soares, J. F., & Labruna, M. B. (2012). A Third Amblyomma Species and the First Tick-Borne Rickettsia in Chile. JOURNAL OF MEDICAL ENTOMOLOGY, 49(1), 219–222. doi:10.1603/ME11147
Abramowicz11	Abramowicz, K. F., Rood, M. P., Krueger, L., & Eremeeva, M. E. (2011). Urban focus of Rickettsia typhi and Rickettsia felis in Los Angeles, California. Vector-Borne and Zoonotic Diseases, 11(7), 979–984.
Abramowicz12	Abramowicz, K. F., Wekesa, J. W., Nwadike, C. N., Zambrano, M. L., Karpathy, S. E., Cecil, D., … Eremeeva, M. E. (2012). Rickettsia felis in cat fleas, Ctenocephalides felis parasitizing opossums, San Bernardino County, California. MEDICAL AND VETERINARY ENTOMOLOGY, 26(4), 458–462. doi:10.1111/j.1365-2915.2012.01017.x
Ahmad17	Ahmad, N. A., Vythilingam, I., Lim, Y. A. L., Zabari, N. Z. A. M., & Lee, H. L. (2017). Detection of Wolbachia in Aedes albopictus and Their Effects on Chikungunya Virus. The American Journal of Tropical Medicine and Hygiene 96: 148-156.
Ahmed09	Ahmed, M. Z., Shatters, R. G., Ren, S.-X., Jin, G.-H., Mandour, N. S., & Qiu, B.-L. (2009). Genetic distinctions among the Mediterranean and Chinese populations of Bemisia tabaci Q biotype and their endosymbiont Wolbachia populations. JOURNAL OF APPLIED ENTOMOLOGY, 133(9-10), 733–741. doi:10.1111/j.1439-0418.2009.01442.x
Ahmed10	Ahmed, M. Z., Ren, S.-X., Mandour, N. S., Greeff, J. M., & Qiu, B.-L. (2010). Prevalence of Wolbachia Supergroups A and B in Bemisia tabaci (Hemiptera: Aleyrodidae) and Some of Its Natural Enemies. JOURNAL OF ECONOMIC ENTOMOLOGY, 103(5), 1848–1859. doi:10.1603/EC10033
Ahmed13	Ahmed, M. Z., Greyvenstein, O. F. C., Erasmus, C., Welch, J. J., & Greeff, J. M. (2013). Consistently high incidence of Wolbachia in global fig wasp communities. Ecological Entomology, 38(2), 147–154. doi:10.1111/een.12002
Ahrens05	Ahrens, M. E., & Shoemaker, D. (2005). Evolutionary history of Wolbachia infections in the fire ant Solenopsis invicta. BMC Evolutionary Biology, 5(1), 35. doi:10.1186/1471-2148-5-35
Akhoundi16	Akhoundi M, Cannet A, Loubatier C, Berenger JM, Izri A, Marty P, Delaunay P. (2016). Molecular characterization of Wolbachia infection in bed bugs (Cimex lectularius) collected from several localities in France. Parasite. 23:31. doi: 10.1051/parasite/2016031.
Alam12	Alam, U., Hyseni, C., Symula, R. E., Brelsfoard, C., Wu, Y., Kruglov, O., … Aksoy, S. (2012). Microfauna-host interactions: implications for trypanosome transmission dynamics in Glossina fuscipes fuscipes in Uganda. Applied and Environmental Microbiology. doi:10.1128/AEM.00806-12
Albuquerque11	Albuquerque, A. L., Magalhães, T., & Ayres, C. F. J. (2011). High prevalence and lack of diversity of Wolbachia pipientis in Aedes albopictus populations from Northeast Brazil. Memórias Do Instituto Oswaldo Cruz, 106(6), 773–776.
Almeida13	Almeida, R. F. C., Garcia, M. V., Cunha, R. C., Matias, J., Labruna, M. B., & Andreotti, R. (2013). The first report of Rickettsia spp. in Amblyomma nodosum in the State of Mato Grosso do Sul, Brazil. Ticks and Tick-Borne Diseases, 4(1–2), 156–159. doi:10.1016/j.ttbdis.2012.08.002
Almerao12	Almerão, M. P., Fagundes, N. J. R., Araújo, P. B., Verne, S., Grandjean, F., Bouchon, D., & Araújo, A. M. (2012). First record of Wolbachia in South American terrestrial isopods: prevalence and diversity in two species of Balloniscus (Crustacea, Oniscidea). Genetics and Molecular Biology, 35(4), 980–989.
Alves09	Alves, A. S., Milhano, N., Santos-Silva, M., Santos, A. S., Vilhena, M., & De Sousa, R. (2009). Evidence of Bartonella spp., Rickettsia spp. and Anaplasma phagocytophilum in domestic, shelter and stray cat blood and fleas, Portugal. Clinical Microbiology and Infection, 15, 1–3.
Amit17	Amit, L., Ben-Shlomo, R. & Chiel, E. (2017). Are microbial symbionts involved in the speciation of the gall-inducing aphid, Slavum wertheimae? Arthropod-Plant Interactions 1:10. doi:10.1007/s11829-017-9495-7
Ankola11	Ankola, K., Brueckner, D., & Puttaraju, H. P. (2011). Wolbachia endosymbiont infection in two Indian butterflies and female-biased sex ratio in the Red Pierrot, Talicada nyseus. Journal of Biosciences, 36(5), 845–850.
Arthofer09	Arthofer, W., Riegler, M., Schneider, D., Krammer, M., Miller, W. J., & Stauffer, C. (2009). Hidden Wolbachia diversity in field populations of the European cherry fruit fly, Rhagoletis cerasi (Diptera, Tephritidae). Molecular Ecology, 18(18), 3816–3830. doi:10.1111/j.1365-294X.2009.04321.x
Atyame11	Atyame, C. M., Duron, O., Tortosa, P., Pasteur, N., Fort, P., & Weill, M. (2011). Multiple Wolbachia determinants control the evolution of cytoplasmic incompatibilities in Culex pipiens mosquito populations. MOLECULAR ECOLOGY, 20(2), 286–298. doi:10.1111/j.1365-294X.2010.04937.x
Atyame15	Atyame CM, Labbé P, Rousset F, Beji M, Makoundou P, Duron O, Dumas E, Pasteur N, Bouattour A, Fort P, Weill M. (2015) Stable coexistence of incompatible Wolbachia along a narrow contact zone in mosquito field populations. Mol Ecol 24(2):508-21. doi: 10.1111/mec.13035.
Augustinos11	Augustinos, A. A., Santos-Garcia, D., Dionyssopoulou, E., Moreira, M., Papapanagiotou, A., Scarvelakis, M., … Borges, P. A. V. (2011). Detection and characterization of Wolbachia infections in natural populations of aphids: is the hidden diversity fully unraveled? PloS One, 6(12), e28695.
Augustinos14	Augustinos AA, Asimakopoulou AK, Moraiti CA, Mavragani-Tsipidou P, Papadopoulos NT, Bourtzis K. (2014). Microsatellite and Wolbachia analysis in Rhagoletis cerasi natural populations: population structuring and multiple infections. Ecol Evol. 4(10):1943-62. doi: 10.1002/ece3.553.
Avtzis14	Avtzis DN, Doudoumis V, Bourtzis K. (2014). Wolbachia infections and mitochondrial diversity of two chestnut feeding Cydia species. PLoS One. 9(11):e112795. doi: 10.1371/journal.pone.0112795.
Azpurua10	Azpurua, J., De La Cruz, D., Valderama, A., & Windsor, D. (2010). Lutzomyia Sand Fly Diversity and Rates of Infection by Wolbachia and an Exotic Leishmania Species on Barro Colorado Island, Panama. PLoS Negl Trop Dis, 4(3), e627. doi:10.1371/journal.pntd.0000627
Baldini14	Baldini F, Segata N, Pompon J, Marcenac P, Shaw WR, Dabiré RK, Diabaté A, Levashina EA, Catteruccia F. (2014). Evidence of natural Wolbachia infections in field populations of Anopheles gambiae. Nat Commun. 5:3985. doi: 10.1038/ncomms4985.
Baldo07	Baldo, L., Prendini, L., Corthals, A., & Werren, J. H. (2007). Wolbachia Are Present in Southern African Scorpions and Cluster with Supergroup F. Current Microbiology, 55(5), 367–373. doi:10.1007/s00284-007-9009-4
Baldo08	Baldo, L., Ayoub, N. A., Hayashi, C. Y., Russell, J. A., Stahlhut, J. K., & Werren, J. H. (2008). Insight into the routes of Wolbachia invasion: high levels of horizontal transfer in the spider genus Agelenopsis revealed by Wolbachia strain and mitochondrial DNA diversity. Molecular Ecology, 17(2), 557–569. doi:10.1111/j.1365-294X.2007.03608.x
Baldridge09	Baldridge, G. D., Scoles, G. A., Burkhardt, N. Y., Schloeder, B., Kurtti, T. J., & Munderloh, U. G. (2009). Transovarial Transmission of Francisella-Like Endosymbionts and Anaplasma phagocytophilum Variants in Dermacentor albipictus (Acari: Ixodidae). JOURNAL OF MEDICAL ENTOMOLOGY, 46(3), 625–632. doi:10.1603/033.046.0330
Bansal14	Bansal R, Mian MA, Michel AP. (2014). Microbiome diversity of Aphis glycines with extensive superinfection in native and invasive populations. Environ Microbiol Rep. 6(1):57-69. doi: 10.1111/1758-2229.12108.
Barbara10	Barbara, K. A., Farzeli, A., Ibrahim, I. N., Antonjaya, U., Yunianto, A., Winoto, I., … Blair. (2010). Rickettsial Infections of Fleas Collected From Small Mammals on Four Islands in Indonesia. JOURNAL OF MEDICAL ENTOMOLOGY, 47(6), 1173–1178. doi:10.1603/ME10064
Behera01	Behera, L., Sahu, S. C., Rajamani, S., & Mohan, M. (2001). Molecular evidence for Wolbachia in rice insects. Current Science, 81(10), 1299–1300.
Beninati02	Beninati, T., Lo, N., Noda, H., Esposito, F., Rizzoli, A., Favia, G., & Genchi, C. (2002). First Detection of Spotted Fever Group Rickettsiae in Ixodes ricinus from Italy. Emerging Infectious Diseases, 8(9), 983–986. doi:10.3201/eid0809.020060
Benlarbi03	Benlarbi, M., & Ready, P. d. (2003). Host-specific Wolbachia strains in widespread populations of Phlebotomus perniciosus and P. papatasi (Diptera: Psychodidae), and prospects for driving genes into these vectors of Leishmania. Bulletin of Entomological Research, 93(05), 383–391. doi:10.1079/BER2003251
Bennett12	Bennett, G. M., Pantoja, N. A., & O’Grady, P. M. (2012). Diversity and phylogenetic relationships of wolbachia in drosophila and other native hawaiian insects. Fly, 6(4). Retrieved from http://www.scopus.com/inward/record.url?eid=2-s2.0-84867763116&partnerID=40&md5=12bad3a8a7b3a91b6cb7685e9940513a
Bergman15	Bergman CM, Haddrill PR. (2015) Strain-specific and pooled genome sequences for populations of Drosophila melanogaster from three continents. F1000Res 4:31. doi: 10.12688/f1000research.6090.1.
Bermudez11	Bermúdez, C. S. E., Zaldívar, A. Y., Spolidorio, M. G., Moraes-Filho, J., Miranda, R. J., Caballero, C. M., … Labruna, M. B. (2011). Rickettsial infection in domestic mammals and their ectoparasites in El Valle de Antón, Coclé, Panamá. Veterinary Parasitology, 177(1–2), 134–138. doi:10.1016/j.vetpar.2010.11.020
Berrelha09	Berrelha, J., Briolant, S., Muller, F., Rolain, J. M., Marie, J. L., Pagés, F., … Parola, P. (2009). Rickettsia felis and Rickettsia massiliae in Ivory Coast, Africa. Clinical Microbiology and Infection, 15, 251–252.
Bing13	Bing XL, Ruan YM, Rao Q, Wang XW, Liu SS. (2013). Diversity of secondary endosymbionts among different putative species of the whitefly Bemisia tabaci. Insect Sci. 20:194-206. doi:10.1111/j.1744-7917.2012.01522.x.
Bing14	Bing, X.-L., Xia, W.-Q., Gui, J.-D., Yan, G.-H., Wang, X.-W., & Liu S.-S. (2014). Diversity and evolution of the Wolbachia endosymbionts of Bemisia (Hemiptera: Aleyrodidae) whiteflies. Ecology and Evolution 4(13): 2714– 2737. doi: 10.1002/ece3.1126
Bing14	Bing XL, Xia WQ, Gui JD, Yan GH, Wang XW, Liu SS. (2014). Diversity and evolution of the Wolbachia endosymbionts of Bemisia (Hemiptera: Aleyrodidae) whiteflies. Ecol Evol. 4(13):2714-37. doi: 10.1002/ece3.1126.
Bitam06	Bitam, I., Parola, P., De La Cruz, K. D., Matsumoto, K., Baziz, B., Rolain, J.-M., … Raoult, D. (2006). First molecular detection of Rickettsia felis in fleas from Algeria. The American Journal of Tropical Medicine and Hygiene, 74(4), 532–535.
Bitam09a	Bitam, I., Baziz, B., Kernif, T., Harrat, Z., Parola, P., & Raoult, D. (2009). Molecular detection of Rickettsia typhi and Rickettsia felis in fleas from Algeria. Clinical Microbiology and Infection, 15, 255–256.
Bitam09b	Bitam, I., Kernif, T., Harrat, Z., Parola, P., & Raoult, D. (2009). First detection of Rickettsia aeschlimannii in Hyalomma aegyptium from Algeria. Clinical Microbiology and Infection: The Official Publication of the European Society of Clinical Microbiology and Infectious Diseases, 15 Suppl 2, 253–254. doi:10.1111/j.1469-0691.2008.02274.x
Blair04	Blair, P. J., Jiang, J., Schoeler, G. B., Moron, C., Anaya, E., Cespedes, M., … Olson, J. G. (2004). Characterization of Spotted Fever Group Rickettsiae in Flea and Tick Specimens from Northern Peru. Journal of Clinical Microbiology, 42(11), 4961–4967. doi:10.1128/JCM.42.11.4961-4967.2004
Blanco06	Blanco, J. R., Pérez-Martínez, L., Vallejo, M., Santibáñez, S., Portillo, A., & Oteo, J. A. (2006). Prevalence of rickettsia felis-like and Bartonella Spp. in Ctenocephalides felis and Ctenocephalides canis from La Rioja (Northern Spain). Annals of the New York Academy of Sciences, 1078, 270–274. doi:10.1196/annals.1374.050
Blaschitz08	Blaschitz, M., Narodoslavsky-Gföller, M., Kanzler, M., Walochnik, J., & Stanek, G. (2008). First detection of Rickettsia helvetica in Ixodes ricinus ticks in Austria. Vector Borne and Zoonotic Diseases (Larchmont, N.Y.), 8(4), 561–563. doi:10.1089/vbz.2007.0250
Boivin14	Boivin T, Henri H, Vavre F, Gidoin C, Veber P, Candau JN, Magnoux E, Roques A, Auger-Rozenberg MA. (2014). Epidemiology of asexuality induced by the endosymbiotic Wolbachia across phytophagous wasp species: host plant specialization matters. Mol Ecol. 23(9):2362-75. doi: 10.1111/mec.12737.
Bordbar14	Bordbar A, Soleimani S, Fardid F, Zolfaghari MR, Parvizi P. (2014). Three strains of Wolbachia pipientis and high rates of infection in Iranian sandfly species. Bull Entomol Res. 104(2):195-202. doi: 10.1017/S0007485313000631.
Boretti09	Boretti, F. S., Perreten, A., Meli, M. L., Cattori, V., Willi, B., Wengi, N., … Hofmann-Lehmann, R. (2009). Molecular Investigations of Rickettsia helvetica infection in dogs, foxes, humans, and Ixodes ticks. Applied and Environmental Microbiology, 75(10), 3230–3237. doi:10.1128/AEM.00220-09
Bouchon98	Bouchon, D., Rigaud, T., & Juchault, P. (1998). Evidence for widespread Wolbachia infection in isopod crustaceans: molecular identification and host feminization. Proceedings of the Royal Society B: Biological Sciences, 265(1401), 1081–1090.
Boudebouch09	Boudebouch, N., Sarih, M., Socolovschi, C., Amarouch, H., Hassar, M., Raoult, D., & Parola, P. (2009). Molecular survey for spotted fever group rickettsiae in ticks from Morocco. Clinical Microbiology and Infection: The Official Publication of the European Society of Clinical Microbiology and Infectious Diseases, 15 Suppl 2, 259–260. doi:10.1111/j.1469-0691.2008.02226.x
Bouwma06	Bouwma, A. M., Ahrens, M. E., DeHeer, C. J., & DeWayne Shoemaker, D. (2006). Distribution and prevalence of Wolbachia in introduced populations of the fire ant Solenopsis invicta. Insect Molecular Biology, 15(1), 89–93. doi:10.1111/j.1365-2583.2006.00614.x
Bouwma11	Bouwma, A. M., & Shoemaker, D. (2011). Wolbachia wSinvictaA infections in natural populations of the fire ant Solenopsis invicta: Testing for phenotypic effects. JOURNAL OF INSECT SCIENCE, 11.
Bruvo11	Bruvo, R., ADOLFSSON, S., SYMONOVA, R., LAMATSCH, D. K., SCHÖN, I., JOKELA, J., … MÜLLER, S. (2011). Few parasites, and no evidence for Wolbachia infections, in a freshwater ostracod inhabiting temporary ponds. Biological Journal of the Linnean Society, 102(1), 208–216.
Bryson14	Bryson RW Jr. (2014). Bacterial endosymbiont infections in 'living fossils': a case study of North American vaejovid scorpions. Mol Ecol Resour. 14(4):789-93. doi: 10.1111/1755-0998.12220.
Burri11	Burri, C., Dupasquier, C., Bastic, V., & Gern, L. (2011). Pathogens of Emerging Tick-Borne Diseases, Anaplasma phagocytophilum, Rickettsia spp., and Babesia spp., in Ixodes Ticks Collected from Rodents at Four Sites in Switzerland (Canton of Bern). Vector-Borne and Zoonotic Diseases, 11(7), 939–944.
Campbell04	Campbell, C. L., Mummey, D. L., Schmidtmann, E. T., & Wilson, W. C. (2004). Culture-independent analysis of midgut microbiota in the arbovirus vector Culicoides sonorensis (Diptera_: Ceratopogonidae). Journal of Medical Entomology, 41(3), 340–348. doi:10.1603/0022-2585-41.3.340
Capelli09	Capelli, G., Montarsi, F., Porcellato, E., Maioli, G., Furnari, C., Rinaldi, L., … Otranto, D. (2009). Occurrence of Rickettsia felis in dog and cat fleas (Ctenocephalides felis) from Italy. Parasites & Vectors, 2 Suppl 1, S8. doi:10.1186/1756-3305-2-S1-S8
Carrington11	Carrington, L. B., Lipkowitz, J. R., Hoffmann, A. A., & Turelli, M. (2011). A re-examination of Wolbachia-induced cytoplasmic incompatibility in California Drosophila simulans. PloS One, 6(7), e22565.
Caspi-Fluger14	Caspi-Fluger A, Inbar M, Steinberg S, Friedmann Y, Freund M, Mozes-Daube N, Zchori-Fein E. (2014). Characterization of the symbiont Rickettsia in the mirid bug Nesidiocoris tenuis (Reuter) (Heteroptera: Miridae). Bull Entomol Res. 104(6):681-8. doi: 10.1017/S0007485314000492.
Cattel16	Cattel, J., Kaur, R., Gibert, P., Martinez, J., Fraimout, A., Jiggins, F., Andrieux, T., Siozios, S., Anfora, G., Miller, W., Rota-Stabelli, O., & Mouton, L. (2016) Wolbachia in European Populations of the Invasive Pest Drosophila suzukii: Regional Variation in Infection Frequencies. PLOS ONE 11(1):e0147766. doi: 10.1371/journal.pone.0147766
Chai11a	Chai, H.-N., & Du, Y.-Z. (2011). Detection and Phylogenetic Analysis of Wolbachia wsp in the Chilo suppressalis (Lepidoptera: Crambidae) in China. ANNALS OF THE ENTOMOLOGICAL SOCIETY OF AMERICA, 104(5), 998–1004. doi:10.1603/AN11072
Chai11b	Chai, H.-N., Du, Y.-Z., Qiu, B.-L., & Zhai, B.-P. (2011). Detection and phylogenetic analysis of Wolbachia in the Asiatic rice leafroller, Cnaphalocrocis medinalis, in Chinese populations. JOURNAL OF INSECT SCIENCE, 11.
Chang10	Chang, J., Masters, A., Avery, A., & Werren, J. H. (2010). A divergent Cardinium found in daddy long-legs (Arachnida: Opiliones). Journal of Invertebrate Pathology, 105(3), 220–227.
Charlat05	Charlat, S., Hornett, E. A., Dyson, E. A., Ho, P. P. Y., Loc, N. T., Schilthuizen, M., … Hurst, G. D. D. (2005). Prevalence and penetrance variation of male-killing Wolbachia across Indo-Pacific populations of the butterfly Hypolimnas bolina. Molecular Ecology, 14(11), 3525–3530. doi:10.1111/j.1365-294X.2005.02678.x
Charlat06	Charlat, S., Engelstädter, J., Dyson, E. A., Hornett, E. A., Duplouy, A., Tortosa, P., … Hurst, G. D. D. (2006). Competing Selfish Genetic Elements in the Butterfly Hypolimnas bolina. Current Biology, 16(24), 2453–2458. doi:10.1016/j.cub.2006.10.062
Charlat09	Charlat, S., Duplouy, A., Hornett, E. A., Dyson, E. A., Davies, N., Roderick, G. K., … Hurst, G. D. (2009). The joint evolutionary histories of Wolbachia and mitochondria in Hypolimnas bolina. BMC Evolutionary Biology, 9(1), 64. doi:10.1186/1471-2148-9-64
Chen09	Chen, X.-L., Xie, R.-R., Li, G.-Q., & Hong, X.-Y. (2009). SIMULTANEOUS DETECTION OF ENDOSYMBIONTS WOLBACHIA AND CARDINIUM IN SPIDER MITES (ACARI: TETRANYCHIDAE) BY MULTIPLEX-PCR. INTERNATIONAL JOURNAL OF ACAROLOGY, 35(5), 397–403. doi:10.1080/01647950903292756
Chen10	Chen, L.-L., Cook, J. M., Xiao, H., Hu, H.-Y., Niu, L.-M., & Huang, D.-W. (2010). High incidences and similar patterns of Wolbachia infection in fig wasp communities from three different continents. INSECT SCIENCE, 17(2), 101–111. doi:10.1111/j.1744-7917.2009.01291.x
Chen12	Chen, S.-J., Lu, F., Cheng, J.-A., Jiang, M.-X., & Way, M. O. (2012). Identification and Biological Role of the Endosymbionts Wolbachia in Rice Water Weevil (Coleoptera: Curculionidae). ENVIRONMENTAL ENTOMOLOGY, 41(3), 469–477. doi:10.1603/EN11195
Chen16a	Chen F, Coates B, He KL, Bai SX, Zhang TT, Wang ZY. (2016). Effects of Wolbachia on mitochondrial DNA variation in populations of Athetis lepigone (Lepidoptera: Noctuidae) in China. Mitochondrial DNA A DNA Mapp Seq Anal. 1-9. doi: 10.1080/24701394.2016.1197216.
Chen16b	Chen YT, Zhang YK, Du WX, Jin PY, Hong XY. (2016). Geography has a greater effect than Wolbachia infection on population genetic structure in the spider mite, Tetranychus pueraricola. Bull Entomol Res. 106(5):685-94. doi: 10.1017/S0007485316000444.
Cheng00	Cheng, Q., Ruel, T. D., Zhou, W., Moloo, S. K., Majiwa, P., O’neill, S. L., & Aksoy, S. (2000). Tissue distribution and prevalence of Wolbachia infections in tsetse flies, Glossina spp. Medical and Veterinary Entomology, 14(1), 44–50. doi:10.1046/j.1365-2915.2000.00202.x
CheyppeBuchmann11	Cheyppe-Buchmann, S., Bon, M.-C., Warot, S., Jones, W., Malausa, T., Fauvergue, X., & Ris, N. (2011). Molecular characterization of Psyttalia lounsburyi, a candidate biocontrol agent of the olive fruit fly, and its Wolbachia symbionts as a pre-requisite for future intraspecific hybridization. BIOCONTROL, 56(5), 713–724. doi:10.1007/s10526-011-9346-x
Chiel07	Chiel, E., Gottlieb, Y., Zchori-Fein, E., Mozes-Daube, N., Katzir, N., Inbar, M., & Ghanim, M. (2007). Biotype-dependent secondary symbiont communities in sympatric populations of Bemisia tabaci. Bulletin of Entomological Research, 97(4), 407–413. doi:10.1017/S0007485307005159
Chochlakis12	Chochlakis, D., Ioannou, I., Sandalakis, V., Dimitriou, T., Kassinis, N., Papadopoulos, B., … Psaroulaki, A. (2012). Spotted fever group Rickettsiae in ticks in Cyprus. Microbial Ecology, 63(2), 314–323. doi:10.1007/s00248-011-9926-4
Christou10	Christou, C., Psaroulaki, A., Antoniou, M., Toumazos, P., Ioannou, I., Mazeris, A., … Tselentis, Y. (2010). Rickettsia typhi and Rickettsia felis in Xenopsylla cheopis and Leptopsylla segnis parasitizing rats in Cyprus. The American Journal of Tropical Medicine and Hygiene, 83(6), 1301–1304. doi:10.4269/ajtmh.2010.10-0118
Chu11	Chu, D., Gao, C. S., De Barro, P., Zhang, Y. J., Wan, F. H., & Khan, I. A. (2011). Further insights into the strange role of bacterial endosymbionts in whitefly, Bemisia tabaci: comparison of secondary symbionts from biotypes B and Q in China. Bulletin of Entomological Research, 101(4), 477–486. doi:10.1017/S0007485311000083
Cicuttin13	Cicuttin, G., & Nava, S. (2013). Molecular identification of Rickettsia parkeri infecting Amblyomma triste ticks in an area of Argentina where cases of rickettsiosis were diagnosed. Memórias Do Instituto Oswaldo Cruz, 108(1), 123–125. doi:10.1590/S0074-02762013000100022
Cooper15	Cooper, W. R., Swisher, K. D., Garczynski, S. F., Munyaneza, J. E., & Horton, D. R. (2015) Wolbachia Infection Differs Among Divergent Mitochondrial Haplotypes of Bactericera cockerelli (Hemiptera: Triozidae). Annals of the Entomological Society of America 108(2): 137-145
Cooper17	Cooper, B. S., Ginsberg, P. S., Turelli, M., & Matute, D. R. (2017). Wolbachia in the Drosophila yakuba Complex: Pervasive Frequency Variation and Weak Cytoplasmic Incompatibility, but No Apparent Effect on Reproductive Isolation. Genetics 205(1): 333-351. doi.org/10.1534/genetics.116.196238
Cooper17b	Cooper WR, Garczynski SF, Horton DR, Unruh TR, Beers EH, Peter WS, Hilton RJ. (2017). Bacterial Endosymbionts of the Psyllid Cacopsylla pyricola (Hemiptera: Psyllidae) in the Pacific Northwestern United States. Environ Entomol. 46(2):393-402. doi: 10.1093/ee/nvx031.
Costa17	Costa FB, da Costa AP, Moraes-Filho J, Martins TF, Soares HS, Ramirez DG, Dias RA, Labruna MB. (2017). Rickettsia amblyommatis infecting ticks and exposure of domestic dogs to Rickettsia spp. in an Amazon-Cerrado transition region of northeastern Brazil. PLoS One. 12:e0179163. doi: 10.1371/journal.pone.0179163.
Curry15	Curry, M. M., Paliulis, L. V., Welch, K. D., Harwood, J. D., & White, J. A. (2015). Multiple endosymbiont infections and reproductive manipulations in a linyphiid spider population. Heredity 115(2): 146–152. doi:10.1038/hdy.2015.2
Dahmani17	Dahmani M, Davoust B, Rousseau F, Raoult D, Fenollar F, Mediannikov O. (2017). Natural Anaplasmataceae infection in Rhipicephalus bursa ticks collected from sheep in the French Basque Country. Ticks Tick Borne Dis. 8(1):18-24. doi: 10.1016/j.ttbdis.2016.09.009.
Das14	Das B, Satapathy T, Kar SK, Hazra RK. (2014). Genetic structure and Wolbachia genotyping in naturally occurring populations of Aedes albopictus across contiguous landscapes of Orissa, India. PLoS One. 9(4):e94094. doi: 10.1371/journal.pone.0094094.
Dautel06	Dautel, H., Dippel, C., Oehme, R., Hartelt, K., & Schettler, E. (2006). Evidence for an increased geographical distribution of Dermacentor reticulatus in Germany and detection of Rickettsia sp RpA4. International Journal of Medical Microbiology, 296, 149–156. doi:10.1016/j.ijmm.2006.01.013
Delgado09	Delgado, A. M., & Cook, J. M. (2009). Effects of a sex-ratio distorting endosymbiont on mtDNA variation in a global insect pest. BMC Evolutionary Biology, 9(1), 49. doi:10.1186/1471-2148-9-49
DeLuna09	De Luna, C. J., Moro, C. V., Guy, J. H., Zenner, L., & Sparagano, O. A. E. (2009). Endosymbiotic bacteria living inside the poultry red mite (Dermanyssus gallinae). EXPERIMENTAL AND APPLIED ACAROLOGY, 48(1-2), 105–113. doi:10.1007/s10493-008-9230-2
deOliveira15	de Oliveira, C., Goncalves, D., Baton, L., Shimabukuro, P., Carvalho, F. & Moreira, L. (2015). Broader prevalence of Wolbachia in insects including potential human disease vectors. Bulletin of Entomological Research 105: 305-315.
Dergousoff09	Dergousoff, S. J., Gajadhar, A. J. A., & Chilton, N. B. (2009). Prevalence of Rickettsia Species in Canadian Populations of Dermacentor andersoni and D. variabilis. Applied and Environmental Microbiology, 75(6), 1786–1789. doi:10.1128/AEM.02554-08
deSousa06	De Sousa, R., Edouard-Fournier, P., Santos-Silva, M., Amaro, F., Bacellar, F., & Raoult, D. (2006). Molecular detection of Rickettsia felis, Rickettsia typhi and two genotypes closely related to Bartonella elizabethae. The American Journal of Tropical Medicine and Hygiene, 75(4), 727–731.
deSousa06b	De Sousa, R., Barata, C., Vitorino, L., Santos-Silva, M., Carrapato, C., Torgal, J., … Bacellar, F. (2006). Rickettsia sibirica isolation from a patient and detection in ticks, Portugal. Emerging Infectious Diseases, 12(7), 1103–1108. doi:10.3201/eid1207.051494
Dittmar04	Dittmar, K., & Whiting, M. F. (2004). New Wolbachia Endosymbionts from Nearctic and Neotropical Fleas (Siphonaptera). The Journal of Parasitology, 90(5), 953–957. doi:10.2307/3286370
Dittmer14	Dittmer J, Beltran-Bech S, Lesobre J, Raimond M, Johnson M, Bouchon D. (2014). Host tissues as microhabitats for Wolbachia and quantitative insights into the bacterial community in terrestrial isopods. Mol Ecol. 23(10):2619-35. doi: 10.1111/mec.12760.
Doudoumis12	Doudoumis, V., Tsiamis, G., Wamwiri, F., Brelsfoard, C., Alam, U., Aksoy, E., … Takac, P. (2012). Detection and characterization of Wolbachia infections in laboratory and natural populations of different species of tsetse flies (genus Glossina). BMC Microbiology, 12(Suppl 1), S3.
Duh03	Duh, D., Petrovec, M., Trilar, T., Punda-Poli_, V., Bradari_, N., Klismani_, Z., & Avsic-Zupanc, T. (2003). A follow-up study on newly recognized spotted fever group rickettsiae in ticks collected in southern Croatia. Annals of the New York Academy of Sciences, 990, 149–151.
Duh06	Duh, D., Punda-Poli_, V., Trilar, T., Petrovec, M., Bradari_, N., & Avsic-Zupanc, T. (2006). Molecular identification of Rickettsia felis-like bacteria in Haemaphysalis sulcata ticks collected from domestic animals in southern Croatia. Annals of the New York Academy of Sciences, 1078, 347–351. doi:10.1196/annals.1374.068
Duplouy15	Duplouy A, Couchoux C, Hanski I, van Nouhuys S. (2015) Wolbachia Infection in a Natural Parasitoid Wasp Population. PLoS One 10(8):e0134843. doi: 10.1371/journal.pone.0134843.
Duron08	Duron, O., Bouchon, D., Boutin, S., Bellamy, L., Zhou, L., Engelstaedter, J., & Hurst, G. D. (2008). The diversity of reproductive parasites among arthropods: Wolbachia do not walk alone. Bmc Biology, 6.
Duron11	Duron, O., Raymond, M., & Weill, M. (2011). Many compatible Wolbachia strains coexist within natural populations of Culex pipiens mosquito. HEREDITY, 106(6), 986–993. doi:10.1038/hdy.2010.146
Dyab16	Dyab AK, Galal LA, Mahmoud AE, Mokhtar Y. (2016). Finding Wolbachia in Filarial larvae and Culicidae Mosquitoes in Upper Egypt Governorate. Korean J Parasitol. 54(3):265-72. doi: 10.3347/kjp.2016.54.3.265.
Dyson02	Dyson, E. A., Kamath, M. K., & Hurst, G. D. D. (2002). Wolbachia infection associated with all-female broods in Hypolimnas bolina (Lepidoptera: Nymphalidae): evidence for horizontal transmission of a butterfly male killer. Heredity, 88(3), 166–171. doi:10.1038/sj.hdy.6800021
Dyson04	Dyson, E. A., & Hurst, G. D. D. (2004). Persistence of an extreme sex-ratio bias in a natural population. Proceedings of the National Academy of Sciences of the United States of America, 101(17), 6520–6523. doi:10.1073/pnas.0304068101
Edwards11	Edwards, K. T., Goddard, J., Jones, T. L., Paddock, C. D., & Varela-Stokes, A. S. (2011). Cattle and the Natural History of Rickettsia parkeri in Mississippi. Vector-Borne and Zoonotic Diseases, 11(5), 485–491.
Ehounoud16	Ehounoud CB, Yao KP, Dahmani M, Achi YL, Amanzougaghene N, Kacou N'Douba A, N'Guessan JD, Raoult D, Fenollar F, Mediannikov O. (2016). Multiple Pathogens Including Potential New Species in Tick Vectors in Côte d'Ivoire. PLoS Negl Trop Dis. 10(1):e0004367. doi: 10.1371/journal.pntd.0004367.
Elfving10	Elfving, K., Olsen, B., Bergström, S., Waldenström, J., Lundkvist, A., Sjöstedt, A., … Nilsson, K. (2010). Dissemination of spotted fever rickettsia agents in Europe by migrating birds. PloS One, 5(1), e8572. doi:10.1371/journal.pone.0008572
Elfving12	Elfving, K., Lukinius, A., & Nilsson, K. (2012). Life cycle, growth characteristics and host cell response of Rickettsia helvetica in a Vero cell line. EXPERIMENTAL AND APPLIED ACAROLOGY, 56(2), 179–187. doi:10.1007/s10493-011-9508-7
Enigl05	Enigl, M., Zchori-Fein, E., & Schausberger, P. (2005). Negative Evidence of Wolbachia in the Predaceous Mite Phytoseiulus persimilis. Experimental & Applied Acarology, 36(4), 249–262. doi:10.1007/s10493-005-6075-9
Eremeeva08	Eremeeva, M. E., Warashina, W. R., Sturgeon, M. M., Buchholz, A. E., Olmsted, G. K., Park, S. Y., … Karpathy, S. E. (2008). Rickettsia typhi and R. felis in Rat Fleas (Xenopsylla cheopis), Oahu, Hawaii. Emerging Infectious Diseases, 14(10), 1613–1615. doi:10.3201/eid1410.080571
Eremeeva11	Eremeeva, M. E., Zambrano, M. L., Anaya, L., Beati, L., Karpathy, S. E., Santos-Silva, M. M., Salceda, B., MacBeth, D., Olguin, H., Dasch, G. A., & Aranda, C. A. (2011). Rickettsia rickettsii in Rhipicephalus ticks, Mexicali, Mexico. J Med Entomol. 48(2):418-21.
Evison12	Evison, S. E., Roberts, K. E., Laurenson, L., Pietravalle, S., Hui, J., Biesmeijer, J. C., … Hughes, W. O. (2012). Pervasiveness of parasites in pollinators. PloS One, 7(1), e30641.
Fenner17	Fenner, J., Seltzer, J., Peyton, S., Sullivan, H., Tolson, P., Walsh, R. P., Hill, J., & Counterman, B. A. (2017). Demographic Variation of Wolbachia Infection in the Endangered Mitchell's Satyr Butterfly. Insects 8(2): 50. doi:10.3390/insects8020050
Ferrari12	Ferrari, F. A. G., Goddard, J., Paddock, C. D., & Varela-Stokes, A. S. (2012). Rickettsia parkeri and Candidatus Rickettsia andeanae in Gulf Coast ticks, Mississippi, USA. Emerging Infectious Diseases, 18(10), 1705–1707. doi:10.3201/eid1810.120250
Floate11	Floate, K. D., Coghlin, P. C., & Dosdall, L. (2011). A Test Using Wolbachia Bacteria to Identify Eurasian Source Populations of Cabbage Seedpod Weevil, Ceutorhynchus obstrictus (Marsham), in North America. ENVIRONMENTAL ENTOMOLOGY, 40(4), 818–823. doi:10.1603/EN10315
Fornadel11	Fornadel, C. M., Zhang, X., Smith, J. D., Paddock, C. D., Arias, J. R., & Norris, D. E. (2011). High rates of Rickettsia parkeri infection in Gulf Coast ticks (Amblyomma maculatum) and identification of “Candidatus Rickettsia andeanae” from Fairfax County, Virginia. Vector-Borne and Zoonotic Diseases, 11(12), 1535–1539.
Fornadel12	Fornadel, C. M., Smith, J. D., Zawada, S. E., Arias, J. R., & Norris, D. E. (2012). Detection of Rickettsia massiliae in Rhipicephalus sanguineus from the Eastern United States. Vector-Borne and Zoonotic Diseases. Retrieved from http://online.liebertpub.com/doi/abs/10.1089/vbz.2012.1058
Frati06	Frati, F., Negri, I., Fanciulli, P. P., Pellecchia, M., & Dallai, R. (2006). Ultrastructural and molecular identification of a new Rickettsia endosymbiont in the springtail Onychiurus sinensis (Hexapoda, Collembola). Journal of Invertebrate Pathology, 93(3), 150–156. doi:10.1016/j.jip.2006.07.002
Fromont17	Fromont, C., M Riegler, JM Cook (2017). Relative Abundance and Strain Diversity in the Bacterial Endosymbiont Community of a Sap-Feeding Insect Across Its Native and Introduced Geographic Range. Microbial Ecology 1-13. doi:10.1007/s00248-017-0971-5.
Fukatsu99	Fukatsu, T., & Shimada, M. (1999). Molecular characterization of Rickettsia sp in a bruchid beetle, Kytorhinus sharpianus (Coleoptera_: Bruchidae). Applied Entomology and Zoology, 34(3), 391–397.
García-Vázquez16	García-Vázquez D, Ribera I. (2016). The origin of widespread species in a poor dispersing lineage (diving beetle genus Deronectes). PeerJ. 4:e2514
Gargili12	Gargili, A., Palomar, A. M., Midilli, K., Portillo, A., Kar, S., & Oteo, J. A. (2012). Rickettsia Species in Ticks Removed from Humans in Istanbul, Turkey. Vector-Borne and Zoonotic Diseases. Retrieved from http://online.liebertpub.com/doi/abs/10.1089/vbz.2012.0996
Gauthier14	Gauthier N, Clouet C, Perrakis A, Kapantaidaki D, Peterschmitt M, Tsagkarakou A. (2014). Genetic structure of Bemisia tabaci Med populations from home-range countries, inferred by nuclear and cytoplasmic markers: impact on the distribution of the insecticide resistance genes. Pest Manag Sci. 70(10):1477-91. doi: 10.1002/ps.3733. Epub
Gebiola12	Gebiola, M., Gómez-Zurita, J., Monti, M. M., Navone, P., & Bernardo, U. (2012). Integration of molecular, ecological, morphological and endosymbiont data for species delimitation within the Pnigalio soemius complex (Hymenoptera: Eulophidae). Molecular Ecology, 21(5), 1190–1208. doi:10.1111/j.1365-294X.2011.05428.x
Gerth15	Gerth, M., Saeed, A., White, J.A. & Bleidorn, C. (2015) Extensive screen for bacterial endosymbionts reveals taxon-specific distribution patterns among bees (Hymenoptera, Anthophila).FEMS Microbiology Ecology, 91(6), fiv047. http://dx.doi.org/10.1093/femsec/fiv047
Gilles08a	Gilles, J., Just, F. T., Silaghi, C., Pradel, I., Lengauer, H., Hellmann, K., & Pfister, K. (2008). Rickettsia felis in Fleas, France. Emerging Infectious Diseases, 14(4), 684–686. doi:10.3201/eid1404.071103
Gilles08b	Gilles, J., Just, F. T., Silaghi, C., Pradel, I., Passos, L. M. F., Lengauer, H., … Pfister, K. (2008). Rickettsia felis in Fleas, Germany. Emerging Infectious Diseases, 14(8), 1294–1296. doi:10.3201/eid1408.071546
Gilles09	Gilles, J., Silaghi, C., Just, F. T., Pradel, I., & Pfister, K. (2009). Polymerase Chain Reaction Detection of Rickettsia felis-Like Organism in Archaeopsylla erinacei (Siphonaptera: Pulicidae) From Bavaria, Germany. JOURNAL OF MEDICAL ENTOMOLOGY, 46(3), 703–707. doi:10.1603/033.046.0338
Giorgini10	Giorgini, M., Bernardo, U., Monti, M. M., Nappo, A. G., & Gebiola, M. (2010). Rickettsia symbionts cause parthenogenetic reproduction in the parasitoid wasp Pnigalio soemius (Hymenoptera: Eulophidae). Applied and Environmental Microbiology, 76(8), 2589–2599.
Glowska15	Glowska, E. Dragun-Damian, A., Dabert, M., & Gerth M. (2015). New Wolbachia supergroups detected in quill mites (Acari: Syringophilidae). Infection Genetics and Evolution 30, 140–146.
Glowska15	Glowska E, Dragun-Damian A, Dabert M, Gerth M. (2015). New Wolbachia supergroups detected in quill mites (Acari: Syringophilidae). Infect Genet Evol. 30:140-6. doi: 10.1016/j.meegid.2014.12.019
Goodacre06	Goodacre, S. L., Martin, O. Y., Thomas, C. F. G., & Hewitt, G. M. (2006). Wolbachia and other endosymbiont infections in spiders. Molecular Ecology, 15(2), 517–527. doi:10.1111/j.1365-294X.2005.02802.x
Gorham03	Gorham, C. H., Fang, Q. Q., & Durden, L. A. (2003). Wolbachia Endosymbionts in Fleas (Siphonaptera). The Journal of Parasitology, 89(2), 283–289. doi:10.2307/3285949
Gotoh03	Gotoh, T., Noda, H., & Hong, X.-Y. (2003). Wolbachia distribution and cytoplasmic incompatibility based on a survey of 42 spider mite species (Acari: Tetranychidae) in Japan. Heredity, 91(3), 208–216. doi:10.1038/sj.hdy.6800329
Graham10	Graham, R. I., Mainwaring, M. C., & Du Feu, R. (2010). Detection of spotted fever group Rickettsia spp. from bird ticks in the UK. MEDICAL AND VETERINARY ENTOMOLOGY, 24(3), 340–343. doi:10.1111/j.1365-2915.2010.00886.x
Graham12	Graham, R. I., Grzywacz, D., Mushobozi, W. L., & Wilson, K. (2012). Wolbachia in a major African crop pest increases susceptibility to viral disease rather than protects. Ecology Letters, 15(9), 993–1000. doi:10.1111/j.1461-0248.2012.01820.x
Gruwell09	Gruwell, M. E., Wu, J., & Normark, B. B. (2009). Diversity and Phylogeny of Cardinium (Bacteroidetes) in Armored Scale Insects (Hemiptera: Diaspididae). ANNALS OF THE ENTOMOLOGICAL SOCIETY OF AMERICA, 102(6), 1050–1061.
Guedes05	Guedes, E., Leite, R. C., Prata, M. C. A., Pacheco, R. C., Walker, D. H., & Labruna, M. B. (2005). Detection of Rickettsia rickettsii in the tick Amblyomma cajennense in a new Brazilian spotted fever-endemic area in the state of Minas Gerais. Memórias Do Instituto Oswaldo Cruz, 100(8), 841–845. doi:/S0074-02762005000800004
Gutzwiller15b	Gutzwiller F, Dedeine F, Kaiser W, Giron D, Lopez-Vaamonde C. (2015) Correlation between the green-island phenotype and Wolbachia infections during the evolutionary diversification of Gracillariidae leaf-mining moths. Ecol Evol 5(18):4049-62. doi: 10.1002/ece3.1580. eCollection 2015 Sep.
Guz12	Guz, N., Kocak, E., Akpinar, A. E., Gurkan, M. O., & Kilincer, A. N. (2012). Wolbachia infection in Trissolcus species (Hymenoptera: Scelionidae). EUROPEAN JOURNAL OF ENTOMOLOGY, 109(2), 169–174.
Haine05	Haine, E. R., & Cook, J. M. (2005). Convergent incidences of Wolbachia infection in fig wasp communities from two continents. Proceedings. Biological Sciences / The Royal Society, 272(1561), 421–429. doi:10.1098/rspb.2004.2956
Hamm14a	Hamm, C., Handley, C., Pike, A., Forister, M., Fordyce, J., Nice, C., & others. (2014). Wolbachia infection and Lepidoptera of conservation concern. Journal of Insect Science (Madison), 14(6).
Hamm14b	Hamm CA, Begun DJ, Vo A, Smith CC, Saelao P, Shaver AO, Jaenike J, Turelli M. (2014). Wolbachia do not live by reproductive manipulation alone: infection polymorphism in Drosophila suzukii and D. subpulchrella. Mol Ecol 23(19):4871-85. doi: 10.1111/mec.12901.
Hartelt04	Hartelt, K., Oehme, R., Frank, H., Brockmann, S. O., Hassler, D., & Kimmig, P. (2004). Pathogens and symbionts in ticks: prevalence of Anaplasma phagocytophilum (Ehrlichia sp.), Wolbachia sp., Rickettsia sp., and Babesia sp in Southern Germany. International Journal of Medical Microbiology, 293, 86–92. doi:10.1016/S1433-1128(04)80013-5
Hartelt08	Hartelt, K., Pluta, S., Oehme, R., & Kimmig, P. (2008). Spread of ticks and tick-borne diseases in Germany due to global warming. Parasitology Research, 103 Suppl 1, S109–116. doi:10.1007/s00436-008-1059-4
Hassan13a	Hassan, S. S. H., Idris, E., & Majerus, M. E. N. (2013). Morph ratio dynamics under male-killer invasion: The case of the tropical butterfly Acraea encedon (Lepidoptera: Nymphalidae). Journal of Tropical Lepidoptera Research, 23(1), 14–21.
Hassan13b	Hassan, S. S. M., Idris, E., & Majerus, M. E. N. (2013). Male-killer dynamics in the tropical butterfly, Acraea encedana (Lepidoptera: Nymphalidae). Insect Science, 20(6), 717–722. doi:10.1111/j.1744-7917.2012.01570.x
Hayashi16	Hayashi, M., Watanabe, M., Yukuhiro, F., Nomura, M., & Kageyama, D. (2016). A Nightmare for Males? A Maternally Transmitted Male-Killing Bacterium and Strong Female Bias in a Green Lacewing Population. PLoS ONE 11(6):e0155794 doi:10.1371/journal.pone.0155794
Haynes03	Haynes, S., Darby, A. C., Daniell, T. J., Webster, G., van Veen, F. J. F., Godfray, H. C. J., … Douglas, A. E. (2003). Diversity of Bacteria Associated with Natural Aphid Populations. Applied and Environmental Microbiology, 69(12), 7216–7223. doi:10.1128/AEM.69.12.7216-7223.2003
Hedtke15	Hedtke SM, Blitzer EJ, Montgomery GA, Danforth BN. (2015) Introduction of Non-Native Pollinators Can Lead to Trans-Continental Movement of Bee-Associated Fungi. PLoS One 10(6):e0130560. doi: 10.1371/journal.pone.0130560.
Hernández-Roldán16	Hernández-Roldán JL, Dapporto L, Dinc_ V, Vicente JC, Hornett EA, _íchová J, Lukhtanov VA, Talavera G, Vila R. (2016). Integrative analyses unveil speciation linked to host plant shift in Spialia butterflies. Mol Ecol. 25(17):4267-84. doi: 10.1111/mec.13756.
Heukelbach04	Heukelbach, J., Bonow, I., Witt, L., Feldmeier, H., & Fischer, P. (2004). High infection rate of Wolbachia endobacteria in the sand flea Tunga penetrans from Brazil. Acta Tropica, 92(3), 225–230. doi:10.1016/j.actatropica.2004.08.005
Hildebrandt10	Hildebrandt, A., Krämer, A., Sachse, S., & Straube, E. (2010). Detection of Rickettsia spp. and Anaplasma phagocytophilum in Ixodes ricinus ticks in a region of Middle Germany (Thuringia). Ticks and Tick-Borne Diseases, 1(1), 52–56. doi:10.1016/j.ttbdis.2009.11.005
Himler11	Himler, A. G., Adachi-Hagimori, T., Bergen, J. E., Kozuch, A., Kelly, S. E., Tabashnik, B. E., … Hunter, M. S. (2011). Rapid spread of a bacterial symbiont in an invasive whitefly is driven by fitness benefits and female bias. Science (New York, N.Y.), 332(6026), 254–256. doi:10.1126/science.1199410
Hornok08	Hornok, S., Foeldvari, G., Elek, V., Naranjo, V., Farkas, R., & de la Fuente, J. (2008). Molecular identification of Anaplasma marginale and rickettsial endosymbionts in blood-sucking flies (Diptera_: Tabanidae, Muscidae) and hard ticks (Acari_: Ixodidae). Veterinary Parasitology, 154(3-4), 354–359. doi:10.1016/j.vetpar.2008.03.019
Hornok11	Hornok, S., de la Fuente, J., Biró, N., Fernández de Mera, I. G., Meli, M. L., Elek, V., … Farkas, R. (2011). First Molecular Evidence of Anaplasma ovis and Rickettsia spp. in Keds (Diptera: Hippoboscidae) of Sheep and Wild Ruminants. Vector-Borne and Zoonotic Diseases, 11(10), 1319–1321.
Hornok13	Hornok, S., Fuente, J., Horváth, G., Fernández de Mera, I. G., Wijnveld, M., Tánczos, B., … Jongejan, F. (2013). Molecular evidence of Ehrlichia canis and Rickettsia massiliae in ixodid ticks of carnivores from South Hungary. Acta Veterinaria Hungarica, 61(1), 42–50. doi:10.1556/AVet.2012.050
Hornok17	Hornok S, Mulvihill M, Sz_ke K, Gönczi E, Sulyok KM, Gyuranecz M, Hofmann-Lehmann R. (2017). Impact of a freeway on the dispersal of ticks and Ixodes ricinus-borne pathogens: forested resting areas may become Lyme disease hotspots. Acta Vet Hung. 2017 Jun;65(2):242-252. doi: 10.1556/004.2017.024.
Horta05	Horta, M. C., Pinter, A., Cortez, A., Soares, R. M., Gennari, S. M., Schumaker, T. T. S., & Labruna, M. B. (2005). Rickettsia felis (Rickettsiales: Rickettsiaceae) em Ctenocephalides felis felis (Siphonaptera: Pulicidae) no estado de São Paulo. Arq. Bras. Med. Vet. Zootec. 57(3): doi:10.1590/S0102-09352005000300008
Horta06	Horta, M. C., Chiebao, D. P., de Souza, D. B., Ferreira, F., Pinheiro, S. R., Labruna, M. B., & Schumaker, T. T. S. (2006). Prevalence of Rickettsia felis in the fleas Ctenocephalides felis felis and Ctenocephalides canis from two Indian villages in Sao Paulo Municipality, Brazil. Annals of the New York Academy of Sciences, 1078, 361–363. doi:10.1196/annals.1374.071
Hosokawa09	Hosokawa, T., Koga, R., Kikuchi, Y., Meng, X.-Y., & Fukatsu, T. (2009). Wolbachia as a bacteriocyte-associated nutritional mutualist. Proceedings of the National Academy of Sciences. doi:10.1073/pnas.0911476107
Hoy05	Hoy, M. A., & Jeyaprakash, A. (2005). Microbial diversity in the predatory mite Metaseiulus occidentalis (Acari: Phytoseiidae) and its prey, Tetranychus urticae (Acari: Tetranychidae). Biological Control, 32(3), 427–441. doi:10.1016/j.biocontrol.2004.12.012
Hsu11	Hsu, Y.-M., Lin, C.-C., Chomel, B. B., Tsai, K.-H., Wu, W.-J., Huang, C.-G., & Chang, C.-C. (2011). Identification of Rickettsia felis in fleas but not ticks on stray cats and dogs and the evidence of Rickettsia rhipicephali only in adult stage of Rhipicephalus sanguineus and Rhipicephalus haemaphysaloides. Comparative Immunology, Microbiology and Infectious Diseases, 34(6), 513–518. doi:10.1016/…
Hughes14	Hughes GL, Samuels SK, Shaikh K, Rasgon JL, Vardo-Zalik AM. (2014). Discrimination of the Plasmodium mexicanum vectors Lutzomyia stewarti and Lutzomyia vexator by a PCR-RFLP assay and Wolbachia infection. J Vector Ecol. 39(1):224-7. doi: 10.1111/j.1948-7134.2014.12092.x.
Hun11	Hun, L., Troyo, A., Taylor, L., Barbieri, A. M., & Labruna, M. B. (2011). First report of the isolation and molecular characterization of Rickettsia amblyommii and Rickettsia felis in Central America. Vector-Borne and Zoonotic Diseases, 11(10), 1395–1397.
Hung05	Hung, Y. C., Wang, C. H., & Ko, C. C. (2005). Studies on the secondary endosymbionts of Bemisia tabaci (Gennadius) (Hemiptera: Aleyrodidae) in Taiwan. Formosan Entomologist, 25, 145–157.
Ilinsky16	Ilinsky, Y., Kosterin, O. E. (2016). Molecular diversity of Wolbachia in Lepidoptera: Prevalent allelic content and high recombination of MLST genes. Molecular Phylogenetics and Evolution 109: 164-179. doi.org/10.1016/j.ympev.2016.12.034
Ishikura03	Ishikura, M., Ando, S., Shinagawa, Y., Matsuura, K., Hasegawa, S., Nakayama, T., … Watanabe, M. (2003). Phylogenetic analysis of spotted fever group rickettsiae based on gltA, 17-kDa, and rOmpA genes amplified by nested PCR from ticks in Japan. Microbiology and Immunology, 47(11), 823–832.
Izzard09	Izzard, L., Graves, S., Cox, E., Fenwick, S., Unsworth, N., & Stenos, J. (2009). Novel Rickettsia in Ticks, Tasmania, Australia. Emerging Infectious Diseases, 15(10), 1654–1656. doi:10.3201/eid1510.090799
Izzard10	Izzard, L. (2010). Rickettsiales and rickettsial diseases in Australia (phd). Murdoch University. Retrieved from http://researchrepository.murdoch.edu.au/3888/
Jaenike10	Jaenike, J., Stahlhut, J. K., Boelio, L. M., & Unckless, R. L. (2010). Association between Wolbachia and Spiroplasma within Drosophila neotestacea: an emerging symbiotic mutualism? Molecular Ecology, 19(2), 414–425. doi:10.1111/j.1365-294X.2009.04448.x
Jeong09	Jeong, G., Lee, K., Choi, J., Hwang, S., Park, B., Kim, W., … Kim, J. (2009). Incidence of Wolbachia and Cardinium endosymbionts in the Osmia community in Korea. The Journal of Microbiology, 47(1), 28–32. doi:10.1007/s12275-009-0198-3
Jeong12	Jeong, G., Ahn, J., Jang, Y., Choe, J. C., & Choi, H. (2012). Wolbachia infection in the Loxoblemmus complex (Orthoptera: Gryllidae) in Korea. Journal of Asia-Pacific Entomology, 15(4), 563–566. doi:10.1016/j.aspen.2012.07.002
Ji15	Ji HL, Qi LD, Hong XY, Xie HF, Li YX. (2015) Effects of Host Sex, Plant Species, and Putative Host Species on the Prevalence of Wolbachia in Natural Populations of Bemisia tabaci (Hemiptera: Aleyrodidae): A Modified Nested PCR Study. J Econ Entomol 108(1):210-8. doi: 10.1093/jee/tou004.
Jiang10	Jiang, J., Yarina, T., Miller, M. K., Stromdahl, E. Y., & Richards, A. L. (2010). Molecular detection of Rickettsia amblyommii in Amblyomma americanum parasitizing humans. Vector-Borne and Zoonotic Diseases, 10(4), 329–340.
Jiang12	Jiang, J., Stromdahl, E. Y., & Richards, A. L. (2012). Detection of Rickettsia parkeri and Candidatus Rickettsia andeanae in Amblyomma maculatum Gulf Coast Ticks collected from humans in the United States. Vector-Borne and Zoonotic Diseases, 12(3), 175–182.
Jiang14	Jiang, W., Zhu, J., Chen, M., Yang, Q., Du, X., Chen, S., Zhang, L., Yu, Y., Yu, W. (2014). Wolbachia infection status and genetic structure in natural populations of Polytremis nascens (Lepidoptera: Hesperiidae). Infect Genet Evol 27:202-11. doi: 10.1016/j.meegid.2014.07.026.
Jiang14	Jiang W, Zhu J, Chen M, Yang Q, Du X, Chen S, Zhang L, Yu Y, Yu W. (2014). Wolbachia infection status and genetic structure in natural populations of Polytremis nascens (Lepidoptera: Hesperiidae). Infect Genet Evol. 27:202-11. doi: 10.1016/j.meegid.2014.07.026.
Jiang16	Jiang, W., Wu, Y., He, H., Zhu, J, & Yu, W. (2016) A prevalence survey of Wolbachia in Polytremis fukia (Lepidoptera: Hesperiidae). Journal of Asia-Pacific Entomology 19: 399-404. doi.org/10.1016/j.aspen.2016.04.014
Jiggins01	Jiggins, F. M., Bentley, J. K., Majerus, M. E., & Hurst, G. D. (2001). How many species are infected with Wolbachia? Cryptic sex ratio distorters revealed to be common by intensive sampling. Proceedings. Biological Sciences / The Royal Society, 268(1472), 1123–1126. doi:10.1098/rspb.2001.1632
Joanne15	Joanne, S., Vythilingam, I., Yugavathy, N., Leong, C.-S., Wong, M.-L., & AbuBakar, S. (2015). Distribution and dynamics of Wolbachia infection in Malaysian Aedes albopictus. Acta Tropica 148: 38-45. doi.org/10.1016/j.actatropica.2015.04.003
Johannesen17	Johannesen, J. (2017). Tracing the history and ecological context of Wolbachia double infection in a specialist host (Urophora cardui)—parasitoid (Eurytoma serratulae) system. Ecology and Evolution 7(3): 986–996.
Kachrimanidou10	Kachrimanidou, M., Souliou, E., Pavlidou, V., Antoniadis, A., & Papa, A. (2010). First detection of Rickettsia slovaca in Greece. EXPERIMENTAL AND APPLIED ACAROLOGY, 50(1), 93–96. doi:10.1007/s10493-009-9283-x
Kageyama02	Kageyama, D., Nishimura, G., Hoshizaki, S., & Ishikawa, Y. (2002). Feminizing Wolbachia in an insect, Ostrinia furnacalis (Lepidoptera: Crambidae). Heredity, 88(6), 444–449. doi:10.1038/sj.hdy.6800077
Kageyama04	Kageyama, D., Nishimura, G., Ohno, S., Takanashi, T., Hoshizaki, S., & Ishikawa, Y. (2004). Wolbachia infection and an all-female trait in Ostrinia orientalis and Ostrinia zaguliaevi. Entomologia Experimentalis et Applicata, 111(1), 79–83. doi:10.1111/j.0013-8703.2004.00153.x
Kageyama10	Kageyama, D., Narita, S., Imamura, T., & Miyanoshita, A. (2010). Detection and identification of Wolbachia endosymbionts from laboratory stocks of stored-product insect pests and their parasitoids. JOURNAL OF STORED PRODUCTS RESEARCH, 46(1), 13–19. doi:10.1016/j.jspr.2009.07.003
Kaiser10	Kaiser, W., Huguet, E., Casas, J., Commin, C., & Giron, D. (2010). Plant green-island phenotype induced by leaf-miners is mediated by bacterial symbionts. Proceedings of the Royal Society B: Biological Sciences, rspb20100214. doi:10.1098/rspb.2010.0214
Kantso10	Kantsø, B., Bo Svendsen, C., Moestrup Jensen, P., Vennestrøm, J., & Krogfelt, K. A. (2010). Seasonal and habitat variation in the prevalence of< i> Rickettsia helvetica</i> in< i> Ixodes ricinus</i> ticks from Denmark. Ticks and Tick-Borne Diseases, 1(2), 101–103.
Kapantaidaki15	Kapantaidaki, D. E., Ov_arenko, I., Fytrou, N., Knott, K. E., Bourtzis, K., & Tsagkarakou, A. (2015) Low levels of mitochondrial DNA and symbiont diversity in the worldwide agricultural pest, the greenhouse whitefly Trialeurodes vaporariorum (Hemiptera: Aleyrodidae). J Hered. 106(1):80-92. doi:10.1093/jhered/esu061.
Kar13	Kar, S., Yilmazer, N., Midilli, K., Ergin, S., & Gargili, A. (2013). Borrelia burgdorferi sl and Rickettsia spp. in Ticks Collected from European Part of Turkey. Kafkas Üniversitesi Veteriner Fakültesi Dergisi, 19(1), 19–24.
Karami16	Karami M, Moosa-Kazemi SH, Oshaghi MA, Vatandoost H, Sedaghat MM, Rajabnia R, Hosseini M, Maleki-Ravasan N, Yahyapour Y, Ferdosi-Shahandashti E. (2016). Wolbachia Endobacteria in Natural Populations of Culex pipiens of Iran and Its Phylogenetic Congruence. J Arthropod Borne Dis. 10(3):347-63.
Karimi12	Karimi, J., Darsouei, R., Hosseini, M., & Stouthamer, R. (2012). Molecular characterization of Iranian Trichogrammatids (Hymenoptera: Trichogrammatidae) and their Wolbachia endosymbiont. JOURNAL OF ASIA-PACIFIC ENTOMOLOGY, 15(1), 73–77. doi:10.1016/j.aspen.2011.08.004
Karpathy09	Karpathy, S. E., Hayes, E. K., Williams, A. M., Hu, R., Krueger, L., Bennett, S., … Moore, W. (2009). Detection of Rickettsia felis and Rickettsia typhi in an area of California endemic for murine typhus. Clinical Microbiology and Infection, 15, 218–219.
Karut14	Karut, K., & Tok, B. (2014). Secondary endosymbionts of Turkish Bemisia tabaci (Gennadius) populations. Phytoparasitica 42:413–419 doi:10.1007/s12600-013-0378-x
Kautz13	Kautz, S., Rubin, B. E. R., & Moreau, C. S. (2013). Bacterial Infections across the Ants: Frequency and Prevalence of Wolbachia, Spiroplasma, and Asaia. Psyche: A Journal of Entomology, 2013. doi:10.1155/2013/936341
Kawabata06	Kawabata, H., Ando, S., Kishimoto, T., Kurane, I., Takano, A., Nogami, S., … Watanabe, H. (2006). First detection of Rickettsia in soft-bodied ticks associated with seabirds, Japan. Microbiology and Immunology, 50(5), 403–406.
Kawasaki10	Kawasaki, Y., Ito, M., Miura, K., & Kajimura, H. (2010). Superinfection of five Wolbachia in the alnus ambrosia beetle, Xylosandrus germanus (Blandford) (Coleoptera: Curuculionidae). BULLETIN OF ENTOMOLOGICAL RESEARCH, 100(2), 231–239. doi:10.1017/S000748530999023X
Kawasaki16	Kawasaki, Y., Schuler, H., Stauffer, C., Lakatos, F., & Kajimura, H. (2016). Wolbachia endosymbionts in haplodiploid and diploid scolytine beetles (Coleoptera: Curculionidae: Scolytinae). Environmental Microbiology Reports (2016) 8(5):680–688. doi:10.1111/1758-2229.12425
Kelly04	Kelly, P. J., Meads, N., Theobald, A., Fournier, P.-E., & Raoult, D. (2004). Rickettsia felis, Bartonella henselae, and B. clarridgeiae, New Zealand. Emerging Infectious Diseases, 10(5), 967–968. doi:10.3201/eid1005.030986
Kelly05a	Kelly, P., Rolain, J.-M., & Raoult, D. (2005). Prevalence of human pathogens in cat and dog fleas in New Zealand. The New Zealand Medical Journal, 118(1226), U1754.
Kelly05b	Kelly, D. J., Carmichael, J. R., Booton, G. C., Poetter, K. F., & Fuerst, P. A. (2005). Novel spotted fever group Rickettsiae (SFGR) infecting Amblyomma americanum ticks in Ohio, USA. Annals of the New York Academy of Sciences, 1063, 352–355. doi:10.1196/annals.1355.058
Kelly10	Kelly, P. J., Lucas, H., Eremeeva, M. E., Dirks, K. G., Rolain, J. M., Yowell, C., … Raoult, D. (2010). Rickettsia felis, West Indies. Emerging Infectious Diseases, 16(3), 570–571. doi:10.3201/eid1603.091431
Kern15	Kern P, Cook JM, Kageyama D, Riegler M. (2015) Double trouble: combined action of meiotic drive and Wolbachia feminization in Eurema butterflies. Biol Lett 11(5):20150095. doi: 10.1098/rsbl.2015.0095.
Kernif12	Kernif, T., Socolovschi, C., Wells, K., Lakim, M. B., Inthalad, S., Slesak, G., … Parola, P. (2012). Bartonella and Rickettsia in arthropods from the Lao PDR and from Borneo, Malaysia. Comparative Immunology, Microbiology and Infectious Diseases, 35(1), 51–57. doi:10.1016/j.cimid.2011.10.003
Kikuchi03	Kikuchi, Y., & Fukatsu, T. (2003). Diversity of Wolbachia Endosymbionts in Heteropteran Bugs. Applied and Environmental Microbiology, 69(10), 6082–6090. doi:10.1128/AEM.69.10.6082-6090.2003
Kim06	Kim, C.-M., Yi, Y.-H., Yu, D.-H., Lee, M.-J., Cho, M.-R., Desai, A. R., … Chae, J.-S. (2006). Tick-Borne Rickettsial Pathogens in Ticks and Small Mammals in Korea. Applied and Environmental Microbiology, 72(9), 5766–5776. doi:10.1128/AEM.00431-06
Kittayapong03	Kittayapong, P., Jamnongluk, W., Thipaksorn, A., Milne, J. R., & Sindhusake, C. (2003). Wolbachia infection complexity among insects in the tropical rice-field community. Molecular Ecology, 12(4), 1049–1060. doi:10.1046/j.1365-294X.2003.01793.x
Klopfstein16	Klopfstein, S., Kropf, C., & Baur, H. (2016). Wolbachia endosymbionts distort DNA barcoding in the parasitoid wasp genus Diplazon (Hymenoptera: Ichneumonidae). Zoological Journal of Linnean Society 177:541-557. doi: 10.1111/zoj.12380
Ko11	Ko, S., Kim, H. C., Yang, Y. C., Chong, S. T., Richards, A. L., Sames, W. J., … Chae, J. S. (2011). Detection of Rickettsia felis and Rickettsia typhi and Seasonal Prevalence of Fleas Collected from Small Mammals at Gyeonggi Province in the Republic of Korea. Vector-Borne and Zoonotic Diseases, 11(9), 1243–1251.
Kodandaramaiah11	Kodandaramaiah, U., Weingartner, E., Janz, N., Dalén, L., & Nylin, S. (2011). Population structure in relation to host-plant ecology and Wolbachia infestation in the comma butterfly. Journal of Evolutionary Biology, 24(10), 2173–2185. doi:10.1111/j.1420-9101.2011.02352.x
Kondo99	Kondo, N., Shimada, M., & Fukatsu, T. (1999). High prevalence of Wolbachia in the azuki bean beetle Callosobruchus chinensis (Coleoptera, Bruchidae). Zoological Science, 16(6), 955–962. doi:10.2108/zsj.16.955
Krawczyk15	Krawczyk, K., Szyma_czyk, M., Obr_palska-St_plowska, A. (2015). Prevalence of Endosymbionts in Polish Populations of Leptinotarsa decemlineata (Coleoptera: Chrysomelidae). J Insect Sci 15(1):106. doi:10.1093/jisesa/iev085
Krawczyk15	Krawczyk K, Szyma_czyk M, Obr_palska-St_plowska A. (2015) Prevalence of Endosymbionts in Polish Populations of Leptinotarsa decemlineata (Coleoptera: Chrysomelidae). J Insect Sci 15. pii: 106. doi: 10.1093/jisesa/iev085.
Kriesner16	Kriesner, P., Conner, W. R., Weeks, A. R., Turelli, M. & Hoffmann, A. A. (2016) Persistence of a Wolbachia infection frequency cline in Drosophila melanogaster and the possible role of reproductive dormancy. Evolution 70(5): 979–997.
Kuchler09	Kuechler, S. M., Kehl, S., & Dettner, K. (2009). Characterization and localization of Rickettsia sp in water beetles of genus Deronectes (Coleoptera: Dytiscidae). FEMS MICROBIOLOGY ECOLOGY, 68(2), 201–211. doi:10.1111/j.1574-6941.2009.00665.x
Kuo12	Kuo, C. C., Huang, J. L., Lin, T. E., & Wang, H. C. (2012). Detection of Rickettsia spp. and host and habitat associations of fleas (Siphonaptera) in eastern Taiwan. MEDICAL AND VETERINARY ENTOMOLOGY, 26(3), 341–350. doi:10.1111/j.1365-2915.2012.01009.x
Labruna04	Labruna, M. B., McBride, J. W., Bouyer, D. H., Camargo, L. M. A., Camargo, E. P., & Walker, D. H. (2004). Molecular evidence for a spotted fever group Rickettsia species in the tick Amblyomma longirostre in Brazil. Journal of Medical Entomology, 41(3), 533–537.
Labruna07a	Labruna, M. B., Ogrzewalska, M., Moraes-Filho, J., Lepe, P., Gallegos, J. L., & López, J. (2007). Rickettsia fells in Chile. Emerging Infectious Diseases, 13(11), 1794–1795. doi:10.3201/eid1311.070782
Labruna07b	Labruna, M. B., Pacheco, R. C., Nava, S., Brandão, P. E., Richtzenhain, L. J., & Guglielmone, A. A. (2007). Infection by Rickettsia bellii and Candidatus “Rickettsia amblyommii” in Amblyomma neumanni ticks from Argentina. Microbial Ecology, 54(1), 126–133. doi:10.1007/s00248-006-9180-3
Lachowska10	Lachowska, D., Kajtoch, L., & Knutelski, S. (2010). Occurrence of Wolbachia in central European weevils: correlations with host systematics, ecology, and biology. ENTOMOLOGIA EXPERIMENTALIS ET APPLICATA, 135(1), 105–118. doi:10.1111/j.1570-7458.2010.00974.x
Leggewie18	Leggewie M, Krumkamp R, Badusche M, Heitmann A, Jansen S, Schmidt-Chanasit J, Tannich E, Becker SC. 2018. Culex torrentium mosquitoes from Germany are negative for Wolbachia. Med Vet Entomol.32:115-120. doi: 10.1111/mve.12270.
Lehmann11	Lehmann, G. U. C., Siozios, S., Bourtzis, K., Reinhold, K., & Lehmann, A. W. (2011). Thelytokous parthenogenesis and the heterogeneous decay of mating behaviours in a bushcricket (Orthopterida). JOURNAL OF ZOOLOGICAL SYSTEMATICS AND EVOLUTIONARY RESEARCH, 49(2), 102–109. doi:10.1111/j.1439-0469.2010.00588.x
Lerette15	Lerette, S., Aisenberg, A., Costa, F. G., Sotelo-Silveira, J. R., & Bidegaray-Batista, L. (2015). Deteccion de la bacteria endosimbionte Wolbachia en la Arana Lobo Allocosa alticeps y posibles efectos sobre la proporcion sexual. Bol. Soc. Zool. Uruguay 24(2):171-176.
Lewis14	Lewis, S. E., Rice, A., Hurst, G. D. D., & Baylis, M. (2014) First detection of endosymbiotic bacteria in biting midges Culicoides pulicaris and Culicoides punctatus, important Palaearctic vectors of bluetongue virus. Medical and Veterinary Entomology 28: 453–456.
Lewis14	Lewis SE, Rice A, Hurst GD, Baylis M. (2014). First detection of endosymbiotic bacteria in biting midges Culicoides pulicaris and Culicoides punctatus, important Palaearctic vectors of bluetongue virus. Med Vet Entomol. 28(4):453-6. doi: 10.1111/mve.12055.
Li13	Li, J., Wang, Z.-Y., Bourguet, D., & He, K.-L. (2013). Wolbachia Infection in Populations of Ostrinia furnacalis: Diversity, Prevalence, Phylogeny and Evidence for Horizontal Transmission. Journal of Integrative Agriculture, 12(2), 283–295.
Lin08	Lin, H.-Z., & Li, Z.-X. (2008). Characteristics of Wolbachia infection in natural populations of Bemisia tabaci in Fujian province. ACTA ENTOMOLOGICA SINICA, 51(1), 14.
Lis15	Lis A, Marya_ska-Nadachowska A, Kajtoch _. (2015) Relations of Wolbachia Infection with Phylogeography of Philaenus spumarius (Hemiptera: Aphrophoridae) Populations Within and Beyond the Carpathian Contact Zone. Microb Ecol 70(2):509-21. doi: 10.1007/s00248-015-0570-2. Epub 2015 Feb 14.
Liu06	Liu, Y., Miao, H., & Hong, X.-Y. (2006). Distribution of the endosymbiotic bacterium Cardinium in Chinese populations of the carmine spider mite Tetranychus cinnabarinus (Acari: Tetranychidae). Journal of Applied Entomology, 130(9-10), 523–529. doi:10.1111/j.1439-0418.2006.01112.x
Lledo10	Lledó, L., Giménez-Pardo, C., Domínguez-Peñafiel, G., Sousa, R., Gegúndez, M. I., Casado, N., & Criado, A. (2010). Molecular detection of hemoprotozoa and Rickettsia species in arthropods collected from wild animals in the Burgos Province, Spain. Vector-Borne and Zoonotic Diseases, 10(8), 735–738.
Loftis05	Loftis, A. D., Gill, J. S., Schriefer, M. E., Levin, M. L., Eremeeva, M. E., Gilchrist, M. J. R., & Dasch, G. A. (2005). Detection of Rickettsia, Borrelia, and Bartonella in Carios kelleyi (Acari: Argasidae). Journal of Medical Entomology, 42(3), 473–480.
Loftis06	Loftis, A. D., Reeves, W. K., Szumlas, D. E., Abbassy, M. M., Helmy, I. M., Moriarity, J. R., & Dasch, G. A. (2006). Rickettsial agents in Egyptian ticks collected from domestic animals. Experimental & Applied Acarology, 40(1), 67–81. doi:10.1007/s10493-006-9025-2
Lohman08	Lohman, D. J., Peggie, D., Pierce, N. E., & Meier, R. (2008). Phylogeography and genetic diversity of a widespread Old World butterfly, Lampides boeticus (Lepidoptera: Lycaenidae). BMC Evolutionary Biology, 8(1), 301. doi:10.1186/1471-2148-8-301
Lu12	Lu, M.-H., Zhang, K.-J., & Hong, X.-Y. (2012). Tripartite associations among bacteriophage WO, Wolbachia, and host affected by temperature and age in Tetranychus urticae. EXPERIMENTAL AND APPLIED ACAROLOGY, 58(3), 207–220. doi:10.1007/s10493-012-9578-1
Luchetti04	Luchetti, A., Mantovani, B., Fioravanti, M. L., & Trentini, M. (2004). Wolbachia infection in the newly described Ecuadorian sand flea, Tunga trimamillata. Experimental Parasitology, 108(1-2), 18–23. doi:10.1016/j.exppara.2004.07.003
_ukasiewicz16	_ukasiewicz K, Sanak M, W_grzyn G. (2016). A lack of Wolbachia-specific DNA in samples from apollo butterfly (Parnassius apollo, Lepidoptera: Papilionidae) individuals with deformed or reduced wings. J Appl Genet. 57(2):271-4. doi: 10.1007/s13353-015-0318-1.
Machtelinckx09	Machtelinckx, T., Van Leeuwen, T., Vanholme, B., Gehesquiere, B., Dermauw, W., Vandekerkhove, B., … De Clercq, P. (2009). Wolbachia induces strong cytoplasmic incompatibility in the predatory bug Macrolophus pygmaeus. INSECT MOLECULAR BIOLOGY, 18(3), 373–381. doi:10.1111/j.1365-2583.2009.00877.x
Maioli12	Maioli, G., Pistone, D., Bonilauri, P., Pajoro, M., Barbieri, I., Patrizia, M., … Dottori, M. (2012). Ethiological agents of rickettsiosis and anaplasmosis in ticks collected in Emilia-Romagna region (Italy) during 2008 and 2009. EXPERIMENTAL AND APPLIED ACAROLOGY, 57(2), 199–208. doi:10.1007/s10493-012-9535-z
Maniatsi10	Maniatsi, S., Bourtzis, K., & Abatzopoulos, T. J. (2010). May parthenogenesis in Artemia be attributed to Wolbachia? Hydrobiologia, 651(1), 317–322.
Marcon11	Marcon, H. S., Coscrato, V. E., Selivon, D., Perondini, A. L. P., & Marino, C. L. (2011). Variations in the sensitivity of different primers for detecting Wolbachia in Anastrepha (diptera: tephritidae). Brazilian Journal of Microbiology, 42(2), 778–785.
Marquez02	Marquez, F. J., Muniain, M. A., Perez, J. M., & Pachon, J. (2002). Presence of Rickettsia felis in the Cat Flea from Southwestern Europe1. Emerging Infectious Diseases, 8(1), 89–91. doi:10.3201/eid0801.010193
Martin09	Martin, O. Y., & Goodacre, S. L. (2009). Widespread infections by the bacterial endosymbiont Cardinium in arachnids. JOURNAL OF ARACHNOLOGY, 37(1), 106–108. doi:10.1636/SH08-05.1
Martin12	Martin, O. Y., Gubler, A., Wimmer, C., Gerrnann, C., & Bernasconi, M. V. (2012). Infections with Wolbachia and Spiroplasma in the Scathophagidae and other Muscoidea. INFECTION GENETICS AND EVOLUTION, 12(2), 315–323. doi:10.1016/j.meegid.2011.11.012
Martin13	Martin, O. Y., Puniamoorthy, N., Gubler, A., Wimmer, C., & Bernasconi, M. V. (2013). Infections with Wolbachia, Spiroplasma, and Rickettsia in the Dolichopodidae and other Empidoidea. Infection, Genetics and Evolution: Journal of Molecular Epidemiology and Evolutionary Genetics in Infectious Diseases, 13, 317–330. doi:10.1016/j.meegid.2012.11.005
MartinezRodriguez13a	Martínez-Rodríguez, P., Sarasa, J., Peco, B., Jauregui, B. M., Rivera, D., & Bella, J. L. (2013). Endosymbiont-free ants: Molecular biological evidence that neither Wolbachia, Cardinium or any other bacterial endosymbionts play a role in thelytokous parthenogenesis in the harvester ant species, Messor barbarus and M. capitatus (Hymenoptera: Formicidae). Eur. J. Entomol, 110(2), 197–204.
MartinezRodriguez13b	Martínez-Rodríguez, P., Hernández-Pérez, M., & Bella, J. L. (2013). Detection of Spiroplasma and Wolbachia in the bacterial gonad community of Chorthippus parallelus. Microbial Ecology, 66(1), 211–223. doi:10.1007/s00248-013-0226-z
Marubayashi14	Marubayashi JM, Kliot A, Yuki VA, Rezende JA, Krause-Sakate R, Pavan MA, Ghanim M. (2014). Diversity and localization of bacterial endosymbionts from whitefly species collected in Brazil. PLoS One. 9(9):e108363. doi: 10.1371/journal.pone.0108363.
Matsumoto09	Matsumoto, K., & Inokuma, H. (2009). Identification of Spotted Fever Group Rickettsia Species by Polymerase Chain Reaction-Restriction Fragment Length Polymorphism Analysis of the Sca4 Gene. Vector-Borne and Zoonotic Diseases, 9(6), 747–749.
Mattio15	Mattio MF, Argüello Caro EB, Rodriguero MS, Dumón AD, Alemandri VM, Truol G. (2015) Wolbachia Occurrence in Planthopper (Hemiptera: Delphacidae) Vectors of Cereal Viruses in Argentina. J Econ Entomol 108(4):1526-30. doi: 10.1093/jee/tov140.
Mba11	Mba, P. A., Marié, J. L., Rolain, J. M., Davoust, B., Beaucournu, J. C., Raoult, D., & Parola, P. (2011). Rickettsia felis and Bartonella henselae in Fleas from Lebanon. Vector-Borne and Zoonotic Diseases, 11(7), 991–992.
Mbewe15	Mbewe NJ, Mweempwa C, Guya S, Wamwiri FN. (2015) Microbiome frequency and their association with trypanosome infection in male Glossina morsitans centralis of Western Zambia. Vet Parasitol 211(1-2):93-8. doi: 10.1016/j.vetpar.2015.04.027
McHugh13	McHugh, A., Bierzychudek, P., Greever, C., Marzulla, T., Buskirk, R. V., & Binford, G. (2013). A molecular phylogenetic analysis of Speyeria and its implications for the management of the threatened Speyeria zerene hippolyta. Journal of Insect Conservation, 17(6), 1237–1253. doi:10.1007/s10841-013-9605-5
Medeiros11	Medeiros, A. P., Souza, A. P. de, Moura, A. B. de, Lavina, M. S., Bellato, V., Sartor, A. A., … Labruna, M. B. (2011). Spotted fever group Rickettsia infecting ticks (Acari: Ixodidae) in the state of Santa Catarina, Brazil. Memórias Do Instituto Oswaldo Cruz, 106(8), 926–930.
Mediannikov10	Mediannikov, O, J. F. T. (2010). Rickettsia africae, Western Africa. Emerging Infectious Diseases, 16(3), 571–3. doi:10.3201/eid1603.090346
Mediannikov11	Mediannikov, O., Cabre, O., Qu, F., Socolovschi, C., Davoust, B., Marié, J. L., … Raoult, D. (2011). Rickettsia felis and Bartonella clarridgeiae in fleas from New Caledonia. Vector-Borne and Zoonotic Diseases, 11(2), 181–183.
Mediannikov12	Mediannikov, O., Davoust, B., Socolovschi, C., Tshilolo, L., Raoult, D., & Parola, P. (2012). Spotted fever group rickettsiae in ticks and fleas from the Democratic Republic of the Congo. Ticks and Tick-Borne Diseases, 3(5-6), 371–373. doi:10.1016/j.ttbdis.2012.10.015
Michalik18	Michalik A, Szwedo J, Stroi_ski A, _wierczewski D, Szklarzewicz T. 2018. Symbiotic cornucopia of the monophagous planthopper Ommatidiotus dissimilis (Fallén, 1806) (Hemiptera: Fulgoromorpha: Caliscelidae). Protoplasma. doi: 10.1007/s00709-018-1234-0.
Michel-salzat01	Michel-Salzat, A., Cordaux, R., & Bouchon, D. (2001). Wolbachia diversity in the Porcellionides pruinosus complex of species (Crustacea: Oniscidea): evidence for host-dependent patterns of infection. Heredity, 87(Pt 4), 428–434.
Mingchay14	Mingchay P, Sai-Ngam A, Phumee A, Bhakdeenuan P, Lorlertthum K, Thavara U, Tawatsin A, Choochote W, Siriyasatien P. (2014). Wolbachia supergroups A and B in natural populations of medically important filth flies (diptera: muscidae, calliphoridae, and sarcophagidae) in Thailand. Southeast Asian J Trop Med Public Health. 45(2):309-18.
Mitsuhashi11	Mitsuhashi, W., Ikeda, H., & Muraji, M. (2011). Fifty-year trend towards suppression of Wolbachia-induced male-killing by its butterfly host, Hypolimnas bolina. JOURNAL OF INSECT SCIENCE, 11.
Mixson06	Mixson, T. R., Campbell, S. R., Gill, J. S., Ginsberg, H. S., Reichard, M. V., Schulze, T. L., & Dasch, G. A. (2006). Prevalence of Ehrlichia, Borrelia, and Rickettsial agents in Amblyomma americanum (Acari: Ixodidae) collected from nine states. Journal of Medical Entomology, 43(6), 1261–1268.
Mock16	Mock A, Tajovsk_ K, _urovcová M, Jaro_ová A, Kocourek P, Gruber J, Angyal D, Spelda J. (2016). Hungarosoma bokori Verhoeff, 1928 (Diplopoda: Chordeumatida): new insights into its taxonomy, systematics, molecular genetics, biogeography and ecology. Zootaxa. 4178(2):234-256. doi: 10.11646/zootaxa.4178.2.4.
Morag12	Morag, N., Klement, E., Saroya, Y., Lensky, I., & Gottlieb, Y. (2012). Prevalence of the symbiont Cardinium in Culicoides (Diptera: Ceratopogonidae) vector species is associated with land surface temperature. The FASEB Journal. Retrieved from http://www.fasebj.org/content/early/2012/06/14/fj.12-210419.short
Morrow14	Morrow JL, Frommer M, Shearman DC, Riegler M. (2014). Tropical tephritid fruit fly community with high incidence of shared Wolbachia strains as platform for horizontal transmission of endosymbionts. Environ Microbiol. 16(12):3622-37. doi: 10.1111/1462-2920.12382. Epub
Morrow15	Morrow, J. L., Frommer, M., Royer, J. E., Shearman, D. C. A., & Riegler, M. (2015). Wolbachia pseudogenes and low prevalence infections in tropical but not temperate Australian tephritid fruit flies: manifestations of lateral gene transfer and endosymbiont spillover?. BMC Evolutionary Biology 201515:202. doi: 10.1186/s12862-015-0474-2
Movila11	Movila, A., Reye, A. L., Dubinina, H. V., Tolstenkov, O. O., Toderas, I., Hübschen, J. M., … Alekseev, A. N. (2011). Detection of Babesia sp. EU1 and members of spotted fever group rickettsiae in ticks collected from migratory birds at Curonian Spit, North-Western Russia. Vector-Borne and Zoonotic Diseases, 11(1), 89–91.
Muller12	Müller, M. J., von Mühlen, C., Valiati, V. H., & da Silva Valente, V. L. (2012). Wolbachia pipientis is associated with different mitochondrial haplotypes in natural populations of Drosophila willistoni. Journal of Invertebrate Pathology, 109(1), 152–155. doi:10.1016/j.jip.2011.08.011
Mura08	Mura, A., Socolovschi, C., Ginesta, J., Lafrance, B., Magnan, S., Rolain, J.-M., … Parola, P. (2008). Molecular detection of spotted fever group rickettsiae in ticks from Ethiopia and Chad. Transactions of the Royal Society of Tropical Medicine and Hygiene, 102(9), 945–949. doi:10.1016/j.trstmh.2008.03.015
Nakamura09	Nakamura, Y., Kawai, S., Yukuhiro, F., Ito, S., Gotoh, T., Kisimoto, R., … Noda, H. (2009). Prevalence of Cardinium bacteria in planthoppers and spider mites and taxonomic revision of “Candidatus Cardinium hertigii” based on detection of a new Cardinium group from biting midges. Applied and Environmental Microbiology, 75(21), 6757–6763.
Nakamura12	Nakamura, Y., Yukuhiro, F., Matsumura, M., & Noda, H. (2012). Cytoplasmic incompatibility involving Cardinium and Wolbachia in the white-backed planthopper Sogatella furcifera (Hemiptera: Delphacidae). APPLIED ENTOMOLOGY AND ZOOLOGY, 47(3), 273–283. doi:10.1007/s13355-012-0120-z
Narita06	Narita, S., Nomura, M., Kato, Y., & Fukatsu, T. (2006). Genetic structure of sibling butterfly species affected by Wolbachia infection sweep: evolutionary and biogeographical implications. Molecular Ecology, 15(4), 1095–1108. doi:10.1111/j.1365-294X.2006.02857.x
Narita09	Narita, S., Shimajiri, Y., & Nomura, M. (2009). Strong cytoplasmic incompatibility and high vertical transmission rate can explain the high frequencies of Wolbachia infection in Japanese populations of Colias erate poliographus (Lepidoptera: Pieridae). BULLETIN OF ENTOMOLOGICAL RESEARCH, 99(4), 385–391. doi:10.1017/S0007485308006469
Narita11	Narita, S., Kageyama, D., Hiroki, M., Sanpei, T., Hashimoto, S., Kamitoh, T., & Kato, Y. (2011). Wolbachia-induced feminisation newly found in Eurema hecabe, a sibling species of Eurema mandarina (Lepidoptera: Pieridae). ECOLOGICAL ENTOMOLOGY, 36(3), 309–317. doi:10.1111/j.1365-2311.2011.01274.x
Nava08	Nava, S., Pérez-Martínez, L., Venzal, J. M., Portillo, A., Santibáñez, S., & Oteo, J. A. (2008). Rickettsia felis in Ctenocephalides felis from Argentina. Vector Borne and Zoonotic Diseases (Larchmont, N.Y.), 8(4), 465–466. doi:10.1089/vbz.2007.0243
Nguyen15	Nguyen, D. T., Spooner-Hart, R. N., & Riegler, M. (2015). Polyploidy versus endosymbionts in obligately thelytokous thrips. BMC Evolutionary Biology15:23 doi:10.1186/s12862-015-0304-6
Nguyen16	Nguyen, D. T., Spooner-Hart, R. N., & Riegler, M. (2016). Loss of Wolbachia but not Cardinium in the invasive range of the Australian thrips species, Pezothrips kellyanus. Biological Invasions 18(1): 197–214.
Nice09	Nice, C. C., Gompert, Z., Forister, M. L., & Fordyce, J. A. (2009). An unseen foe in arthropod conservation efforts: The case of< i> Wolbachia</i> infections in the Karner blue butterfly. Biological Conservation, 142(12), 3137–3146.
Nielsen04	Nielsen, H., Fournier, P.-E., Pedersen, I. S., Krarup, H., Ejlertsen, T., & Raoult, D. (2004). Serological and molecular evidence of Rickettsia helvetica in Denmark. Scandinavian Journal of Infectious Diseases, 36(8), 559–563. doi:10.1080/00365540410020776
Nijhof07	Nijhof, A. M., Bodaan, C., Postigo, M., Nieuwenhuijs, H., Opsteegh, M., Franssen, L., … Jongejan, F. (2007). Ticks and Associated Pathogens Collected from Domestic Animals in the Netherlands. Vector-Borne and Zoonotic Diseases, 7(4), 585–596. doi:10.1089/vbz.2007.0130
Nirgianaki03	Nirgianaki, A., Banks, G. K., Frohlich, D. R., Veneti, Z., Braig, H. R., Miller, T. A., … Bourtzis, K. (2003). Wolbachia Infections of the Whitefly Bemisia tabaci. Current Microbiology, 47(2), 0093–0101. doi:10.1007/s00284-002-3969-1
Noda01a	Noda, H., Koizumi, Y., Zhang, Q., & Deng, K. J. (2001). Infection density of Wolbachia and incompatibility level in two planthopper species, Laodelphax striatellus and Sogatella furcifera. Insect Biochemistry and Molecular Biology, 31(6-7), 727–737. doi:10.1016/S0965-1748(00)00180-6
Noda01b	Noda, H., Miyoshi, T., Zhang, Q., Watanabe, K., Deng, K., & Hoshizaki, S. (2001). Wolbachia infection shared among planthoppers (Homoptera_: Delphacidae) and their endoparasite (Strepsiptera_: Elenchidae): a probable case of interspecies transmission. Molecular Ecology, 10(8), 2101–2106. doi:10.1046/j.0962-1083.2001.01334.x
Nogueras11	Nogueras, M. M., Pons, I., Ortuño, A., Lario, S., & Segura, F. (2011). Rickettsia felis in fleas from Catalonia (Northeast Spain). Vector-Borne and Zoonotic Diseases, 11(5), 479–483.
Noor15	Noor Afizah A, Roziah A, Nazni WA, Lee HL. (2015) Detection of Wolbachia from field collected Aedes albopictus Skuse in Malaysia. Indian J Med Res 142(2):205-10. doi: 10.4103/0971-5916.164259.
Nugapola17	Nugapola, N. W. N. P., De Silva, W. A. P. P., & Karunaratne, S. H. P. P. (2017). Distribution and phylogeny of Wolbachia strains in wild mosquito populations in Sri Lanka. Parasites & Vectors 10:230. doi: 10.1186/s13071-017-2174-9
Nugapola17	Nugapola NWNP, De Silva WAPP, Karunaratne SHPP. (2017). Distribution and phylogeny of Wolbachia strains in wild mosquito populations in Sri Lanka. Parasit Vectors. 10(1):230. doi: 10.1186/s13071-017-2174-9.
Nyiro02	Nyiro, G., Oravecz, O., & Márialigeti, K. (2002). Detection of Wolbachia pipientis infection in arthropods in Hungary. European Journal of Soil Biology, 38(1), 63–66. doi:10.1016/S1164-5563(01)01127-X
Oliveira02	Oliveira, R. P., Galvão, M. A. M., Mafra, C. L., Chamone, C. B., Calic, S. B., Silva, S. U., & Walker, D. H. (2002). Rickettsia felis in Ctenocephalides spp. fleas, Brazil. Emerging Infectious Diseases, 8(3), 317–319. doi:10.3201/eid0803.010301
Osei-Poku12	Osei-Poku, J., Han, C., Mbogo, C. M., & Jiggins, F. M. (2012). Identification of Wolbachia Strains in Mosquito Disease Vectors. PLoS ONE, 7(11), e49922. doi:10.1371/journal.pone.0049922
Oteo06	Oteo, J. a., Portillo, A., Santibáñez, S., Pérez-Martínez, L., Blanco, J. r., Jiménez, S., … Sanz, M. (2006). Prevalence of Spotted Fever Group Rickettsia Species Detected in Ticks in La Rioja, Spain. Annals of the New York Academy of Sciences, 1078(1), 320–323. doi:10.1196/annals.1374.060
Oteo14	Oteo JA, Portillo A, Portero F, Zavala-Castro J, Venzal JM, Labruna MB. (2014). 'Candidatus Rickettsia asemboensis' and Wolbachia spp. in Ctenocephalides felis and Pulex irritans fleas removed from dogs in Ecuador. Parasit Vectors. 7:455. doi: 10.1186/s13071-014-0455-0.
Overzier13	Overzier, E., Pfister, K., Herb, I., Mahling, M., Böck, G., Jr, & Silaghi, C. (2013). Detection of tick-borne pathogens in roe deer (Capreolus capreolus), in questing ticks (Ixodes ricinus), and in ticks infesting roe deer in southern Germany. Ticks and Tick-Borne Diseases, 4(4), 320–328. doi:10.1016/j.ttbdis.2013.01.004
Pacheco08	Pacheco Richard, R. S. (2008). Isolation of Rickettsia bellii from Amblyomma ovale and Amblyomma incisum ticks from southern Brazil. Revista Mvz Cordoba.
Pacheco11	Pacheco, R. C., Moraes-Filho, J., Guedes, E., Silveira, I., Richtzenhain, L. J., Leite, R. C., & Labruna, M. B. (2011). Rickettsial infections of dogs, horses and ticks in Juiz de Fora, southeastern Brazil, and isolation of Rickettsia rickettsii from Rhipicephalus sanguineus ticks. MEDICAL AND VETERINARY ENTOMOLOGY, 25(2), 148–155. doi:10.1111/j.1365-2915.2010.00915.x
Pacheco12	Pacheco, R. C., Arzua, M., Nieri-Bastos, F. A., Moraes-Filho, J., Marcili, A., Richtzenhain, L. J., … Labruna, M. B. (2012). Rickettsial Infection in Ticks (Acari: Ixodidae) Collected on Birds in Southern Brazil. JOURNAL OF MEDICAL ENTOMOLOGY, 49(3), 710–716. doi:10.1603/ME11217
Paddock10	Paddock, C. D., Fournier, P.-E., Sumner, J. W., Goddard, J., Elshenawy, Y., Metcalfe, M. G., … Varela-Stokes, A. (2010). Isolation of Rickettsia parkeri and Identification of a Novel Spotted Fever Group Rickettsia sp. from Gulf Coast Ticks (Amblyomma maculatum) in the United States. Applied and Environmental Microbiology, 76(9), 2689–2696. doi:10.1128/AEM.02737-09
Pages17	Pagès N, Muñoz-Muñoz F, Verdún M, Pujol N, Talavera S. 2017. First detection of Wolbachia-infected Culicoides (Diptera: Ceratopogonidae) in Europe: Wolbachia and Cardinium infection across Culicoides communities revealed in Spain. Parasit Vectors. 10:582. doi: 10.1186/s13071-017-2486-9.
Pappalardo16	Pappalardo AM, D'Urso V, Viscuso R, Ferrito V, Giunta MC, Cupani S, Vitale DG. (2016). Morphostructural investigation of the female reproductive system and molecular evidence for Wolbachia in Balclutha brevis Lindberg 1954 (Hemiptera, Cicadellidae). Micron. 81:23-33. doi: 10.1016/j.micron.2015.12.003.
Park16	Park, C. H., Lim, H., Kim, H., Lee, W. G., Roh, J. Y., Park, M. Y., & Shin E.-H. (2016). High prevalence of Wolbachia infection in Korean populations of Aedes albopictus (Diptera: Culicidae). Journal of Asia-Pacific Entomology 19: 191-194.
Parola03	Parola, P., Cornet, J.-P., Sanogo, Y. O., Miller, R. S., Thien, H. V., Gonzalez, J.-P., … Wongsrichanalai, C. (2003). Detection of Ehrlichia spp., Anaplasma spp., Rickettsia spp., and Other Eubacteria in Ticks from the Thai-Myanmar Border and Vietnam. Journal of Clinical Microbiology, 41(4), 1600–1608. doi:10.1128/JCM.41.4.1600-1608.2003
Parola07	Parola, P., Matsumoto, K., Socolovschi, C., Parzy, D., & Raoult, D. (2007). A tick-borne rickettsia of the spotted-fever group, similar to Rickettsia amblyommii, in French Guyana. Annals of Tropical Medicine and Parasitology, 101(2), 185–188. doi:10.1179/136485907154557
Parola08	Parola, P., Socolovschi, C., Jeanjean, L., Bitam, I., Fournier, P. E., Sotto, A., Labauge, P., & Raoult, D. (2008). Warmer weather linked to tick attack and emergence of severe rickettsioses. PLoS Negl Trop Dis. 2(11):e338. doi: 10.1371/journal.pntd.0000338.
Parrella14	Parrella G, Nappo AG, Manco E, Greco B, Giorgini M. (2014). Invasion of the Q2 mitochondrial variant of Mediterranean Bemisia tabaci in southern Italy: possible role of bacterial endosymbionts. Pest Manag Sci. 2014 Oct;70(10):1514-23. doi: 10.1002/ps.3686. Epub 2013 Dec 17.
Parvizi13	Parvizi, P., Fardid, F., & Soleimani, S. (2013). Detection of a New Strain of Wolbachia pipientis in Phlebotomus perfiliewi transcaucasicus, a Potential Vector of Visceral Leishmaniasis in North West of Iran, by Targeting the Major Surface Protein Gene. Journal of Arthropod-Borne Diseases, 7(1), 46–55.
Pattabhiramaiah11a	Pattabhiramaiah, M., Brueckner, D., Witzel, K. P., Junier, P., & Reddy, M. S. (2011). Prevalence of Wolbachia in the European Honeybee, Apis mellifera carnica. World Applied Sciences Journal, 15(11), 1503–1506.
Pattabhiramaiah11b	Pattabhiramaiah, M., Brueckner, D., Witzel, K. P., & Reddy, M. S. (2011). Wolbachia Endosymbiont in the workers of European honeybee, Apis mellifera carnica. Electronic Journal of Biology, 7(4), 81–85.
Pattabhiramaiah12a	Pattabhiramaiah, M., Brueckner, D., & Reddy, M. S. (2012). Absence of Wolbachia in the workers of Asian honeybee, Apis cerana indica. International Journal of Life Sciences, 5(1), 19–24.
Pattabhiramaiah12b	Pattabhiramaiah, M., Reddy, M. S., & Brueckner, D. (2012). Presence of Wolbachia in the Lepidopteran insect pests of mulberry. Retrieved from http://rpublishing.org/Journal/IJEER/Vol1Issue1/eer1103.pdf
Paulson14	Paulson, A. R., von Aderkas, P., & Perlman, S. J. (2014). Bacterial associates of seed-parasitic wasps (Hymenoptera: Megastigmus). BMC Microbiology 14:224. doi:10.1186/s12866-014-0224-4
Perez-Ruiz15	Pérez-Ruiz, M., Martinez-Rodriguez, P., Herranz, J., Bella, J. L. (2015). A survey of Wolbachia, Spiroplasma and other bacteria in parthenogenetic and non-parthenogenetic phasmid (Phasmatodea) species. Eur. J. Entomol. 112(3):409–418. doi:10.14411/eje.2015.061.
Perlman08	Perlman, S. J., Kelly, S. E., & Hunter, M. S. (2008). Population Biology of Cytoplasmic Incompatibility: Maintenance and Spread of Cardinium Symbionts in a Parasitic Wasp. Genetics, 178(2), 1003–1011. doi:10.1534/genetics.107.083071
Perlman10	Perlman, S. J., Magnus, S. A., & Copley, C. R. (2010). Pervasive associations between Cybaeus spiders and the bacterial symbiont Cardinium. JOURNAL OF INVERTEBRATE PATHOLOGY, 103(3), 150–155. doi:10.1016/j.jip.2009.12.009
Perotti06	Perotti, M. A., Clarke, H. K., Turner, B. D., & Braig, H. R. (2006). Rickettsia as obligate and mycetomic bacteria. The FASEB Journal, 20(13), 2372–2374. doi:10.1096/fj.06-5870fje
Perotti16	Perotti MA, Young DK, Braig HR. (2016). The ghost sex-life of the paedogenetic beetle Micromalthus debilis. Sci Rep. 6:27364. doi: 10.1038/srep27364.
Phan11	Phan, J. N., Lu, C. R., Bender, W. G., Smoak III, R. M., & Zhong, J. (2011). Molecular Detection and Identification of Rickettsia Species in Ixodes pacificus in California. Vector-Borne and Zoonotic Diseases, 11(7), 957–961.
Pichon06	Pichon, B., Kahl, O., Hammer, B., & Gray, J. S. (2006). Pathogens and host DNA in Ixodes ricinus nymphal ticks from a German forest. Vector Borne and Zoonotic Diseases (Larchmont, N.Y.), 6(4), 382–387. doi:10.1089/vbz.2006.6.382
Pillay11	Pillay, P., Sweby, D., Martin, L., Zulu, M., Conlong, D., Rutherford, R., & others. (2011). Effects of Wolbachia infection on the interactions between Eldana saccharina and its insect parasitoids. In Proceedings of the Annual Congress-South African Sugar Technologists’ Association (pp. 292–297). South African Sugar Technologists’ Association.
Pistone14	Pistone D, Bione A, Epis S, Pajoro M, Gaiarsa S, Bandi C, Sassera D. (2014). Presence of Wolbachia in three hymenopteran species: Diprion pini (Hymenoptera: Diprionidae), Neodiprion sertifer (Hymenoptera: Diprionidae), and Dahlbominus fuscipennis (Hymenoptera: Eulophidae). J Insect Sci. 14:147. doi: 10.1093/jisesa/ieu009.
Plantard12	Plantard, O., Bouju-Albert, A., Malard, M.-A., Hermouet, A., Capron, G., & Verheyden, H. (2012). Detection of Wolbachia in the Tick Ixodes ricinus is Due to the Presence of the Hymenoptera Endoparasitoid Ixodiphagus hookeri. PLOS ONE, 7(1). doi:10.1371/journal.pone.0030692
Plantard99_Field99	Plantard, O., Rasplus, J. Y., Mondor, G., Le Clainche, I., & Solignac, M. (1999). Distribution and phylogeny of Wolbachia inducing thelytoky in Rhoditini and “Aylacini” (Hymenoptera: Cynipidae). Insect Molecular Biology, 8(2), 185–191.
Plichart05	Plichart, C., & Legrand, A.-M. (2005). Detection and Characterization of Wolbachia Infections in Wuchereria Bancrofti (spirurida: Onchocercidae) Var. Pacifica and Aedes (stegomyia) Polynesiensis (diptera: Culicidae). The American Journal of Tropical Medicine and Hygiene, 73(2), 354–358.
Pluta09_10	Pluta, S., Hartelt, K., Oehme, R., Mackenstedt, U., & Kimmig, P. (2010). Prevalence of Coxiella burnetii and Rickettsia spp. in ticks and rodents in southern Germany. Ticks and Tick-Borne Diseases, 1(3), 145–147. doi:10.1016/j.ttbdis.2010.04.001
Pluta09_10	Pluta, S., Tewald, F., Hartelt, K., Oehme, R., Kimmig, P., & Mackenstedt, U. (2009). Rickettsia slovaca in Dermacentor marginatus ticks, Germany. Emerging Infectious Diseases, 15(12), 2077.
Poorjavad12	Poorjavad, N., Goldansaz, S. H., Machtelinckx, T., Tirry, L., Stouthamer, R., & van Leeuwen, T. (2012). Iranian Trichogramma: ITS2 DNA characterization and natural Wolbachia infection. BIOCONTROL, 57(3), 361–374. doi:10.1007/s10526-011-9397-z
Pourali09	Pourali, P., Roayaei Ardakani, M., Jolodar, A., & Razi Jalali, M. H. (2009). PCR screening of the Wolbachia in some arthropods and nematodes in Khuzestan province. IRANIAN JOURNAL OF VETERINARY RESEARCH (IJVR).
Prakash06	Prakash, B. M., & Puttaraju, H. P. (2006). Wolbachia endosymbiont in some insect pests of sericulture. Current Science, 90(12), 1671–1674.
Psaroulaki06	Psaroulaki, A., Antoniou, M., Papaeustathiou, A., Toumazos, P., Loukaides, F., & Tselentis, Y. (2006). First detection of Rickettsia felis in Ctenocephalides felis fleas parasitizing rats in Cyprus. The American Journal of Tropical Medicine and Hygiene, 74(1), 120–122.
Punda-Polic02	Punda-Polic, V., Petrovec, M., Trilar, T., Duh, D., Bradaric, N., Klismanic, Z., & Avsic-Zupanc, T. (2002). Detection and identification of spotted fever group rickettsiae in ticks collected in southern Croatia. Experimental & Applied Acarology, 28(1-4), 169–176.
Raharimalala16	Raharimalala FN, Boukraa S, Bawin T, Boyer S, Francis F. (2016). Molecular detection of six (endo-) symbiotic bacteria in Belgian mosquitoes: first step towards the selection of appropriate paratransgenesis candidates. Parasitol Res. 115(4):1391-9. doi: 10.1007/s00436-015-4873-5.
Ramalho17b	Ramalho MO, Martins C, Silva LM, Martins VG, Bueno OC. (2017). Intracellular Symbiotic Bacteria of Camponotus textor, Forel (Hymenoptera, Formicidae). Curr Microbiol. 74(5):589-597. doi: 10.1007/s00284-017-1201-6.
Rasgon04	Rasgon, J. L., & Scott, T. W. (2004). An initial survey for Wolbachia (Rickettsiales_: Rickettsiaceae) infections in selected california mosquitoes (Diptera_: Culicidae). Journal of Medical Entomology, 41(2), 255–257. doi:10.1603/0022-2585-41.2.255
Raupach14	Raupach, M. J., Bininda-Emonds, O. R. P., Knebelsberger, T., Laakmann, S., Pfaender, J. and Leese, F. (2014), Phylogeographical analysis of Ligia oceanica (Crustacea: Isopoda) reveals two deeply divergent mitochondrial lineages. Biol J Linn Soc Lond, 112: 16–30. doi:10.1111/bij.12254
Reeves05	Reeves, W. K., Nelder, M. P., & Korecki, J. A. (2005). Bartonella and Rickettsia in fleas and lice from mammals in South Carolina, USA. Journal of Vector Ecology, 30(2), 310–315.
Reeves06a	Reeves, W. K., Szumlas, D. E., Moriarity, J. R., Loftis, A. D., Abbassy, M. M., Helmy, I. M., & Dasch, G. A. (2006). Louse-borne bacterial pathogens in lice (Phthiraptera) of rodents and cattle from Egypt. Journal of Parasitology, 92(2), 313–318. doi:10.1645/GE-717R.1
Reeves06b	Reeves, W. K., Loftis, A. D., Sanders, F., Spinks, M. D., Wills, W., Denison, A. M., & Dasch, G. A. (2006). Borrelia, Coxiella, and Rickettsia in Carios capensis (Acari: Argasidae) from a brown pelican (Pelecanus occidentalis) rookery in South Carolina, USA. Experimental & Applied Acarology, 39(3-4), 321–329. doi:10.1007/s10493-006-9012-7
Reeves07	Reeves, W. K., Loftis, A. D., Szumlas, D. E., Abbassy, M. M., Helmy, I. M., Hanafi, H. A., & Dasch, G. A. (2007). Rickettsial pathogens in the tropical rat mite Ornithonyssus bacoti (Acari: Macronyssidae) from Egyptian rats (Rattus spp.). Experimental & Applied Acarology, 41(1-2), 101–107. doi:10.1007/s10493-006-9040-3
Reeves12a	Reeves, W. K., UTTER, C. M., & DURDEN, L. (2012). Rickettsial pathogens and arthropod vectors of medical and veterinary significance on Kwajalein Atoll and Wake Island. Micronesica, 43(1), 107–113.
Reeves12b	Reeves, W. K., Wolf, S., RABAGO, R., GUTIERREZ, T., NUNN, P., JOHNSON, J., & VICE, D. (2012). Invertebrate Vectors, Parasites, and Rickettsial Agents in Guam. Micronesica, 43(2), 225–236.
Reuter05	Reuter, M., Pedersen, J. S., & Keller, L. (2005). Loss of Wolbachia infection during colonisation in the invasive Argentine ant Linepithema humile. Heredity, 94(3), 364–369. doi:10.1038/sj.hdy.6800601
Rey13	Rey, O., Estoup, A., Facon, B., Loiseau, A., Aebi, A., Duron, O., … Foucaud, J. (2013). Distribution of Endosymbiotic Reproductive Manipulators Reflects Invasion Process and Not Reproductive System Polymorphism in the Little Fire Ant Wasmannia auropunctata. PloS One, 8(3), e58467.
Reye12	Reye, A. L., Arinola, O. G., Hübschen, J. M., & Muller, C. P. (2012). Pathogen Prevalence in Ticks Collected from the Vegetation and Livestock in Nigeria. Applied and Environmental Microbiology, 78(8), 2562–2568. doi:10.1128/AEM.06686-11
Reye13	Reye, A. L., Stegniy, V., Mishaeva, N. P., Velhin, S., Hübschen, J. M., Ignatyev, G., & Muller, C. P. (2013). Prevalence of Tick-Borne Pathogens in Ixodes ricinus and Dermacentor reticulatus Ticks from Different Geographical Locations in Belarus. PLoS ONE, 8(1), e54476. doi:10.1371/journal.pone.0054476
Ritter13	Ritter, S., Michalski, S. G., Settele, J., Wiemers, M., Fric, Z. F., Sielezniew, M., … Durka, W. (2013). Wolbachia Infections Mimic Cryptic Speciation in Two Parasitic Butterfly Species, Phengaris teleius and P. nausithous (Lepidoptera: Lycaenidae). PLoS ONE, 8(11), e78107. doi:10.1371/journal.pone.0078107
Robinson09	Robinson, J. B., Eremeeva, M. E., Olson, P. E., Thornton, S. A., Medina, M. J., Sumner, J. W., & Dasch, G. A. (2009). New Approaches to Detection and Identification of Rickettsia africae and Ehrlichia ruminantium in Amblyomma variegatum (Acari: Ixodidae) Ticks From the Caribbean. JOURNAL OF MEDICAL ENTOMOLOGY, 46(4), 942–951. doi:10.1603/033.046.0429
Rodriguero10	Rodriguero, M. S., Confalonieri, V. A., Guedes, J. V. C., & Lanteri, A. A. (2010). Wolbachia infection in the tribe Naupactini (Coleoptera, Curculionidae): association between thelytokous parthenogenesis and infection status. INSECT MOLECULAR BIOLOGY, 19(5), 631–640. doi:10.1111/j.1365-2583.2010.01018.x
Rokas01	Rokas, A., Atkinson, R. J., Brown, G. S., West, S. A., & Stone, G. N. (2001). Understanding patterns of genetic diversity in the oak gallwasp Biorhiza pallida: demographic history or a Wolbachia selective sweep? Heredity, 87(Pt 3), 294–304.
Rokas02	Rokas, A., Atkinson, R. J., Nieves-Aldrey, J.-L., West, S. A., & Stone, G. N. (2002). The incidence and diversity of Wolbachia in gallwasps (Hymenoptera; Cynipidae) on oak. Molecular Ecology, 11(9), 1815–1829.
Rolain03	Rolain, J.-M., Franc, M., Davoust, B., & Raoult, D. (2003). Molecular Detection of Bartonella quintana, B. koehlerae, B. henselae, B. clarridgeiae, Rickettsia felis, and Wolbachia pipientis in Cat Fleas, France. Emerging Infectious Diseases, 9(3), 339–342. doi:10.3201/eid0903.020278
Rolain05	Rolain, J.-M., Bourry, O., Davoust, B., & Raoult, D. (2005). Bartonella quintana and Rickettsia felis in Gabon. Emerging Infectious Diseases, 11(11), 1742–1744. doi:10.3201/eid1111.050861
Ros12	Ros, V. I. D., Fleming, V. M., Feil, E. J., & Breeuwer, J. A. J. (2012). Diversity and recombination in Wolbachia and Cardinium from Bryobia spider mites. BMC Microbiology, 12(Suppl 1), S13. doi:10.1186/1471-2180-12-S1-S13
Roucher12	Roucher, C., Mediannikov, O., Diatta, G., Trape, J. F., & Raoult, D. (2012). A new rickettsia species found in fleas collected from human dwellings and from domestic cats and dogs in Senegal. Vector-Borne and Zoonotic Diseases, 12(5), 360–365.
Roy15	Roy V, Girondot M, Harry M. (2015) The distribution of Wolbachia in Cubitermes (Termitidae, Termitinae) castes and colonies: a modelling approach. PLoS One 10(2):e0116070. doi: 10.1371/journal.pone.0116070.
Russell09	Russell, J. A., Goldman-Huertas, B., Moreau, C. S., Baldo, L., Stahlhut, J. K., Werren, J. H., & Pierce, N. E. (2009). Specialization and geographic isolation among Wolbachia symbionts from ants and lycaenid butterflies. Evolution; International Journal of Organic Evolution, 63(3), 624–640. doi:10.1111/j.1558-5646.2008.00579.x
Russell12	Russell, J. A., Funaro, C. F., Giraldo, Y. M., Goldman-Huertas, B., Suh, D., Kronauer, D. J., … Pierce, N. E. (2012). A Veritable Menagerie of Heritable Bacteria from Ants, Butterflies, and Beyond: Broad Molecular Surveys and a Systematic Review. PloS One, 7(12), e51027.
Russell13	Russell, J. A., Weldon, S., Smith, A. H., Kim, K. L., Hu, Y., _ukasik, P., … Oliver, K. M. (2013). Uncovering symbiont-driven genetic diversity across North American pea aphids. Molecular Ecology, 22(7), 2045–2059. doi:10.1111/mec.12211
Rydkina99	Rydkina, E., Roux, V., Rudakov, N., Gafarova, M., Tarasevich, I., & Raoult, D. (1999). New Rickettsiae in ticks collected in territories of the former soviet union. Emerging Infectious Diseases, 5(6), 811–814.
Sabatini10	Sabatini, G. S., Pinter, A., Nieri-Bastos, F. A., Marcili, A., & Labruna, M. B. (2010). Survey of Ticks (Acari: Ixodidae) and Their Rickettsia in an Atlantic Rain Forest Reserve in the State of Sao Paulo, Brazil. JOURNAL OF MEDICAL ENTOMOLOGY, 47(5), 913–916. doi:10.1603/ME10073
Saeed15	Saeed, A., White J. A. (2015). Surveys for maternally-inherited endosymbionts reveal novel and variable infections within solitary bee species. J Invertebr Pathol 132:111-4. doi:10.1016/j.jip.2015.09.011.
Sakamoto06	Sakamoto, J. M., & Rasgon, J. L. (2006). Geographic distribution of Wolbachia infections in Cimex lectularius (Heteroptera: Cimicidae). Journal of Medical Entomology, 43(4), 696–700.
Sakamoto11	Sakamoto, Y., Hirai, N., Tanikawa, T., Yago, M., & Ishii, M. (2011). Infection by Two Strains of Wolbachia and Sex Ratio Distortion in a Population of the Endangered Butterfly Zizina emelina (Lepidoptera: Lycaenidae) in Northern Osaka Prefecture, Central Japan. ANNALS OF THE ENTOMOLOGICAL SOCIETY OF AMERICA, 104(3), 483–487. doi:10.1603/AN09168
Sakamoto15	Sakamoto Y, Hirai N, Tanikawa T, Yago M, Ishii M. (2015). Population genetic structure and Wolbachia infection in an endangered butterfly, Zizina emelina (Lepidoptera, Lycaenidae), in Japan. Bull Entomol Res. 105(2):152-65. doi: 10.1017/S0007485314000819.
Salunke12	Salunke, B. K., Salunkhe, R. C., Dhotre, D. P., Walujkar, S. A., Khandagale, A. B., Chaudhari, R., … Werren, J. H. (2012). Determination of Wolbachia Diversity in Butterflies from Western Ghats, India, by a Multigene Approach. Applied and Environmental Microbiology, 78(12), 4458–4467.
Sarih08	Sarih, M., Socolovschi, C., Boudebouch, N., Hassar, M., Raoult, D., & Parola, P. (2008). Spotted Fever Group Rickettsiae in Ticks, Morocco. Emerging Infectious Diseases, 14(7), 1067–1073. doi:10.3201/eid1407.070096
Sarwar18	Sarwar MS, Jahan N, Shahbaz F. 2018. Molecular Detection and Characterization of Wolbachia pipientis from Culex quinquefasciatus Collected from Lahore, Pakistan. Am J Trop Med Hyg. 98:154-161. doi: 10.4269/ajtmh.17-0329.
Sasaki99	Sasaki, T., & Ishikawa, H. (1999). Wolbachia Infections and Cytoplasmic Incompatibility in the Almond Moth and the Mediterranean Flour Moth. Zoological Science, 16(5), 739–744. doi:10.2108/zsj.16.739
Sazama17	Sazama, E. J., Bosch, M. J., Shouldis, C. S., Ouellette, S. P., Wesner J. S. (2017). Incidence of Wolbachia in aquatic insects. Ecology and Evolution 7(4): 1165–1169. doi: 10.1002/ece3.2742
Schicht12	Schicht, S., Schnieder, T., & Strube, C. (2012). Rickettsia spp. and Coinfections With Other Pathogenic Microorganisms in Hard Ticks From Northern Germany. JOURNAL OF MEDICAL ENTOMOLOGY, 49(3), 766–771. doi:10.1603/ME11204
Schneider13	Schneider, D. I., Garschall, K. I., Parker, A. G., Abd-Alla, A. M. M., & Miller, W. J. (2013). Global Wolbachia prevalence, titer fluctuations and their potential of causing cytoplasmic incompatibilities in tsetse flies and hybrids of Glossina morsitans subgroup species. Journal of Invertebrate Pathology, 112 Suppl, S104–115. doi:10.1016/j.jip.2012.03.024
Schuler11	Schuler, H., Arthofer, W., Riegler, M., Bertheau, C., Krumboeck, S., Koeppler, K., … Stauffer, C. (2011). Multiple Wolbachia infections in Rhagoletis pomonella. ENTOMOLOGIA EXPERIMENTALIS ET APPLICATA, 139(2), 138–144. doi:10.1111/j.1570-7458.2011.01115.x
Schulze11	Schulze, T. L., Jordan, R. A., White, J. C., Roegner, V. E., & Healy, S. P. (2011). Geographical distribution and prevalence of selected Borrelia, Ehrlichia, and Rickettsia infections in Amblyomma americanum (Acari: Ixodidae) in New Jersey. Journal of the American Mosquito Control Association, 27(3), 236–244. doi:10.2987/11-6111.1
[truncated: 123 more rows]
